# Supplementary material
Source: PubMed Central journal article supplement (PMC5423080)

## Stereoselectivity of conformationally restricted glucosazide donors

Stefan van der Vorm, Herman S. Overkleef, Gijsbert A. van der Marel, Jeroen D. C. Codée\*

*Leiden Institute of Chemistry, Leiden University, Einsteinweg 55, 2333 CC Leiden, The Netherlands*

\*e-mail: jcodee@chem.leidenuniv.nl

### Contents:

|                                                                                             |           |                                                                                                                    |     |
|---------------------------------------------------------------------------------------------|-----------|--------------------------------------------------------------------------------------------------------------------|-----|
| NMR spectra for product                                                                     | <b>2</b>  | <sup>1</sup> H, <sup>13</sup> C, COSY, HSQC                                                                        | S3  |
|                                                                                             | <b>5</b>  | <sup>1</sup> H, <sup>13</sup> C, COSY, HSQC                                                                        | S5  |
|                                                                                             | <b>14</b> | <sup>1</sup> H, <sup>13</sup> C, COSY, HSQC                                                                        | S9  |
|                                                                                             | <b>16</b> | <sup>1</sup> H, <sup>13</sup> C, COSY, HSQC                                                                        | S11 |
|                                                                                             | <b>24</b> | <sup>1</sup> H, <sup>13</sup> C, COSY, HSQC                                                                        | S13 |
| NMR spectra for triflates                                                                   | <b>19</b> | <sup>1</sup> H, <sup>13</sup> C, <sup>19</sup> F, COSY, HSQC,<br>decomposition: stacked <sup>1</sup> H -80°C – 0°C | S15 |
|                                                                                             | <b>20</b> | <sup>1</sup> H, <sup>13</sup> C, COSY, HSQC, HMBC,<br>decomposition: stacked <sup>1</sup> H -80°C – 0°C            | S18 |
|                                                                                             | <b>21</b> | <sup>1</sup> H, <sup>13</sup> C, COSY, HSQC,<br>decomposition: stacked <sup>1</sup> H -80°C – 0°C                  | S21 |
|                                                                                             | <b>22</b> | <sup>1</sup> H, <sup>13</sup> C, COSY, HSQC,<br>activation & decomposition: stacked <sup>1</sup> H -80°C – 0°C     | S24 |
|                                                                                             | <b>23</b> | decomposition: stacked <sup>1</sup> H -80°C – 0°C                                                                  | S27 |
| <sup>1</sup> H NMR spectra for disaccharide product fractions of competitive glycosylations |           |                                                                                                                    |     |
|                                                                                             |           | Donor <b>1</b> vs <b>2</b> ; products <b>1C</b> and <b>2C</b>                                                      | S27 |
|                                                                                             |           | Donor <b>1</b> vs <b>3</b> ; product <b>1C</b>                                                                     | S28 |
|                                                                                             |           | Donor <b>2</b> vs <b>3</b> ; products <b>2C</b> and <b>3C</b>                                                      | S28 |
|                                                                                             |           | Donor <b>3</b> vs <b>4</b> ; products <b>3C</b> and <b>4C</b>                                                      | S29 |
|                                                                                             |           | Donor <b>4</b> vs <b>5</b> ; product <b>4C</b>                                                                     | S29 |
| NMR spectra for product                                                                     | <b>2A</b> | <sup>1</sup> H, <sup>13</sup> C, COSY, HSQC                                                                        | S30 |
|                                                                                             | <b>2B</b> | <sup>1</sup> H, <sup>13</sup> C, COSY, HSQC                                                                        | S32 |
|                                                                                             | <b>2C</b> | <sup>1</sup> H, <sup>13</sup> C, COSY, HSQC, HMBC                                                                  | S34 |
|                                                                                             | <b>2D</b> | <sup>1</sup> H, <sup>13</sup> C, COSY, HSQC                                                                        | S36 |
|                                                                                             | <b>2E</b> | <sup>1</sup> H, <sup>13</sup> C, COSY, HSQC, HMBC                                                                  | S38 |
|                                                                                             | <b>2F</b> | <sup>1</sup> H, <sup>13</sup> C, COSY, HSQC, HMBC                                                                  | S41 |
|                                                                                             | <b>2G</b> | <sup>1</sup> H, <sup>13</sup> C, COSY, HSQC                                                                        | S43 |
|                                                                                             | <b>2H</b> | <sup>1</sup> H, <sup>13</sup> C, COSY, HSQC, HMBC                                                                  | S47 |
|                                                                                             | <b>2I</b> | <sup>1</sup> H, <sup>13</sup> C, COSY, HSQC, HMBC                                                                  | S50 |
|                                                                                             | <b>2J</b> | <sup>1</sup> H, <sup>13</sup> C, COSY, HSQC                                                                        | S52 |
|                                                                                             | <b>2K</b> | <sup>1</sup> H, <sup>13</sup> C, COSY, HSQC, HMBC, NOESY                                                           | S54 |

|                         |           |                                                                         |      |
|-------------------------|-----------|-------------------------------------------------------------------------|------|
| NMR spectra for product | <b>3A</b> | <sup>1</sup> H, <sup>13</sup> C, COSY, HSQC, HMBC-GATED                 | S57  |
|                         | <b>3B</b> | <sup>1</sup> H, <sup>13</sup> C, COSY, HSQC                             | S60  |
|                         | <b>3C</b> | <sup>1</sup> H, <sup>13</sup> C, COSY, HSQC, HMBC                       | S62  |
|                         | <b>3D</b> | <sup>1</sup> H, <sup>13</sup> C, COSY, HSQC, HMBC-GATED                 | S64  |
|                         | <b>3E</b> | <sup>1</sup> H, <sup>13</sup> C, COSY, HSQC, TOCSY                      | S67  |
|                         | <b>3F</b> | <sup>1</sup> H, <sup>13</sup> C, COSY, HSQC, HMBC                       | S69  |
|                         | <b>3G</b> | <sup>1</sup> H, <sup>13</sup> C, COSY, HSQC, HMBC-GATED                 | S72  |
|                         | <b>3H</b> | <sup>1</sup> H, <sup>13</sup> C, COSY, HSQC, HMBC                       | S74  |
|                         | <b>3I</b> | <sup>1</sup> H, <sup>13</sup> C, COSY, HSQC, HMBC                       | S77  |
|                         | <b>3J</b> | <sup>1</sup> H, <sup>13</sup> C, COSY, HSQC, HMBC-GATED                 | S79  |
|                         | <b>3K</b> | <sup>1</sup> H, <sup>13</sup> C, COSY, HSQC                             | S82  |
| NMR spectra for product | <b>4A</b> | <sup>1</sup> H, <sup>13</sup> C, COSY, HSQC                             | S84  |
|                         | <b>4B</b> | <sup>1</sup> H, <sup>13</sup> C, COSY, HSQC                             | S86  |
|                         | <b>4C</b> | <sup>1</sup> H, <sup>13</sup> C, COSY, HSQC, HMBC                       | S88  |
|                         | <b>4D</b> | <sup>1</sup> H, <sup>13</sup> C, COSY, HSQC                             | S90  |
|                         | <b>4E</b> | <sup>1</sup> H, <sup>13</sup> C, COSY, HSQC, HMBC                       | S92  |
|                         | <b>4F</b> | <sup>1</sup> H, <sup>13</sup> C, COSY, HSQC, HMBC                       | S95  |
|                         | <b>4G</b> | <sup>1</sup> H, <sup>13</sup> C, COSY, HSQC                             | S97  |
|                         | <b>4H</b> | <sup>1</sup> H, <sup>13</sup> C, COSY, HSQC, HMBC                       | S99  |
|                         | <b>4I</b> | <sup>1</sup> H, <sup>13</sup> C, COSY, HSQC, HMBC                       | S102 |
|                         | <b>4J</b> | <sup>1</sup> H, <sup>13</sup> C, COSY, HSQC                             | S104 |
| NMR spectra for product | <b>5A</b> | <sup>1</sup> H, <sup>13</sup> C, COSY, HSQC                             | S106 |
|                         | <b>5B</b> | <sup>1</sup> H, <sup>13</sup> C, COSY, HSQC                             | S108 |
|                         | <b>5C</b> | <sup>1</sup> H, <sup>13</sup> C, COSY, HSQC, HMBC, HMBC-GATED           | S110 |
|                         | <b>5D</b> | <sup>1</sup> H, <sup>13</sup> C, COSY, HSQC                             | S113 |
|                         | <b>5E</b> | <sup>1</sup> H, <sup>13</sup> C, COSY, HSQC, HMBC, HMBC-GATED           | S115 |
|                         | <b>5F</b> | <sup>1</sup> H, <sup>13</sup> C, COSY, HSQC, HMBC,<br>HMBC-GATED, NOESY | S119 |
|                         | <b>5G</b> | <sup>1</sup> H, <sup>13</sup> C, COSY, HSQC                             | S122 |
|                         | <b>5H</b> | <sup>1</sup> H, <sup>13</sup> C, COSY, HSQC, HMBC, HMBC-GATED           | S126 |
|                         | <b>5I</b> | <sup>1</sup> H, <sup>13</sup> C, COSY, HSQC, HMBC, HMBC-GATED           | S129 |
|                         | <b>5J</b> | <sup>1</sup> H, <sup>13</sup> C, COSY, HSQC                             | S132 |

Phenyl 2-azido-3-*O*-benzyl-2-deoxy-4,6-*O*-di-*tert*-butylsilylidene-1-thio- $\beta$ -D-glucopyranoside (**2**).

$^1\text{H}$  NMR, 400 MHz,  $\text{CDCl}_3$

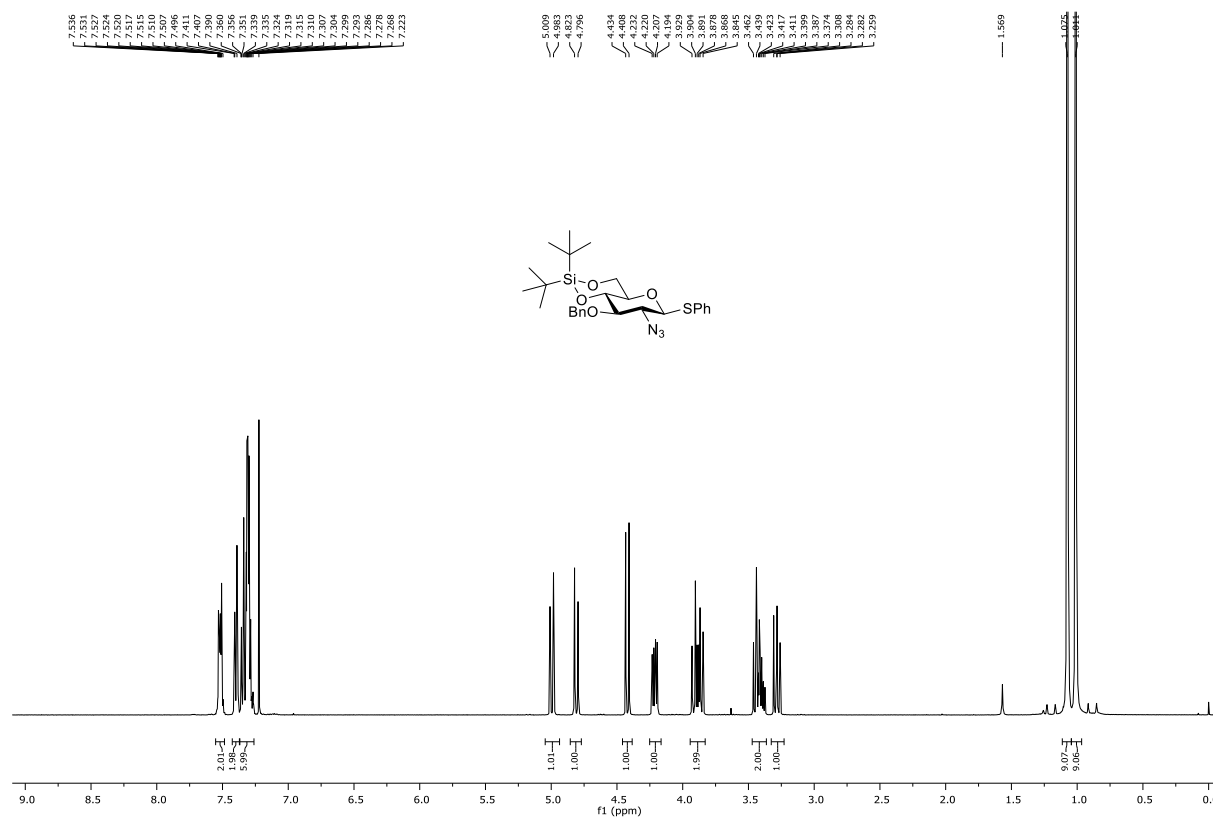

$^{13}\text{C}$ -APT NMR, 101 MHz,  $\text{CDCl}_3$

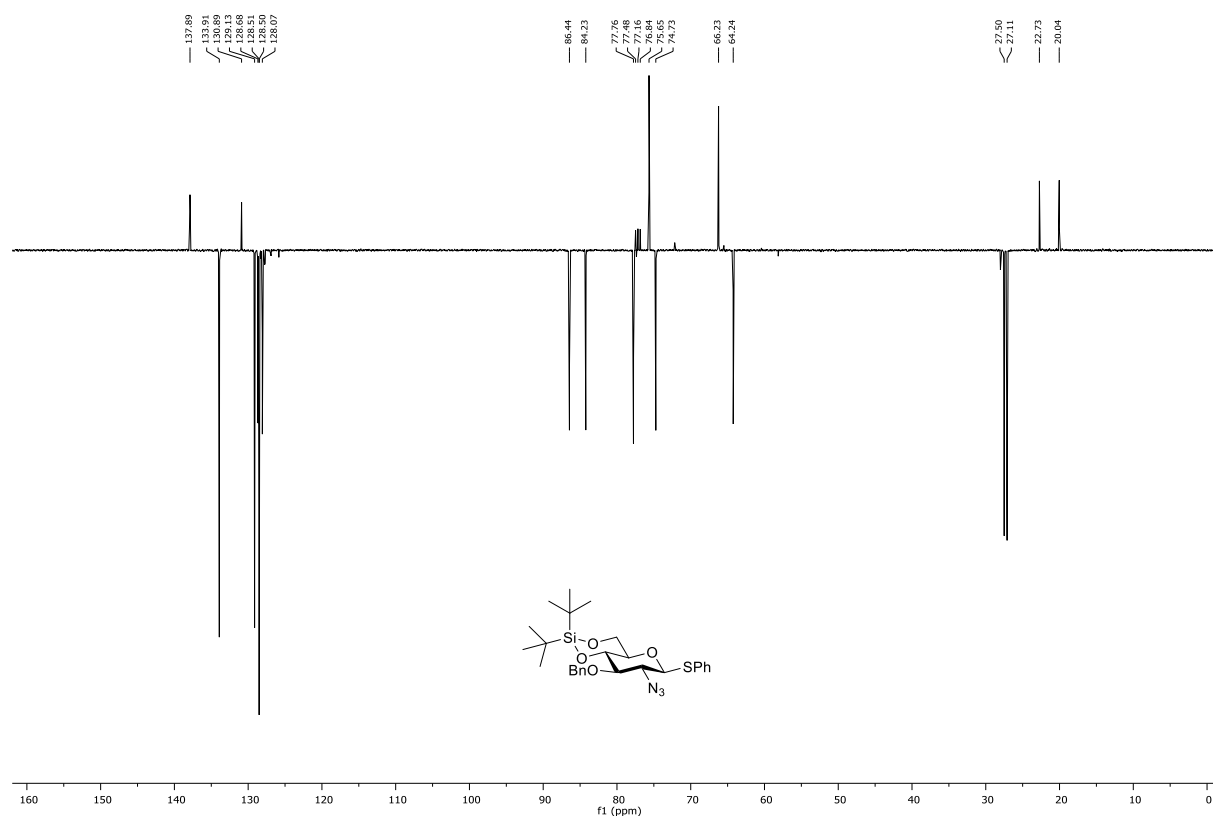

$^1\text{H}$ - $^1\text{H}$  COSY NMR,  $\text{CDCl}_3$

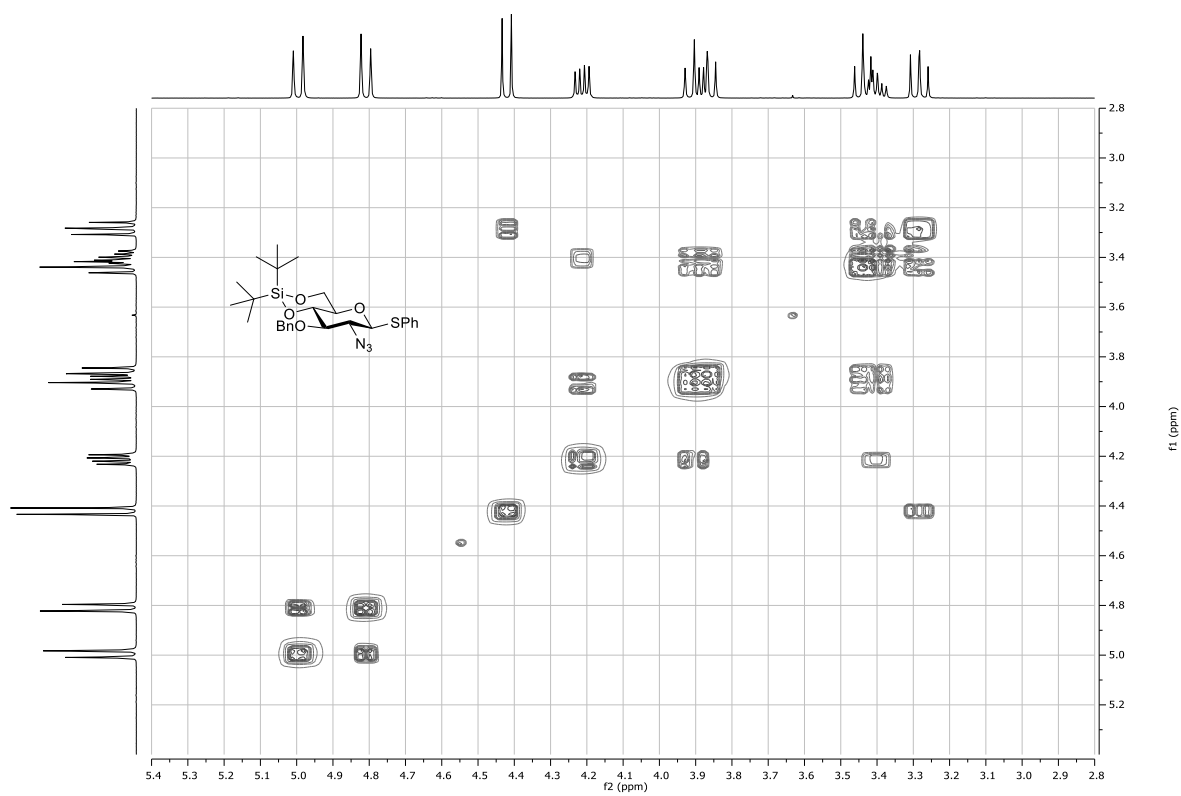

$^1\text{H}$ - $^{13}\text{C}$  HSQC NMR,  $\text{CDCl}_3$

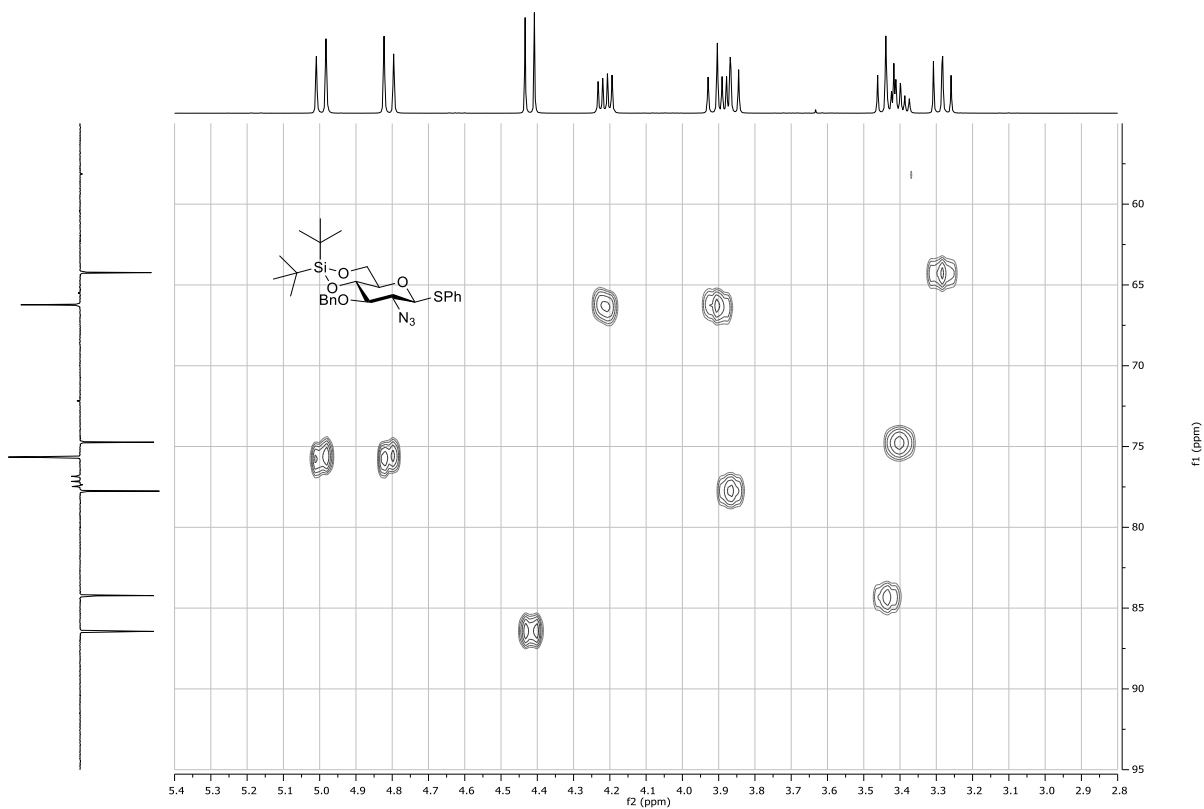



Phenyl 2-(3,5-dinitro-4-pyridone)-3-*O*-benzyl-4,6-*O*-benzylidene-2-deoxy-1-thio-β-D-glucopyranoside (**5**).

<sup>1</sup>H NMR, 400 MHz, CDCl<sub>3</sub>

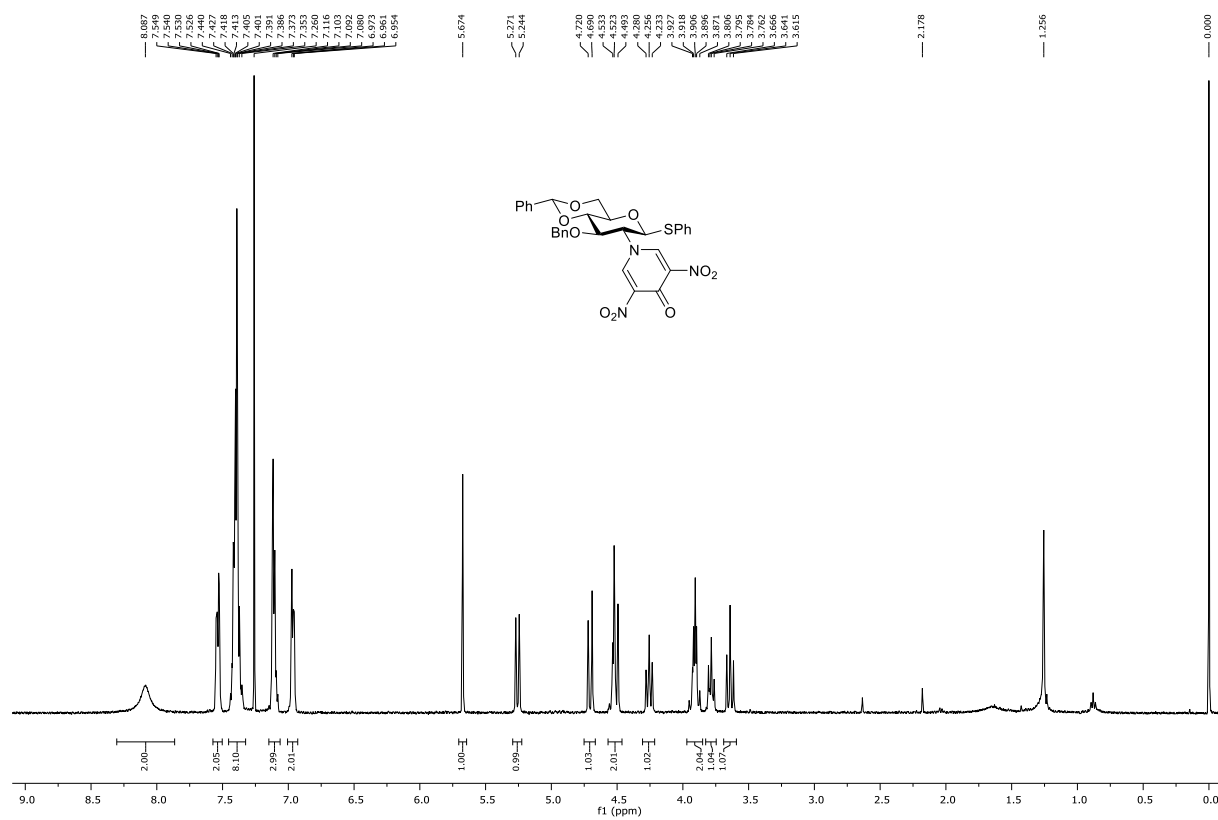

<sup>13</sup>C-APT NMR, 101 MHz, CDCl<sub>3</sub>

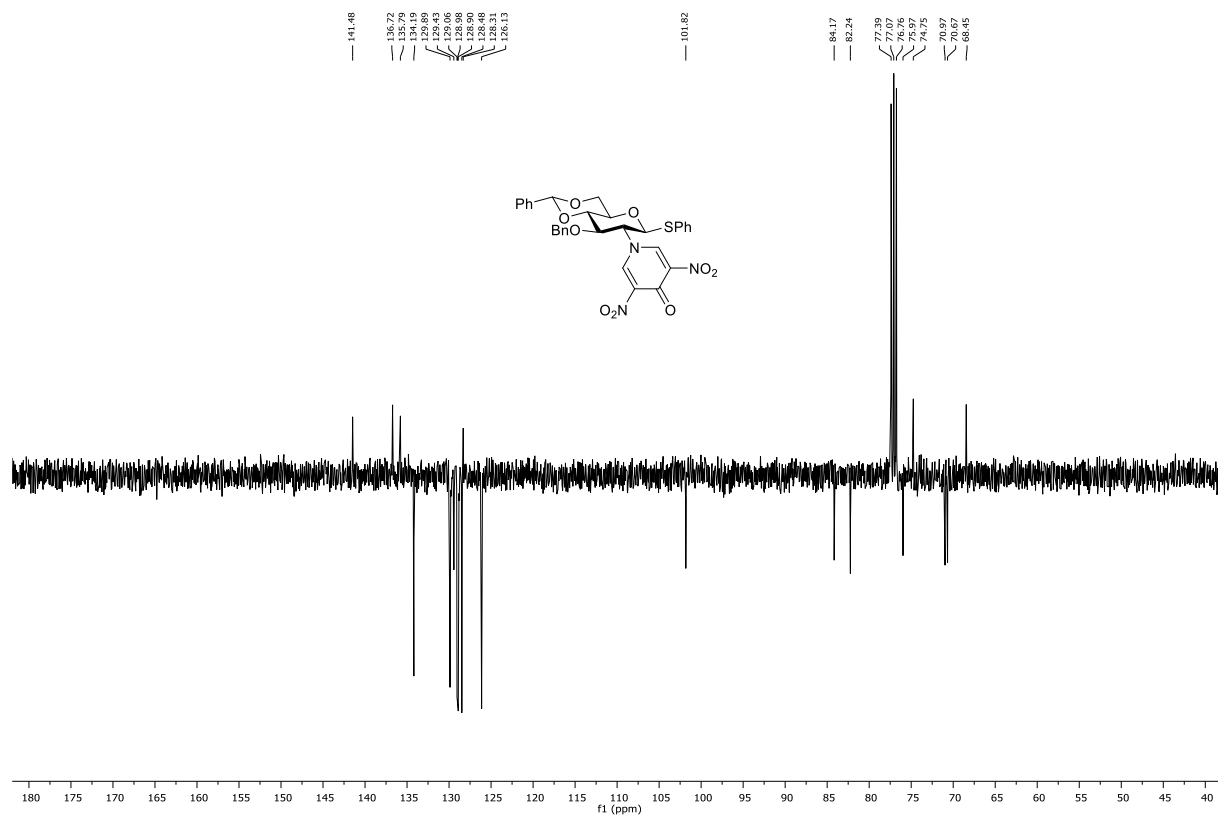

$^1\text{H}$ - $^1\text{H}$  COSY NMR,  $\text{CDCl}_3$

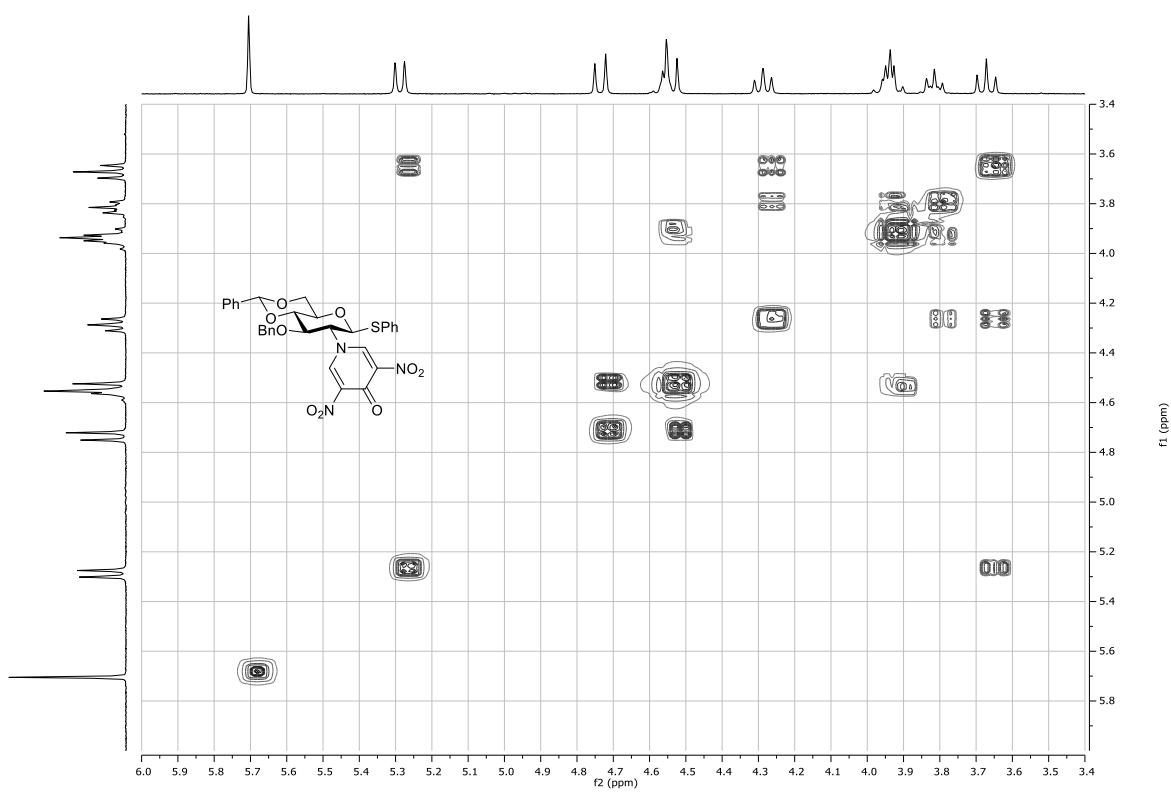

$^1\text{H}$ - $^{13}\text{C}$  HSQC NMR,  $\text{CDCl}_3$

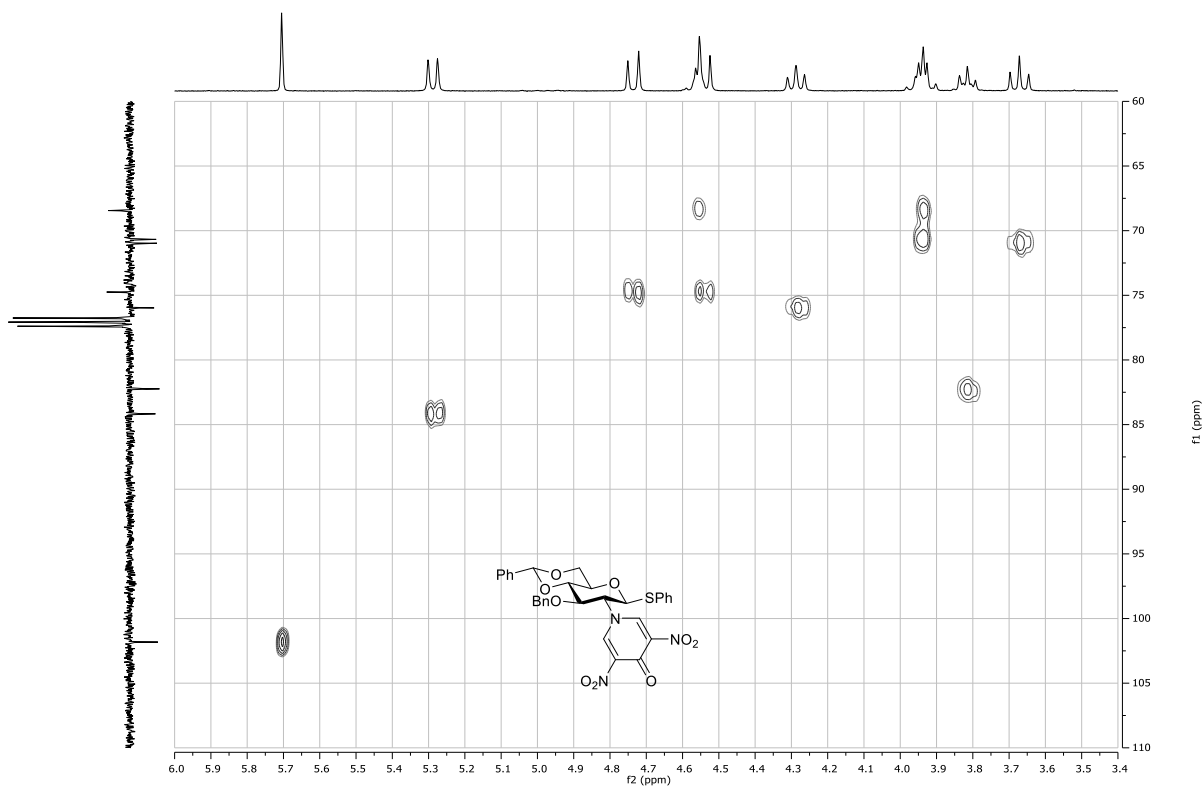

<sup>1</sup>H NMR, 400 MHz, acetone-*d*<sub>6</sub>

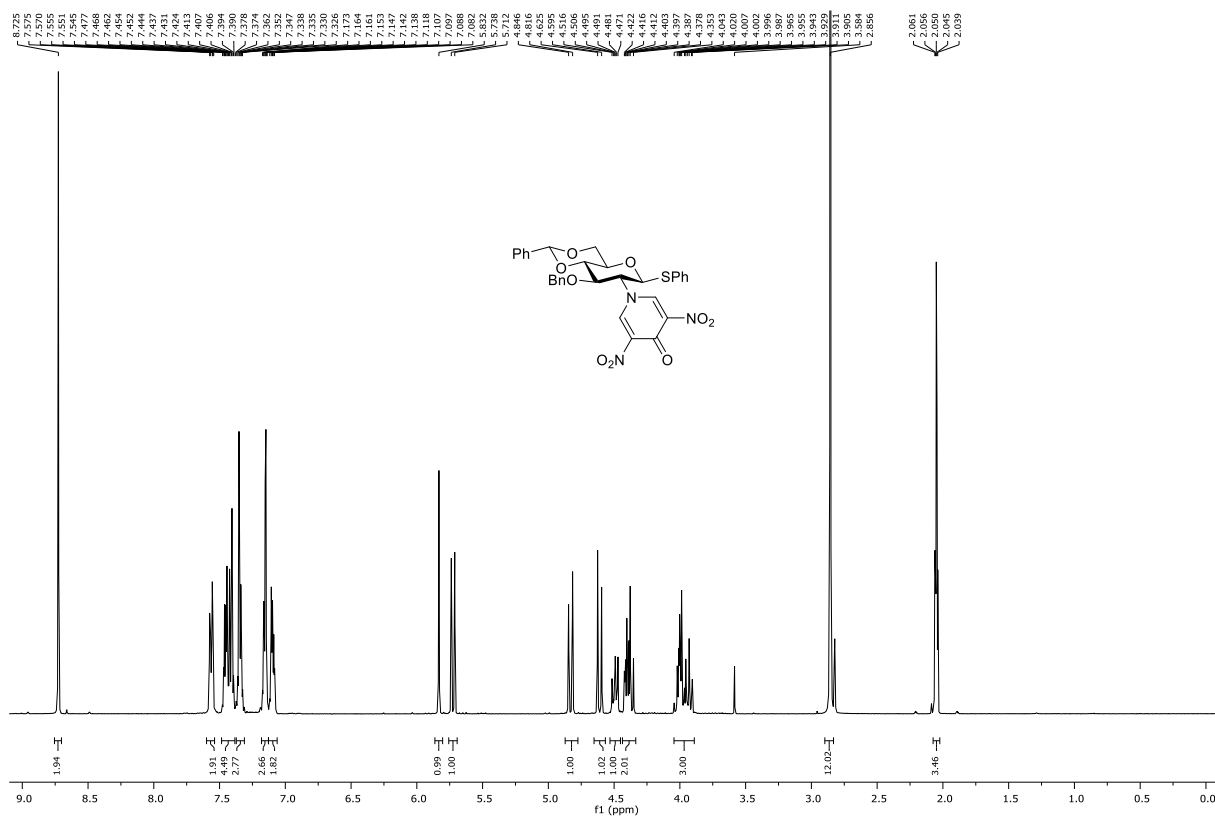

<sup>13</sup>C-APT NMR, 101 MHz, acetone-*d*<sub>6</sub>

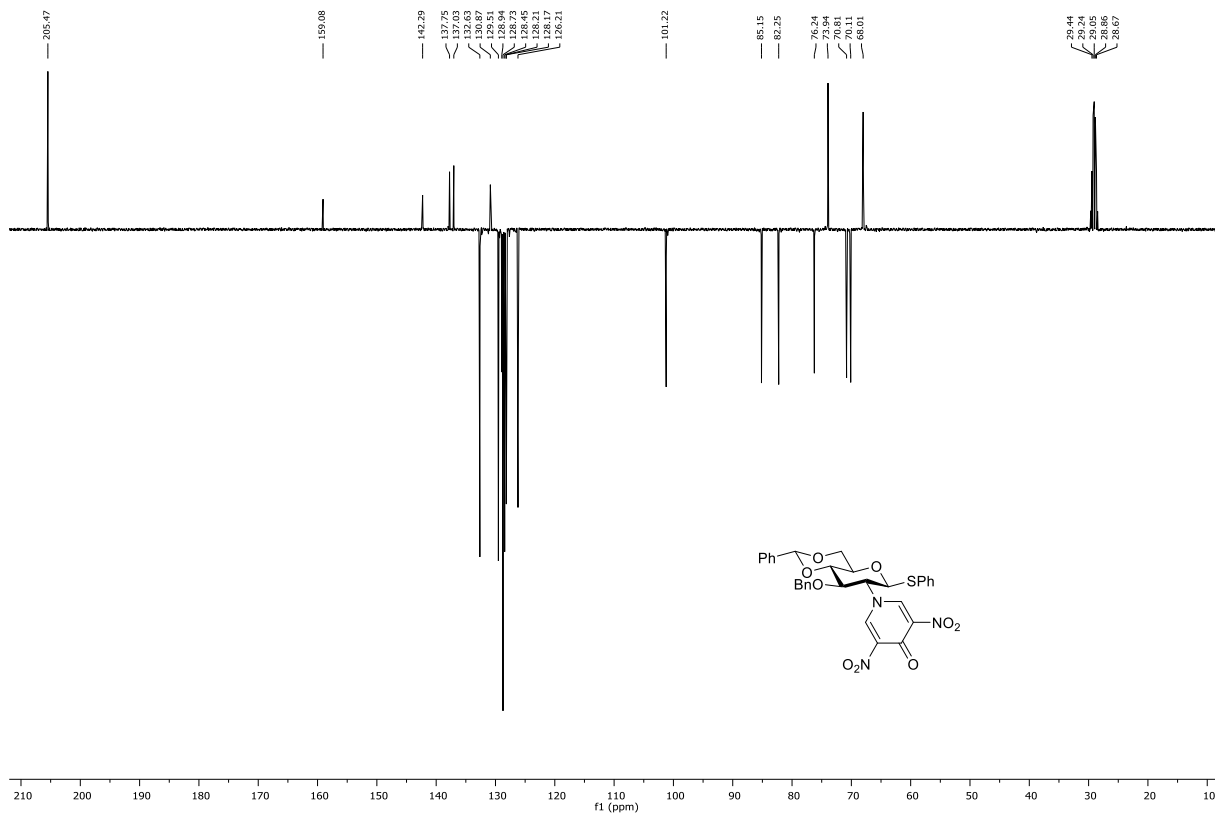

$^1\text{H}$ - $^1\text{H}$  COSY NMR, acetone- $d_6$

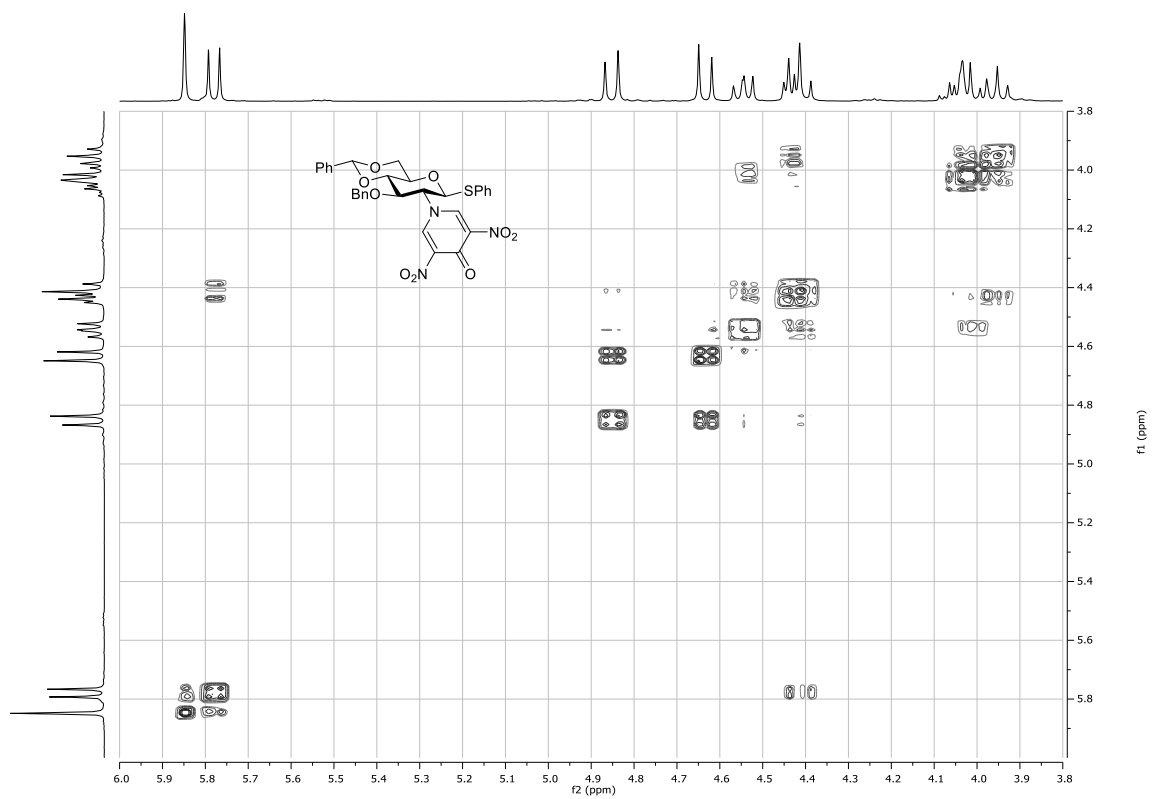

$^1\text{H}$ - $^{13}\text{C}$  HSQC NMR, acetone- $d_6$

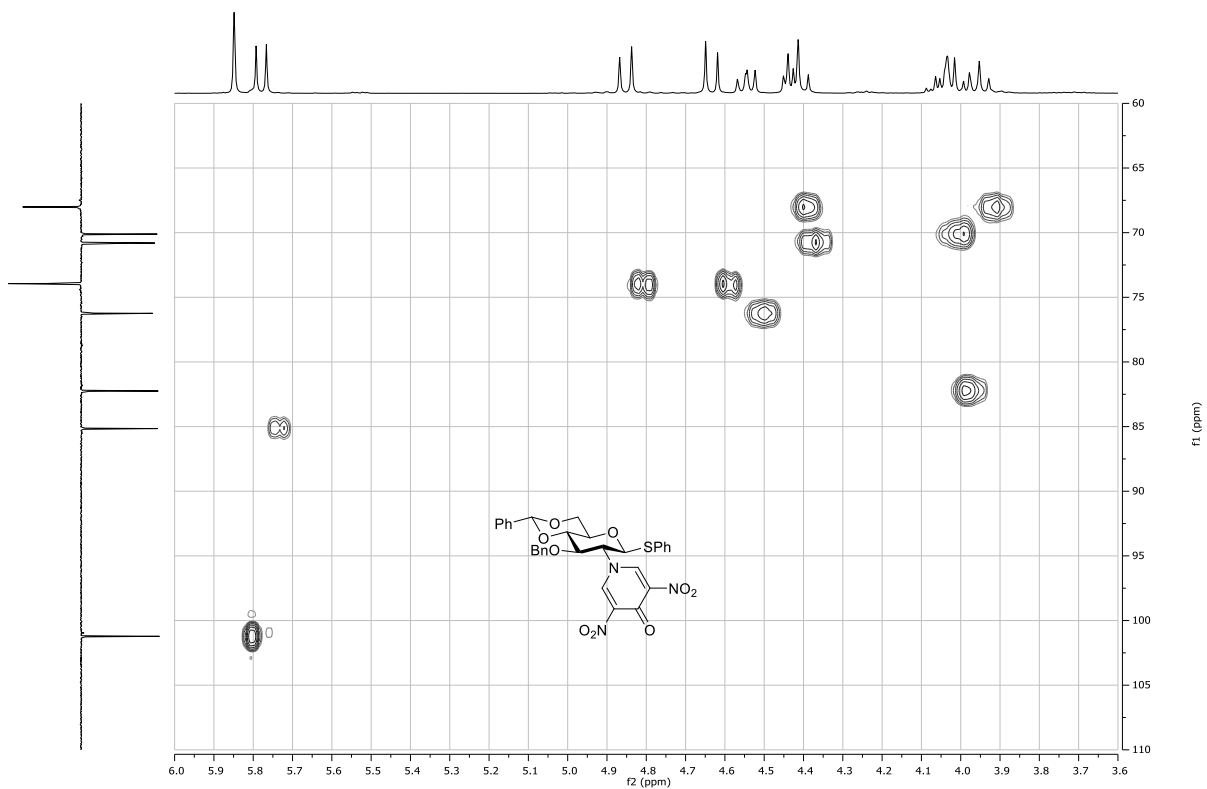

Phenyl 2-azido-2-deoxy-4,6-*O*-*tert*-butylsilylidene-1-thio-β-D-glucopyranoside (**14**).

<sup>1</sup>H NMR, 400 MHz, CDCl<sub>3</sub>

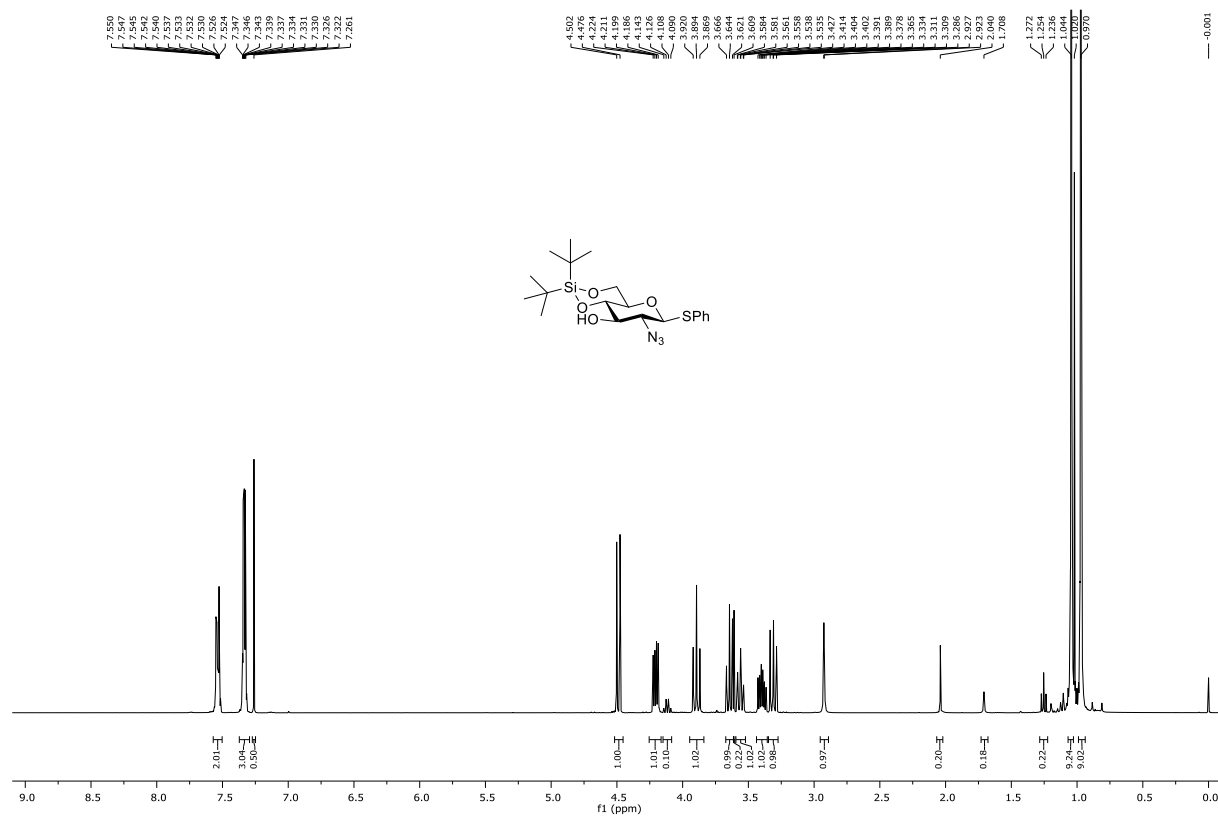

<sup>13</sup>C-APT NMR, 101 MHz, CDCl<sub>3</sub>

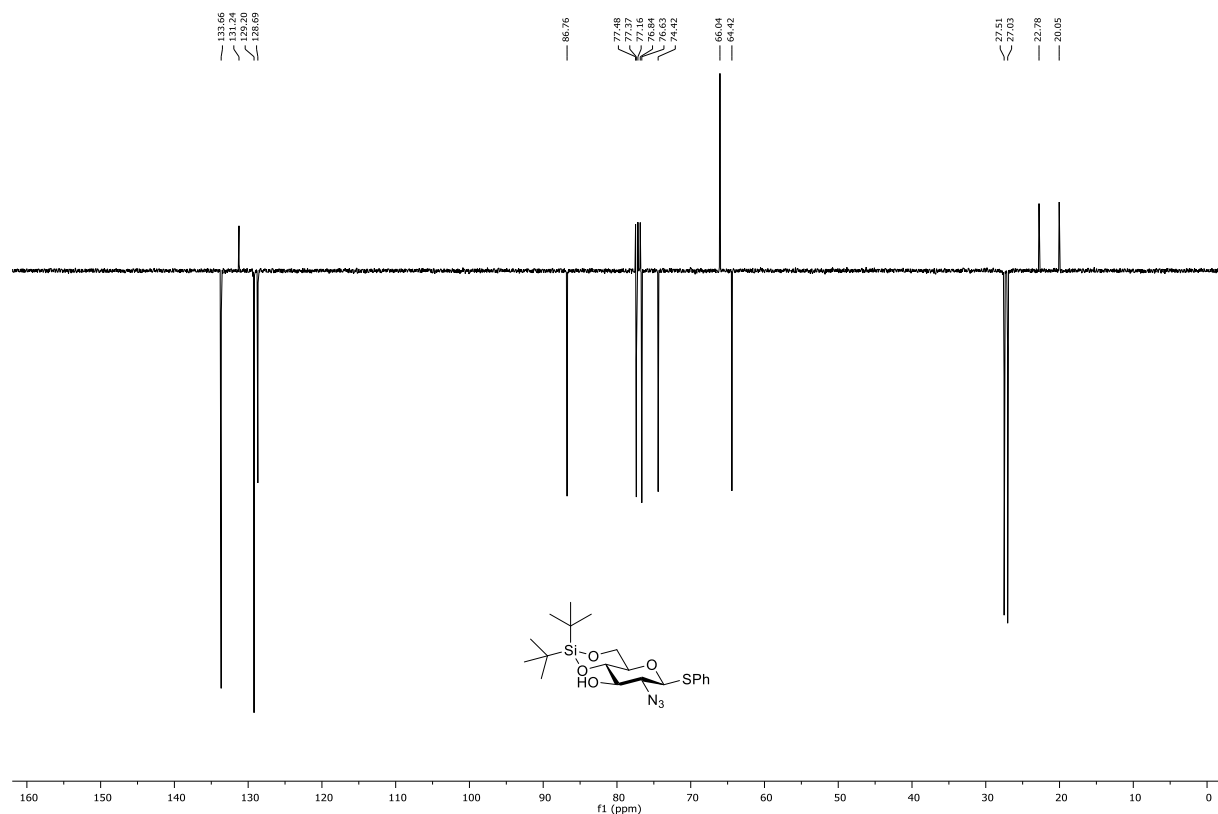

$^1\text{H}$ - $^1\text{H}$  COSY NMR,  $\text{CDCl}_3$

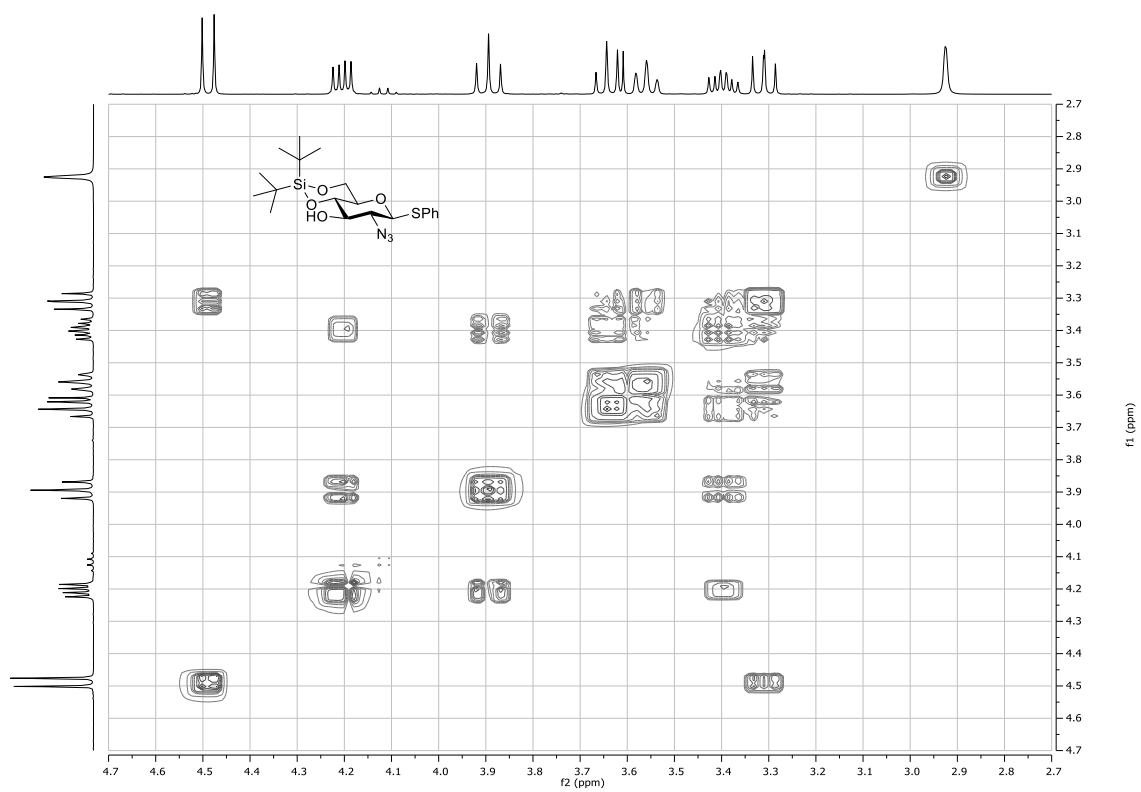

$^1\text{H}$ - $^{13}\text{C}$  HSQC NMR,  $\text{CDCl}_3$

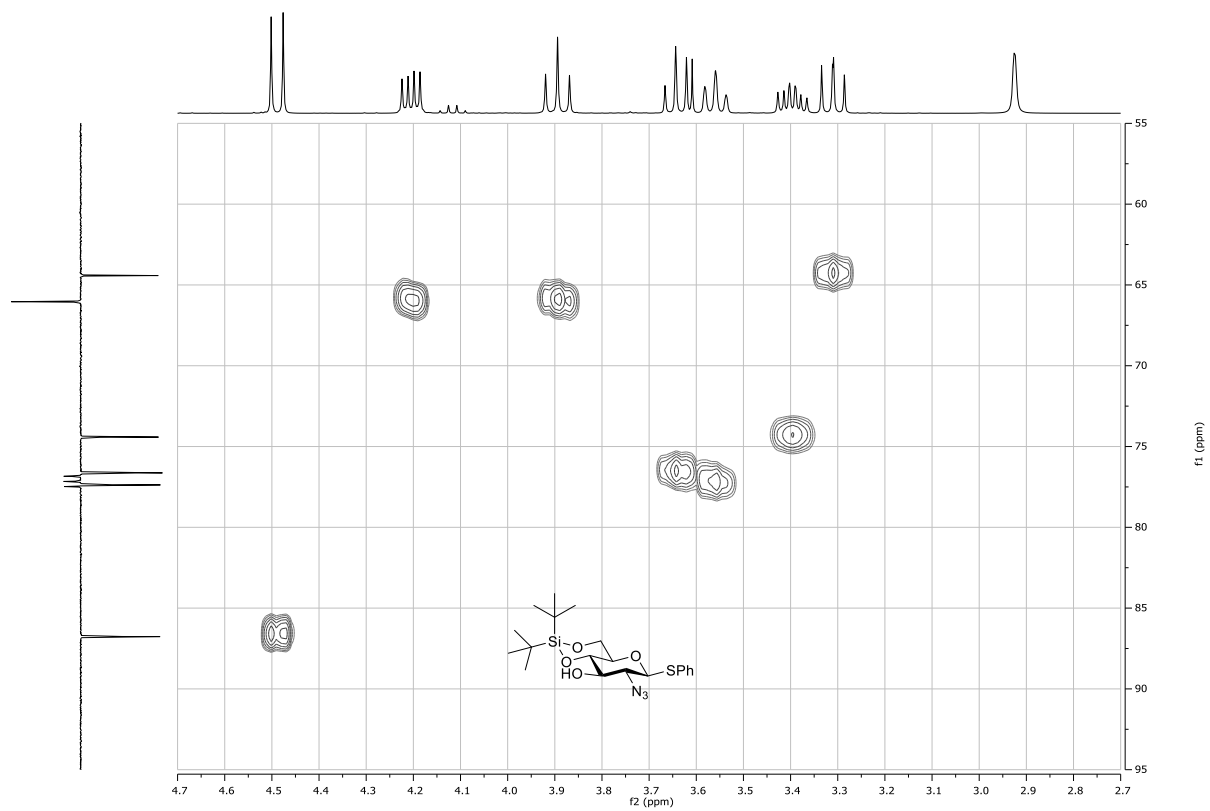

Phenyl 2-amino-3-*O*-benzyl-4,6-*O*-benzylidene-2-deoxy-1-thio- $\beta$ -D-glucopyranoside (**16**).

$^1\text{H}$  NMR, 400 MHz,  $\text{CDCl}_3$

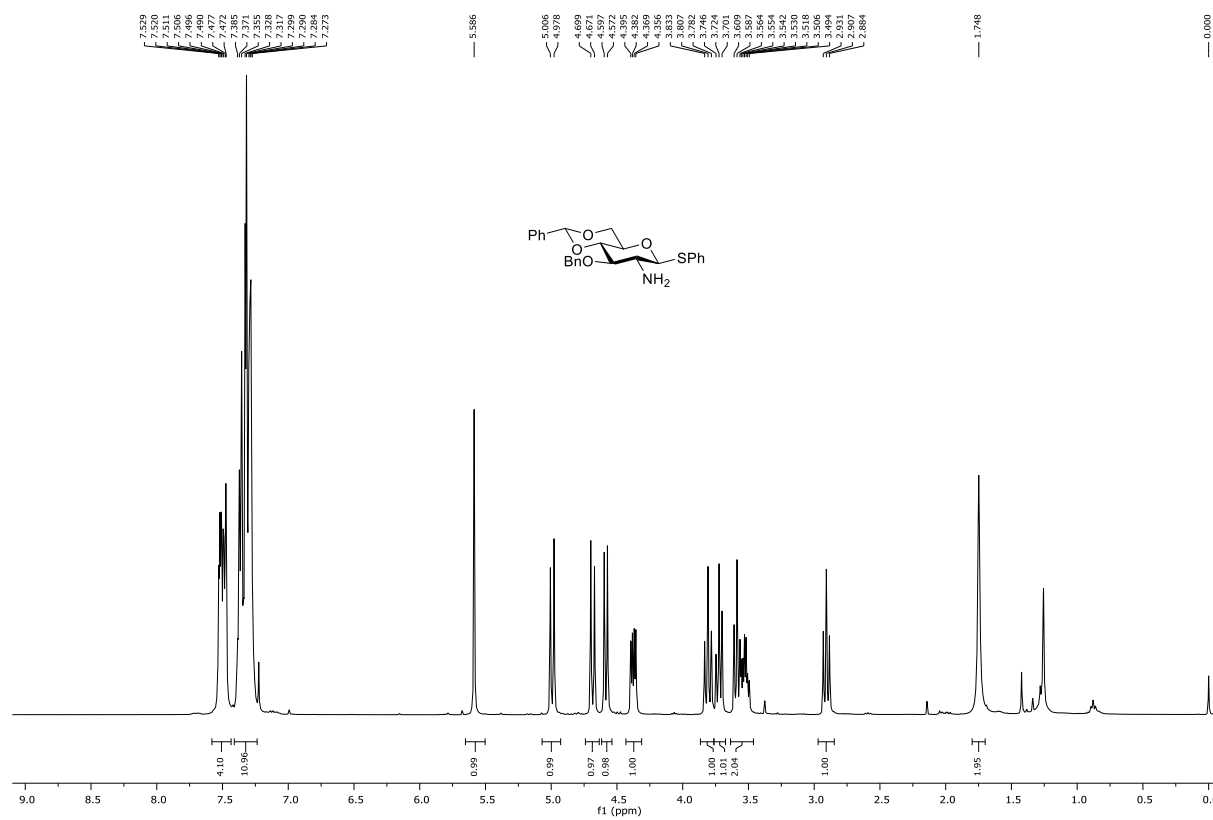

$^{13}\text{C}$ -APT NMR, 101 MHz,  $\text{CDCl}_3$

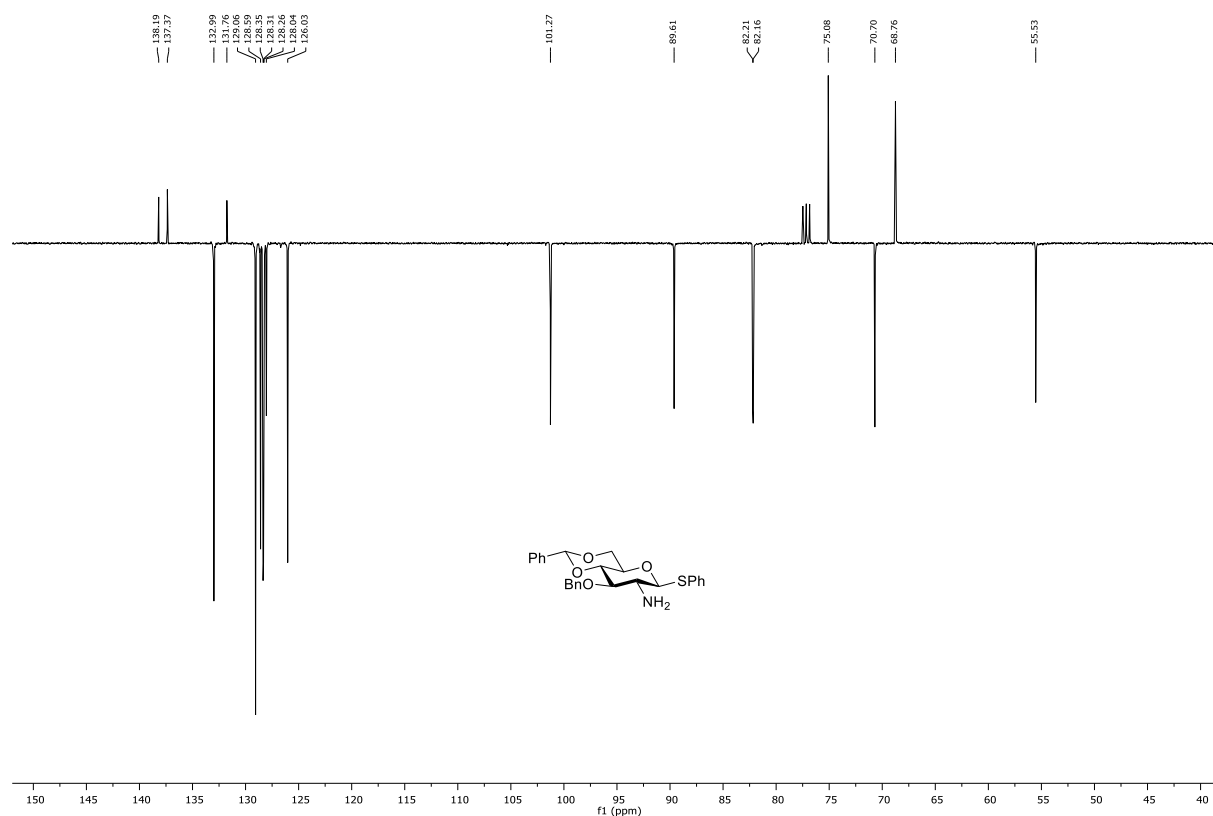

$^1\text{H}$ - $^1\text{H}$  COSY NMR,  $\text{CDCl}_3$

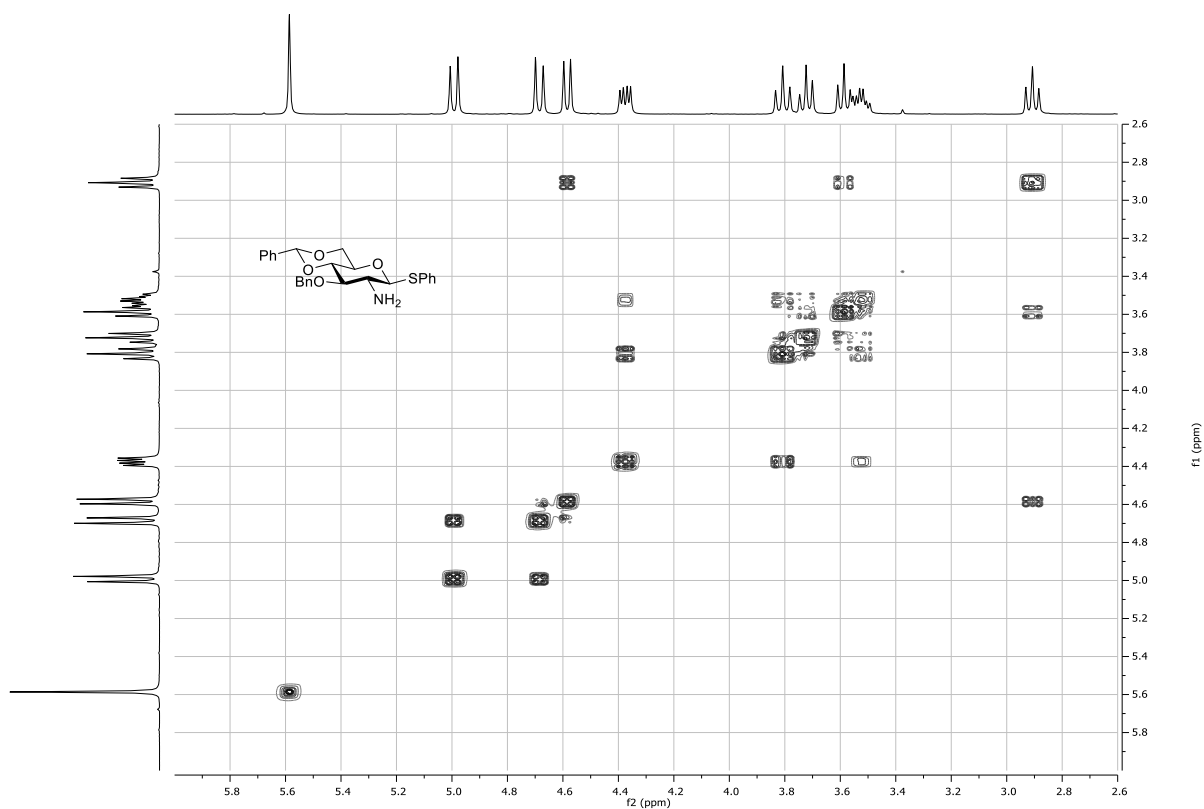

$^1\text{H}$ - $^{13}\text{C}$  HSQC NMR,  $\text{CDCl}_3$

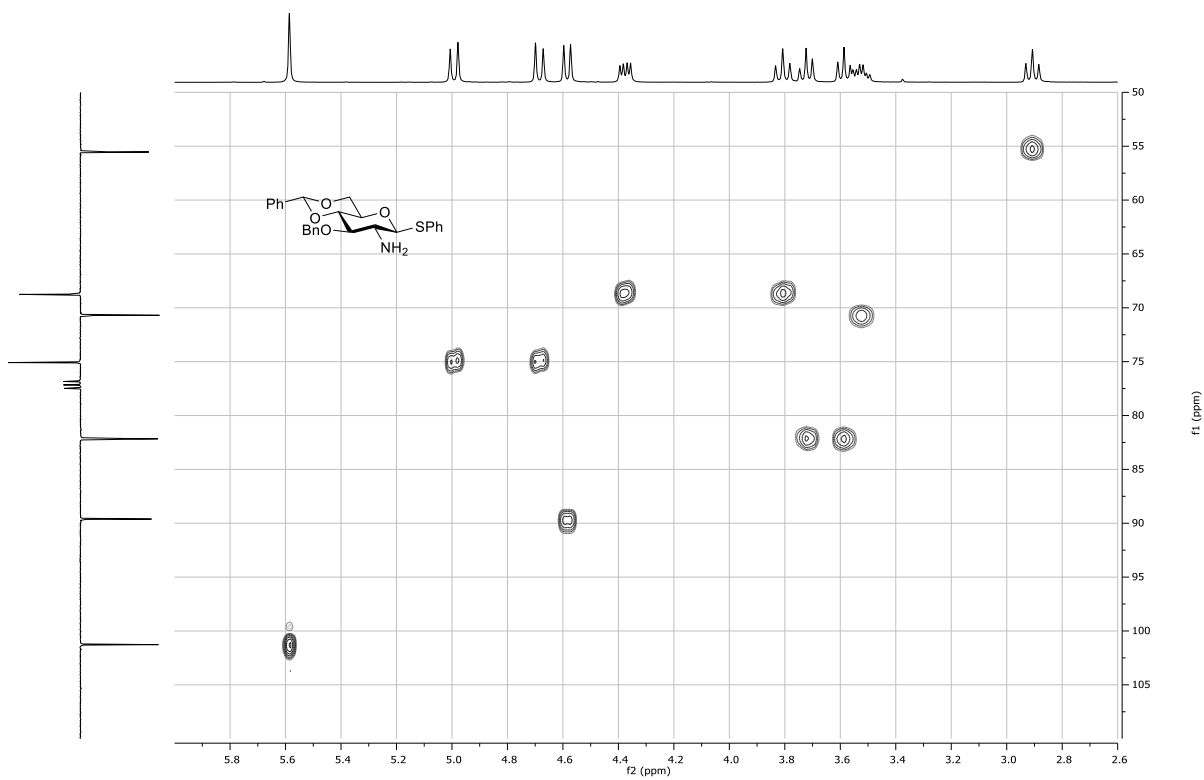



3-*O*-benzyl-4,6-*O*-benzylidene-2-deoxy-2-(3,5-dinitro-4-pyridone)-D-glucal (**24**).

<sup>1</sup>H NMR, 500 MHz, acetone-*d*<sub>6</sub>

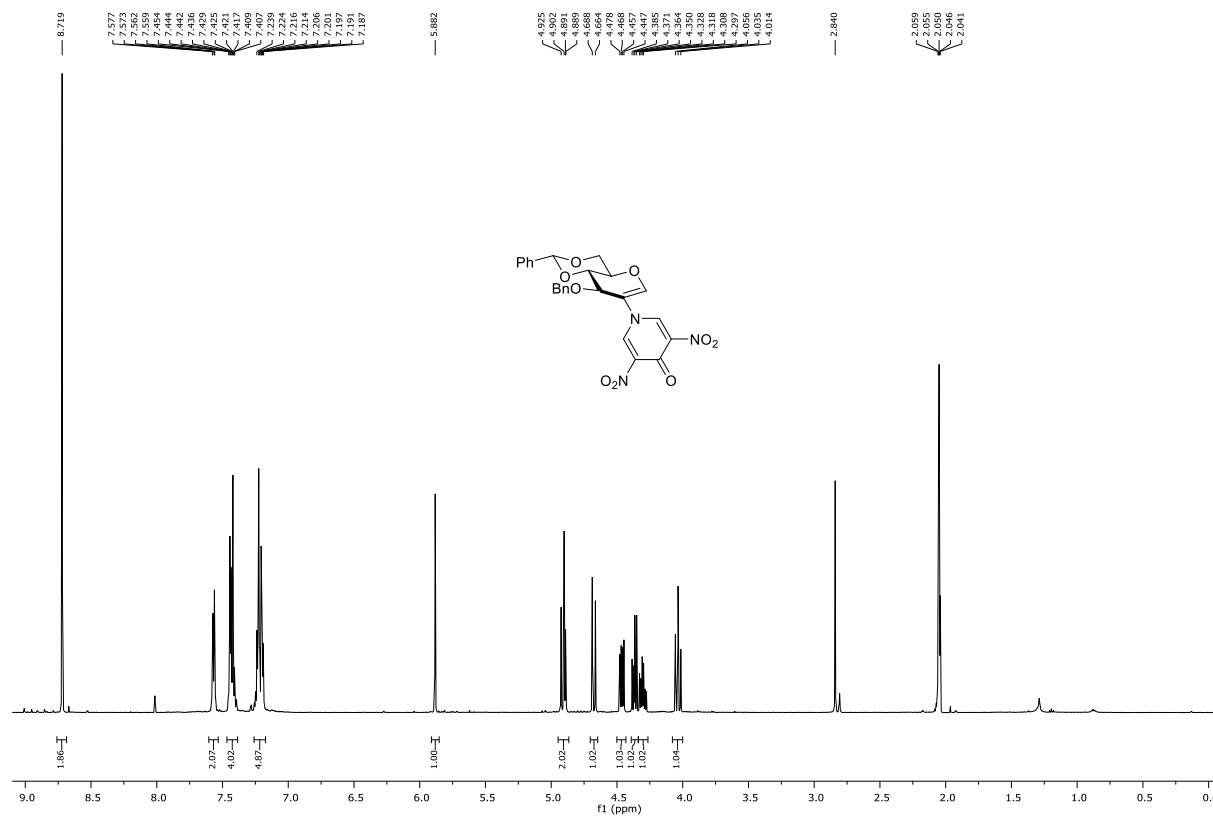

<sup>13</sup>C-APT NMR, 126 MHz, acetone-*d*<sub>6</sub>

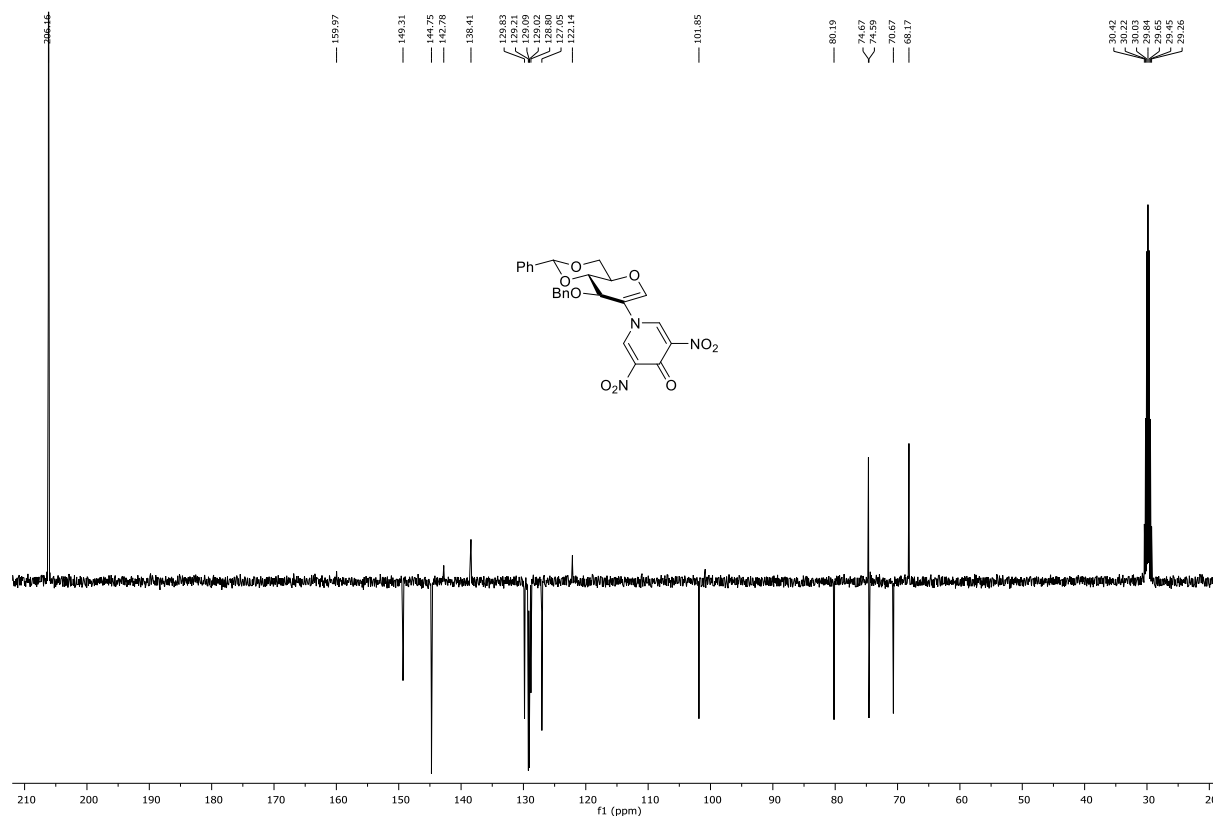

$^1\text{H}$ - $^1\text{H}$  COSY NMR, acetone- $d_6$

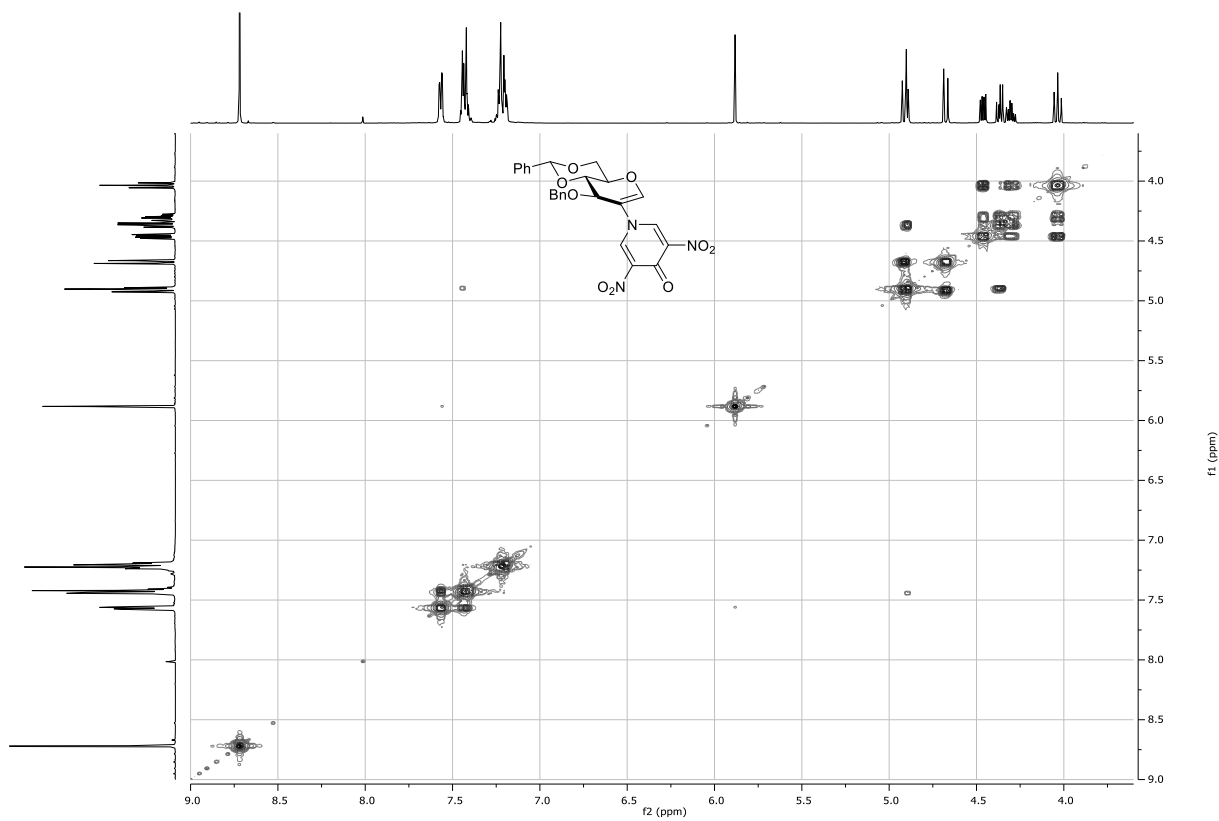

$^1\text{H}$ - $^{13}\text{C}$  HSQC NMR, acetone- $d_6$

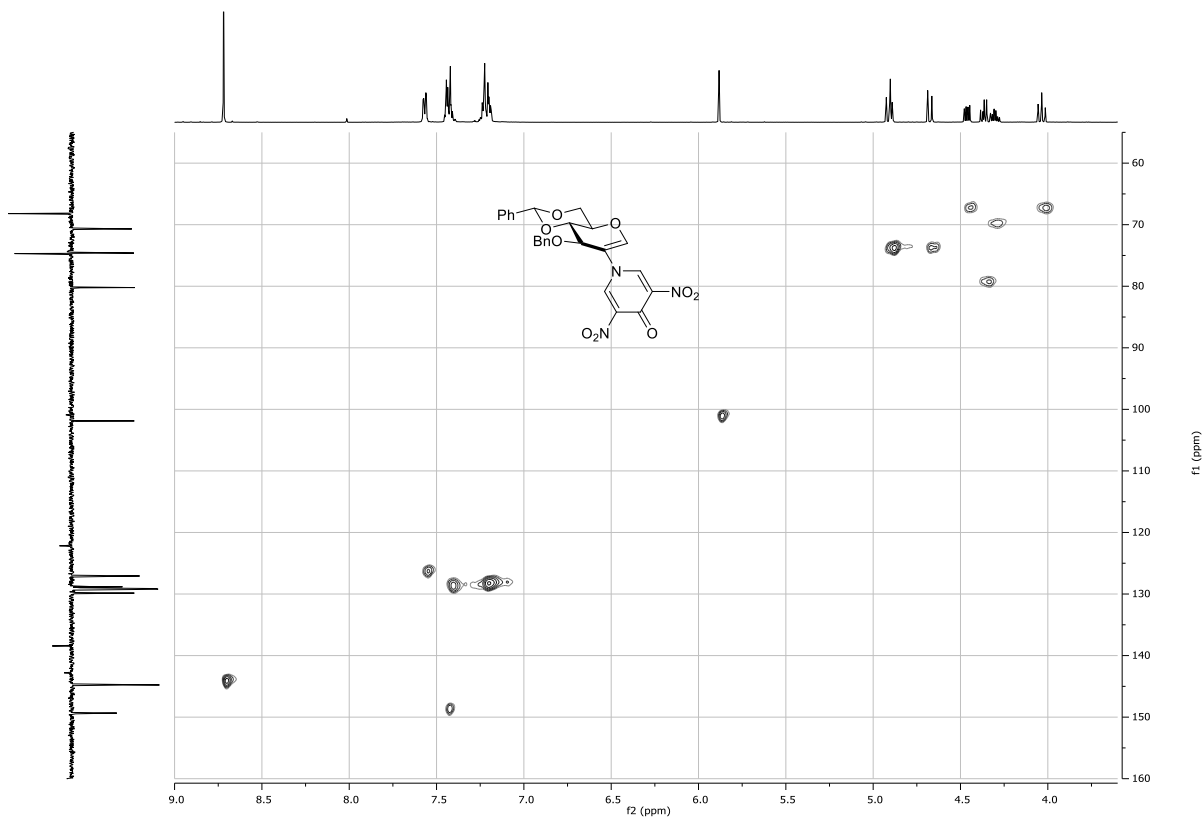

Trifluoromethanesulfonyl 2,3-di-*O*-benzyl-4,6-*O*-benzylidene- $\alpha$ -D-glucopyranoside (19).

$^1\text{H}$  NMR, 500 MHz,  $\text{CD}_2\text{Cl}_2$

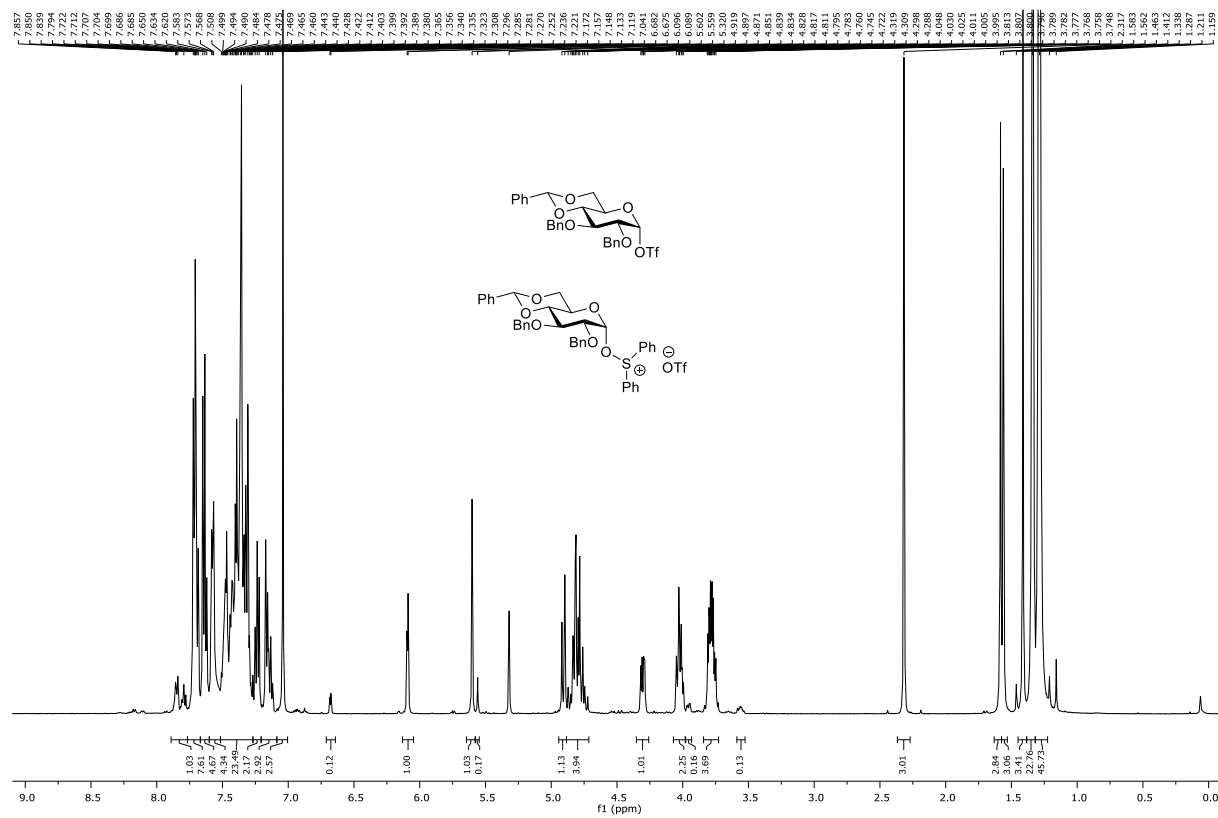

$^{13}\text{C}$ -APT NMR, 126 MHz,  $\text{CD}_2\text{Cl}_2$

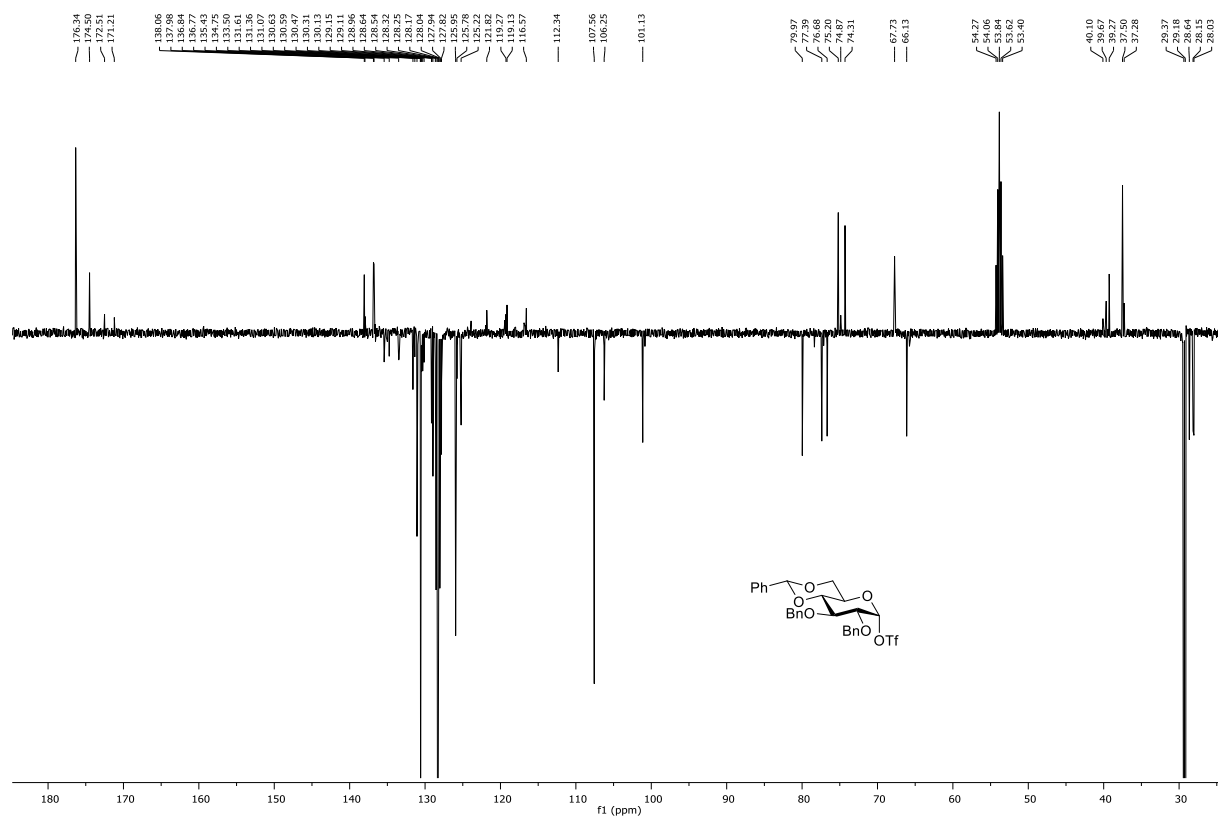

$^{19}\text{F}$  NMR, 470 MHz,  $\text{CD}_2\text{Cl}_2$

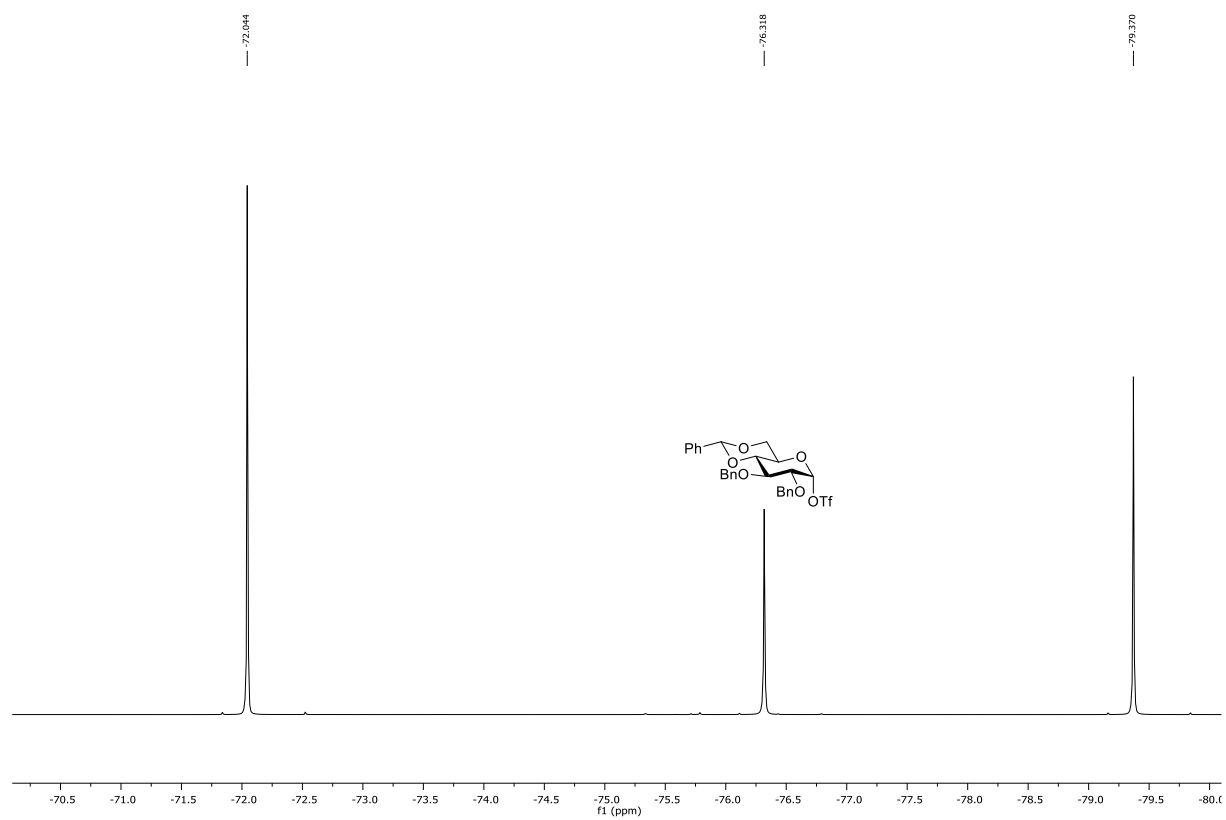

$^1\text{H}$ - $^1\text{H}$  COSY NMR,  $\text{CD}_2\text{Cl}_2$

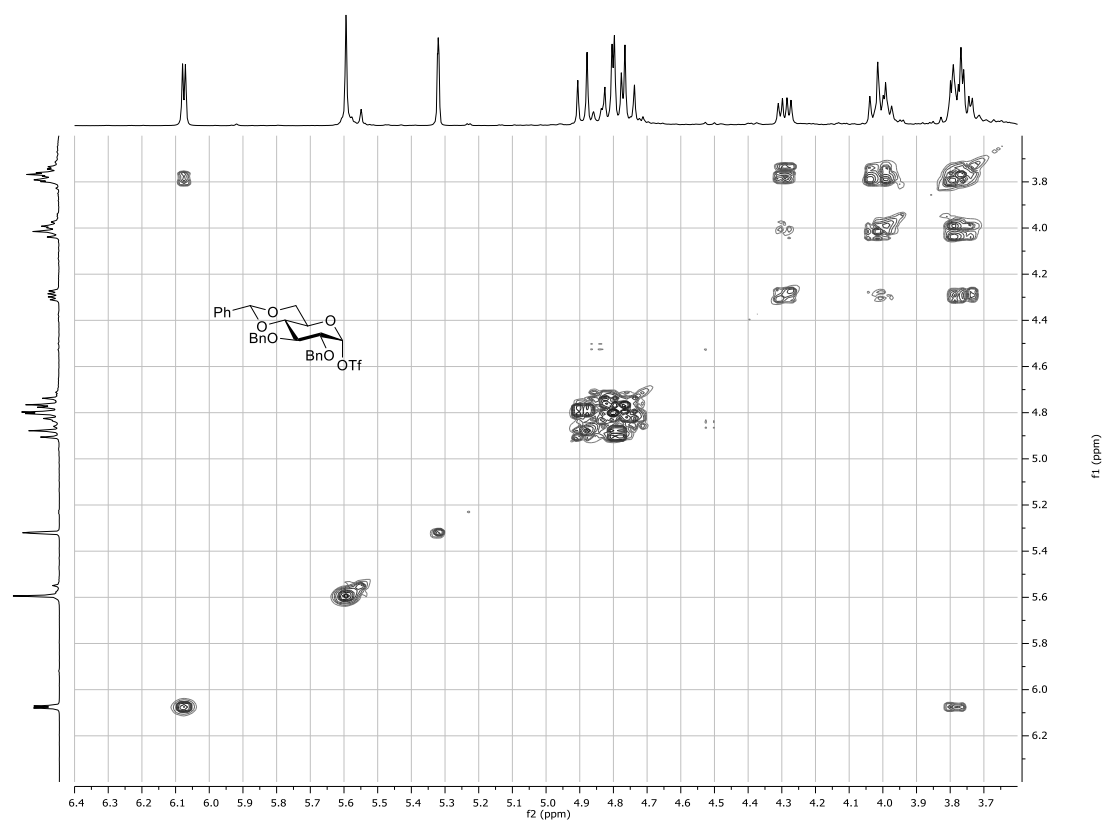

$^1\text{H}$ - $^{13}\text{C}$  HSQC NMR,  $\text{CD}_2\text{Cl}_2$

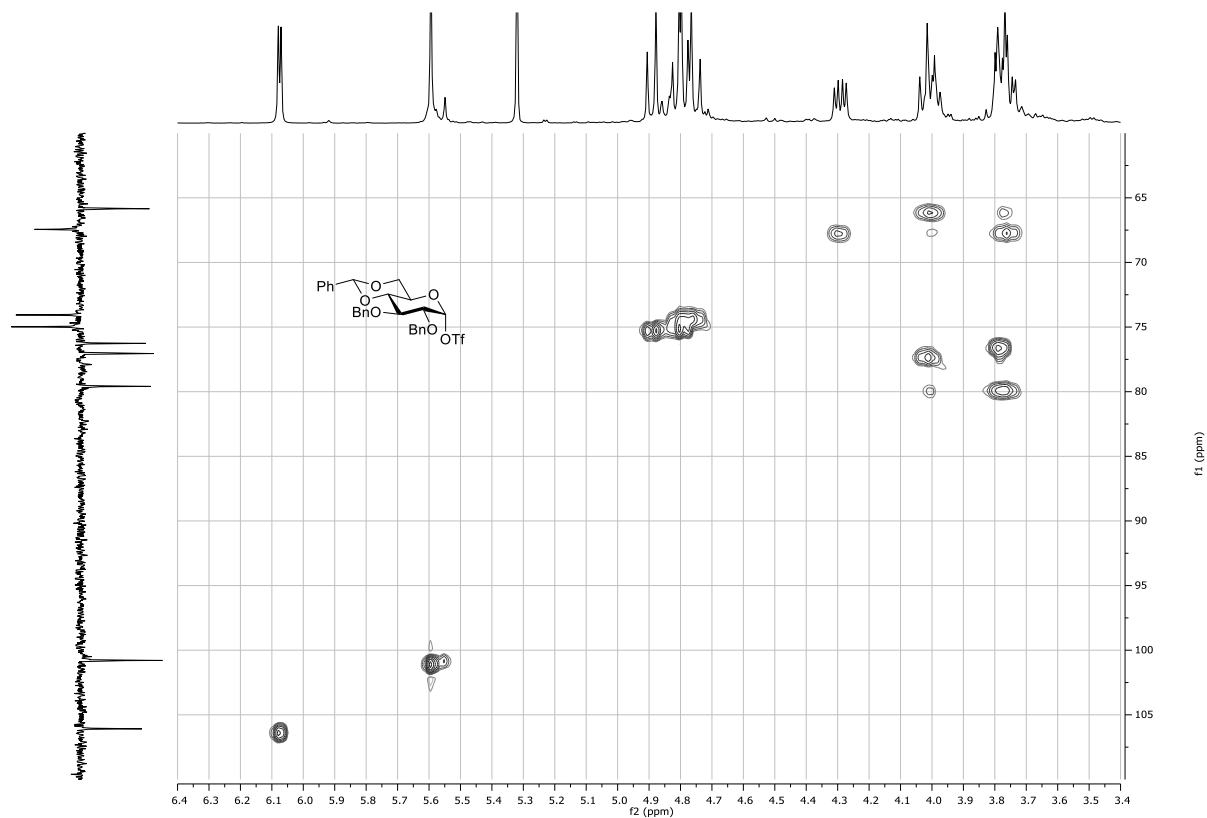

Decomposition study  $^1\text{H}$  NMR, 500 MHz,  $\text{CD}_2\text{Cl}_2$

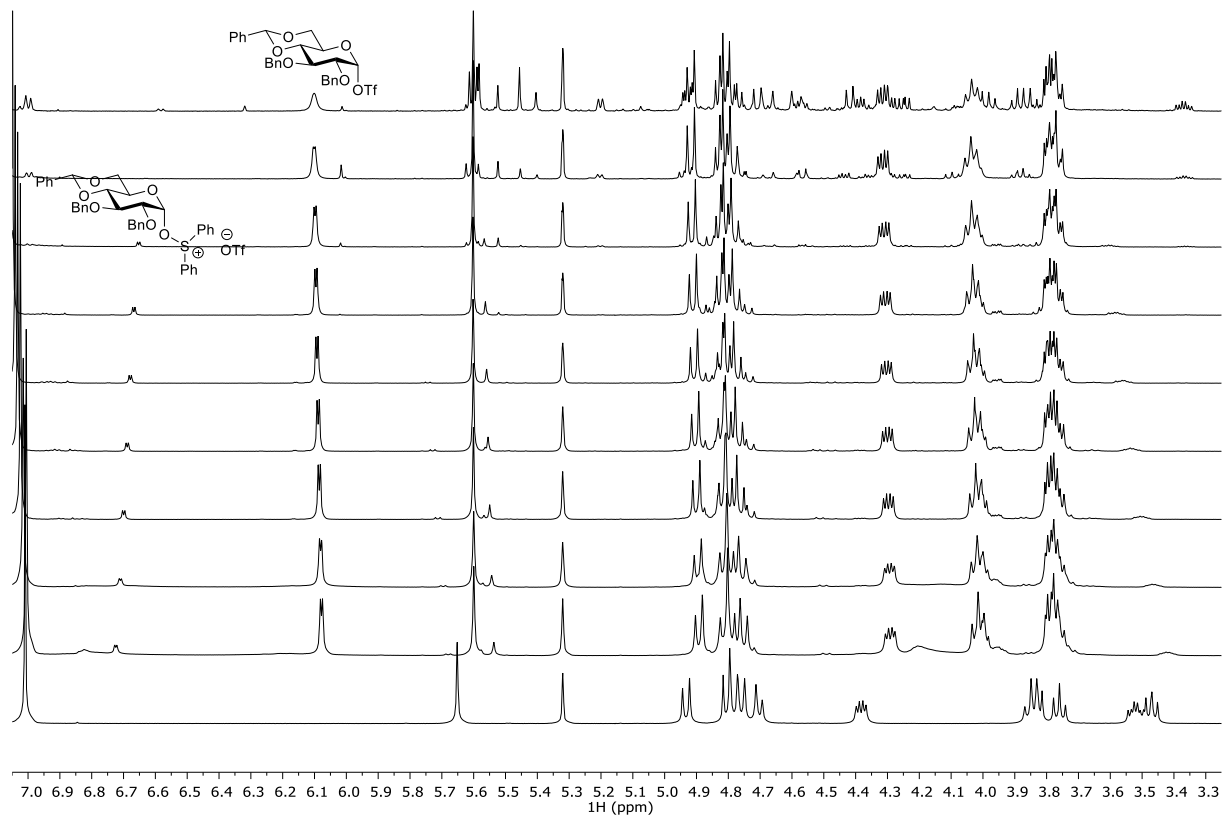

Decomposition study <sup>1</sup>H NMR, 500 MHz, CD<sub>2</sub>Cl<sub>2</sub> [4.0 eq. Ph<sub>2</sub>SO]

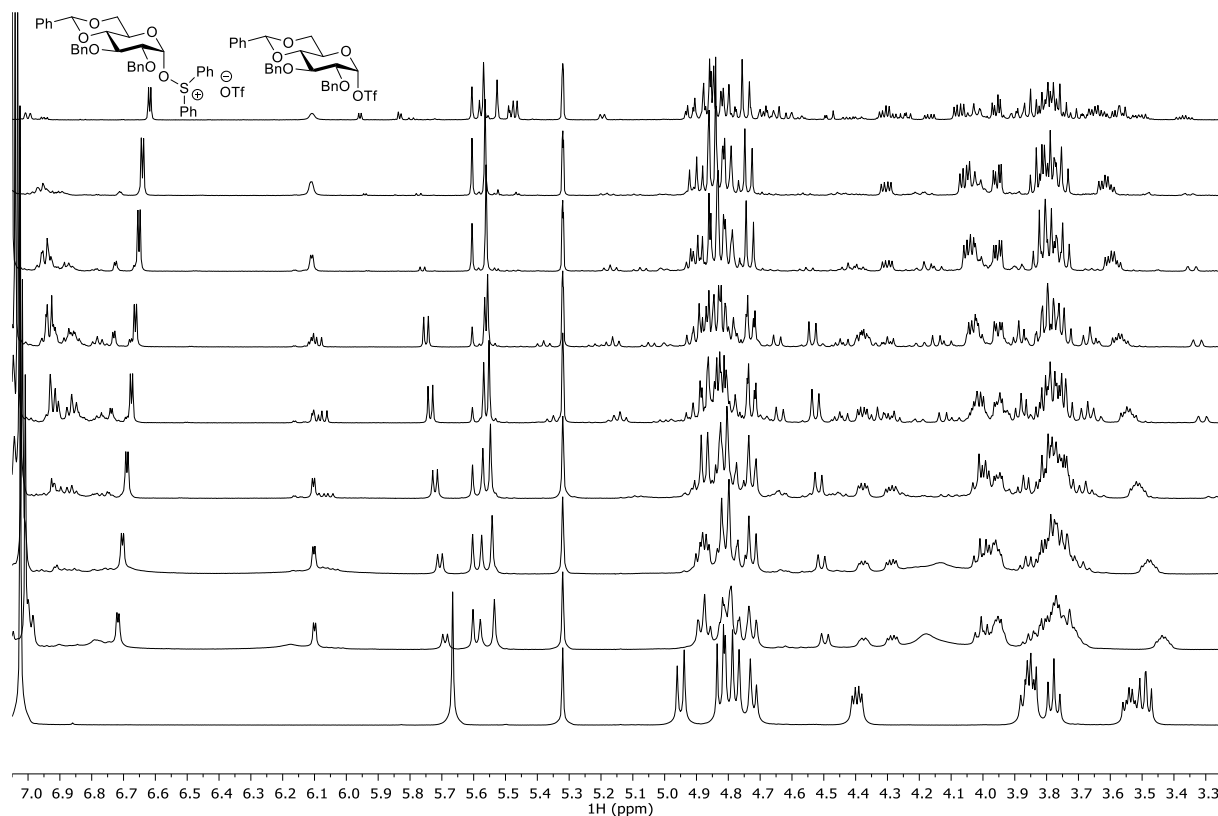

Trifluoromethanesulfonyl 2-azido-3-*O*-benzyl-2-deoxy-4,6-*O*-di-*tert*-butylsilylidene- $\alpha$ -D-glucopyranoside (**20**).

<sup>1</sup>H NMR, 400 MHz, CD<sub>2</sub>Cl<sub>2</sub>

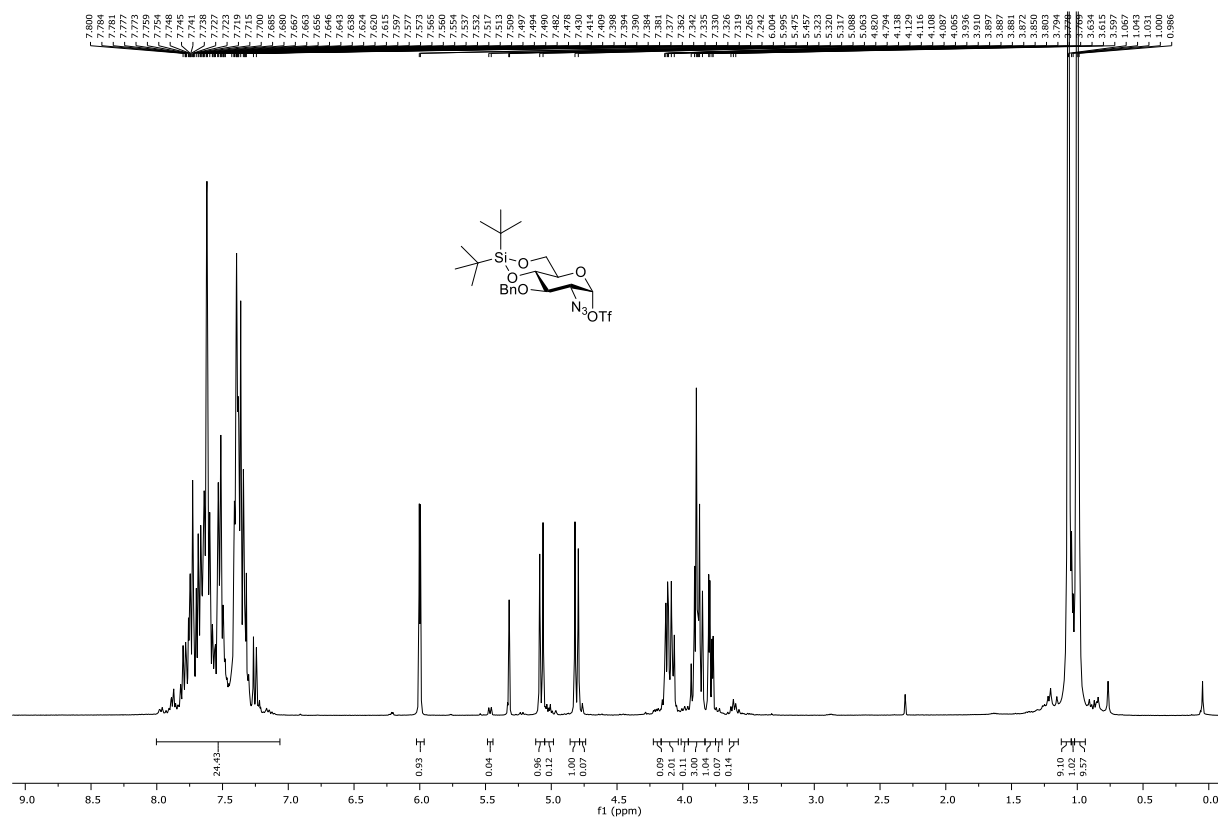

$^{13}\text{C}$ -APT NMR, 101 MHz,  $\text{CD}_2\text{Cl}_2$

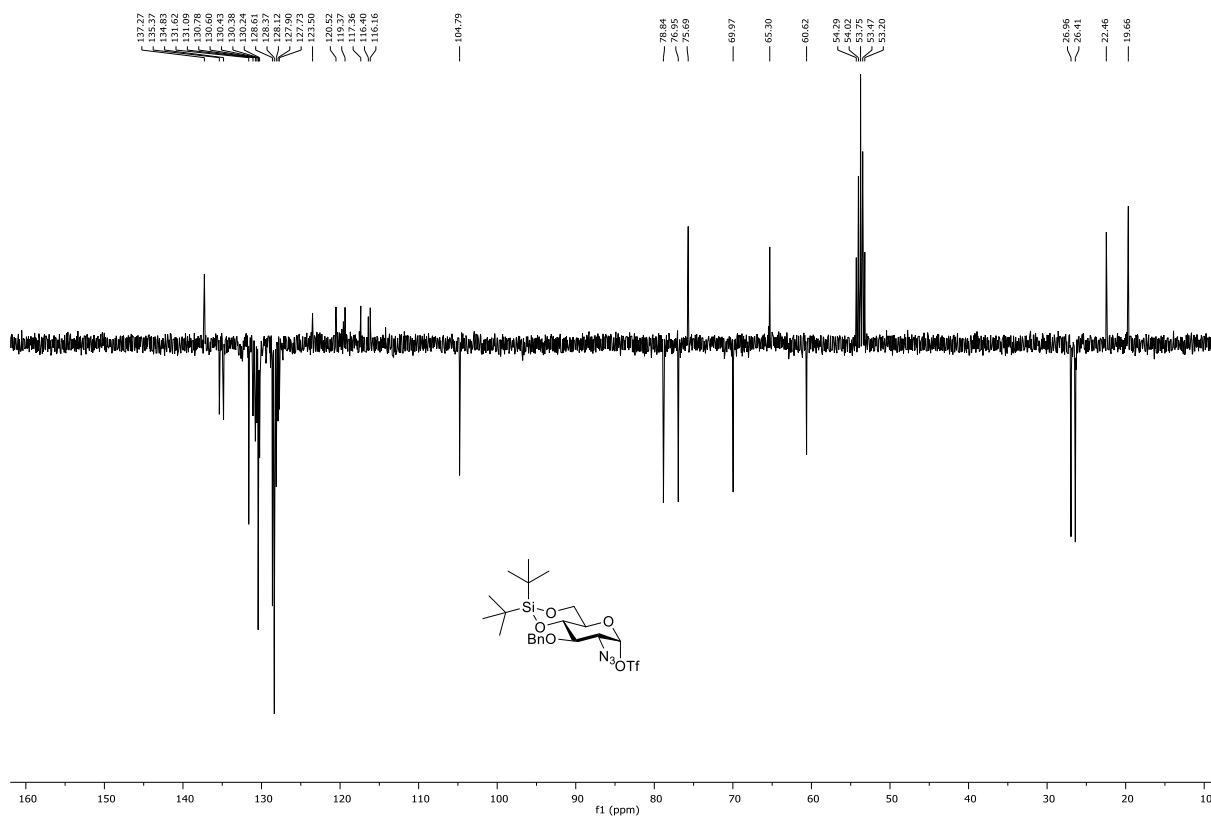

$^1\text{H}$ - $^1\text{H}$  COSY NMR,  $\text{CD}_2\text{Cl}_2$

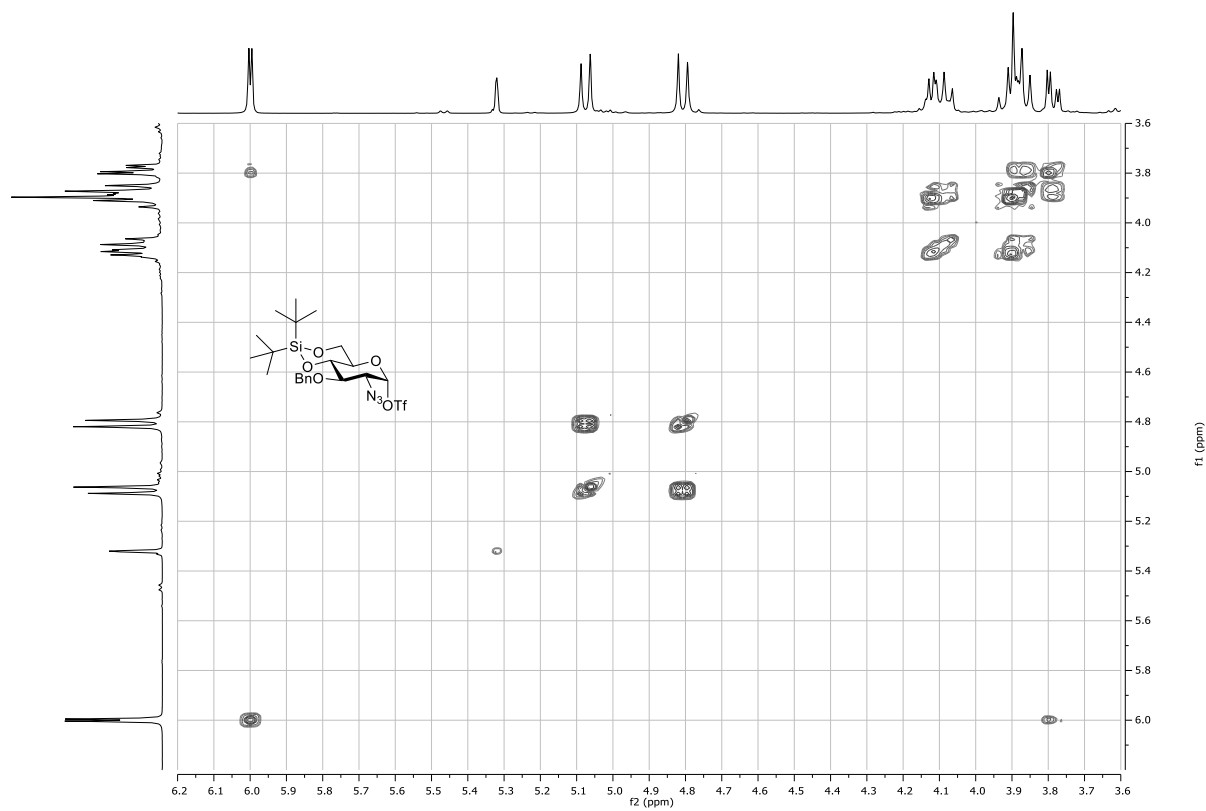

$^1\text{H}$ - $^{13}\text{C}$  HSQC NMR,  $\text{CD}_2\text{Cl}_2$

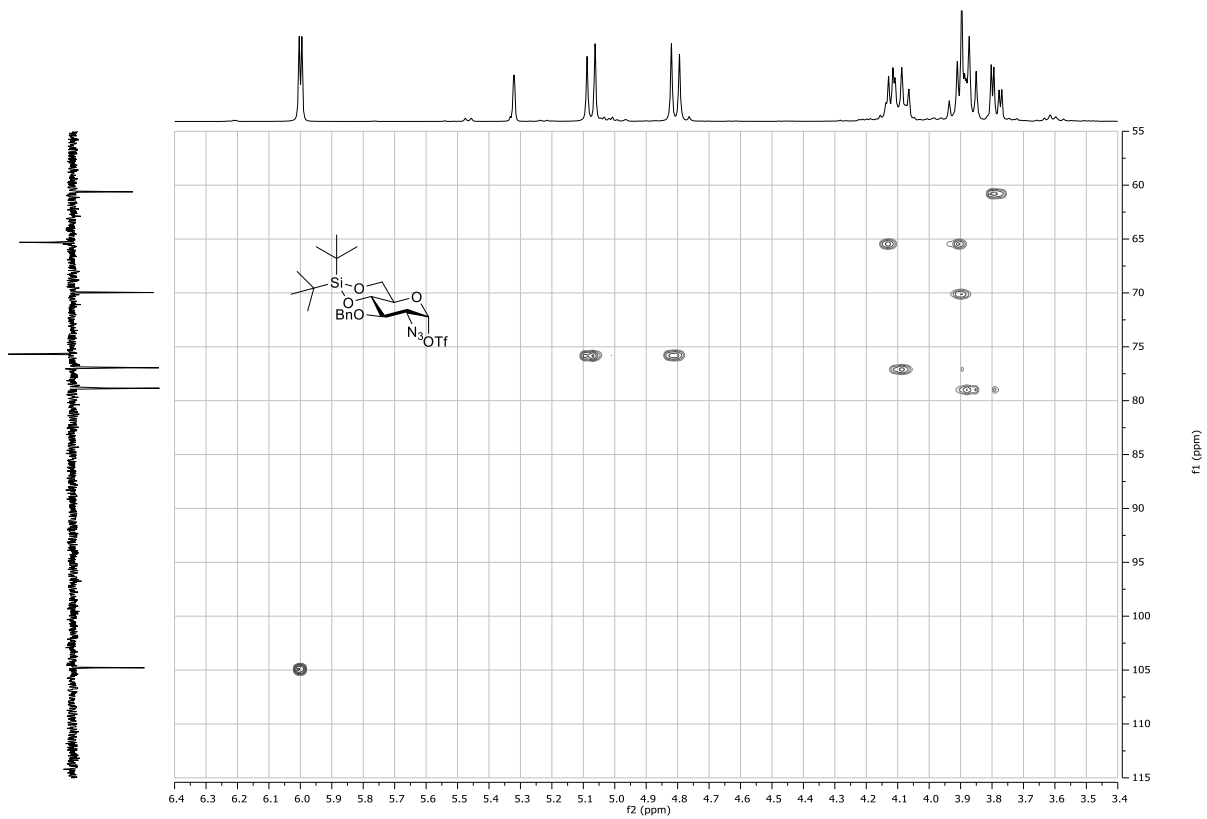

$^1\text{H}$ - $^{13}\text{C}$  HMBC NMR,  $\text{CD}_2\text{Cl}_2$

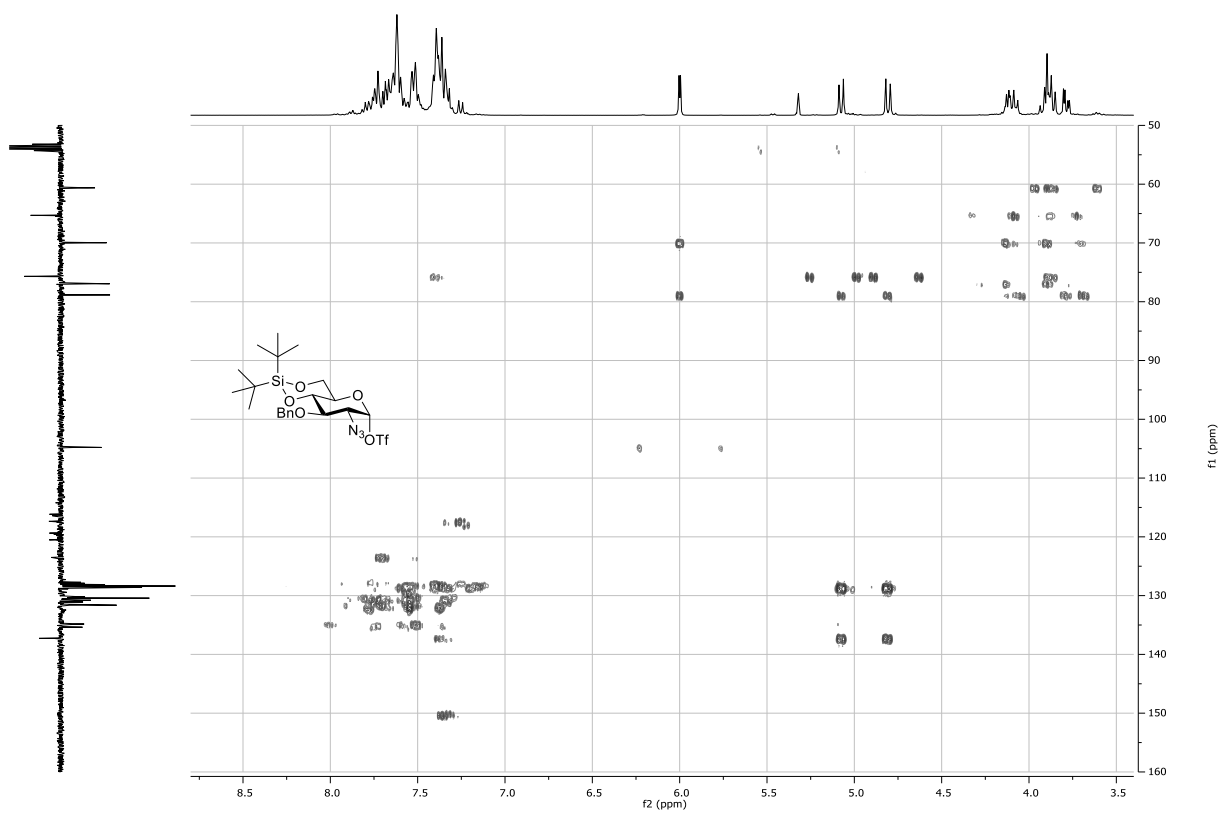



Decomposition study  $^1\text{H}$  NMR, 400 MHz,  $\text{CD}_2\text{Cl}_2$

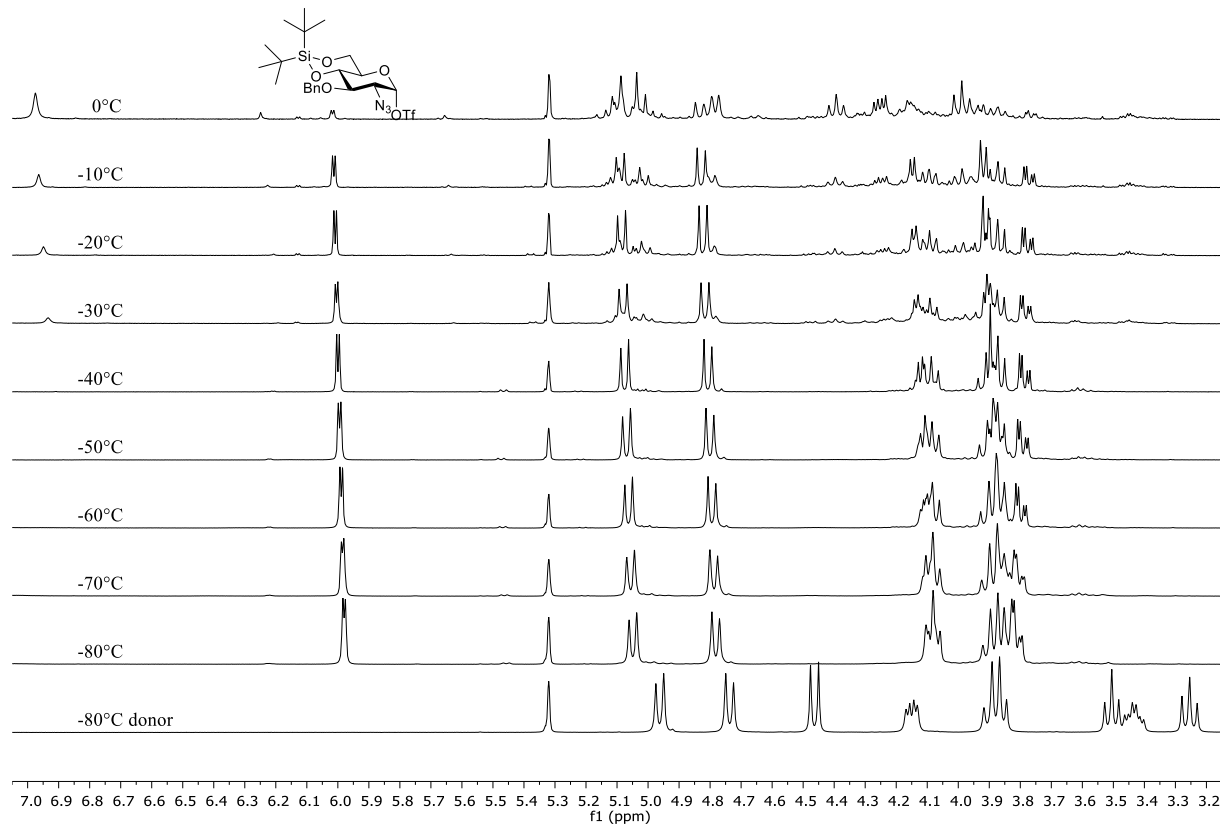

Trifluoromethanesulfonyl 2-azido-3-*O*-benzyl-4,6-*O*-benzylidene-2-deoxy- $\alpha$ -D-glucopyranoside (**21**).

$^1\text{H}$  NMR, 400 MHz,  $\text{CD}_2\text{Cl}_2$

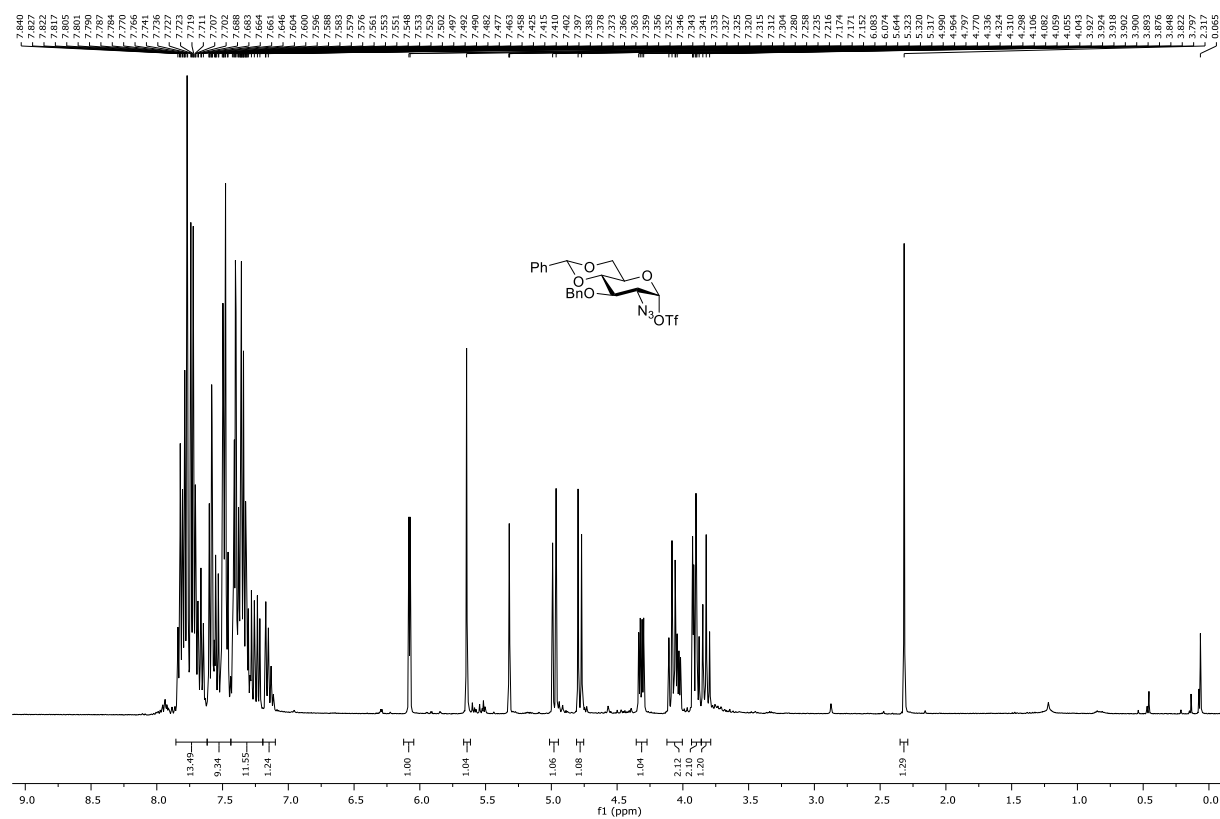

$^{13}\text{C}$ -APT NMR, 101 MHz,  $\text{CD}_2\text{Cl}_2$

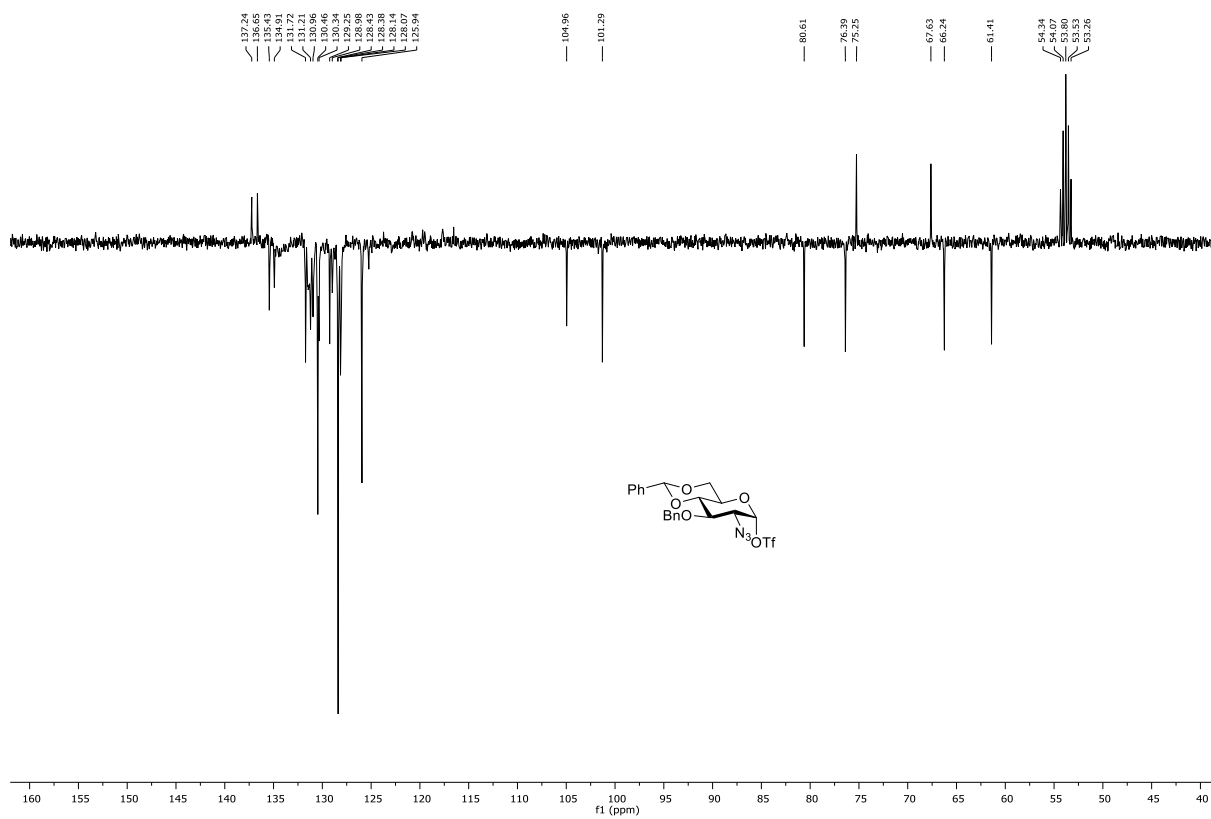

$^1\text{H}$ - $^1\text{H}$  COSY NMR,  $\text{CD}_2\text{Cl}_2$

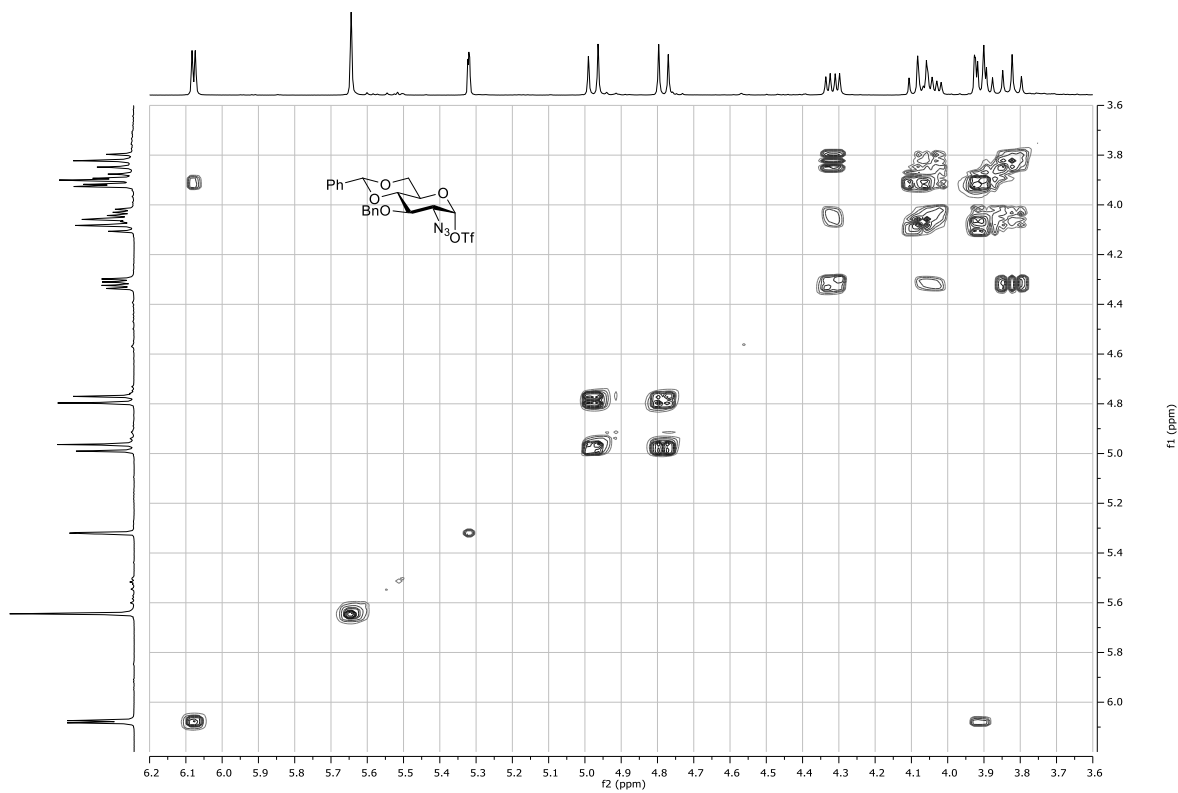

$^1\text{H}$ - $^{13}\text{C}$  HSQC NMR,  $\text{CD}_2\text{Cl}_2$

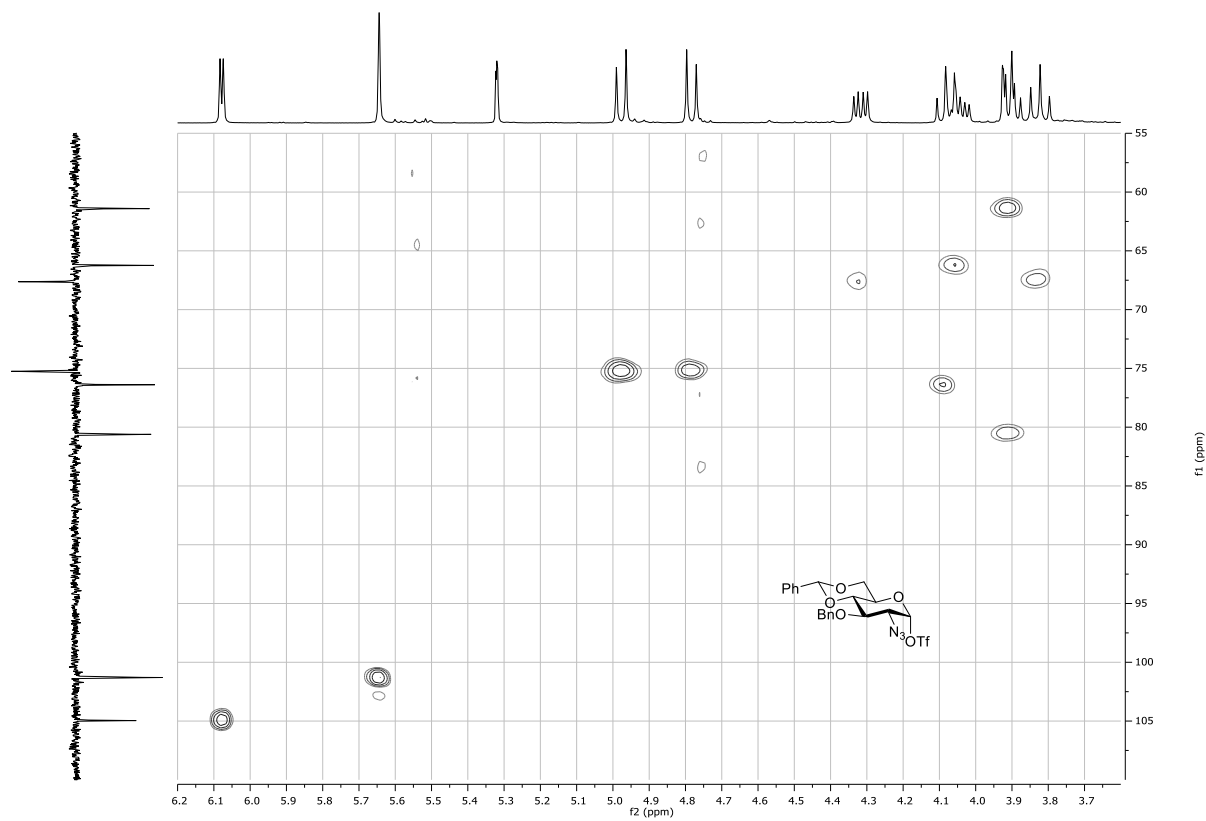

Decomposition study  $^1\text{H}$  NMR, 400 MHz,  $\text{CD}_2\text{Cl}_2$

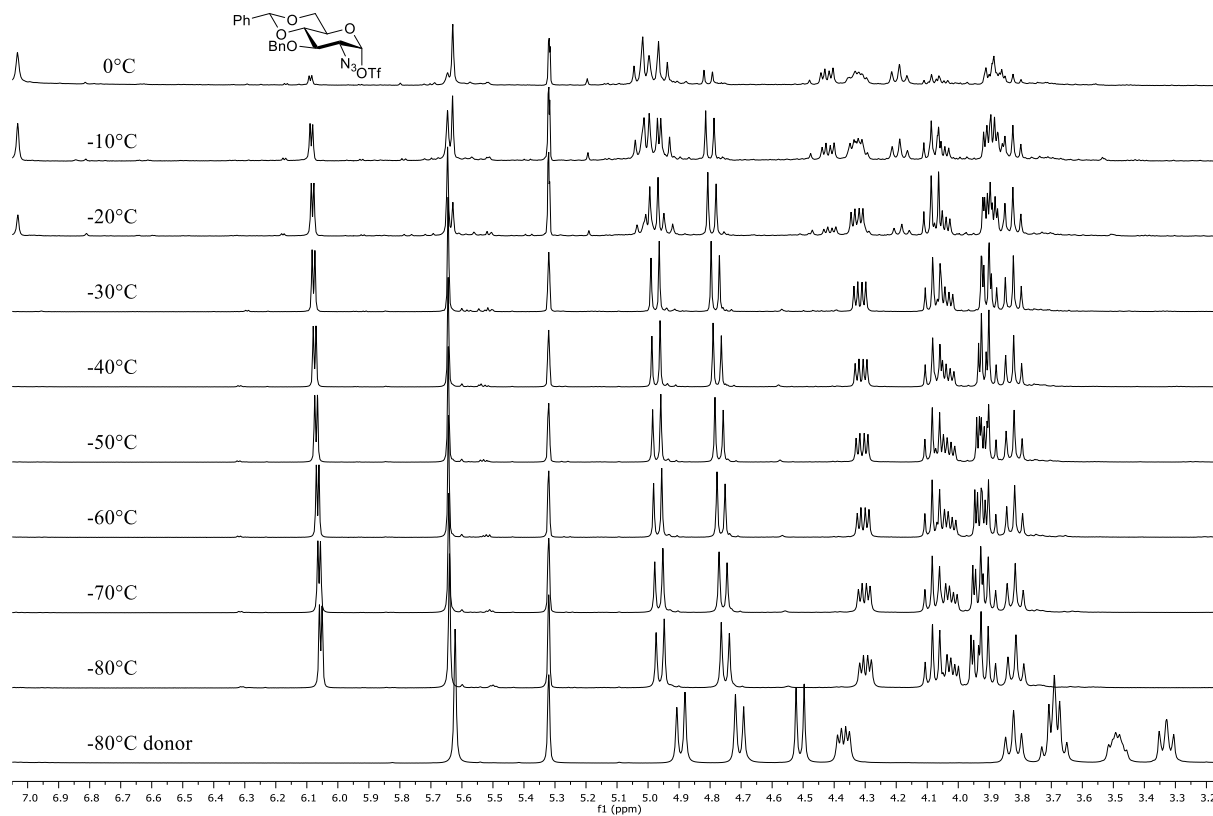

Trifluoromethanesulfonyl 2-azido-3-*O*-benzoyl-4,6-*O*-benzylidene-2-deoxy- $\alpha$ -D-glucopyranoside (**22**).

$^1\text{H}$  NMR, 400 MHz,  $\text{CD}_2\text{Cl}_2$

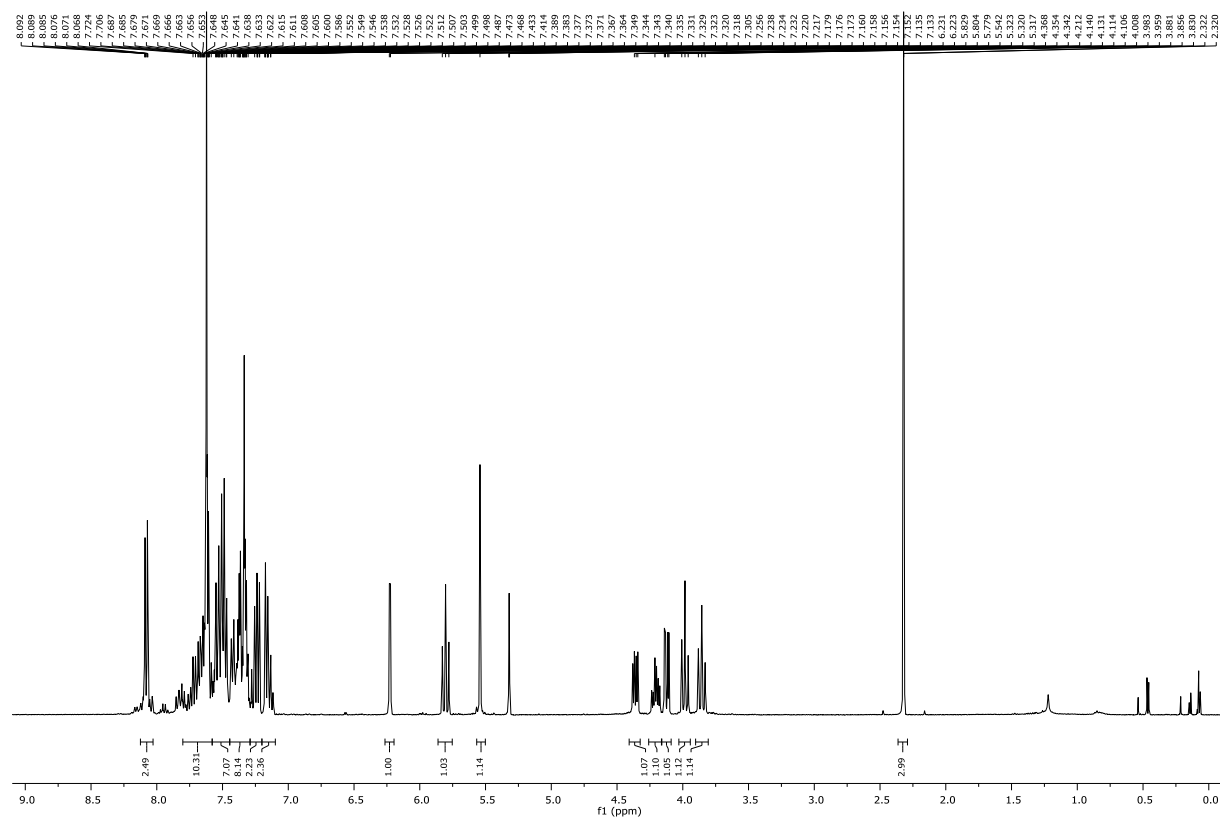

$^{13}\text{C}$ -APT NMR, 101 MHz,  $\text{CD}_2\text{Cl}_2$

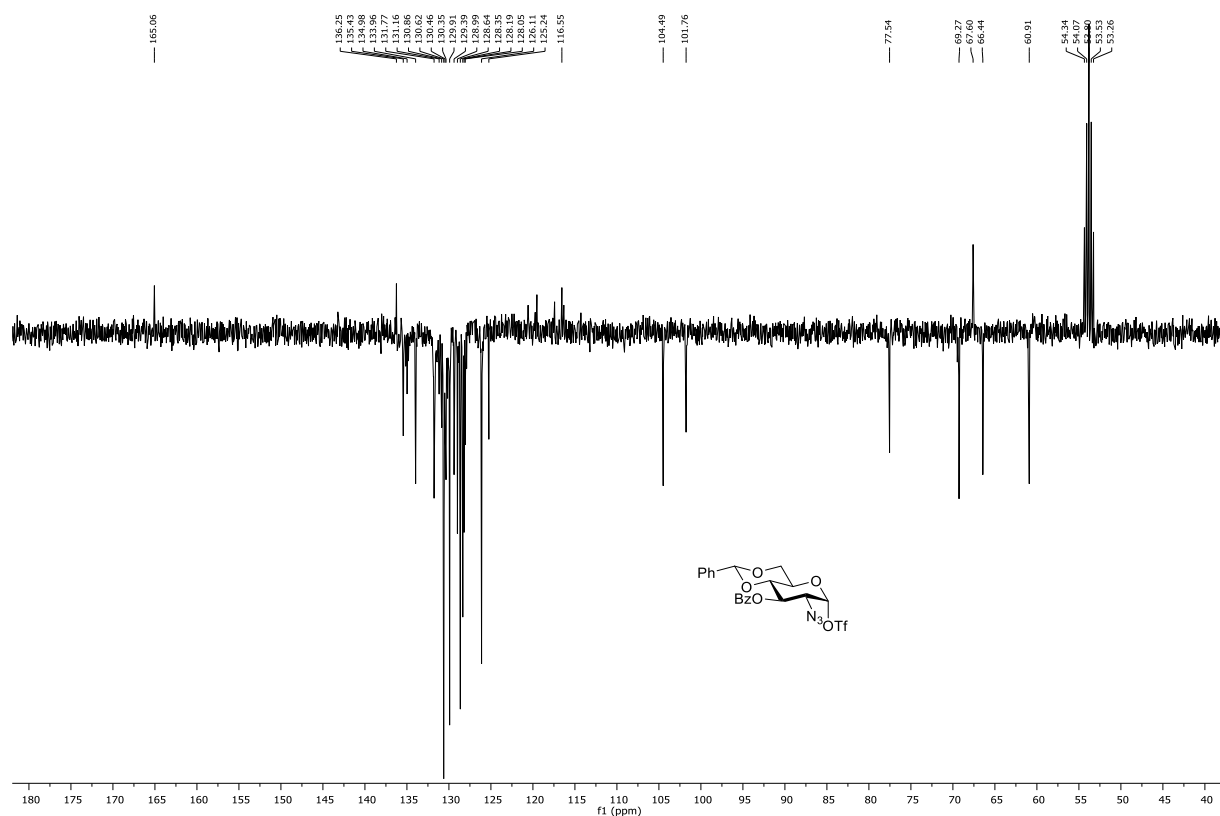

$^1\text{H}$ - $^1\text{H}$  COSY NMR,  $\text{CD}_2\text{Cl}_2$

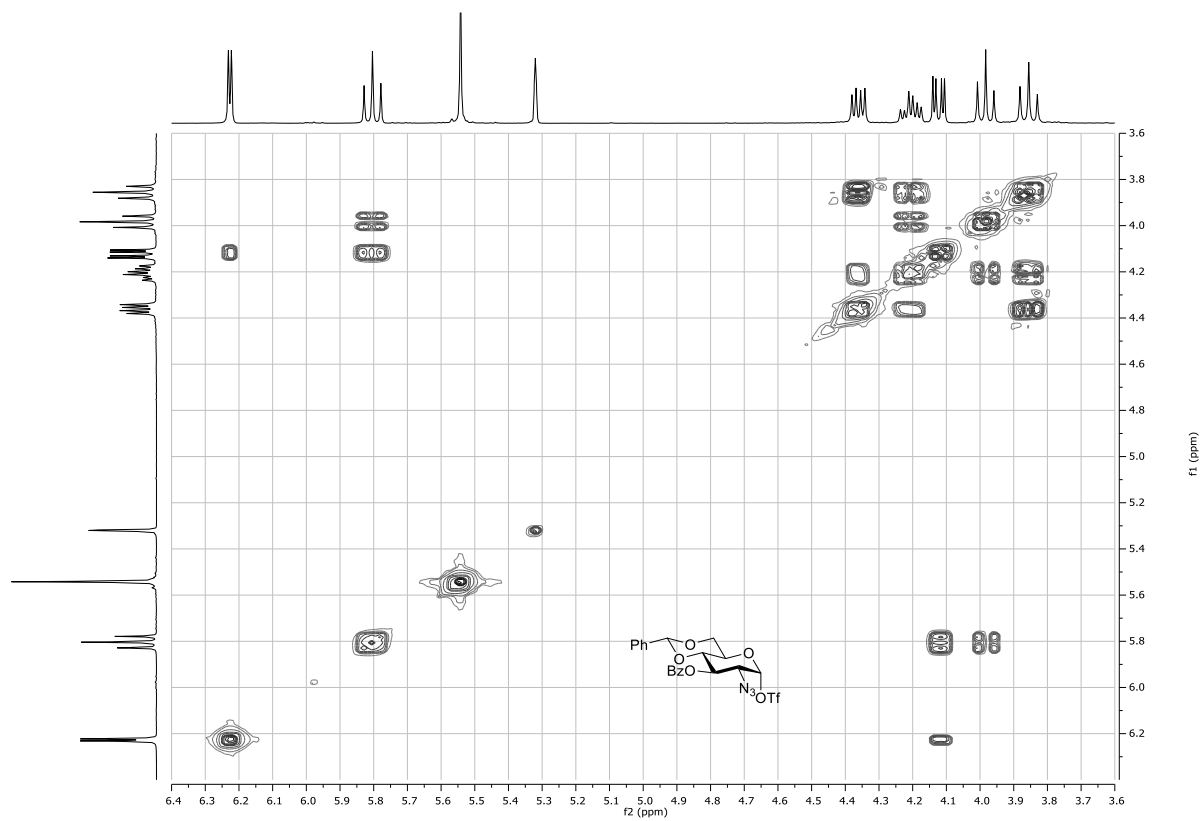

$^1\text{H}$ - $^{13}\text{C}$  HSQC NMR,  $\text{CD}_2\text{Cl}_2$

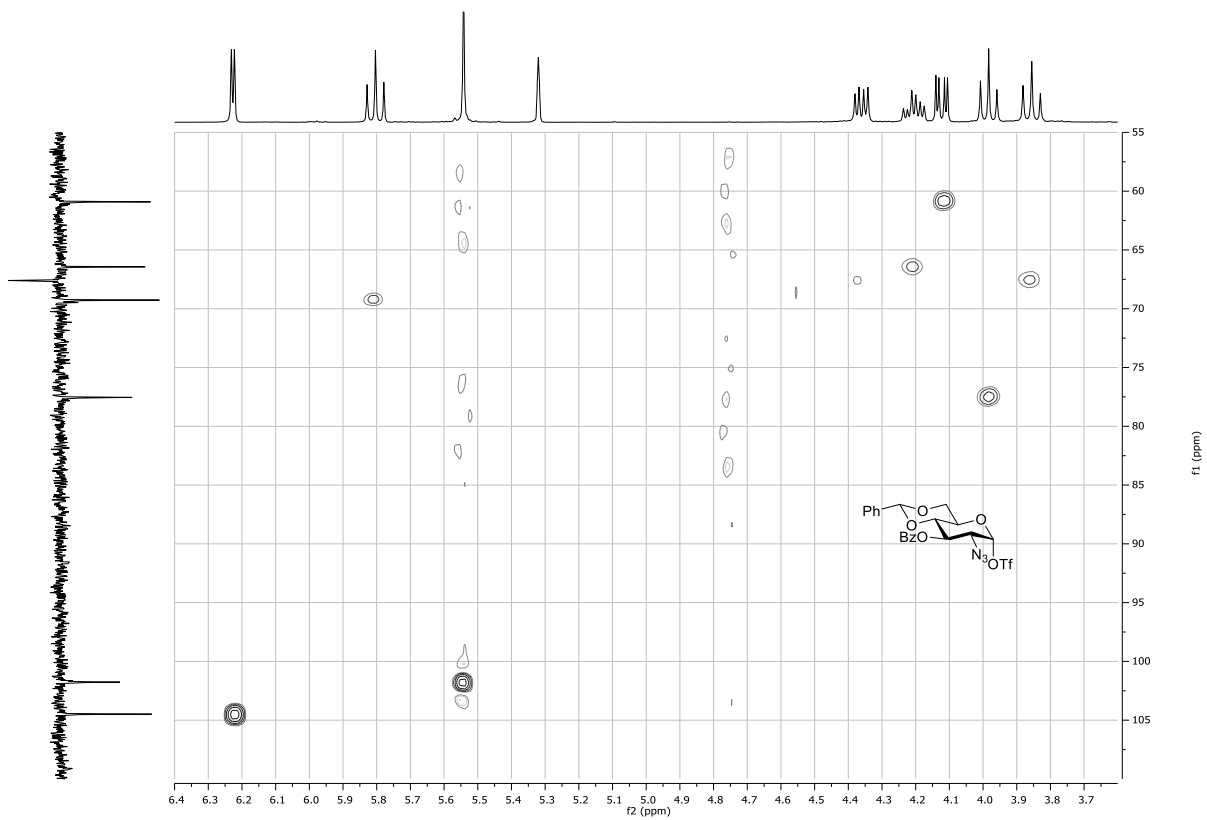

Activation study  $^1\text{H}$  NMR, 400 MHz,  $\text{CD}_2\text{Cl}_2$

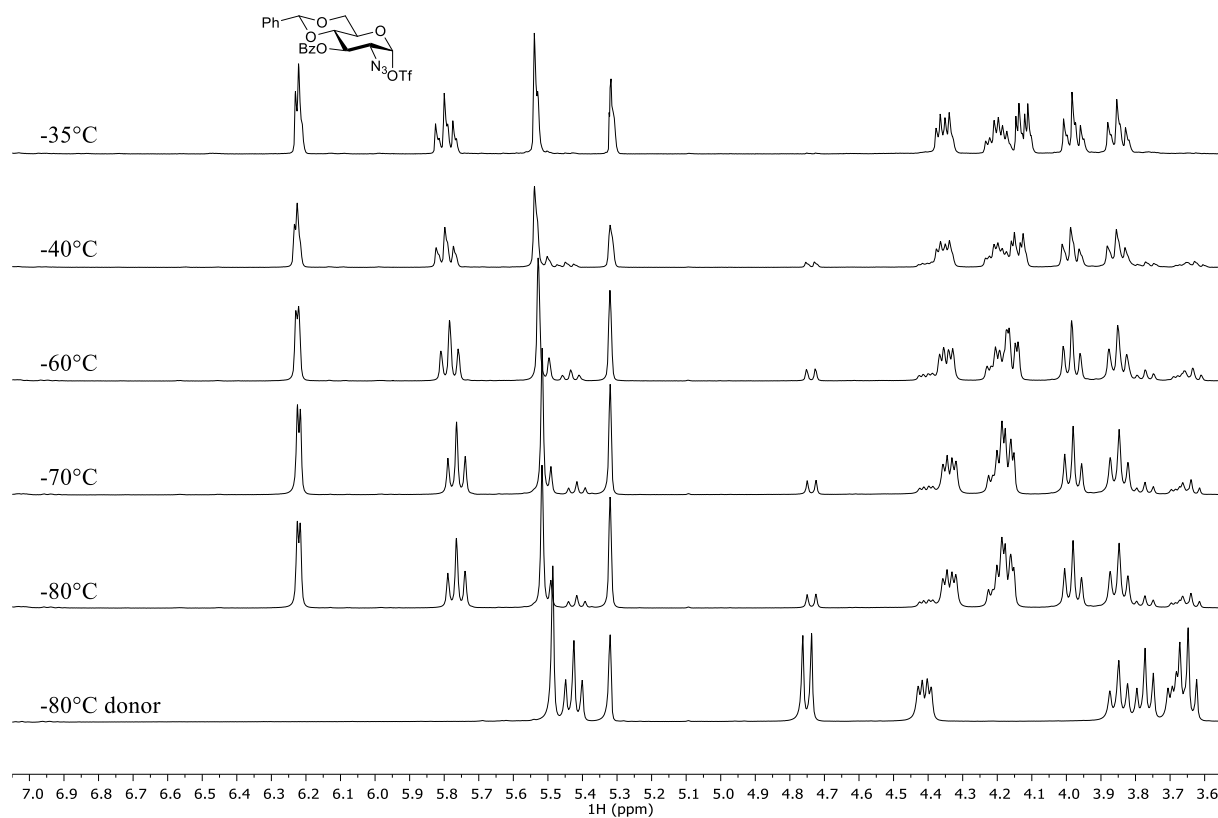

Decomposition study  $^1\text{H}$  NMR, 400 MHz,  $\text{CD}_2\text{Cl}_2$

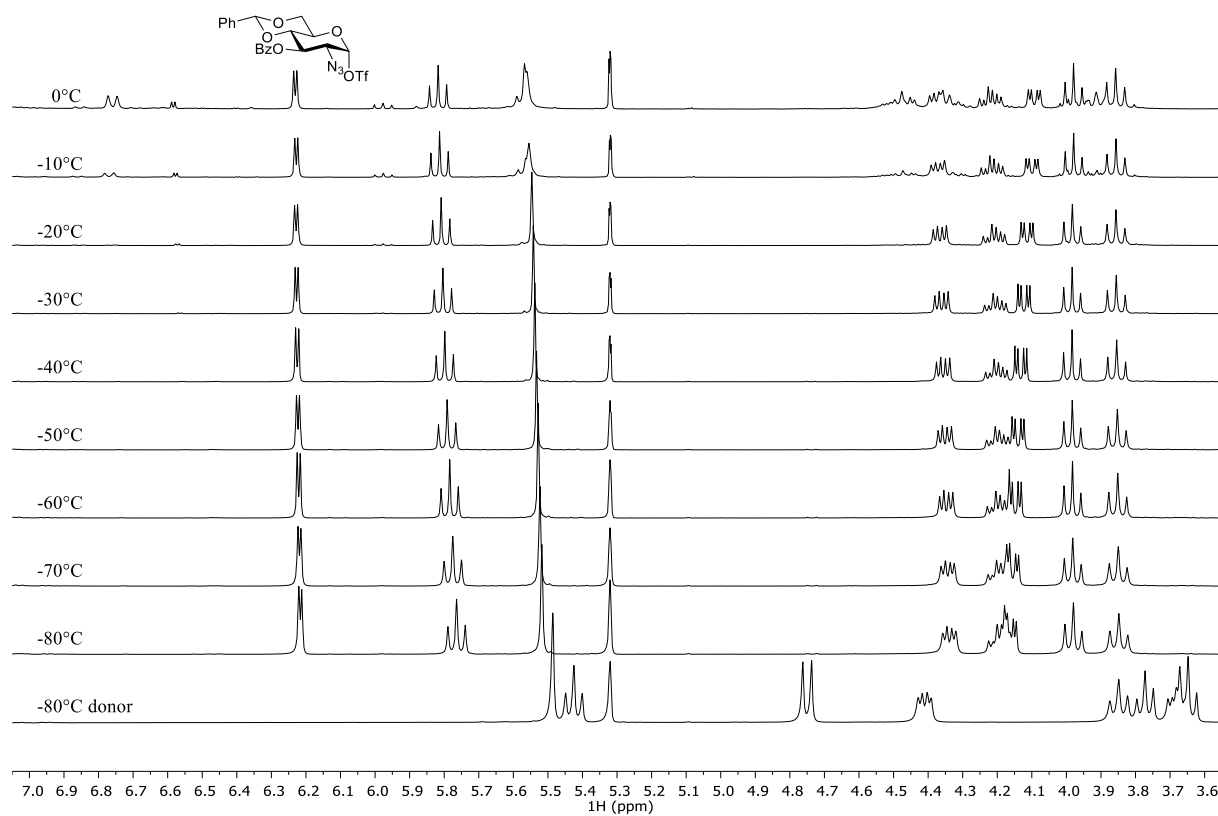

Trifluoromethanesulfonyl 2-(3,5-dinitro-4-pyridone)-3-*O*-benzyl-4,6-*O*-benzylidene-2-deoxy  $\alpha$ -D-glucopyranoside (**23**).

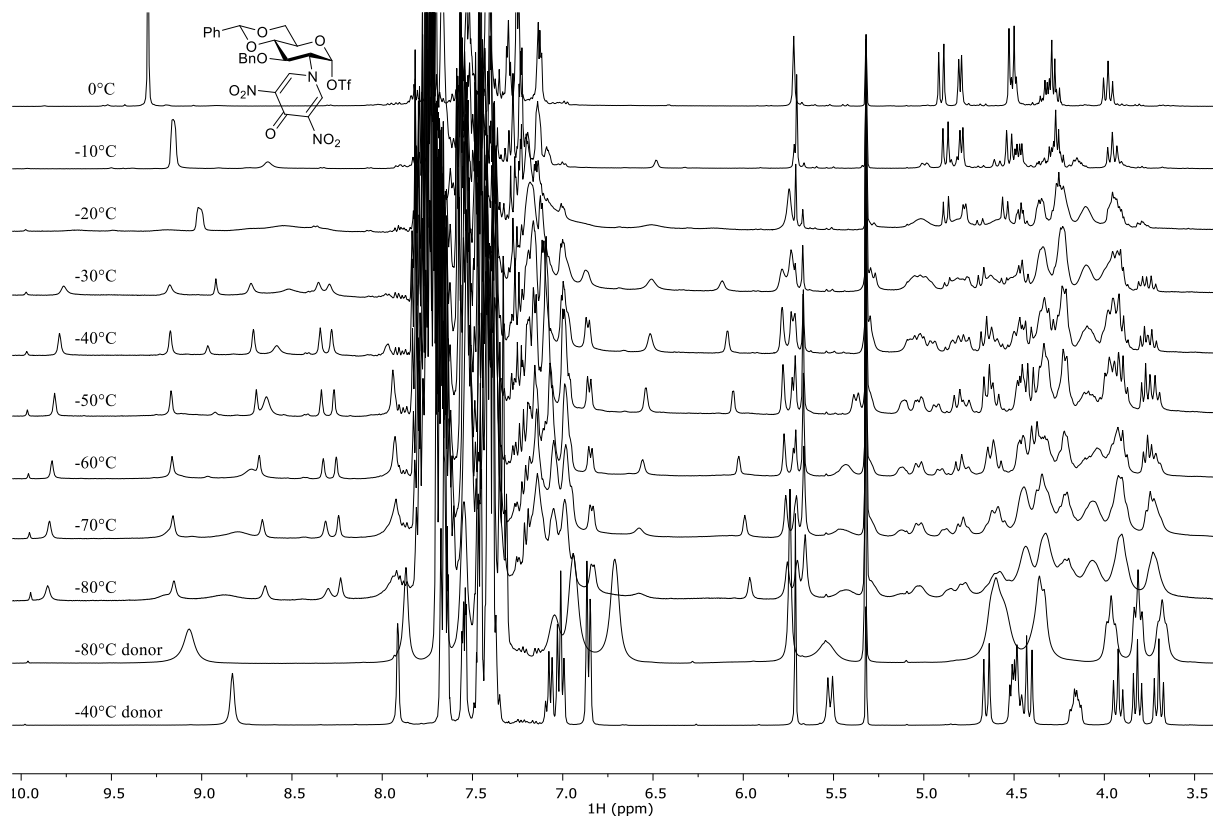

Competition experiment between donors **1** and **2**, with acceptor **25**.

14 : 1, 1C:2C

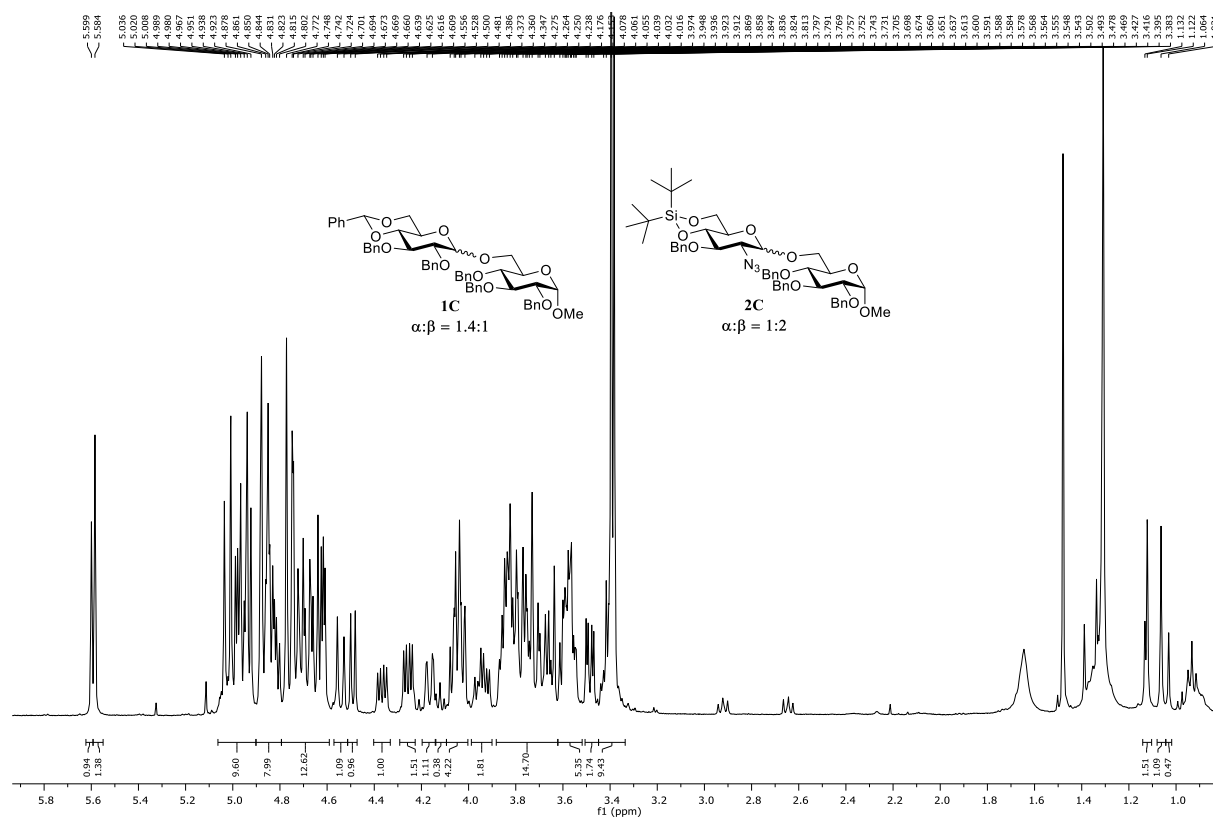

Competition experiment between donors **1** and **3**, with acceptor **25**.

**1** : **0**, **1C**:**3C**

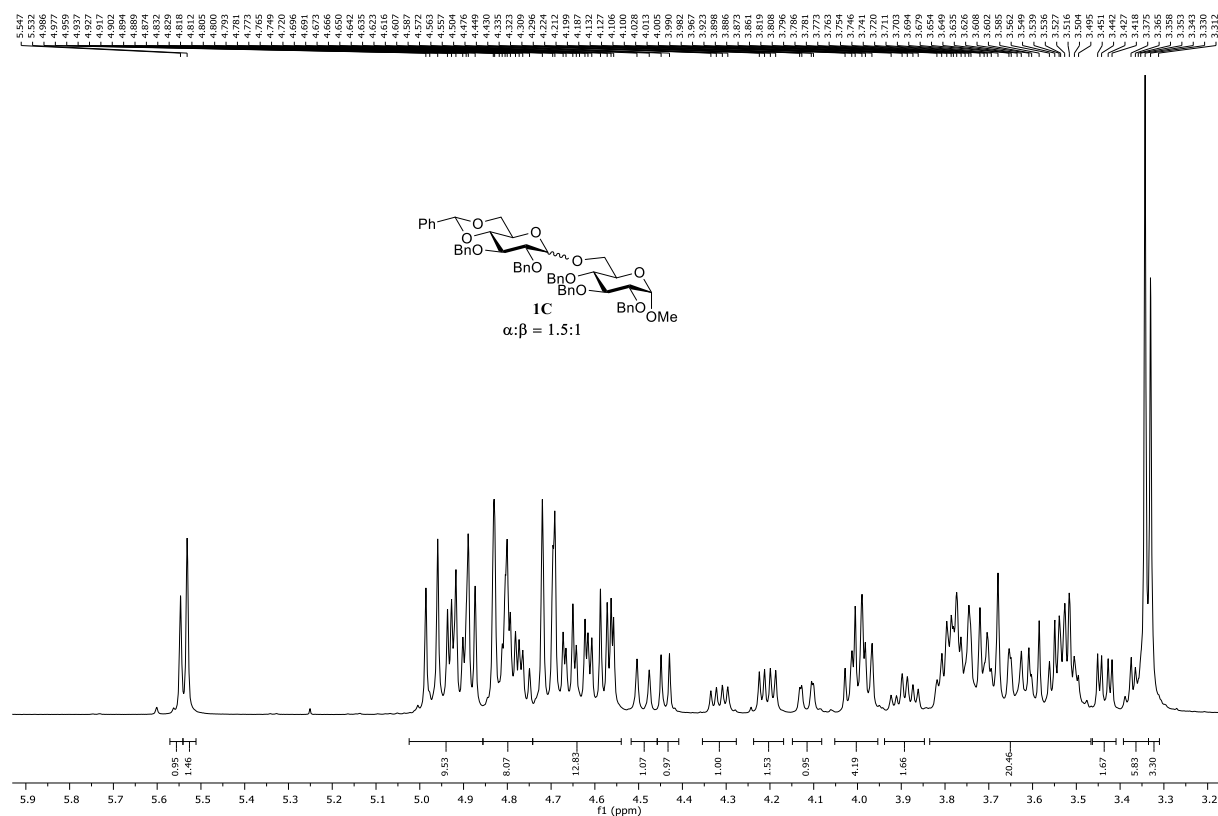

Competition experiment between donors **2** and **3**, with acceptor **25**.

**6** : **1**, **2C**:**3C**

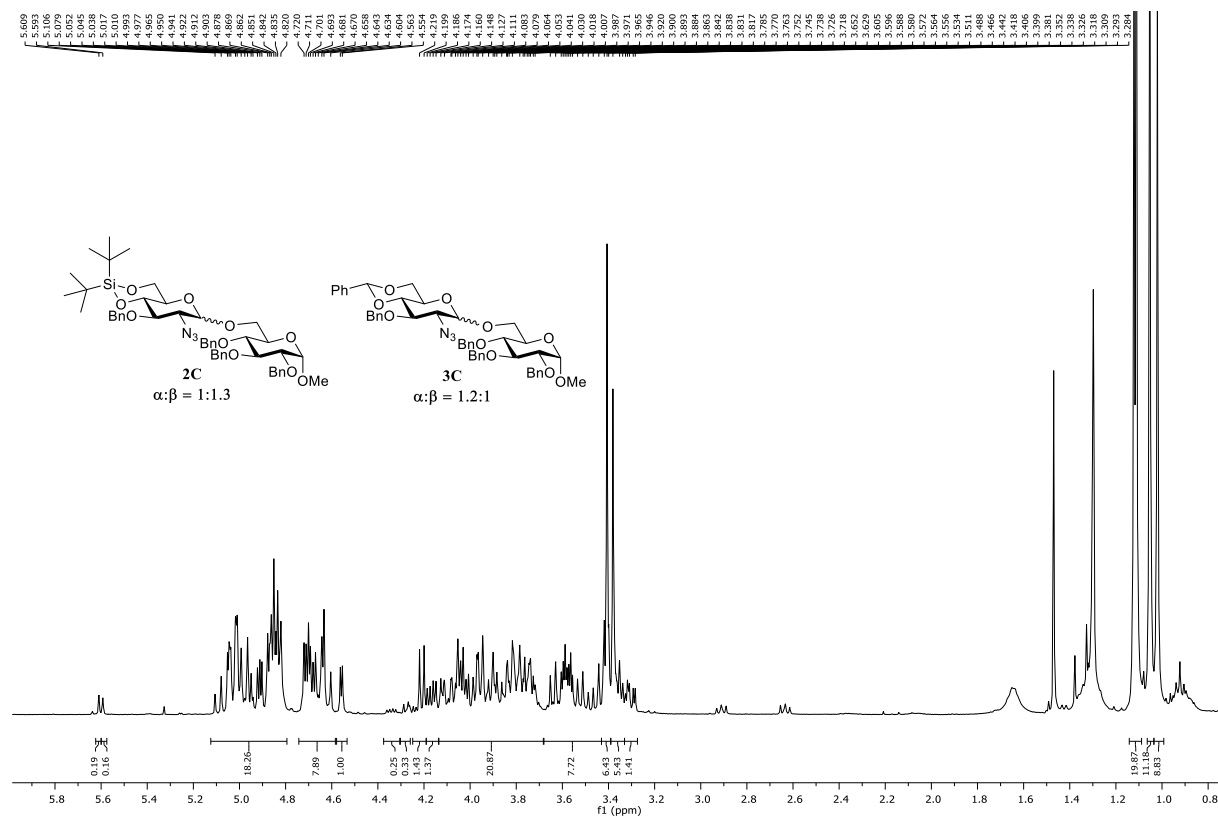



Competition experiment between donors **3** and **4**, with acceptor **25**.

1.6 : 1, **3C**:**4C**

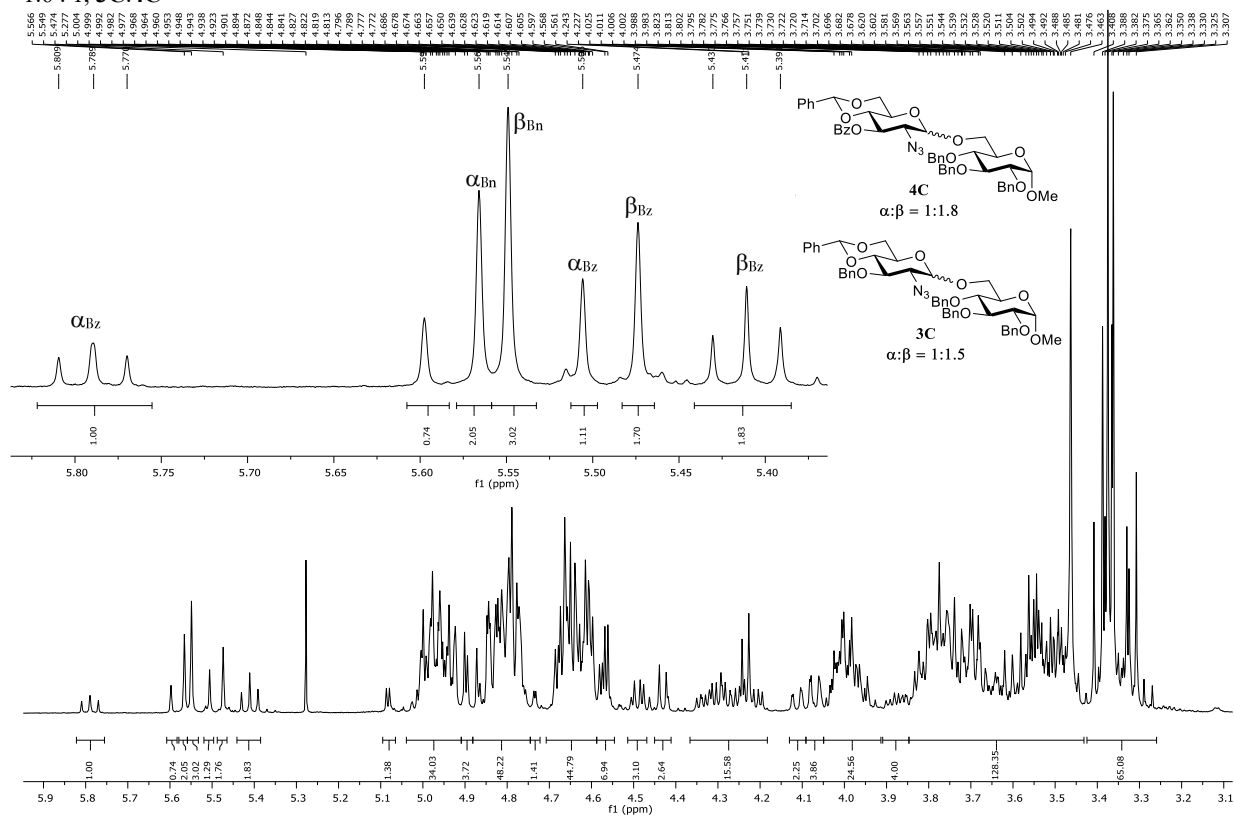

Competition experiment between donors **4** and **5**, with acceptor **25**.

1 : 0, **4C**:**5C**

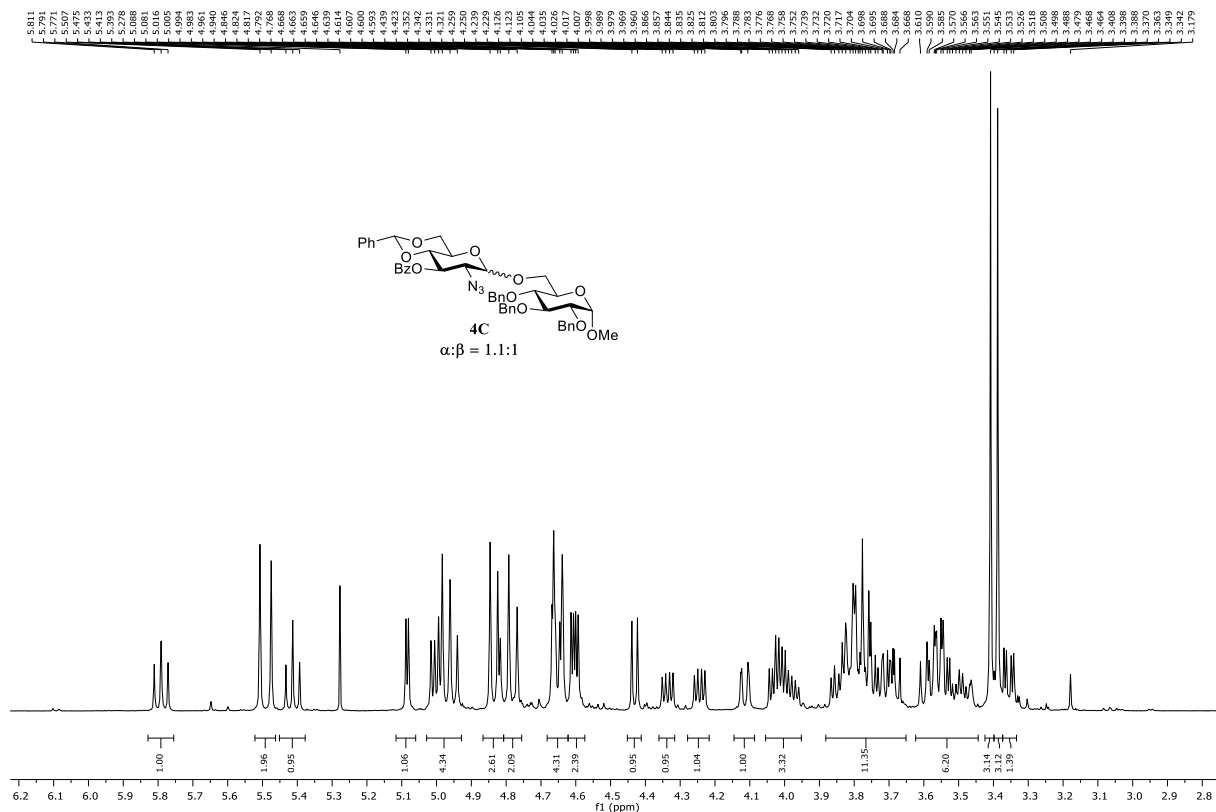

Ethyl 2-azido-3-*O*-benzyl-2-deoxy-4,6-*O*-di-*tert*-butylsilylidene- $\beta$ -D-glucopyranoside (**2A**).

$^1\text{H}$  NMR, 400 MHz,  $\text{CDCl}_3$

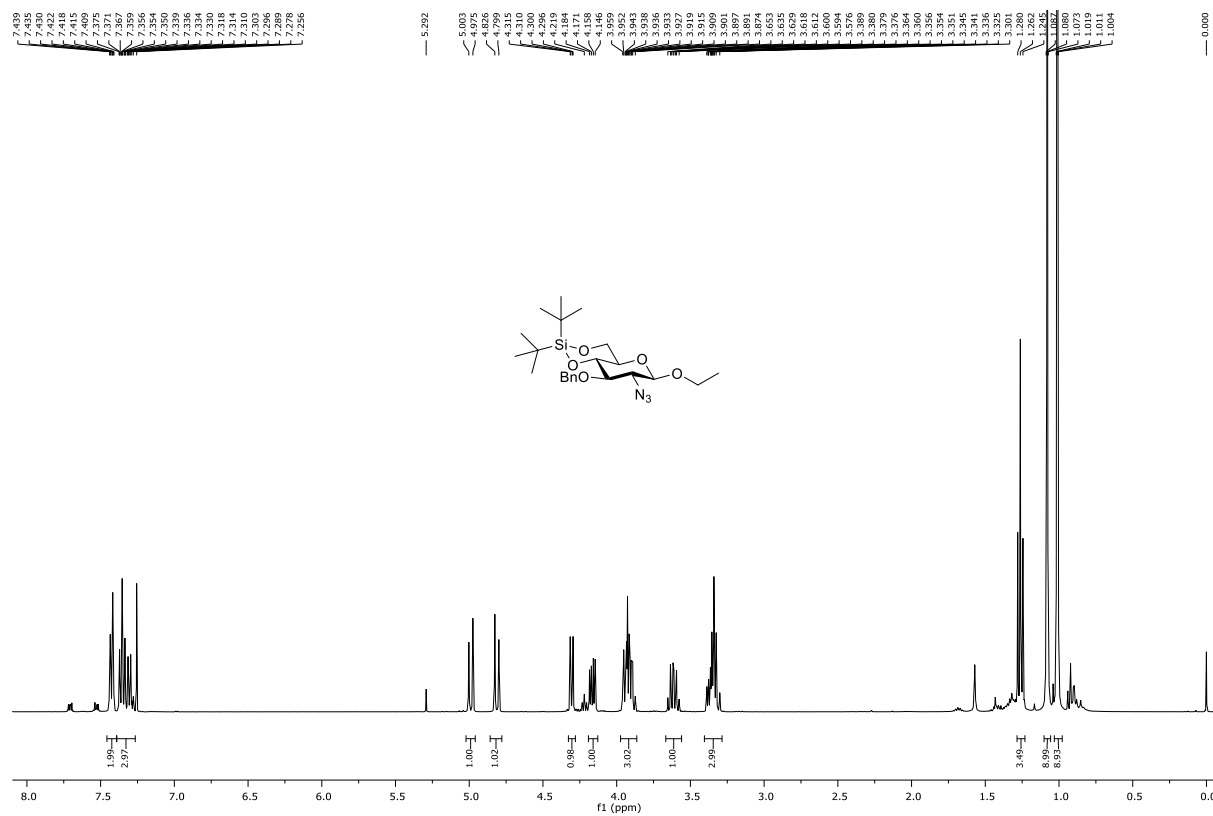

$^{13}\text{C}$ -APT NMR, 101 MHz,  $\text{CDCl}_3$

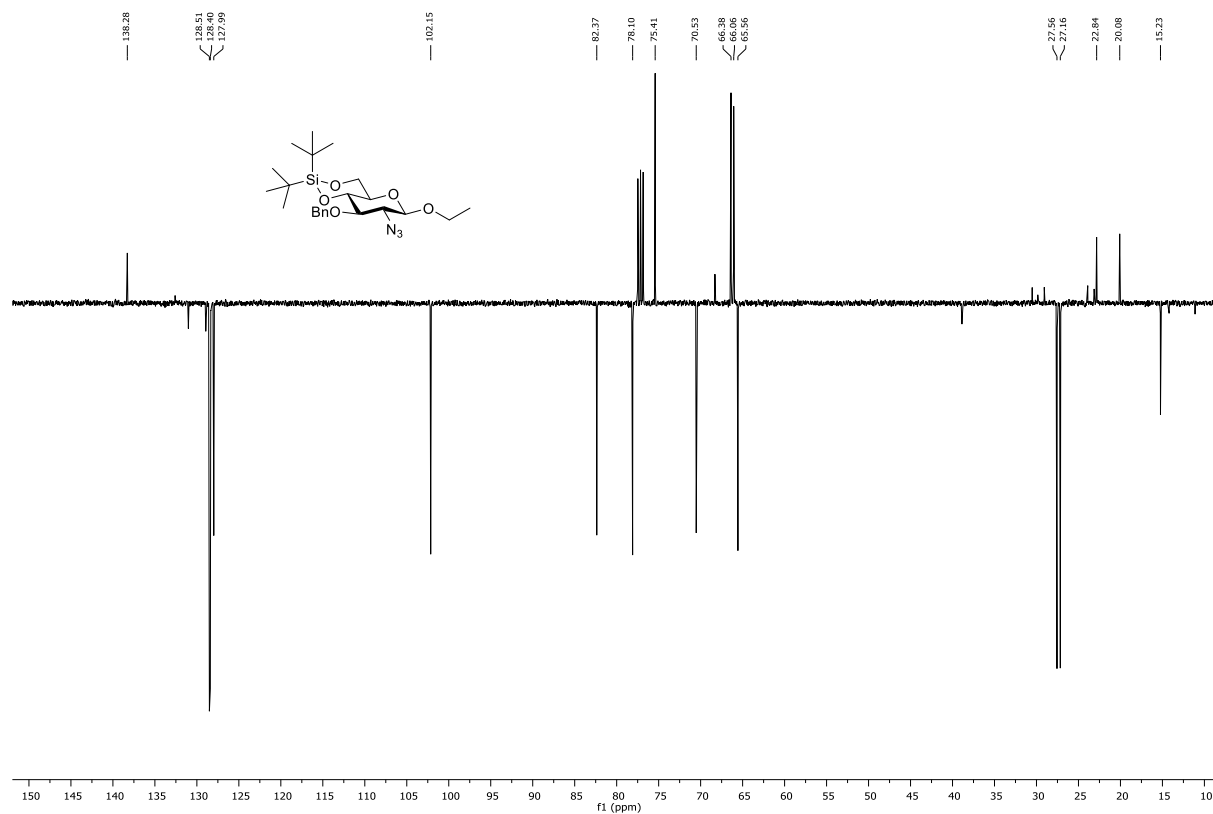

$^1\text{H}$ - $^1\text{H}$  COSY NMR

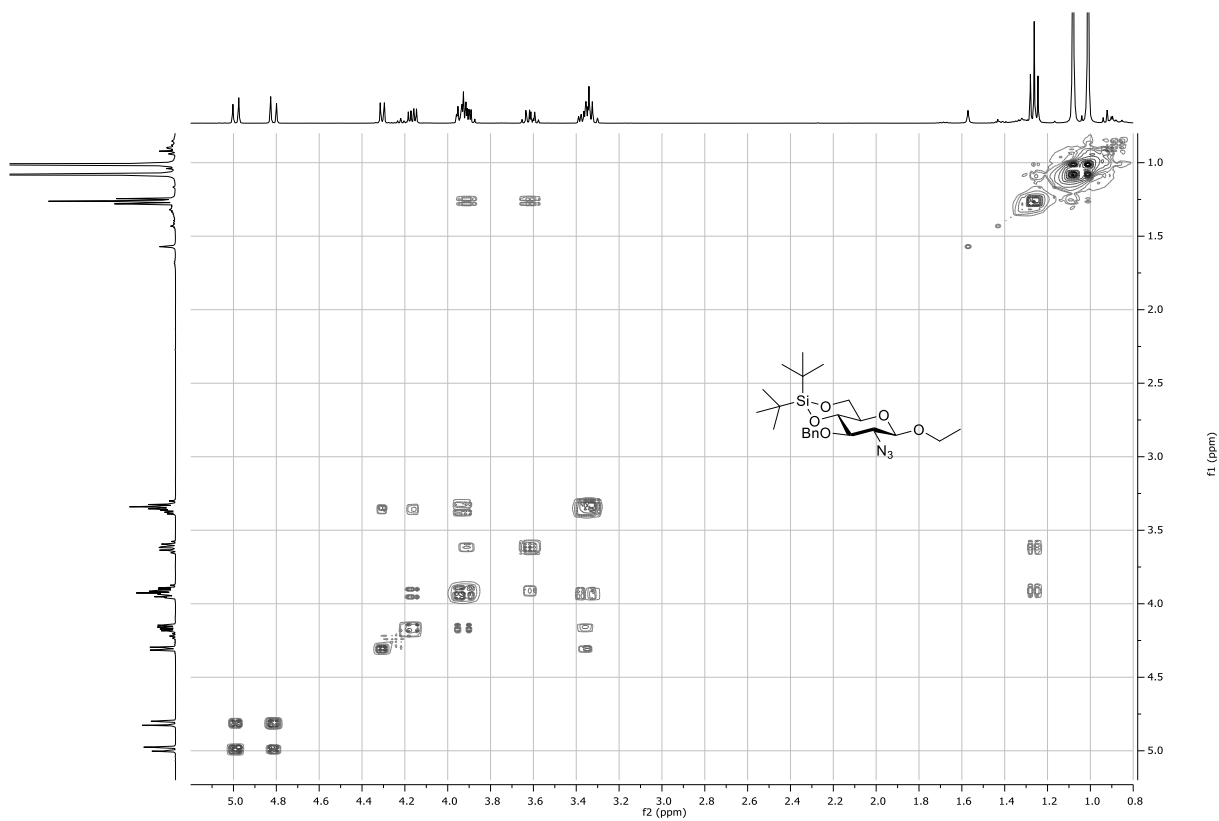

$^1\text{H}$ - $^{13}\text{C}$  HSQC NMR

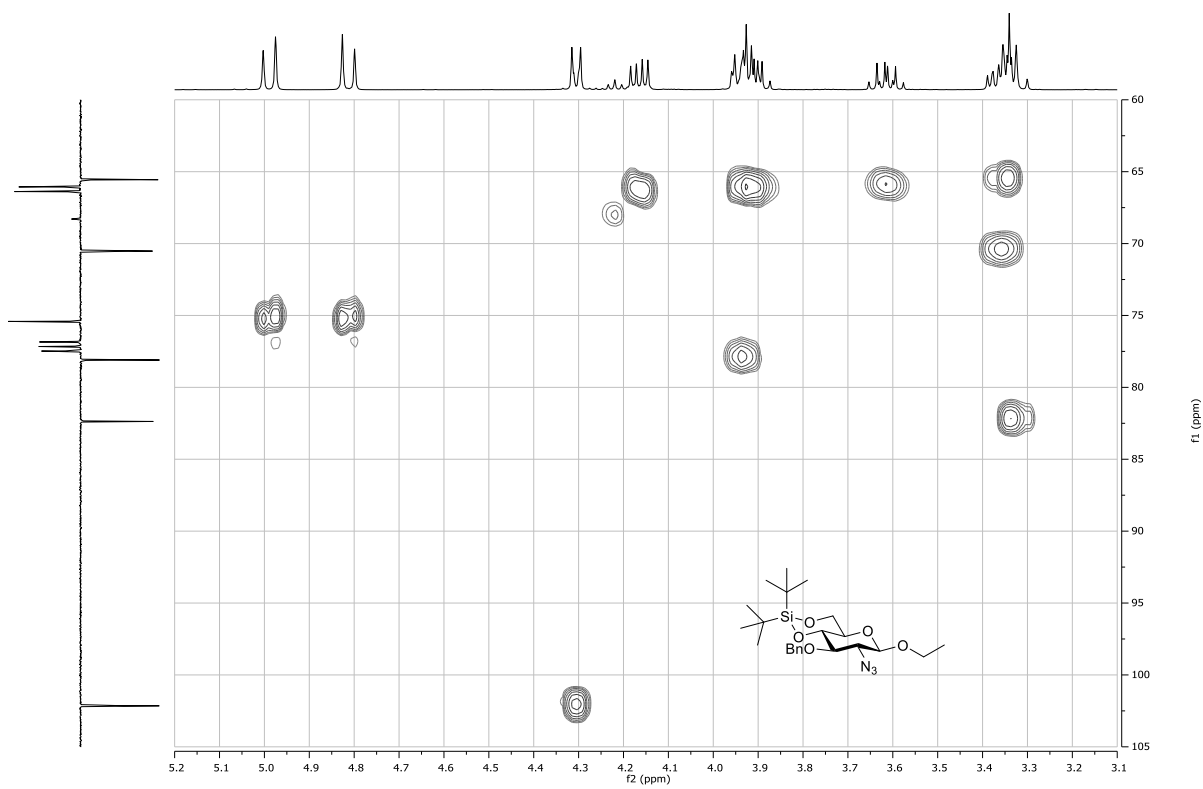

Cyclohexyl 2-azido-3-*O*-benzyl-2-deoxy-4,6-*O*-di-*tert*-butylsilylidene- $\beta$ -D-glucopyranoside (**2B**).

$^1\text{H}$  NMR, 400 MHz,  $\text{CDCl}_3$

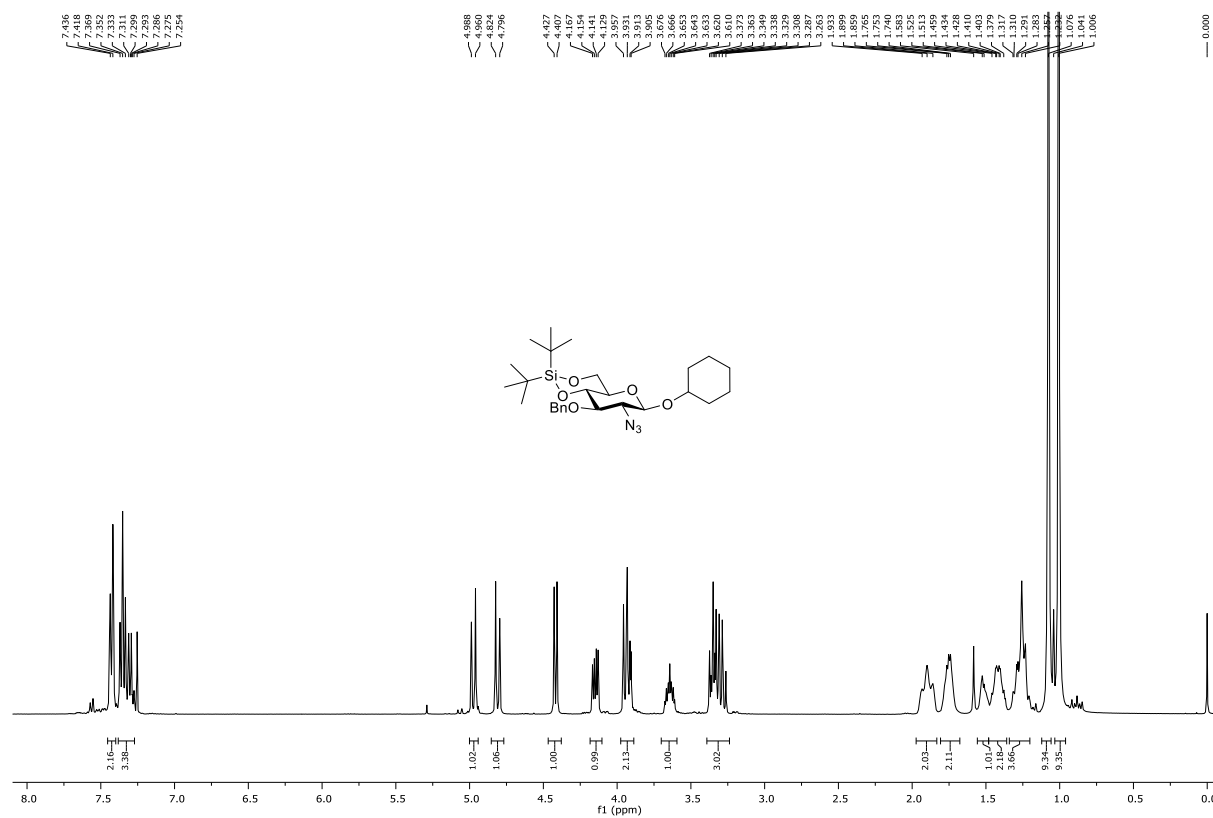

$^{13}\text{C}$ -APT NMR, 101 MHz,  $\text{CDCl}_3$

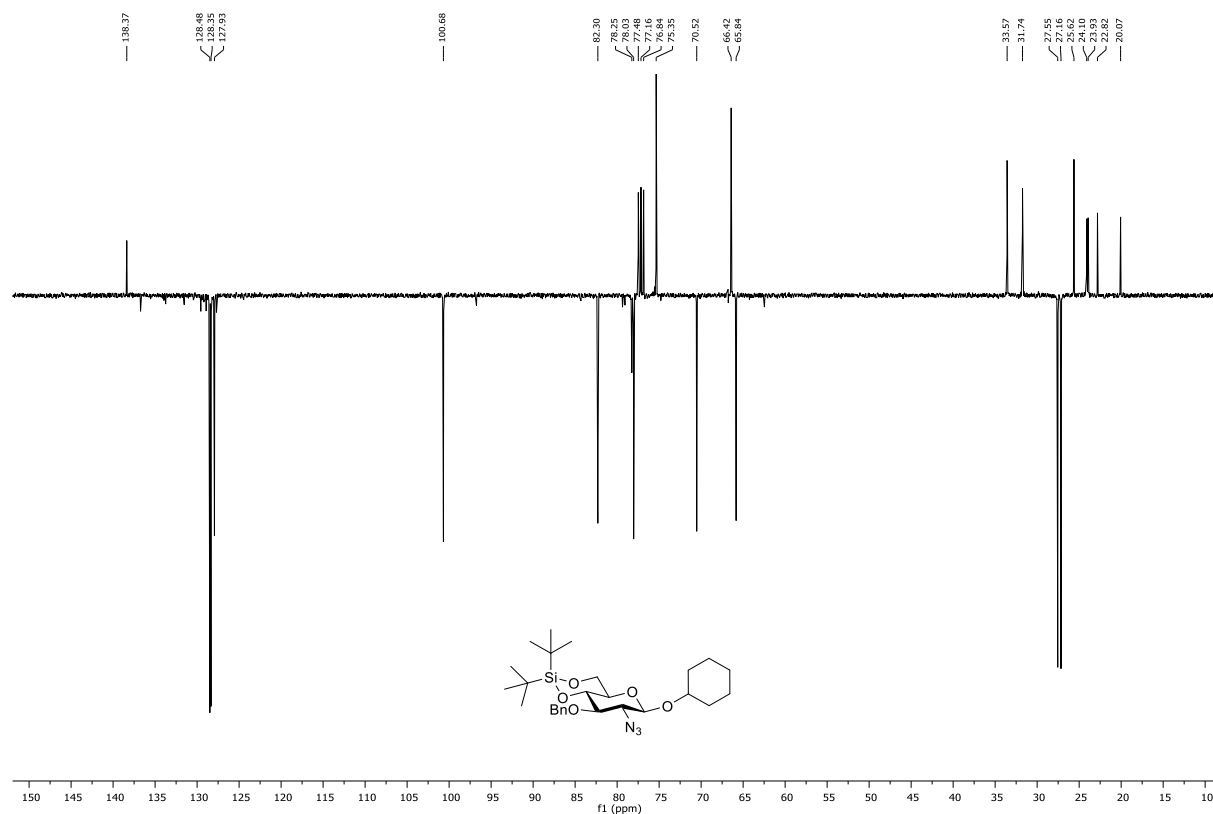

$^1\text{H}$ - $^1\text{H}$  COSY NMR

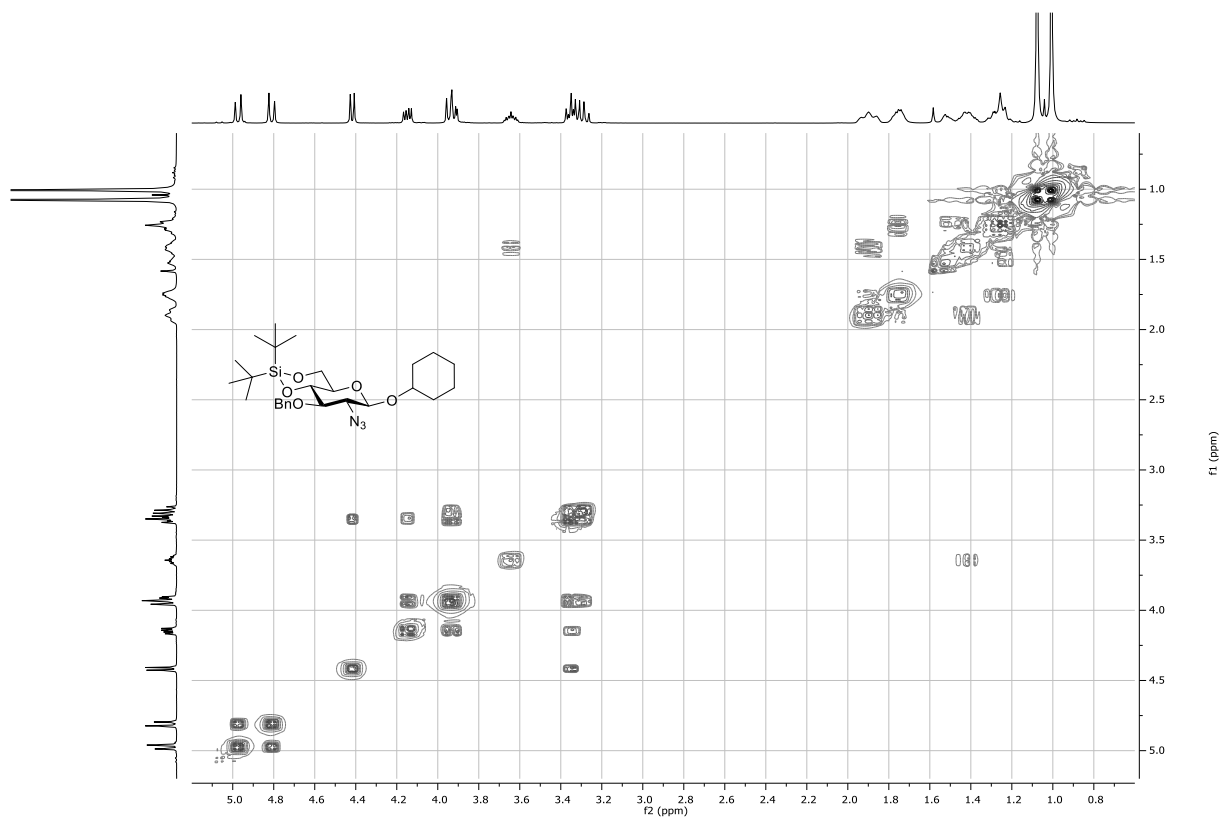

$^1\text{H}$ - $^{13}\text{C}$  HSQC NMR

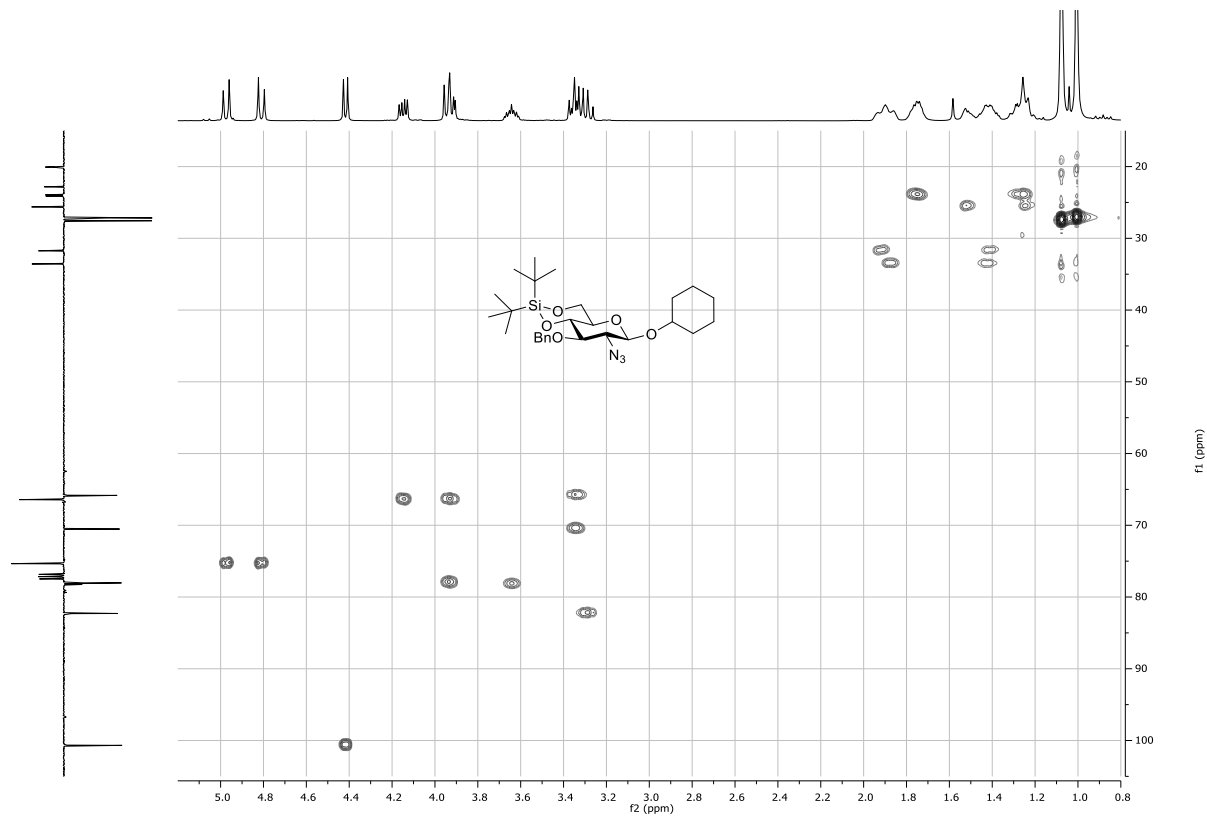

Methyl 6-*O*-(2-azido-3-*O*-benzyl-2-deoxy-4,6-*O*-di-*tert*-butylsilylidene- $\alpha$ / $\beta$ -*D*-glucopyranosyl)-2,3,4-tri-*O*-benzyl- $\alpha$ -*D*-glucopyranoside (**2C**).

<sup>1</sup>H NMR, 400 MHz, CDCl<sub>3</sub>

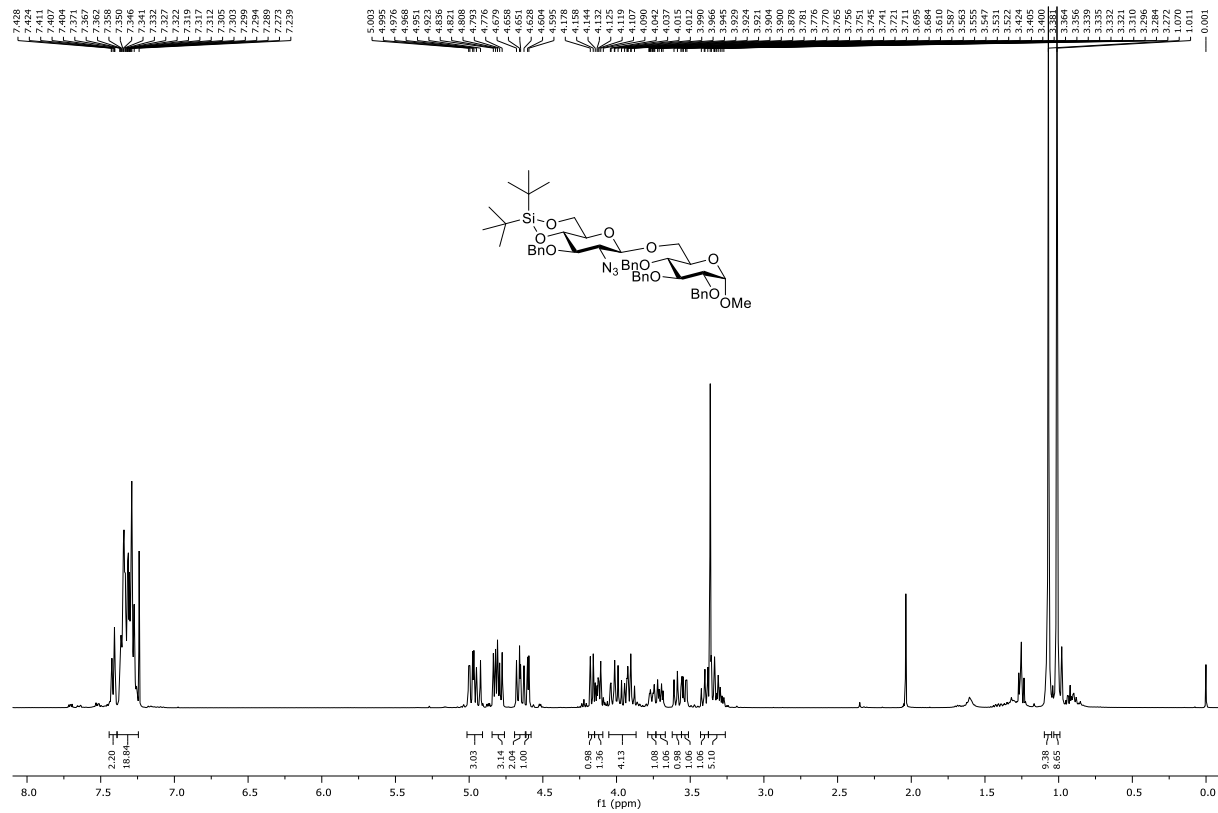

<sup>13</sup>C-APT NMR, 101 MHz, CDCl<sub>3</sub>

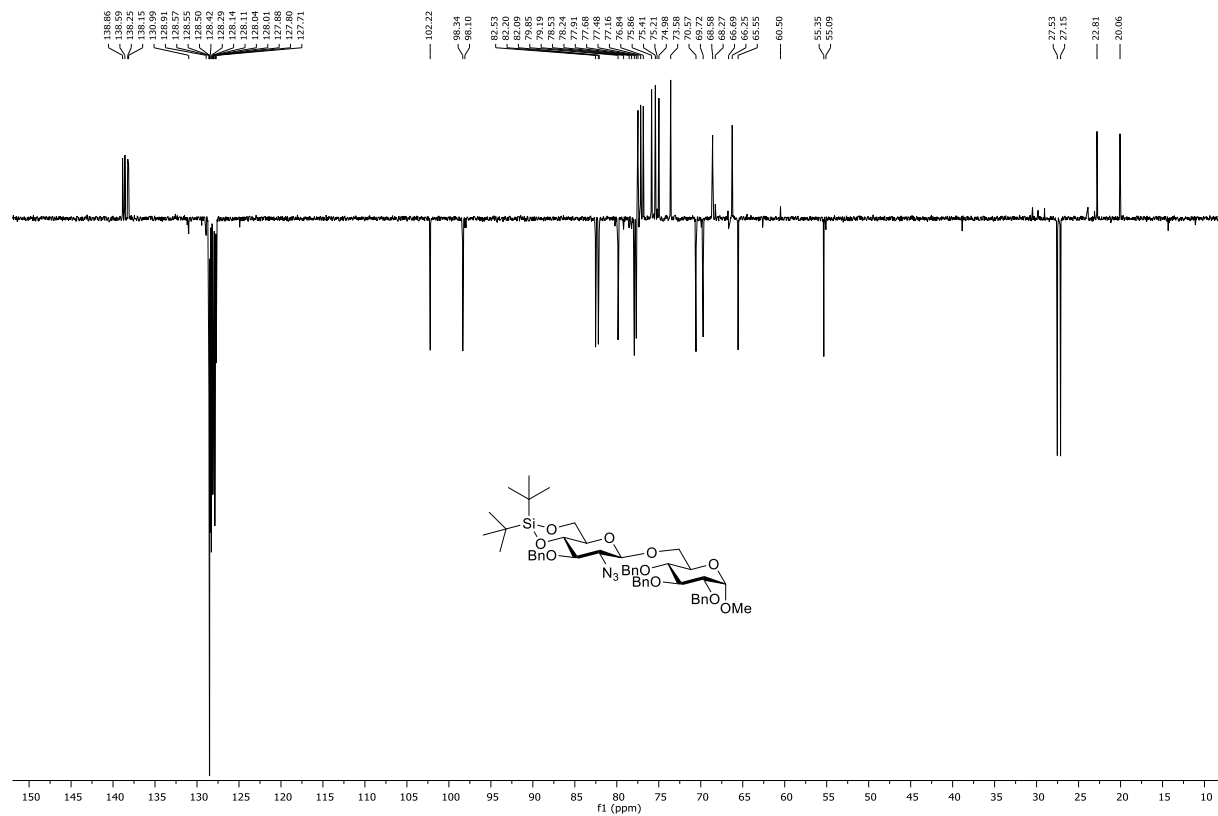

$^1\text{H}$ - $^1\text{H}$  COSY NMR

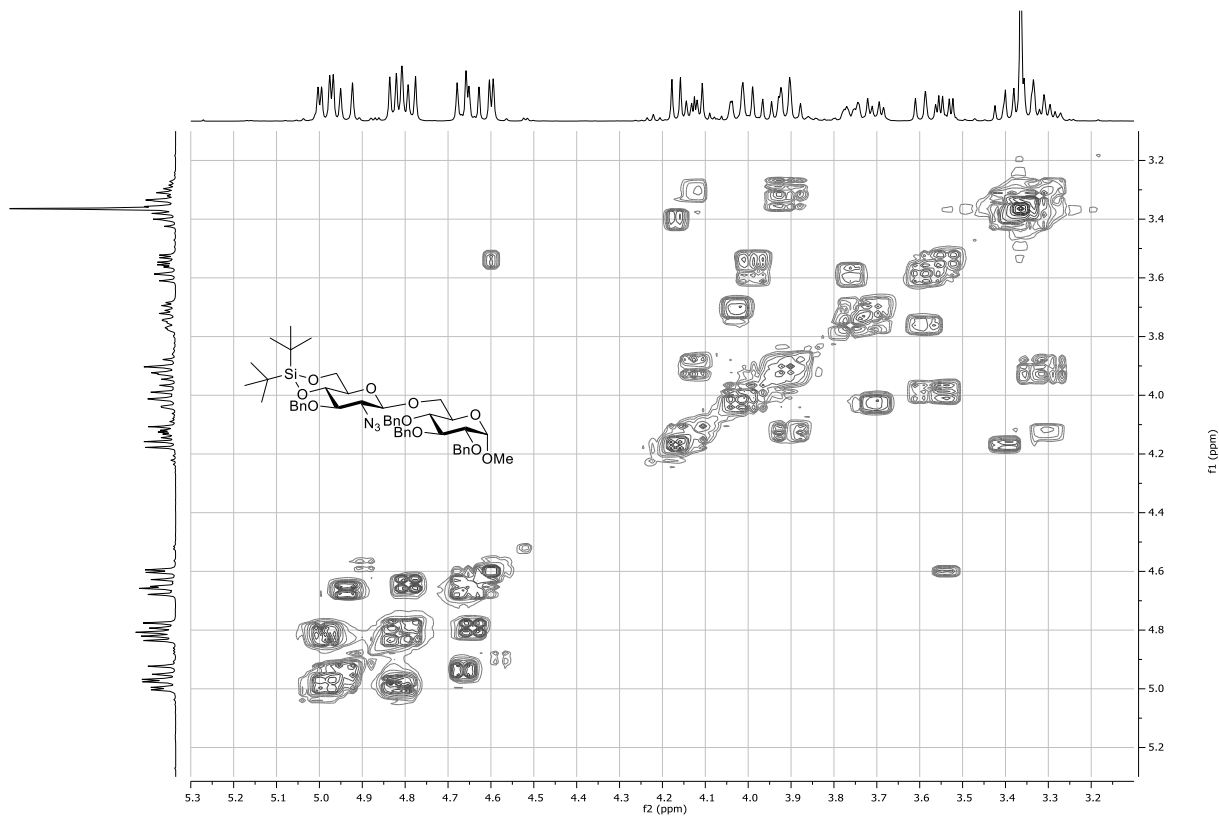

$^1\text{H}$ - $^{13}\text{C}$  HSQC NMR

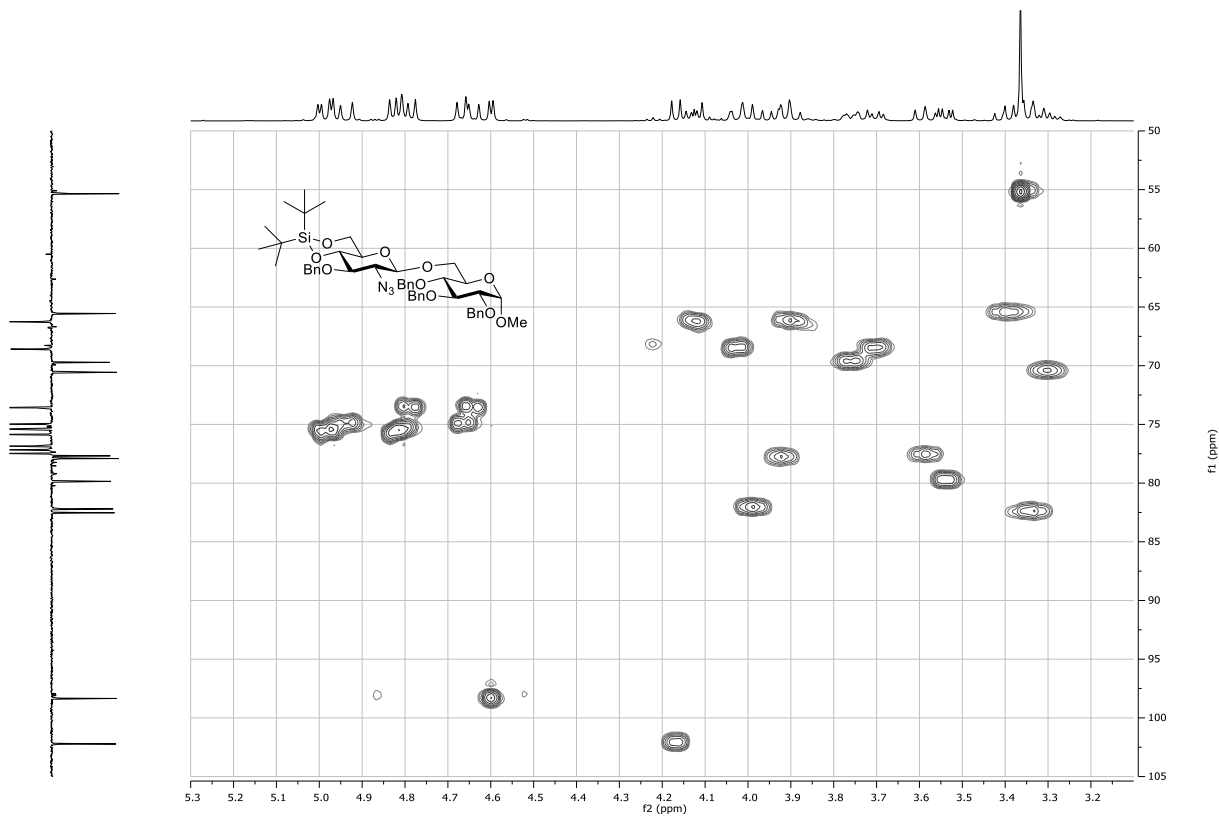

$^1\text{H}$ - $^{13}\text{C}$  HMBC NMR

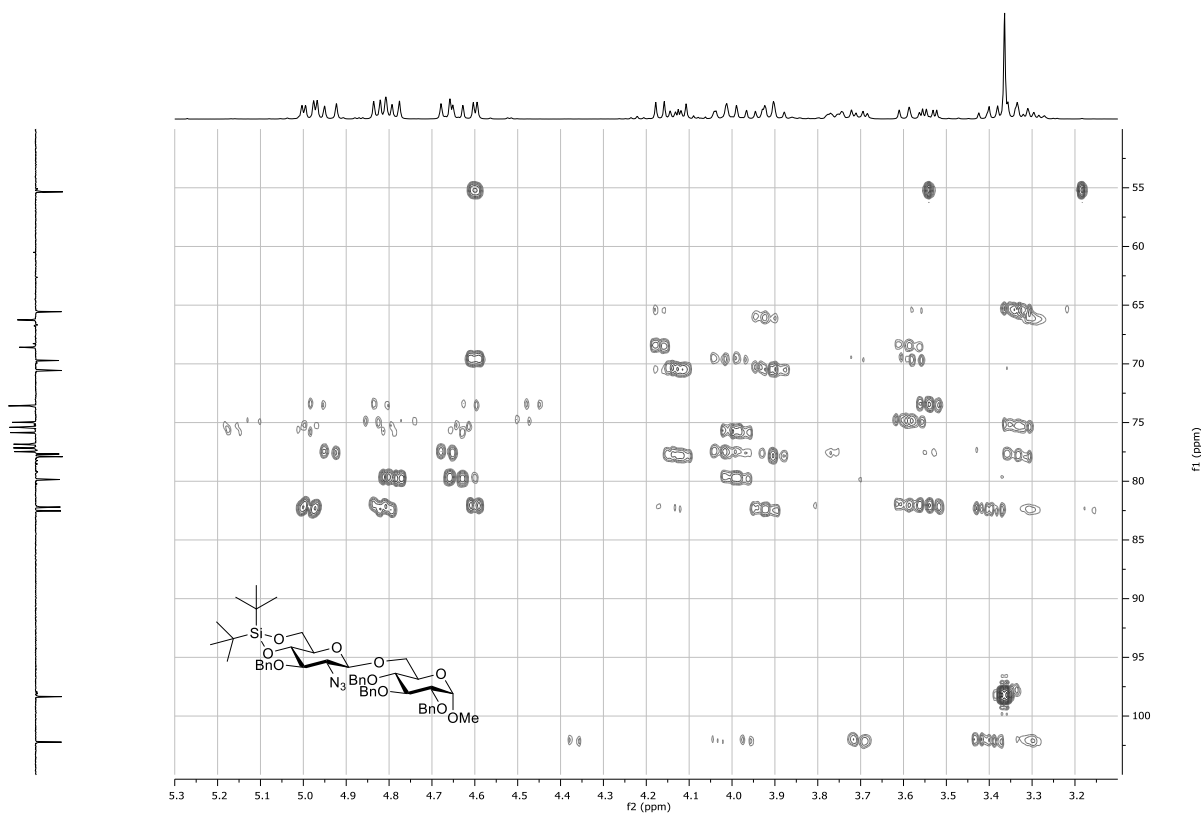

2-Fluoroethyl 2-azido-3-*O*-benzyl-2-deoxy-4,6-*O*-di-*tert*-butylsilylidene- $\alpha/\beta$ -D-glucopyranoside (**2D**).

$^1\text{H}$  NMR, 400 MHz,  $\text{CDCl}_3$

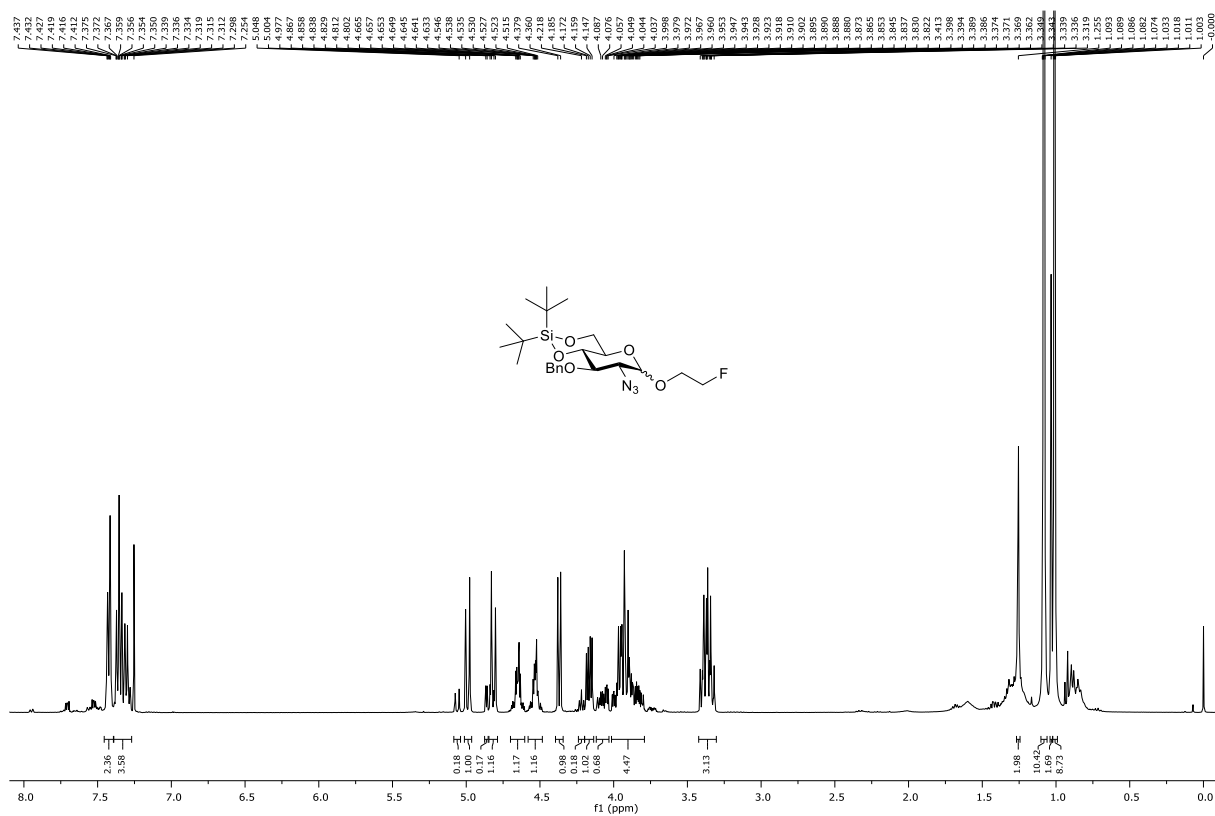



$^{13}\text{C}$ -APT NMR, 101 MHz,  $\text{CDCl}_3$

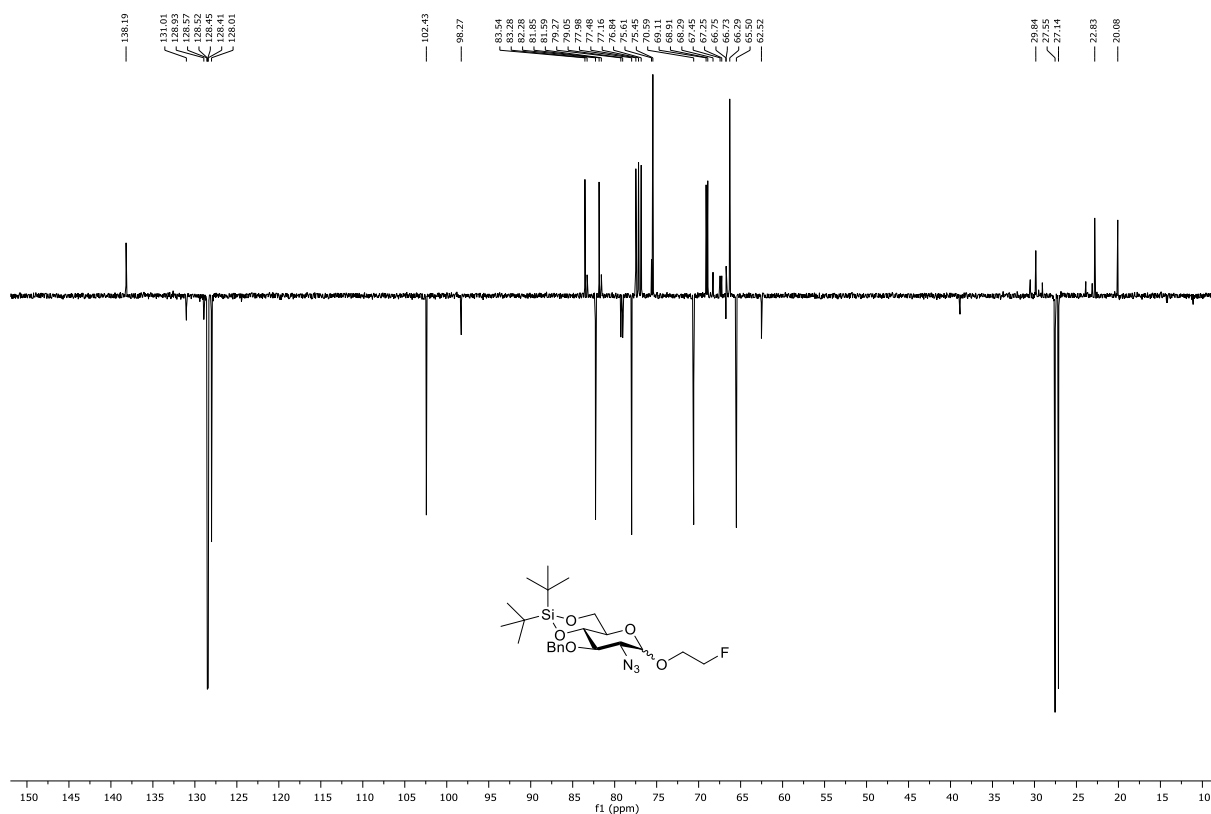

$^1\text{H}$ - $^1\text{H}$  COSY NMR

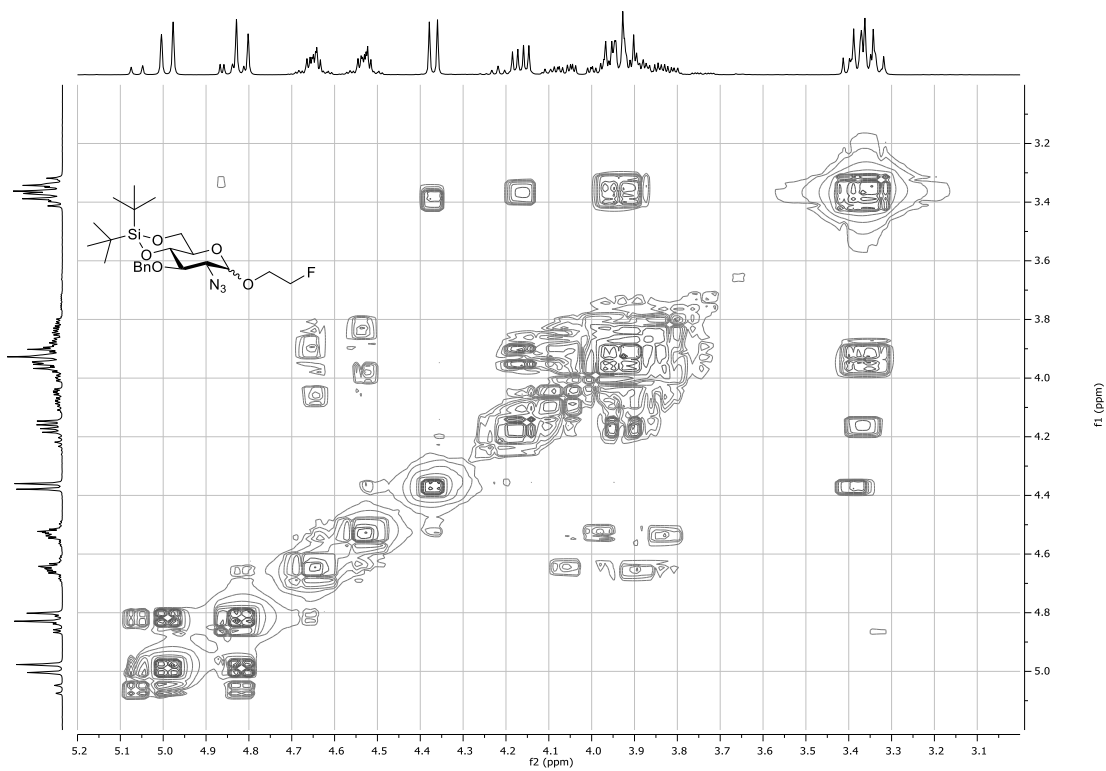

$^1\text{H}$ - $^{13}\text{C}$  HSQC NMR

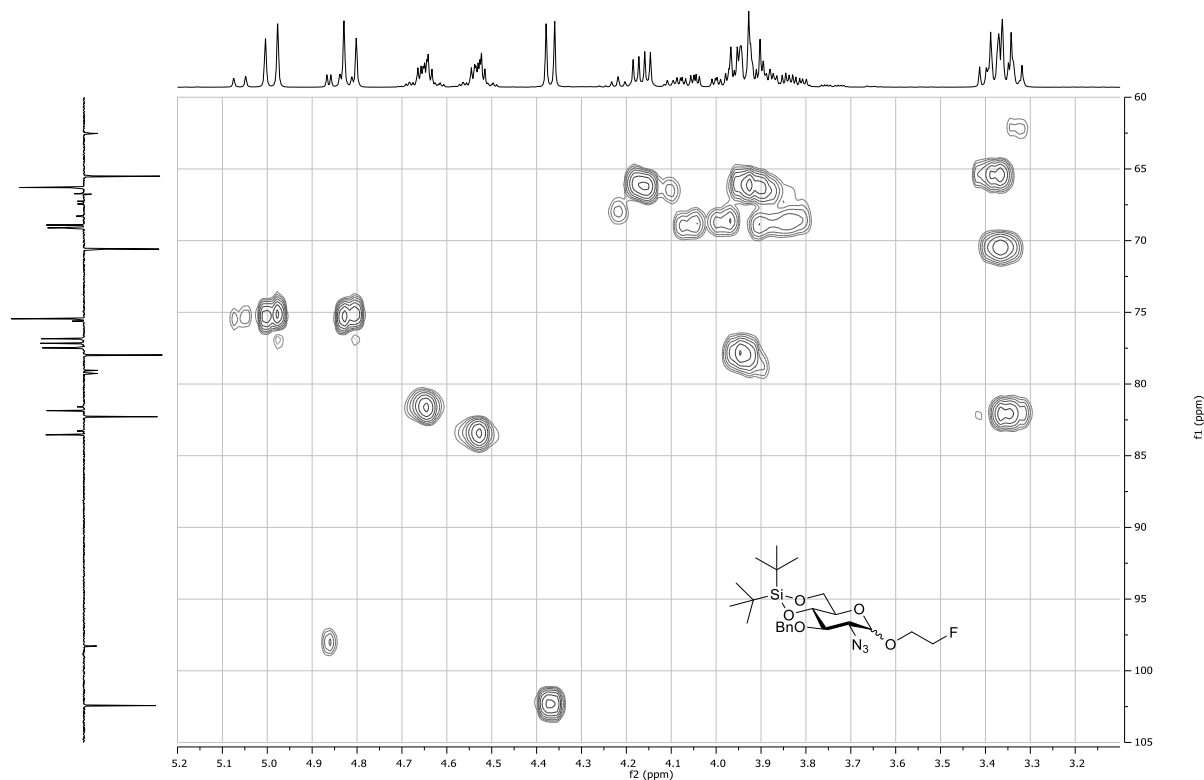

Methyl 4-O-(2-azido-3-O-benzyl-2-deoxy-4,6-O-di-*tert*-butylsilylidene- $\alpha$ / $\beta$ -D-glucopyranosyl)-2,3,6-tri-O-benzyl- $\alpha$ -D-glucopyranoside (**2E**).

$^1\text{H}$  NMR, 400 MHz,  $\text{CDCl}_3$

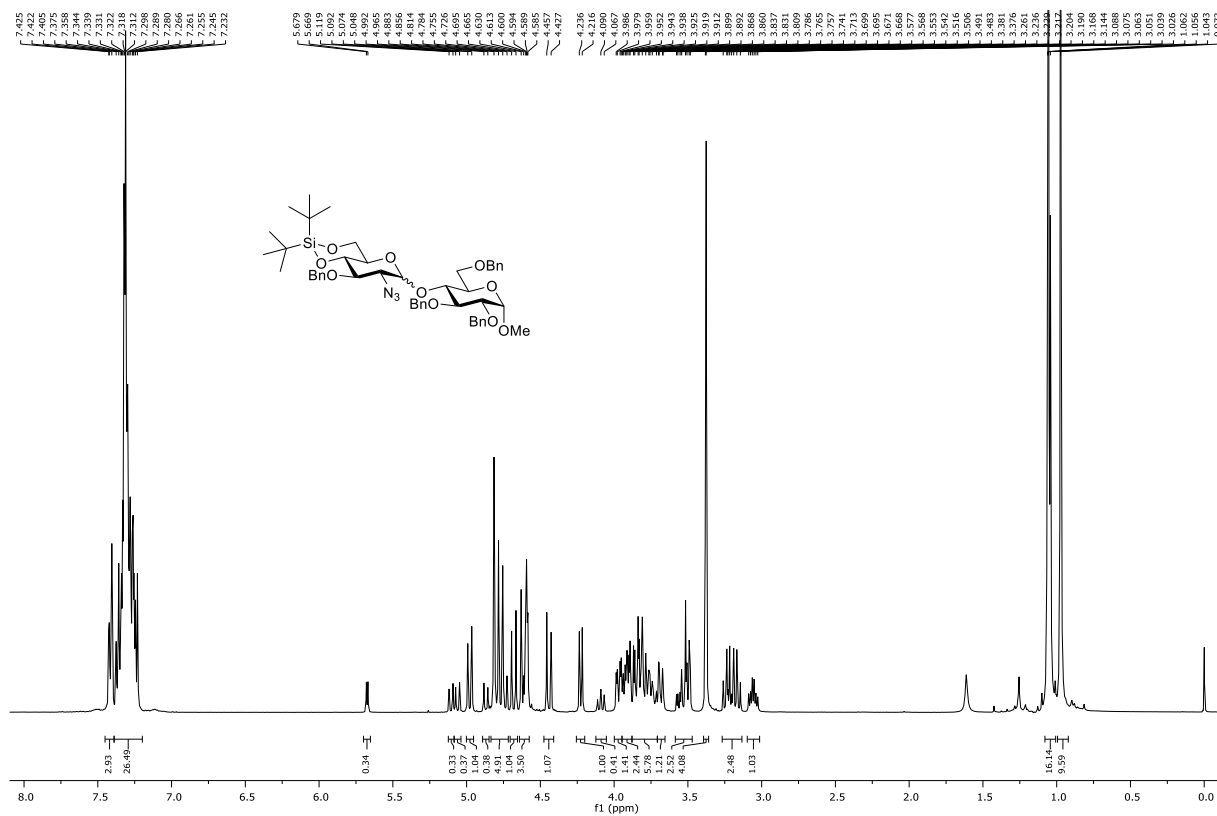

<sup>13</sup>C-APT NMR, 101 MHz, CDCl<sub>3</sub>

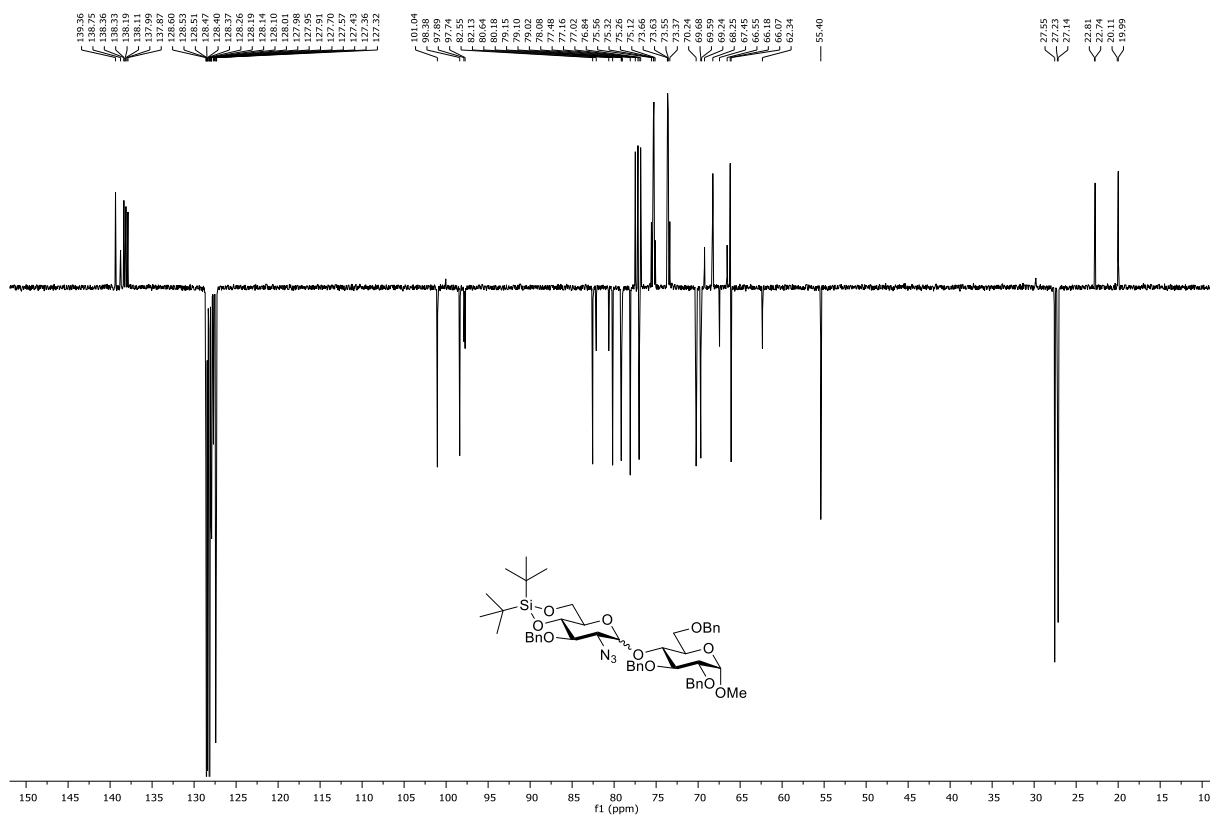

<sup>1</sup>H-<sup>1</sup>H COSY NMR

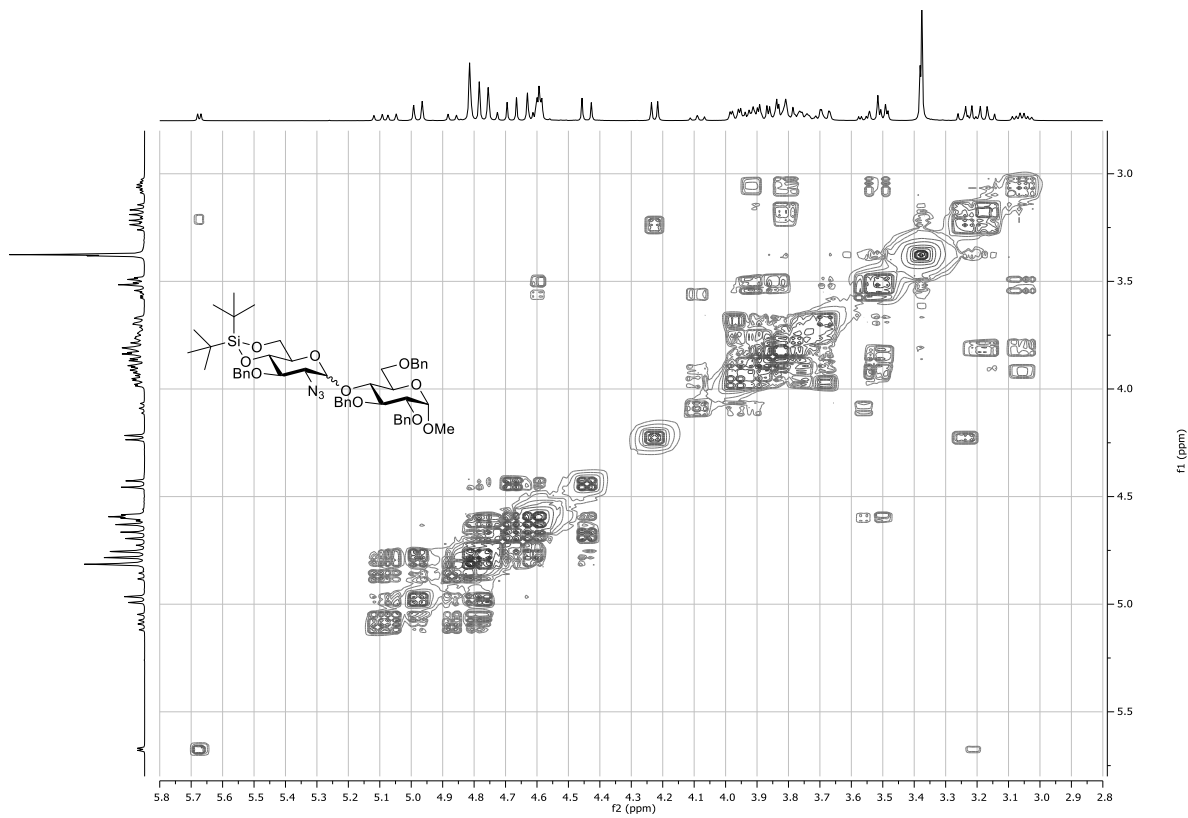

$^1\text{H}$ - $^{13}\text{C}$  HSQC NMR

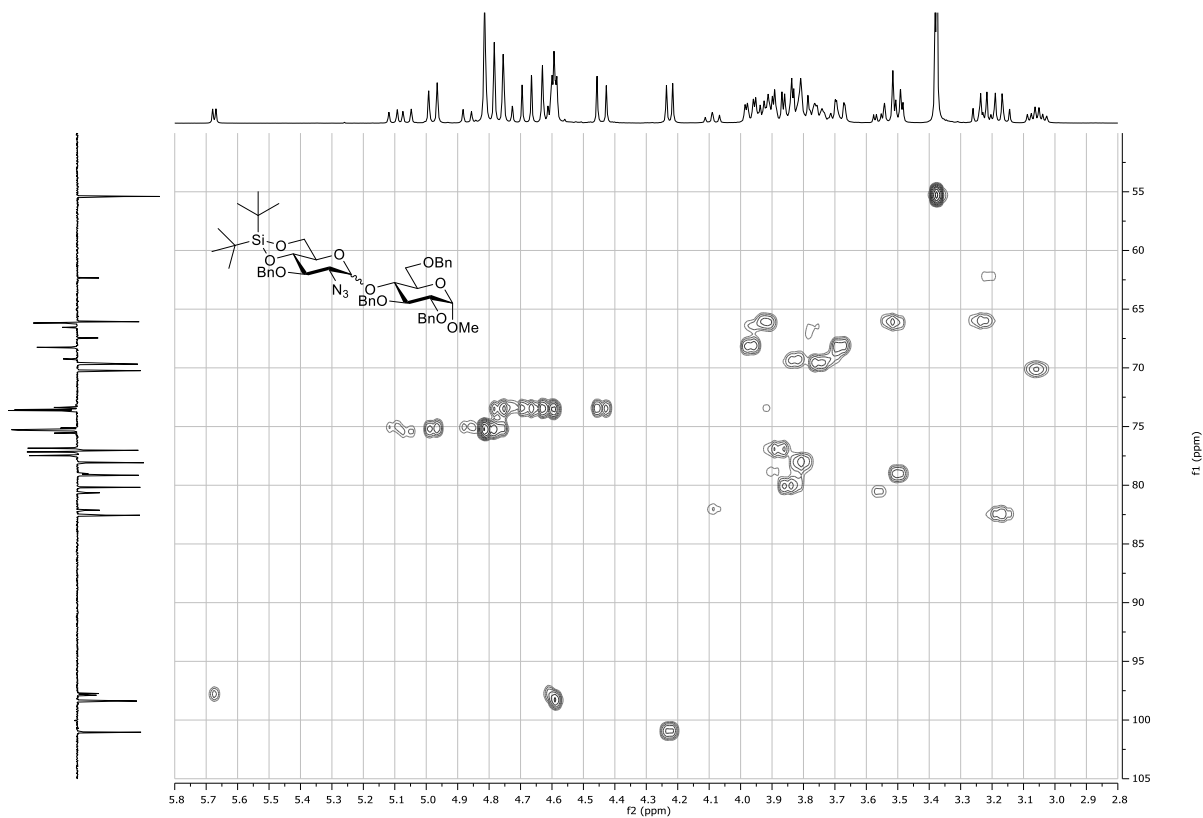

$^1\text{H}$ - $^{13}\text{C}$  HMBC NMR

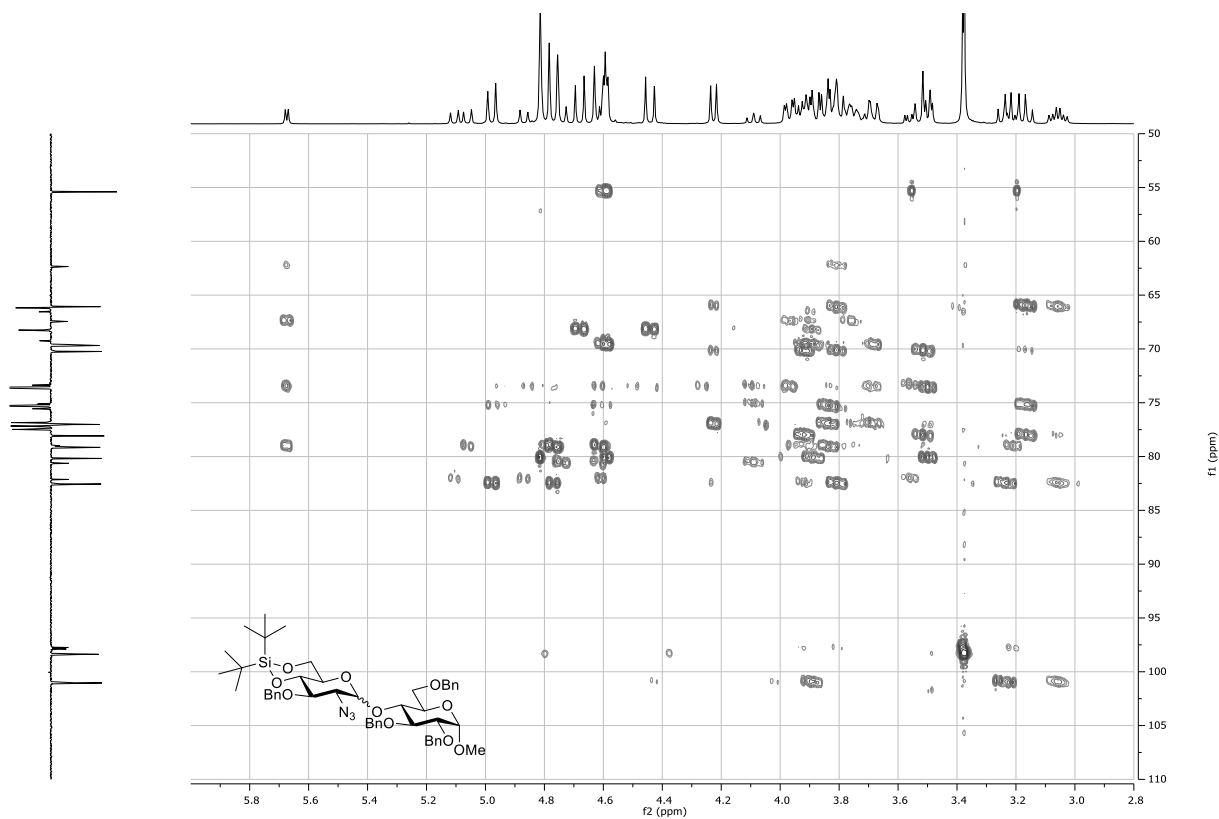

Methyl (methyl 4-*O*-[2-azido-3-*O*-benzyl-2-deoxy-4,6-*O*-di-*tert*-butylsilylidene- $\alpha$ / $\beta$ -D-glucopyranosyl]-2,3-di-*O*-benzyl- $\alpha$ -D-glucopyranosyl uronate) (2F).

$^1\text{H}$  NMR, 400 MHz,  $\text{CDCl}_3$

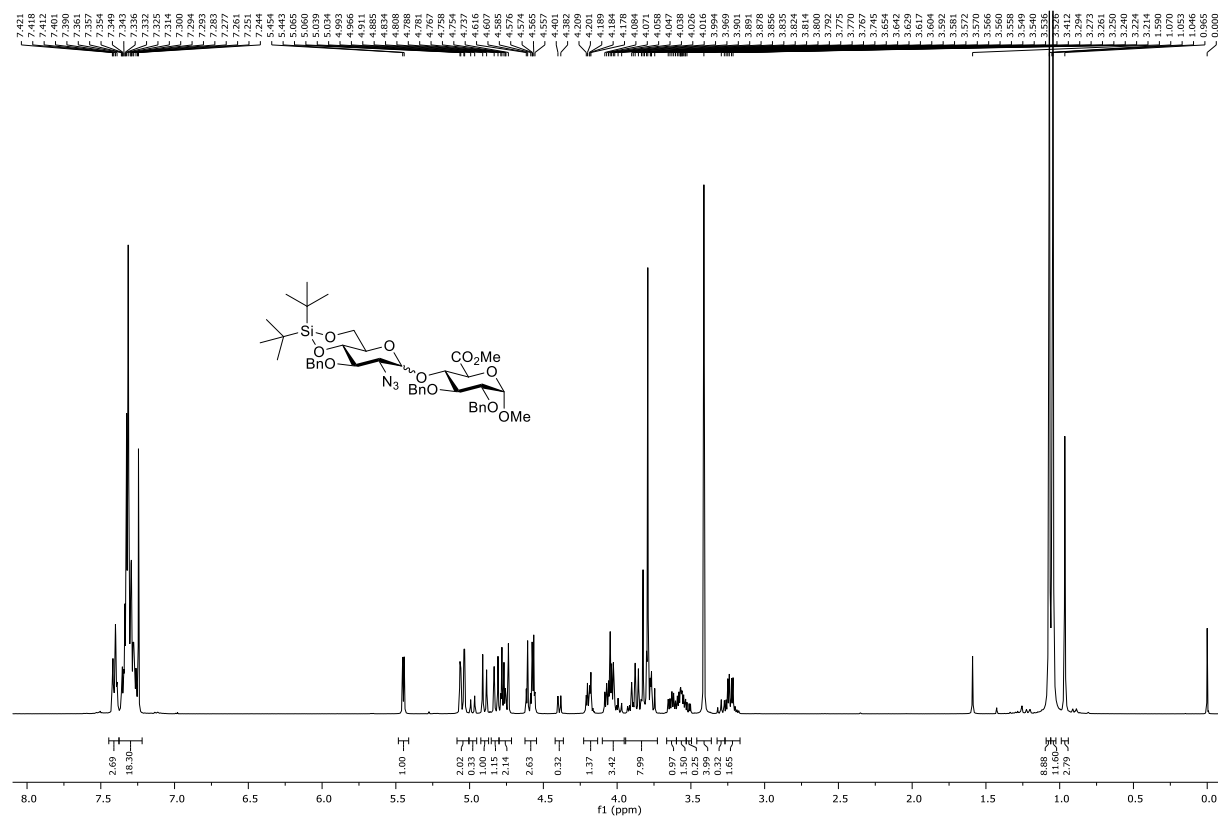

$^{13}\text{C}$ -APT NMR, 101 MHz,  $\text{CDCl}_3$

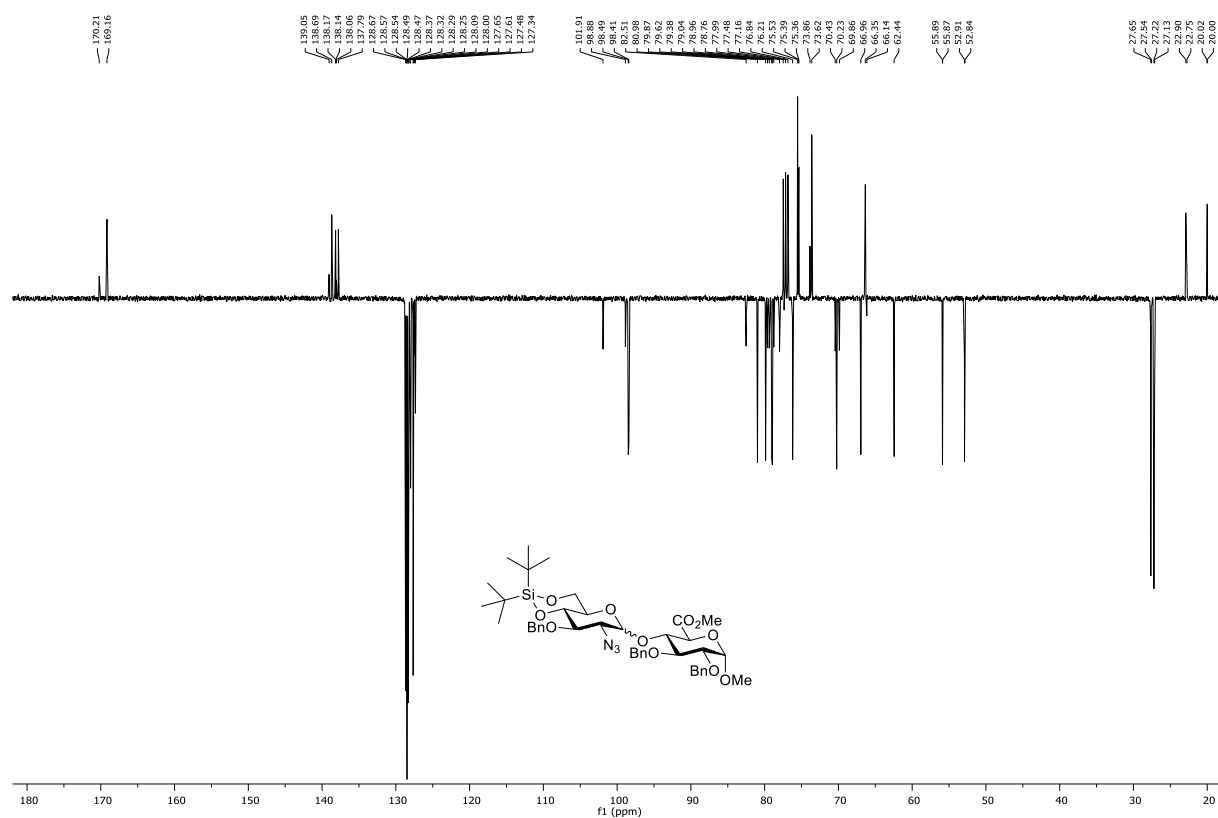

<sup>1</sup>H-<sup>1</sup>H COSY NMR

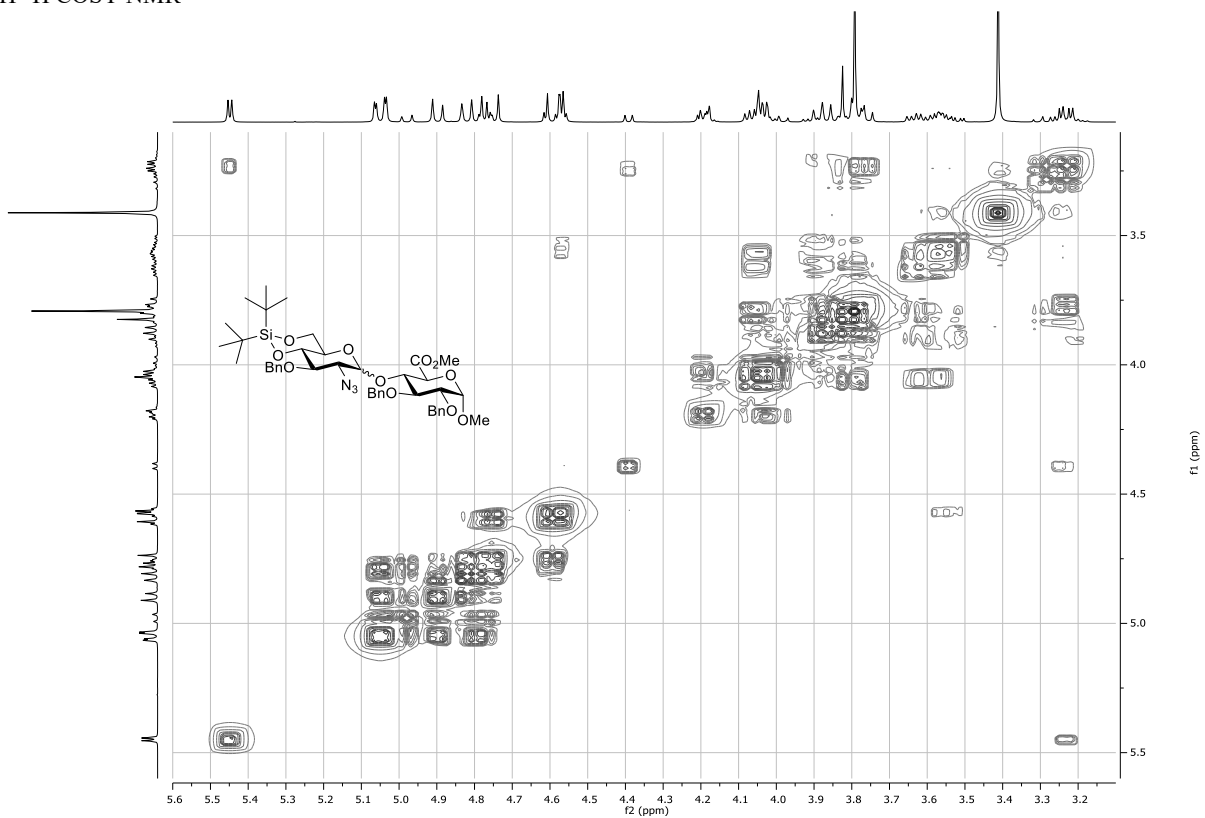

<sup>1</sup>H-<sup>13</sup>C HSQC NMR

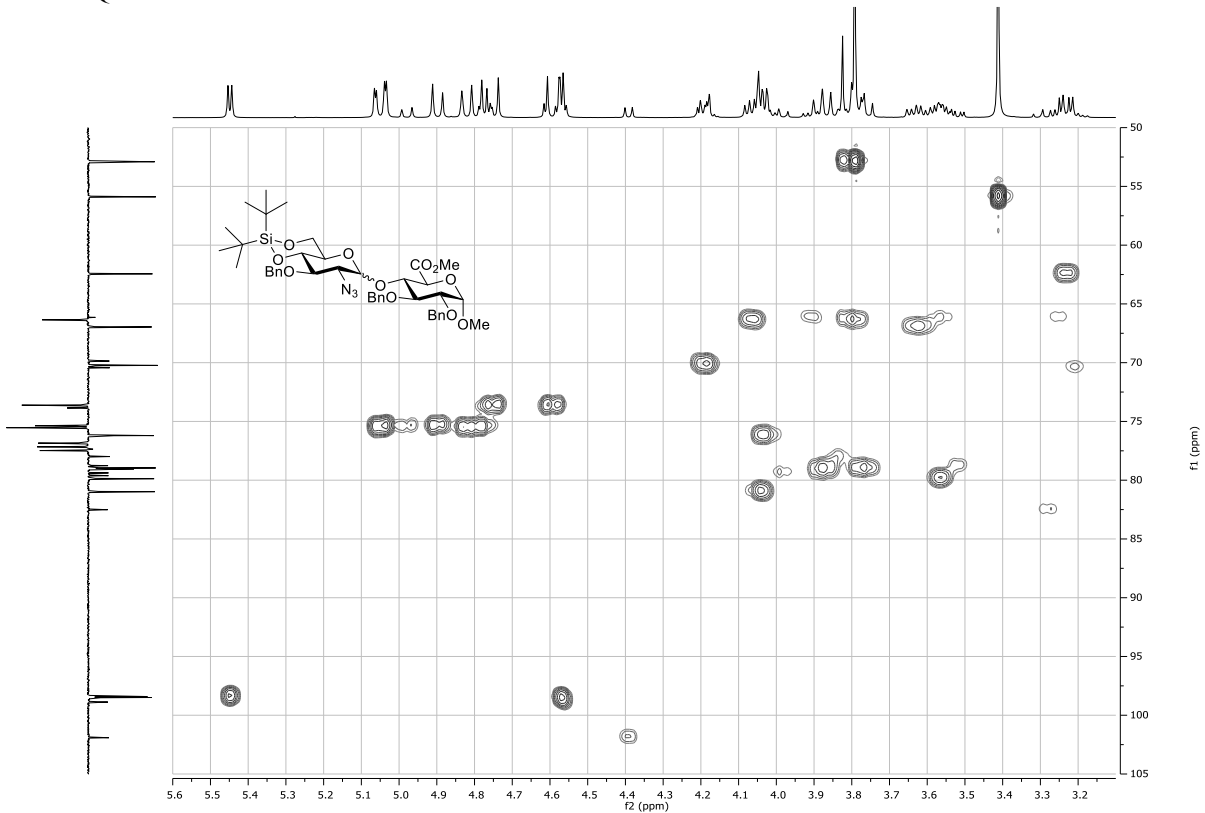

$^1\text{H}$ - $^{13}\text{C}$  HMBC NMR

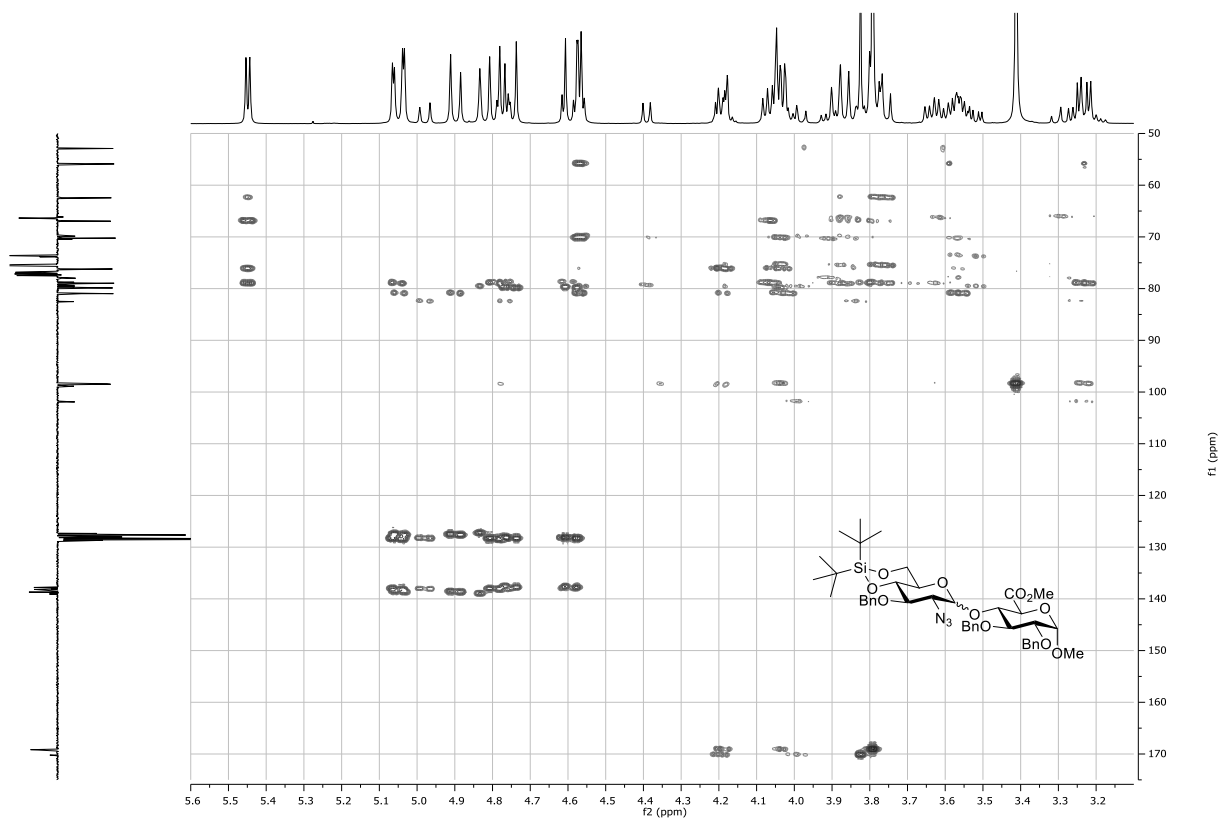

2,2-Difluoroethyl 2-azido-3-O-benzyl-2-deoxy-4,6-O-di-*tert*-butylsilylidene- $\alpha/\beta$ -D-glucopyranoside (**2G**).

$^1\text{H}$  NMR, 400 MHz,  $\text{CDCl}_3$

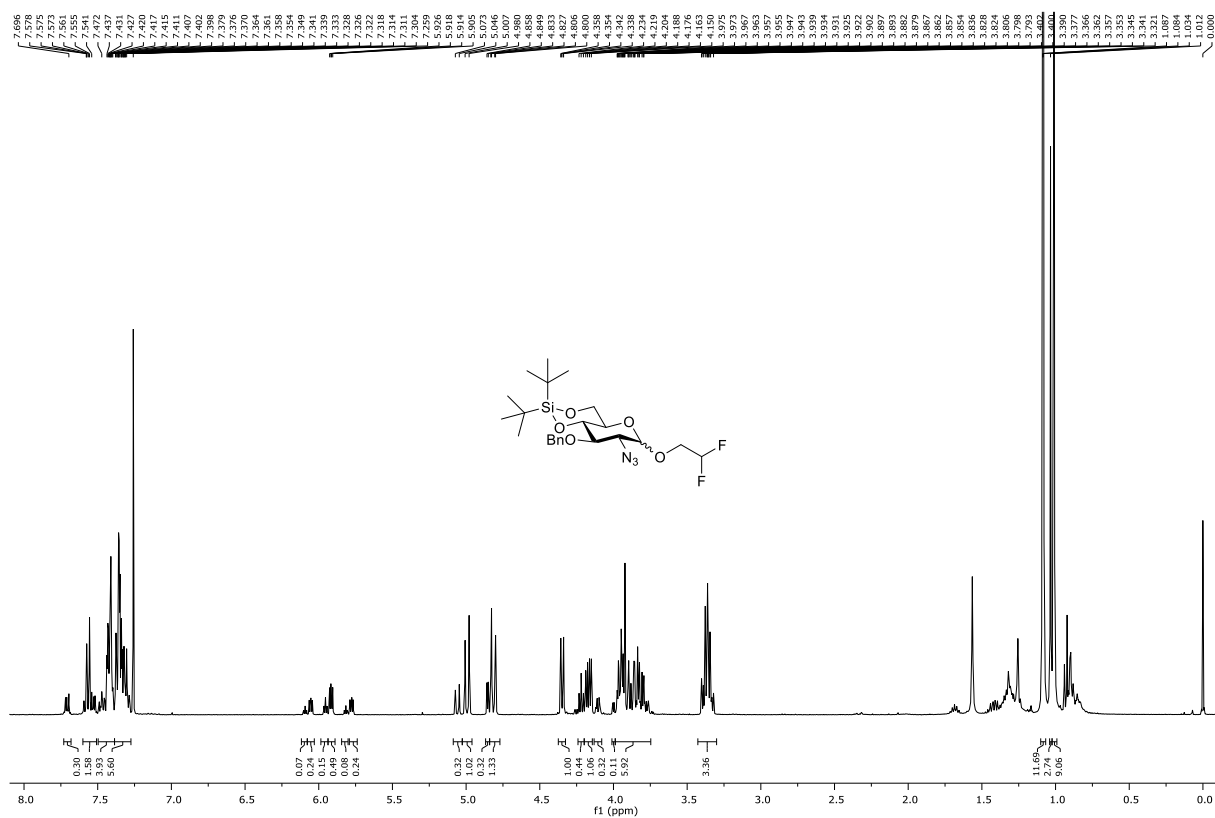

$^{13}\text{C}$ -APT NMR, 101 MHz,  $\text{CDCl}_3$

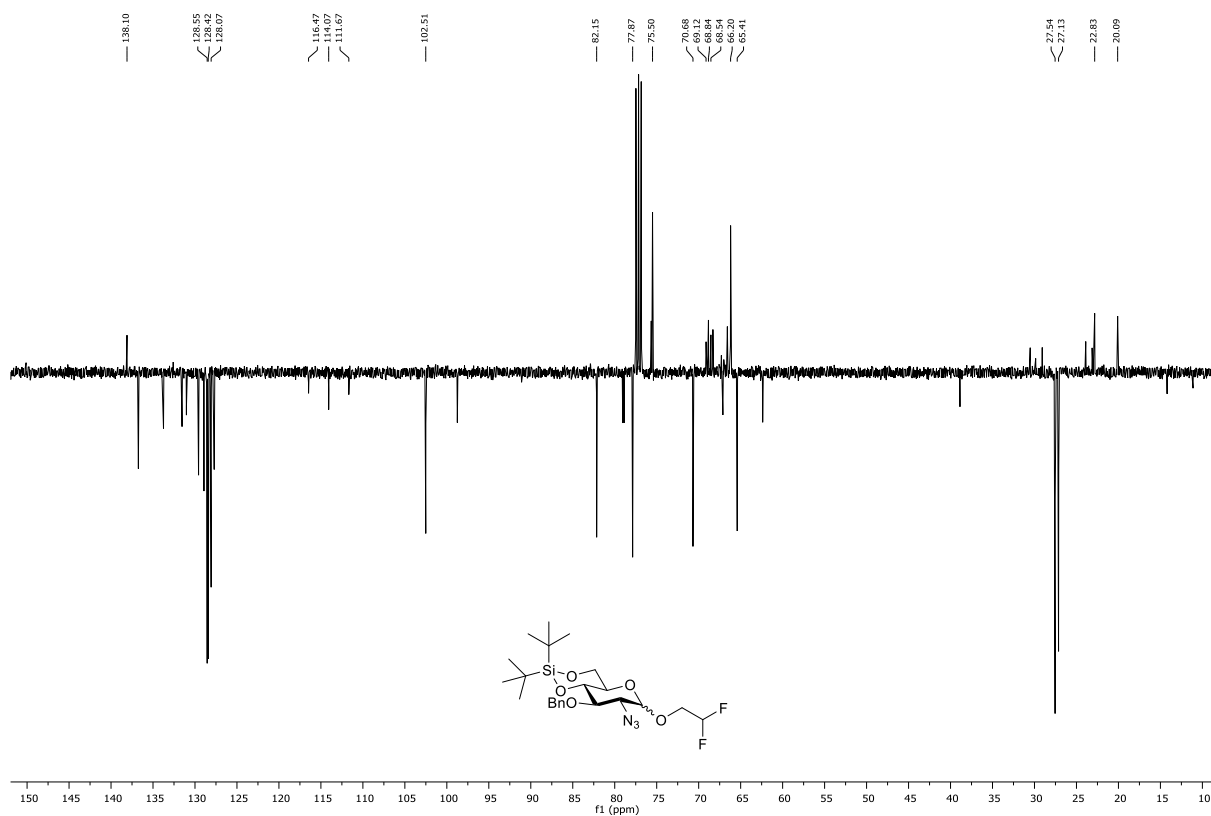

$^1\text{H}$ - $^1\text{H}$  COSY NMR

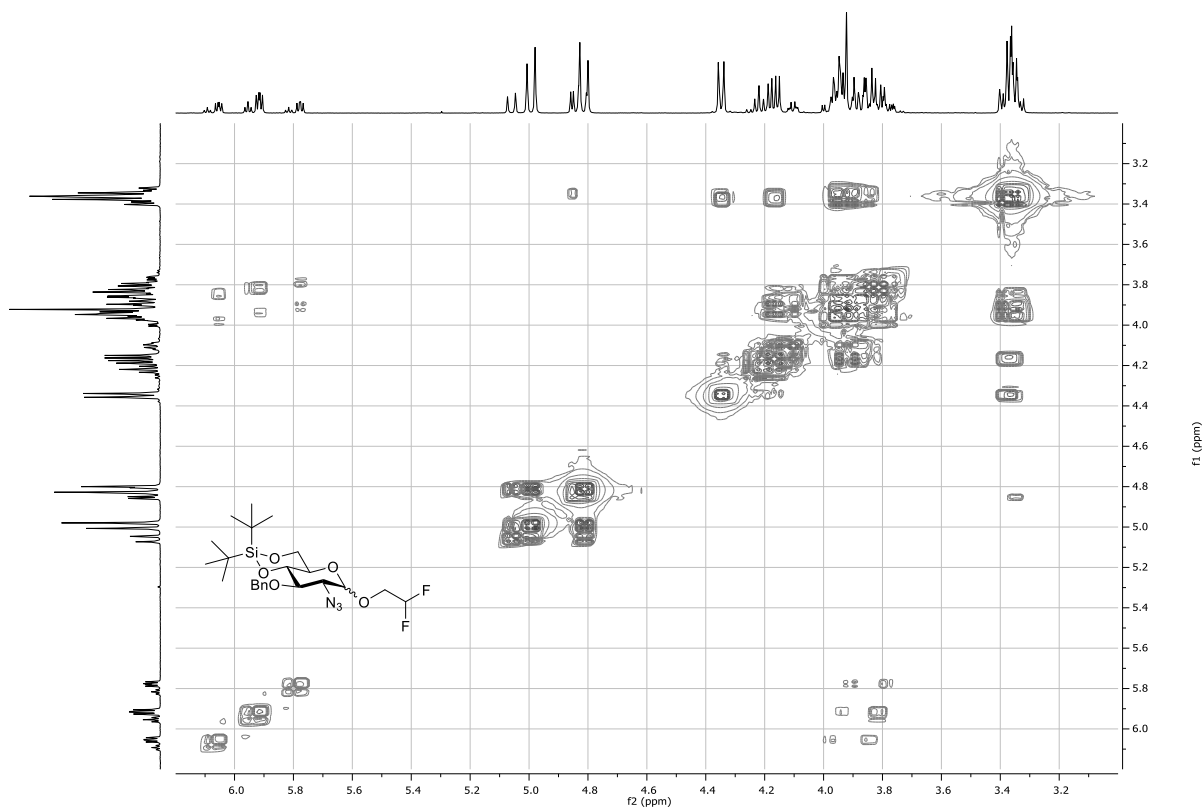



$^1\text{H}$ - $^{13}\text{C}$  HSQC NMR

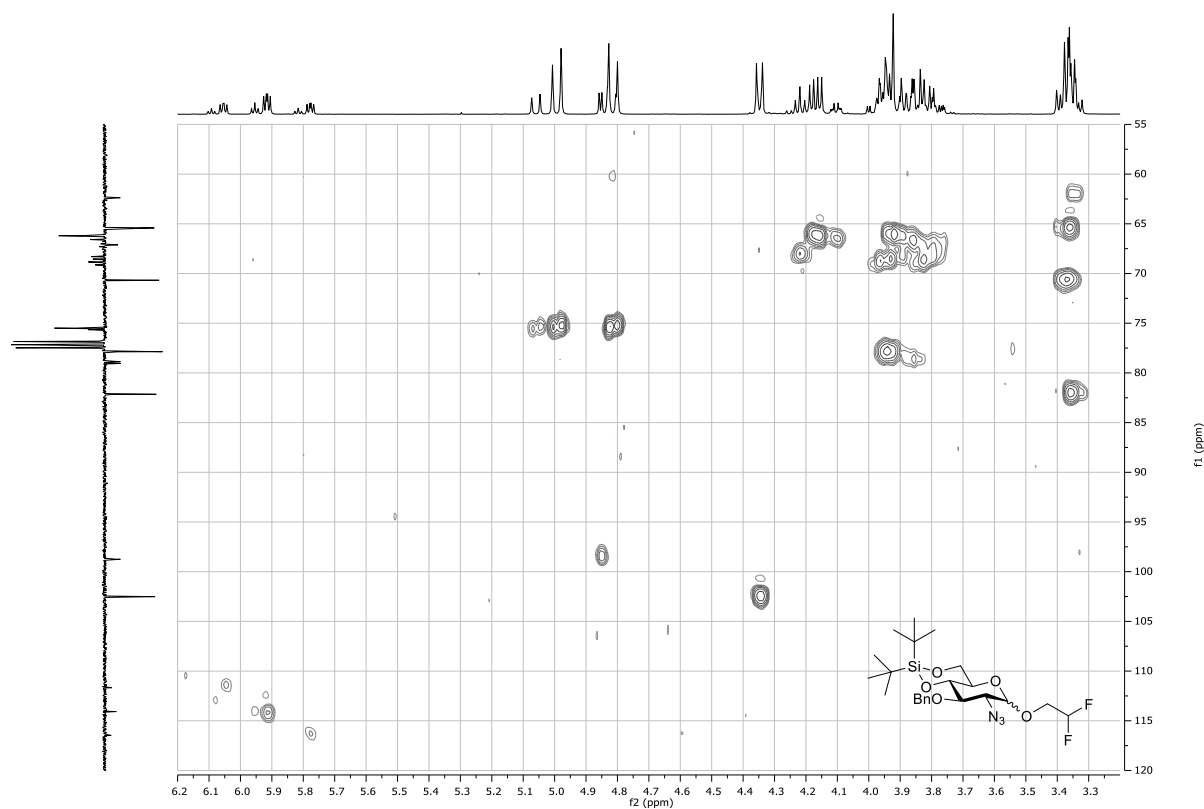

$^1\text{H}$  NMR, 400 MHz,  $\text{CDCl}_3$

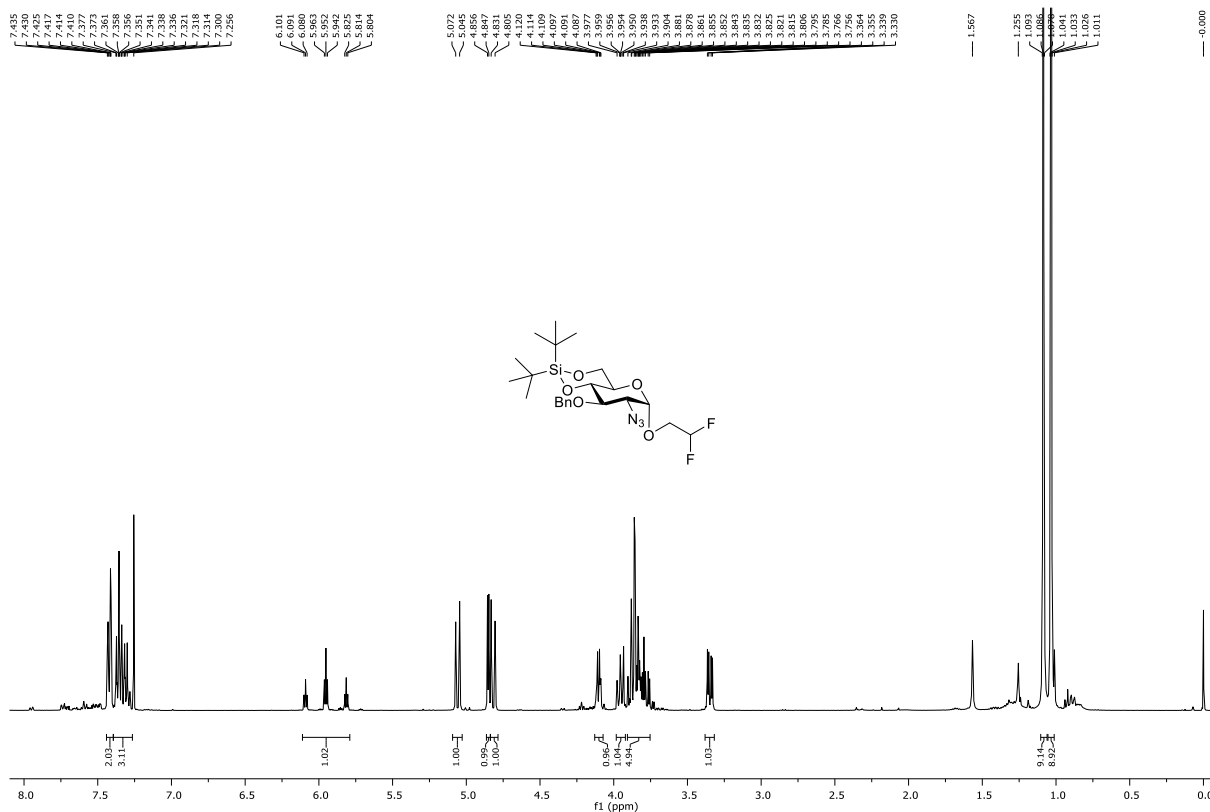

$^{13}\text{C}$ -APT NMR, 101 MHz,  $\text{CDCl}_3$

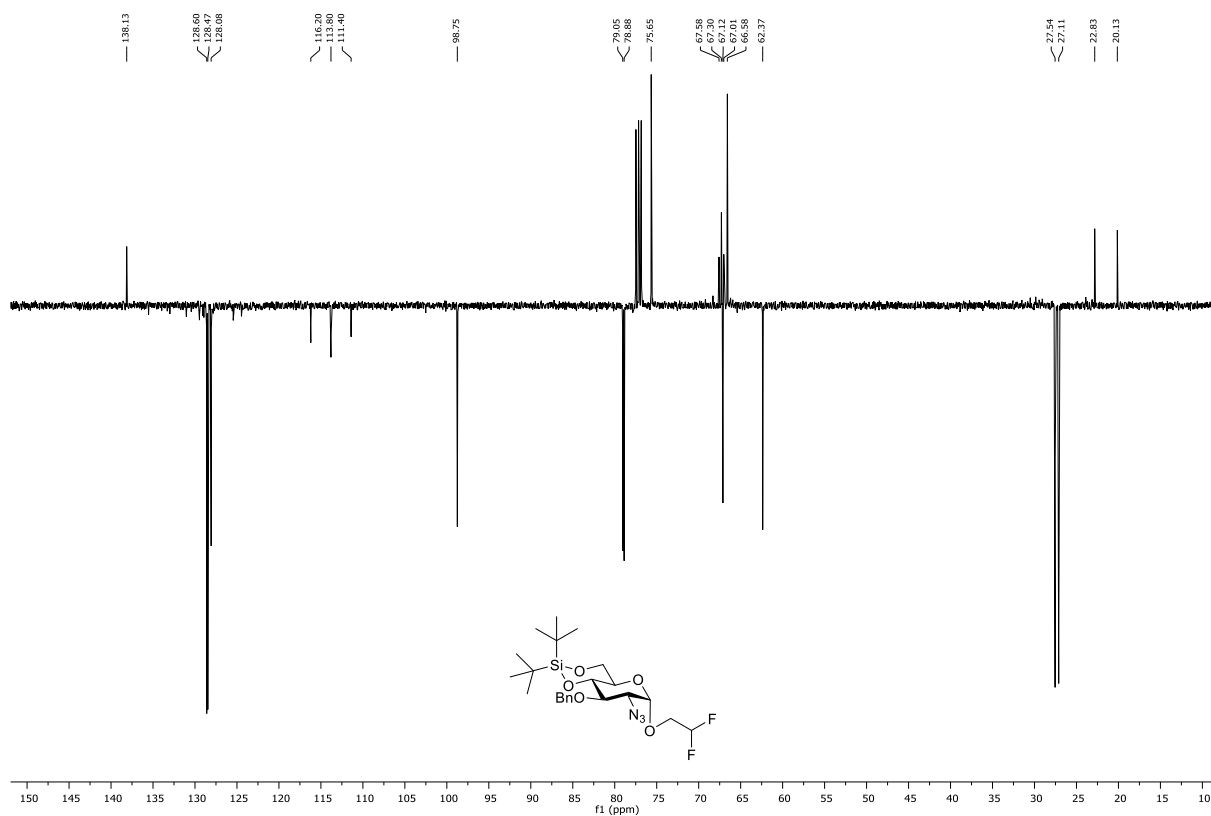

$^1\text{H}$ - $^1\text{H}$  COSY NMR

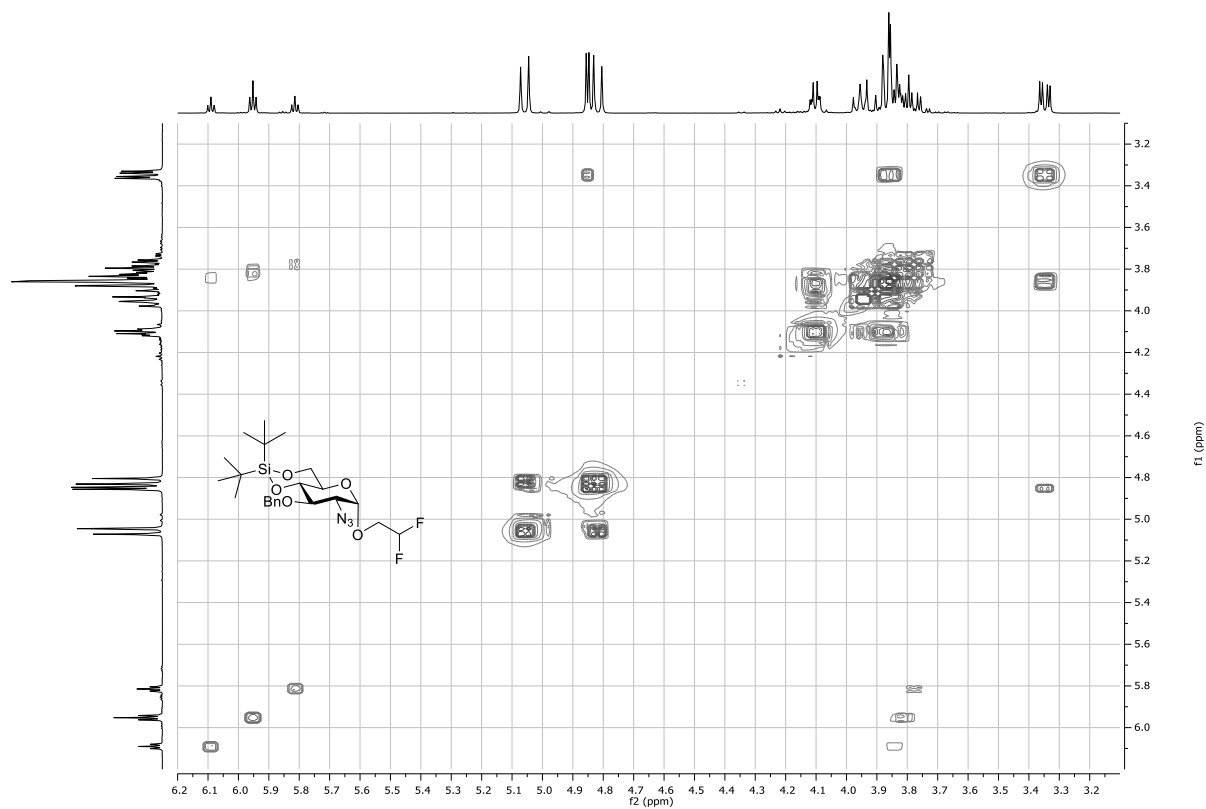

$^1\text{H}$ - $^{13}\text{C}$  HSQC NMR

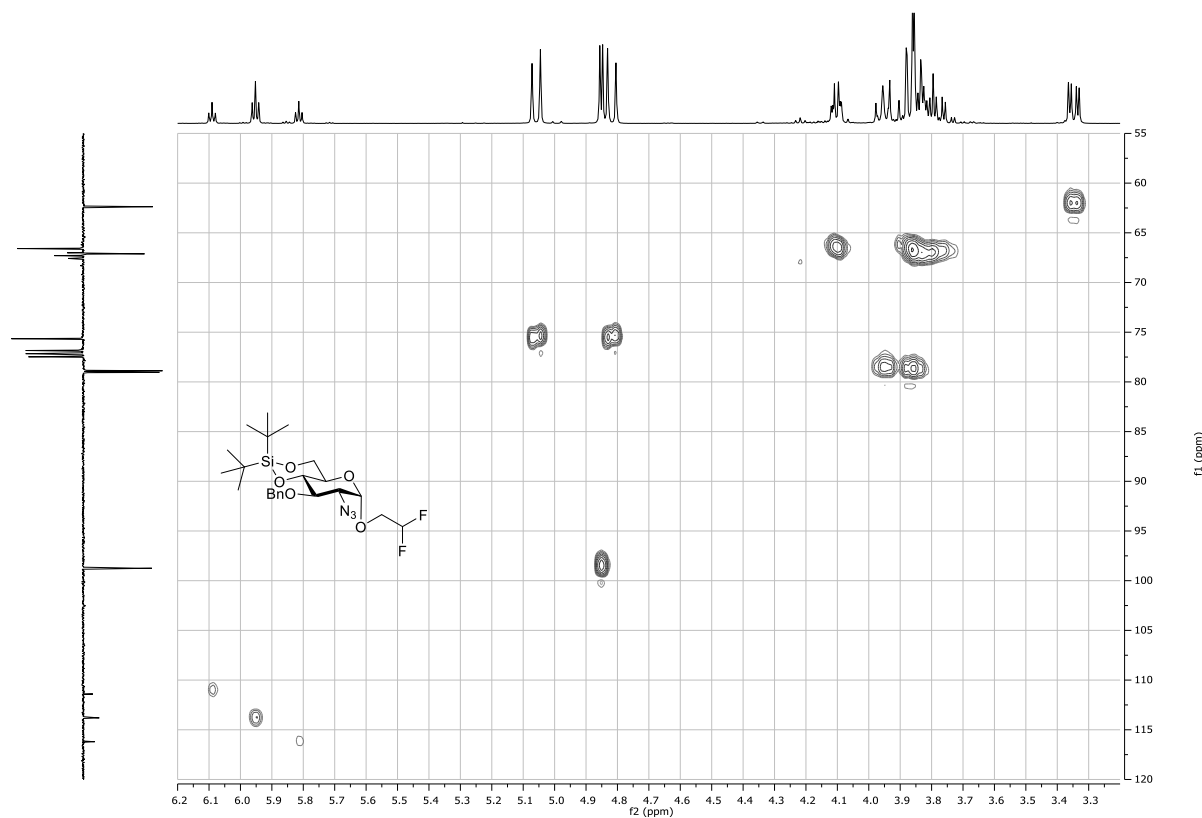

Methyl 4-*O*-(2-azido-3-*O*-benzyl-2-deoxy-4,6-*O*-di-*tert*-butylsilylidene- $\alpha$ -D-glucopyranosyl)-2,3,6-tri-*O*-benzyl- $\beta$ -D-galactopyranoside (**2H**).

$^1\text{H}$  NMR, 400 MHz,  $\text{CDCl}_3$

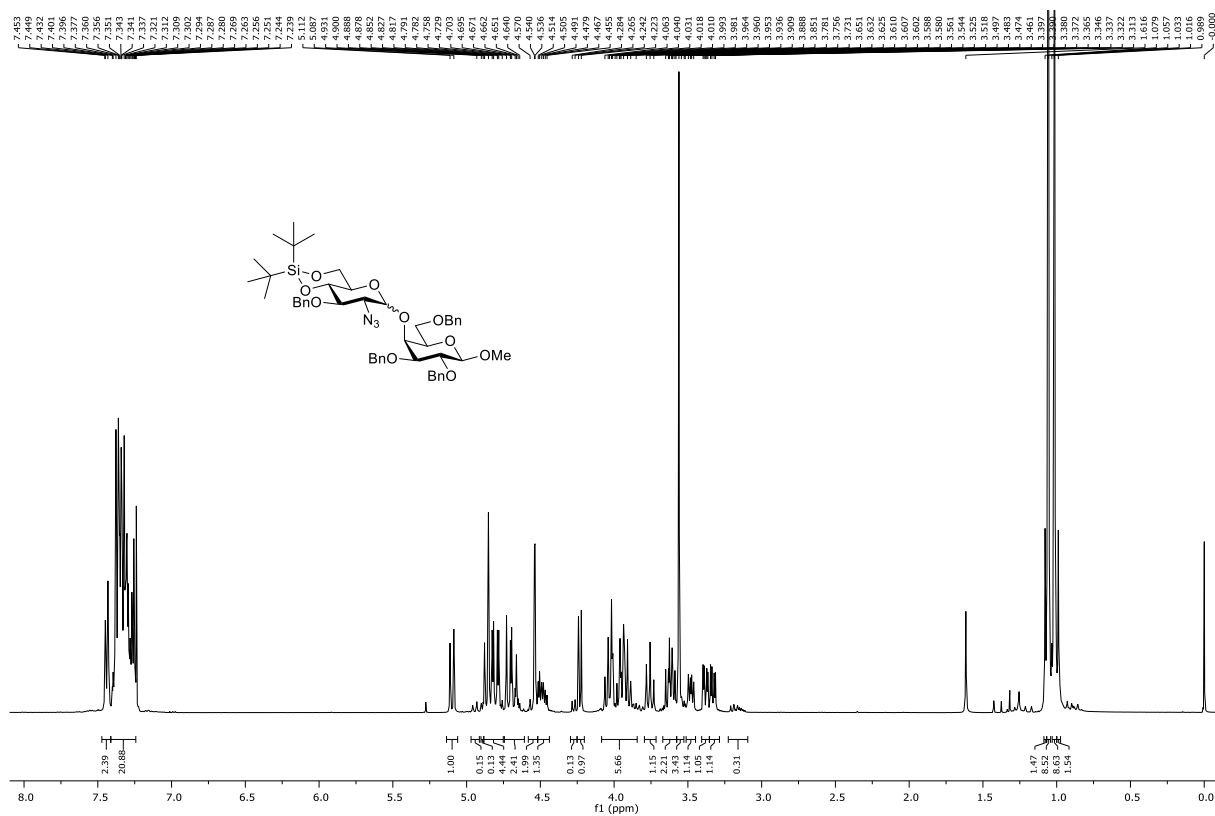

$^{13}\text{C}$ -APT NMR, 101 MHz,  $\text{CDCl}_3$

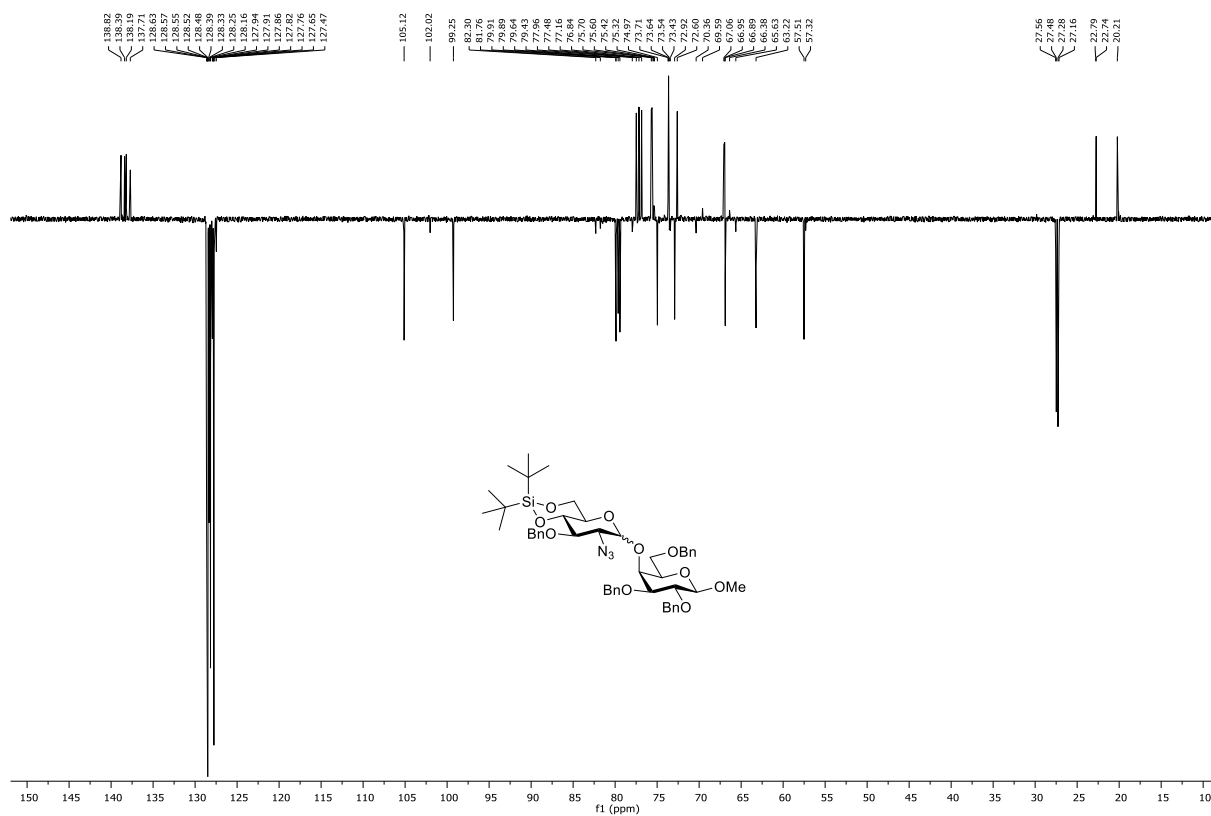

$^1\text{H}$ - $^1\text{H}$  COSY NMR

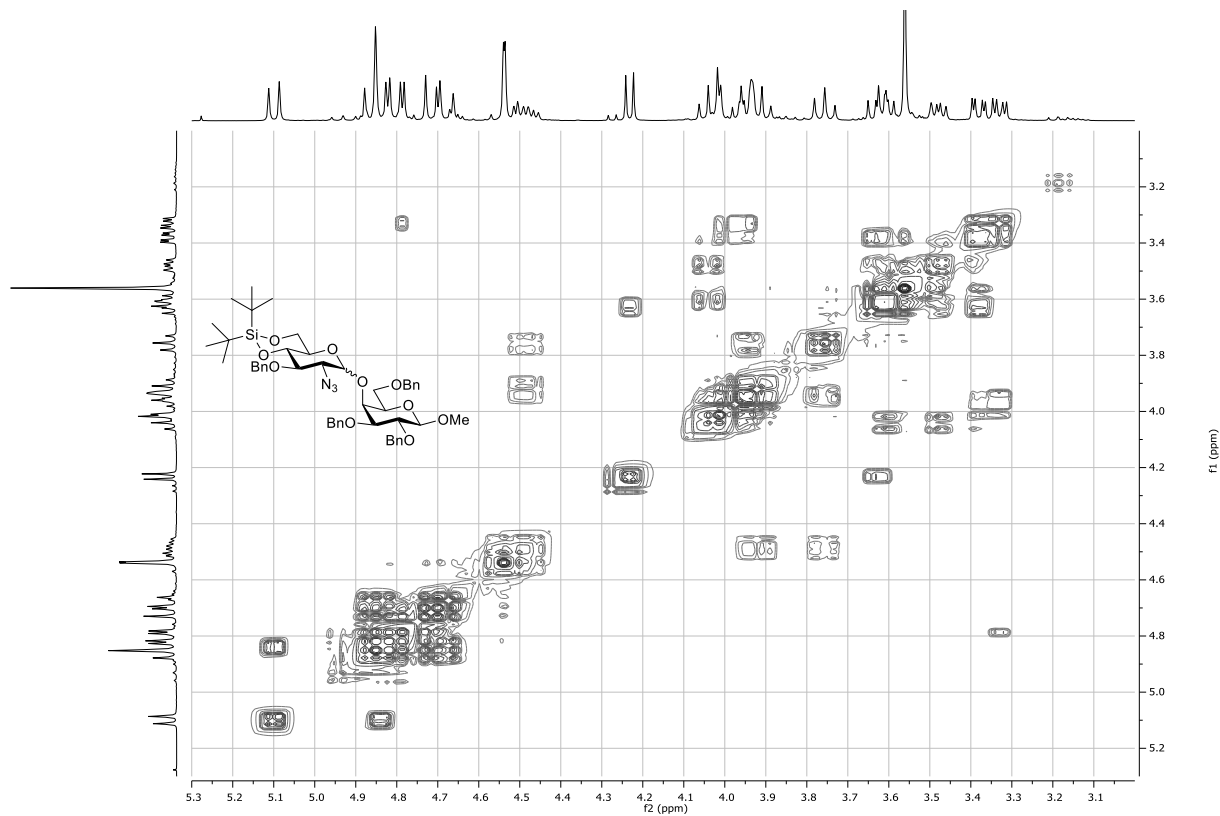

$^1\text{H}$ - $^{13}\text{C}$  HSQC NMR

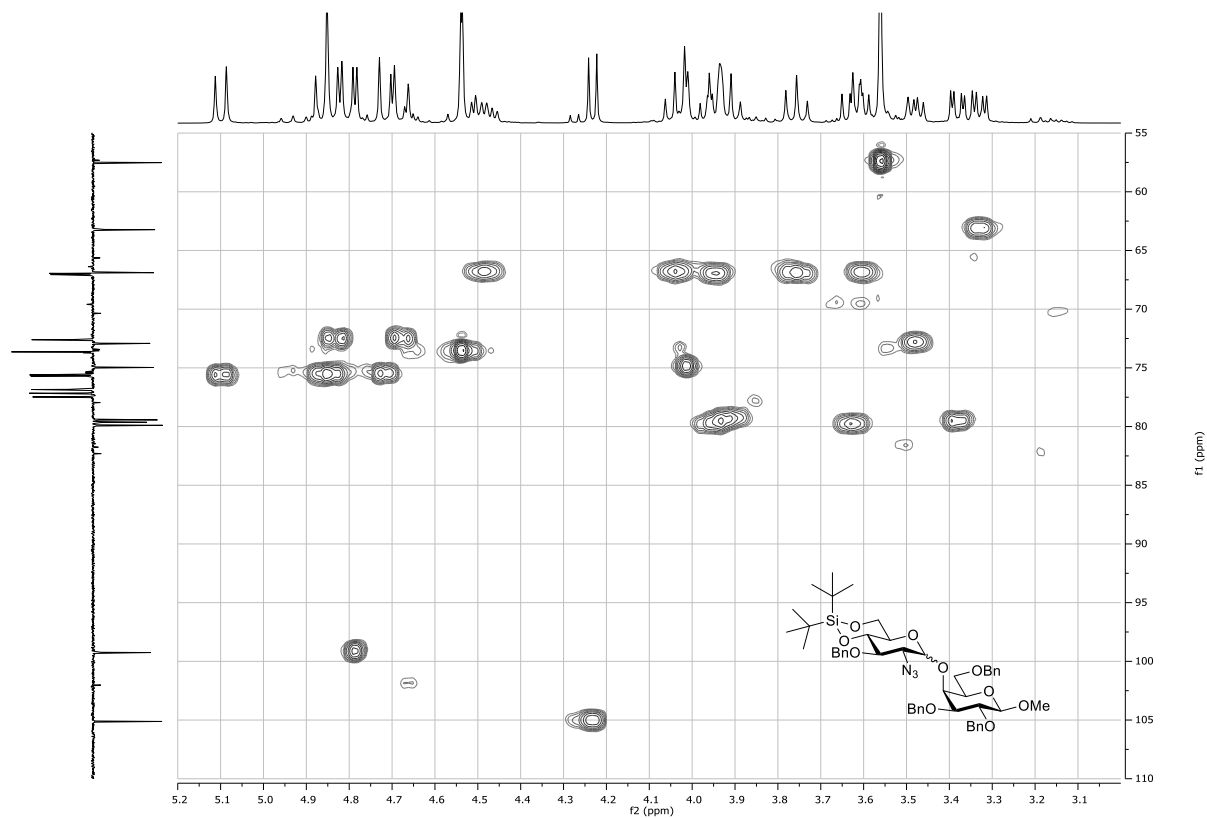

$^1\text{H}$ - $^{13}\text{C}$  HMBC NMR

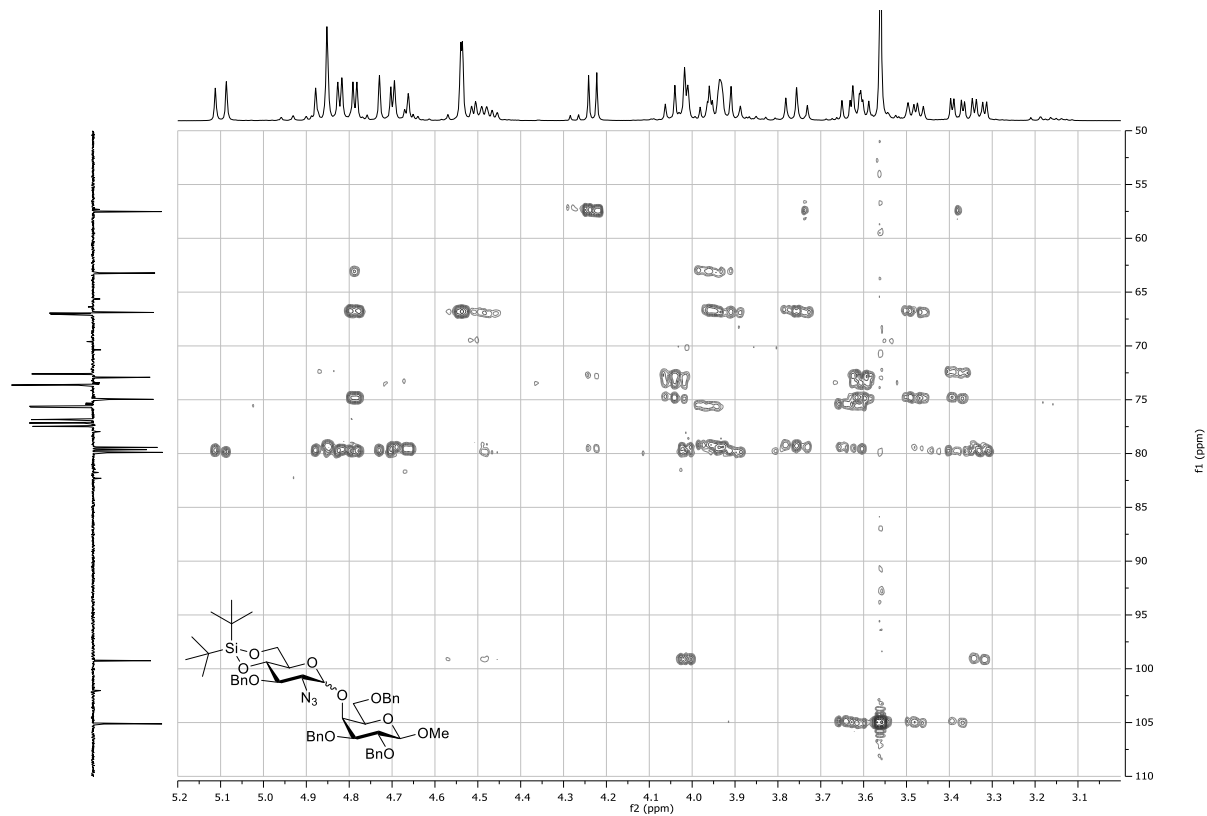

Methyl 2-*O*-(2-azido-3-*O*-benzyl-2-deoxy-4,6-*O*-di-*tert*-butylsilylidene- $\alpha$ -D-glucopyranosyl)-3-*O*-benzyl-4,6-*O*-benzylidene- $\alpha$ -D-mannopyranoside (**21**).

$^1\text{H}$  NMR, 400 MHz,  $\text{CDCl}_3$

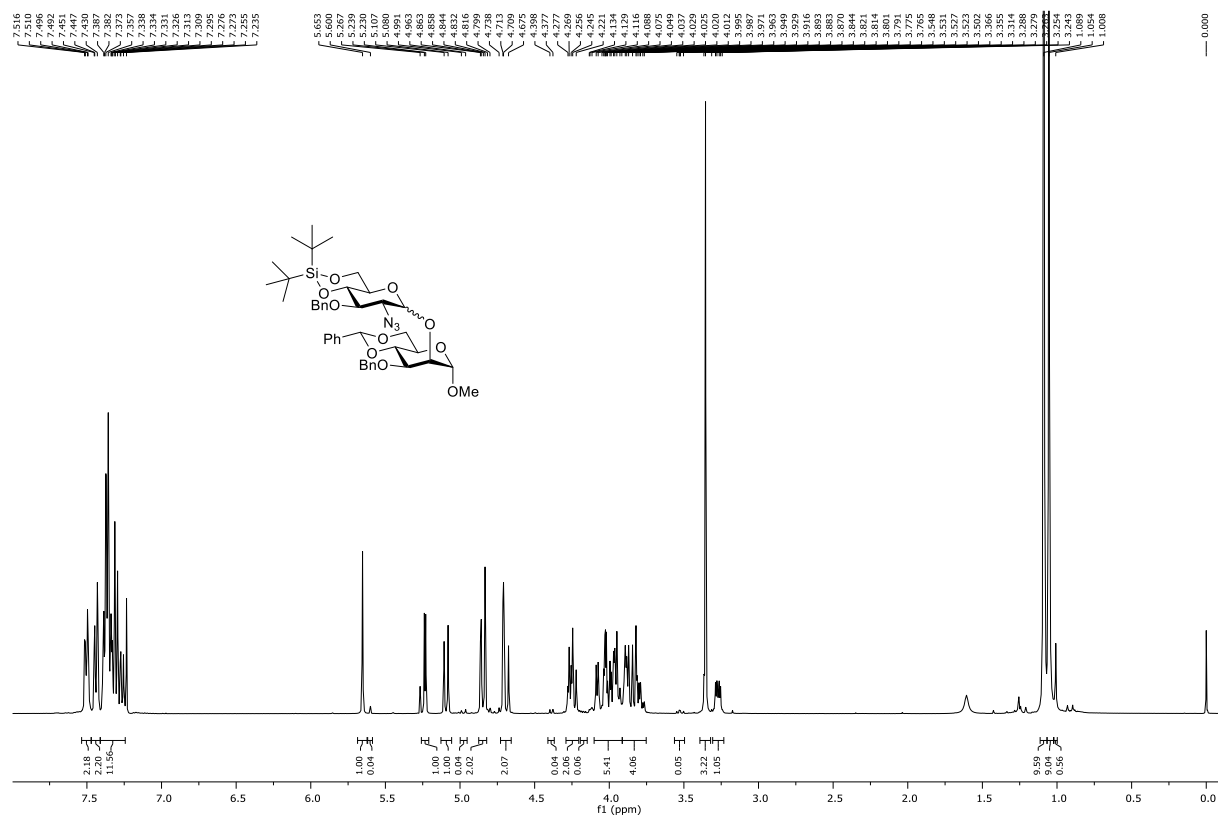

$^{13}\text{C}$ -APT NMR, 101 MHz,  $\text{CDCl}_3$

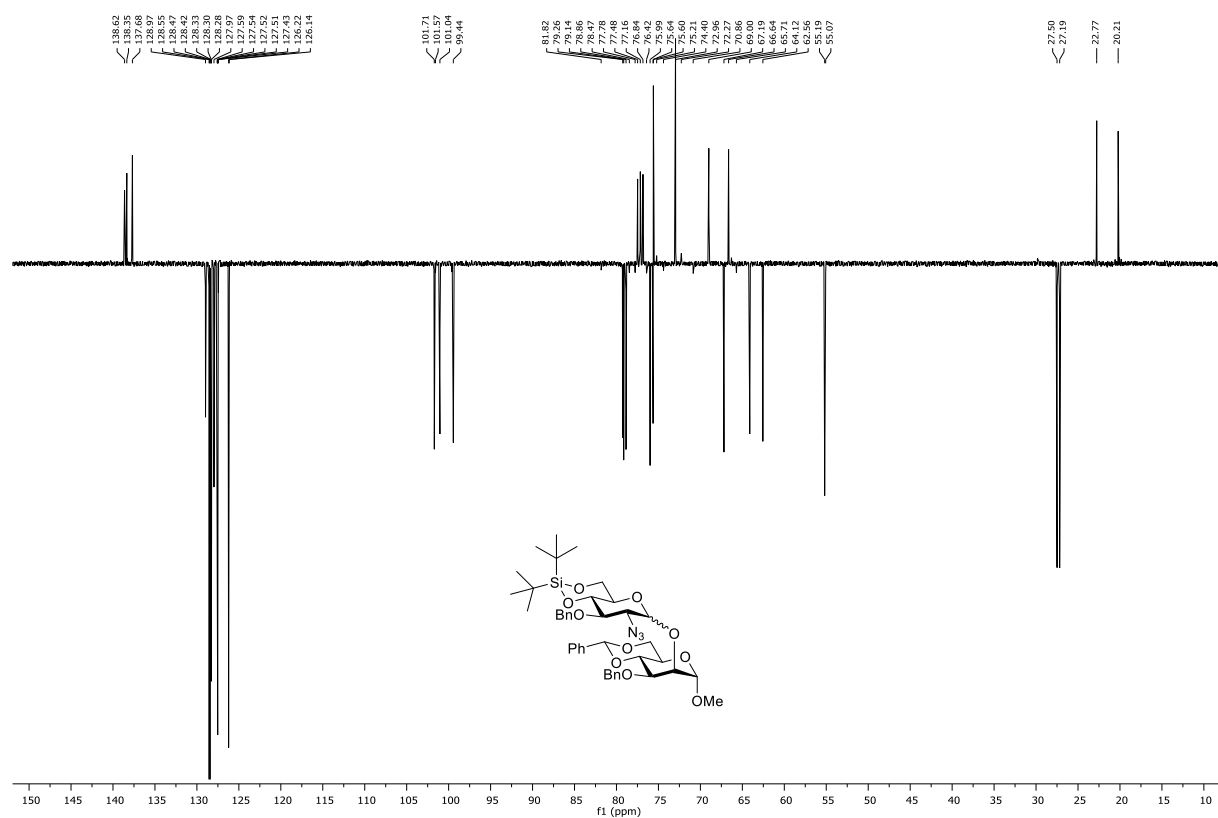

$^1\text{H}$ - $^1\text{H}$  COSY NMR

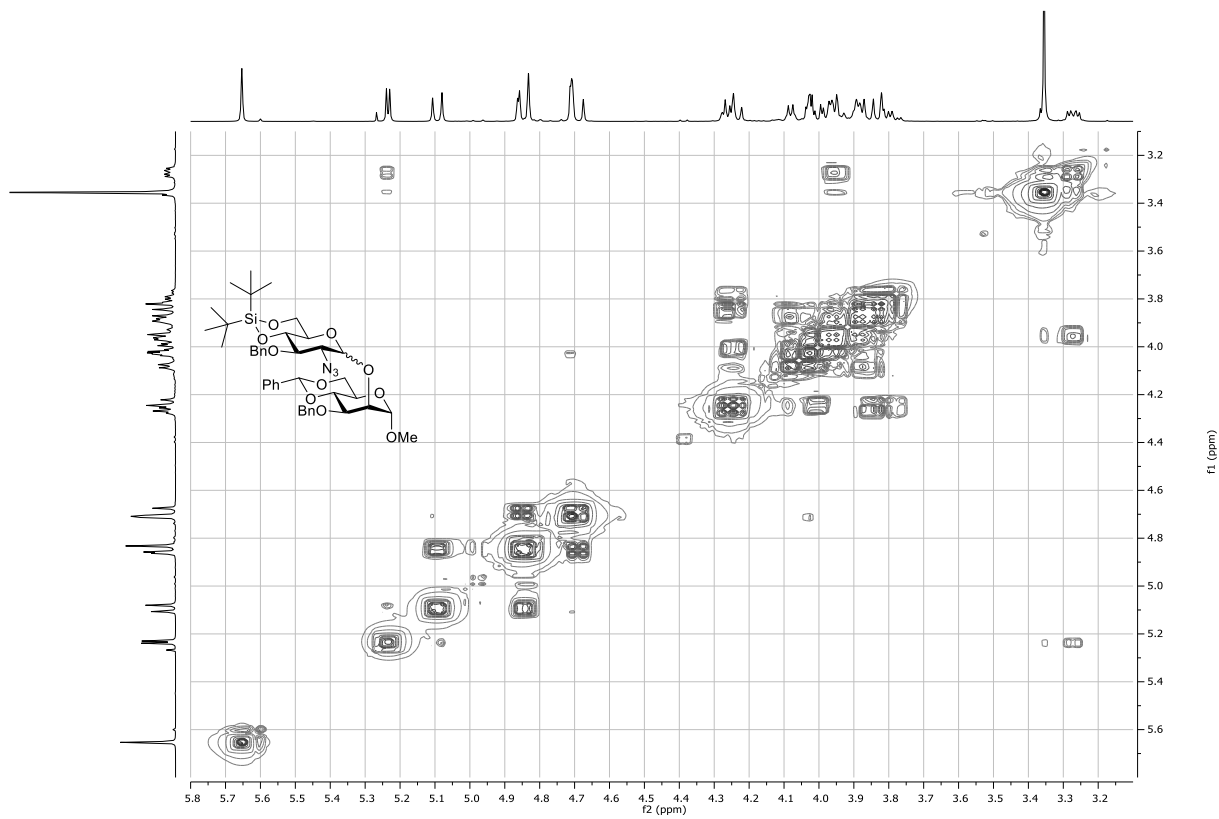

$^1\text{H}$ - $^{13}\text{C}$  HSQC NMR

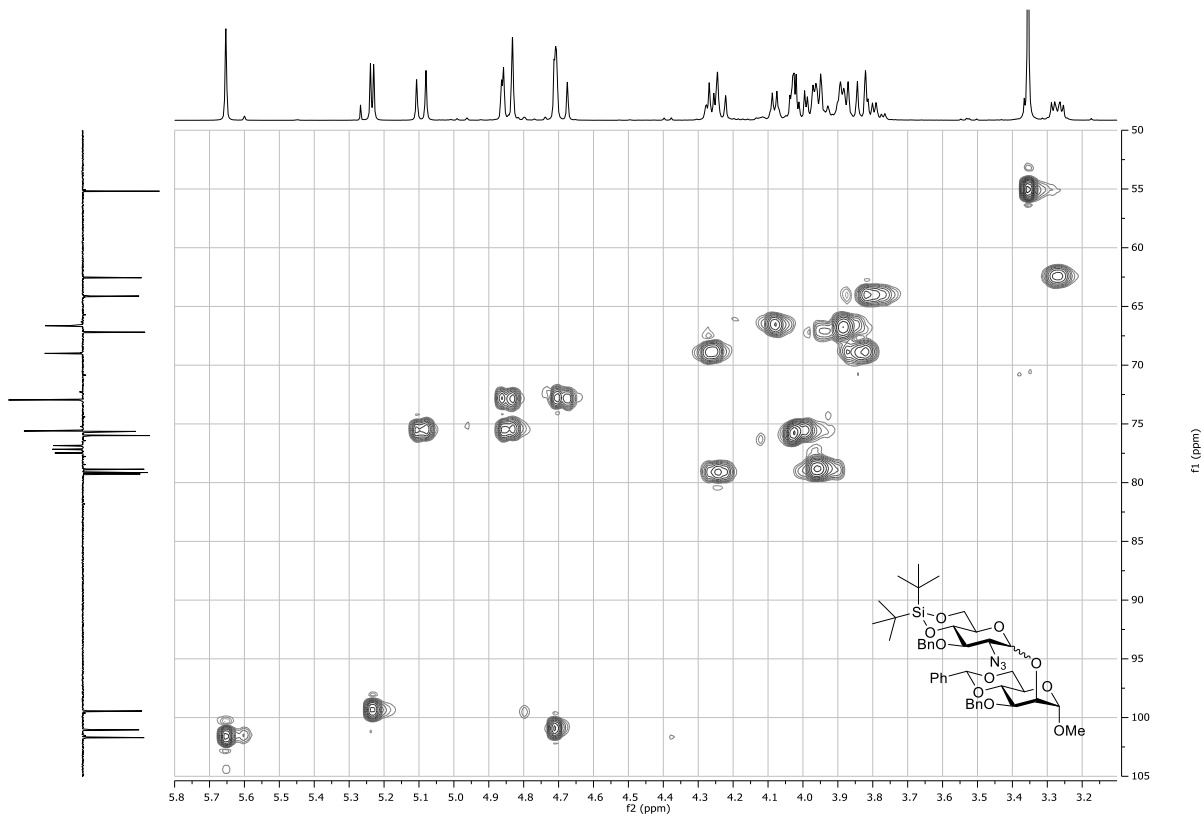

$^1\text{H}$ - $^{13}\text{C}$  HMBC NMR

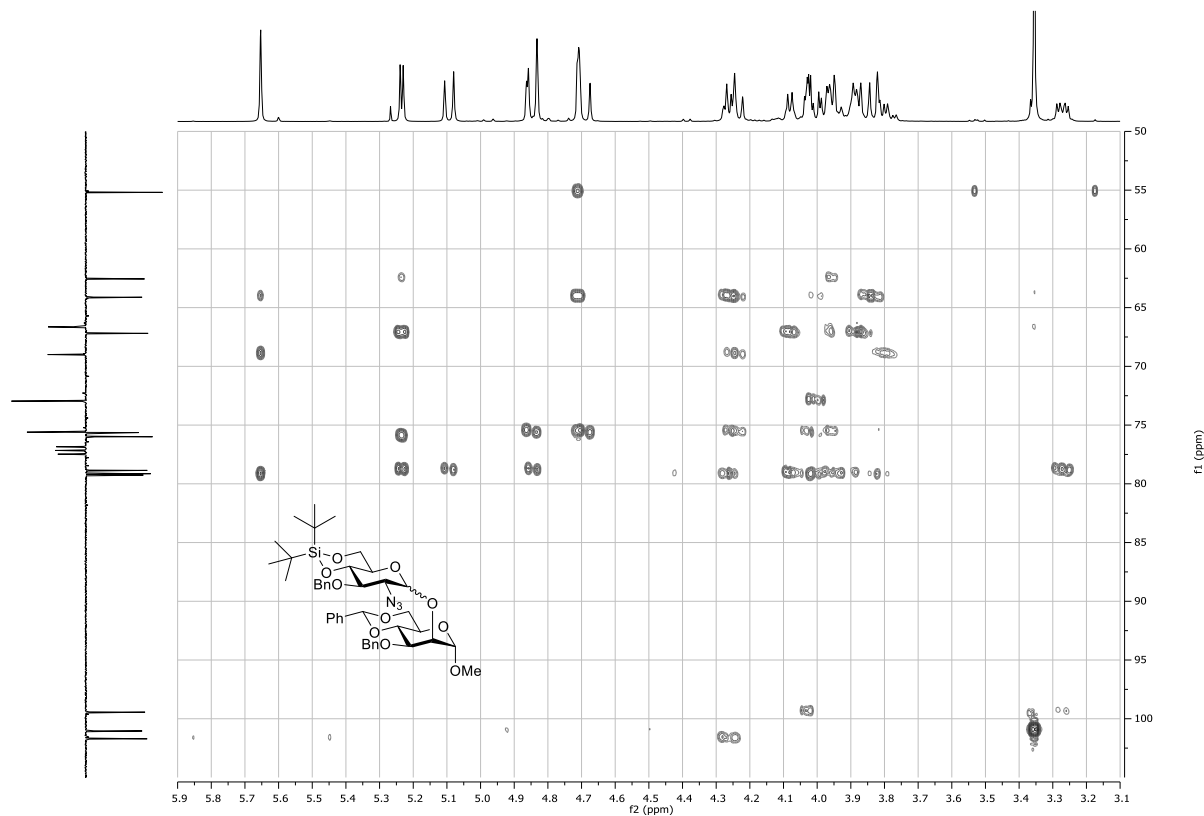

2,2,2-Trifluoroethyl 2-azido-3-*O*-benzyl-2-deoxy-4,6-*O*-di-*tert*-butylsilylidene- $\alpha$ -D-glucopyranoside (**2J**).

$^1\text{H}$  NMR, 400 MHz,  $\text{CDCl}_3$

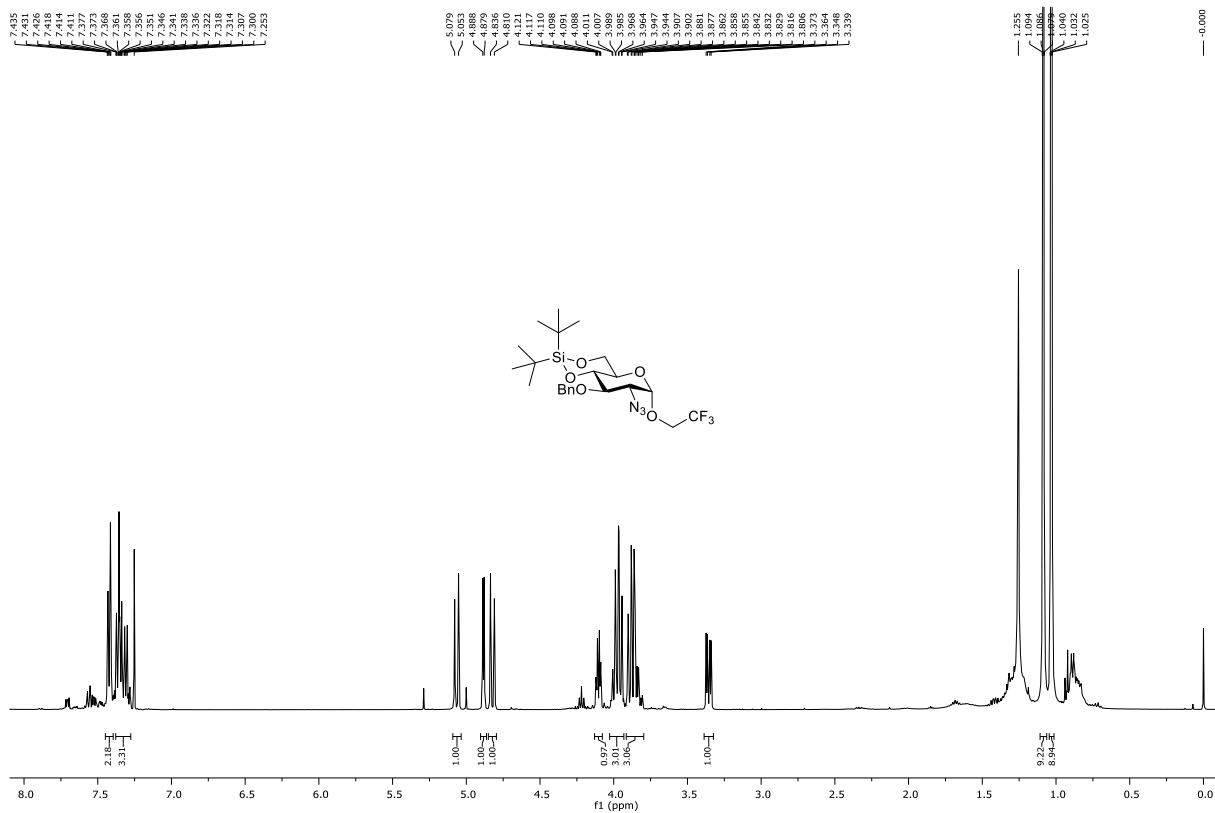



$^{13}\text{C}$ -APT NMR, 101 MHz,  $\text{CDCl}_3$

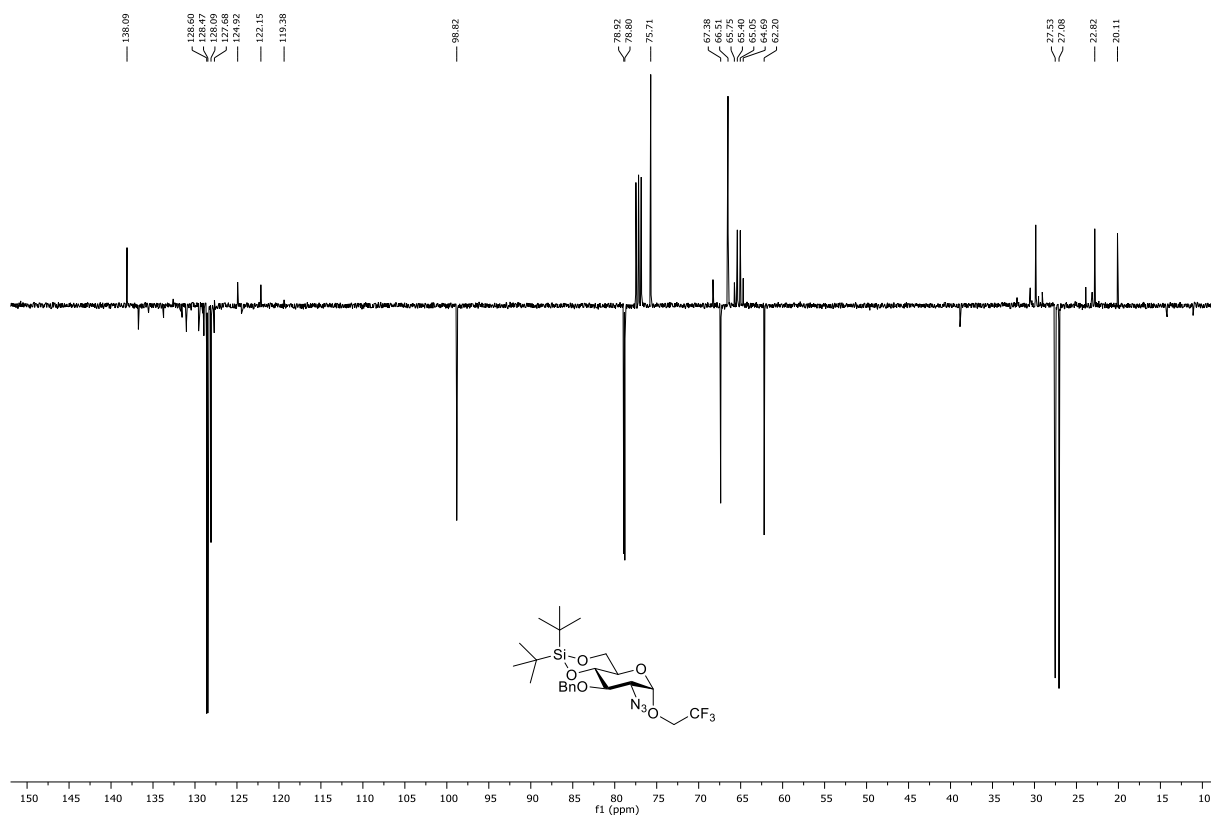

$^1\text{H}$ - $^1\text{H}$  COSY NMR

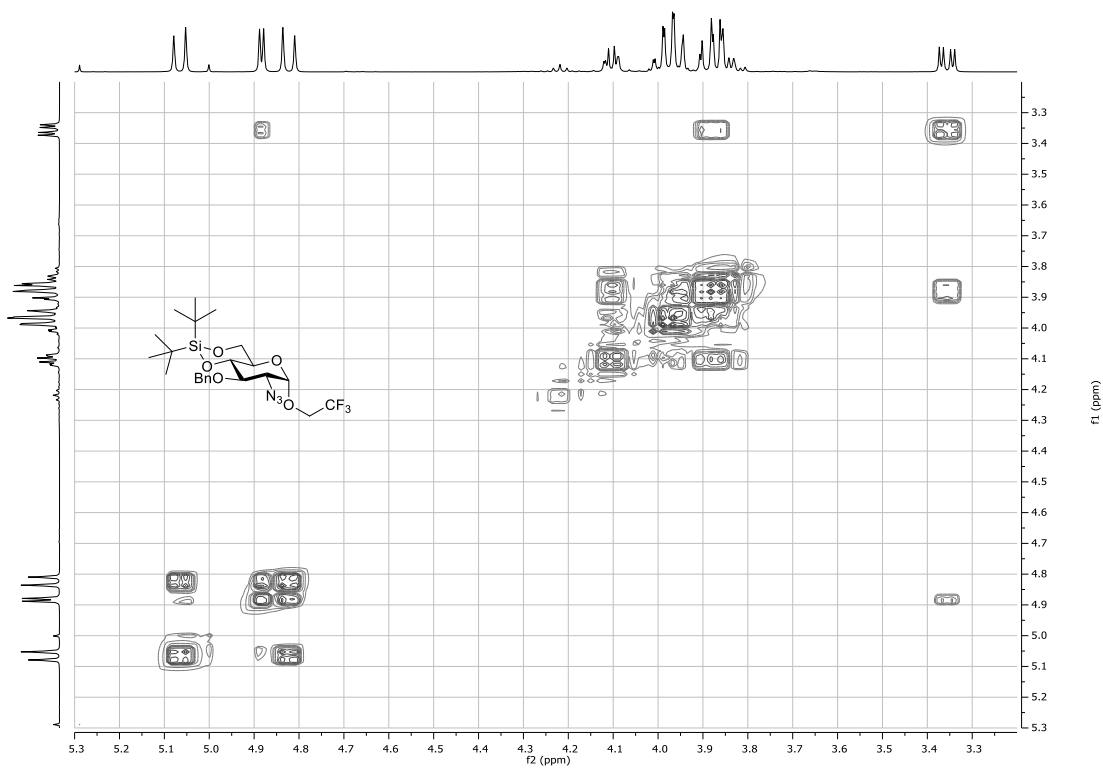

$^1\text{H}$ - $^{13}\text{C}$  HSQC NMR

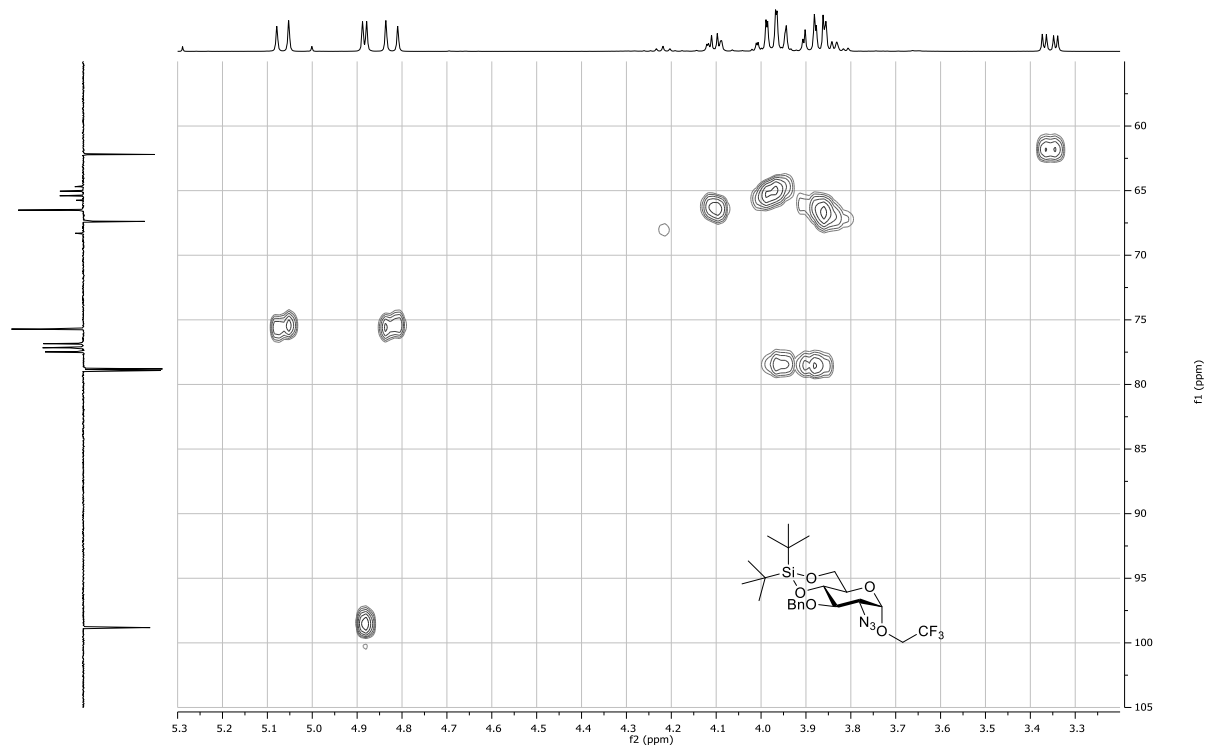

1,1,1,3,3,3-Hexafluoro-2-propyl 2-azido-3-*O*-benzyl-2-deoxy-4,6-*O*-di-*tert*-butylsilylidene- $\alpha$ -D-glucopyranoside (**2K**).

$^1\text{H}$  NMR, 400 MHz,  $\text{CDCl}_3$

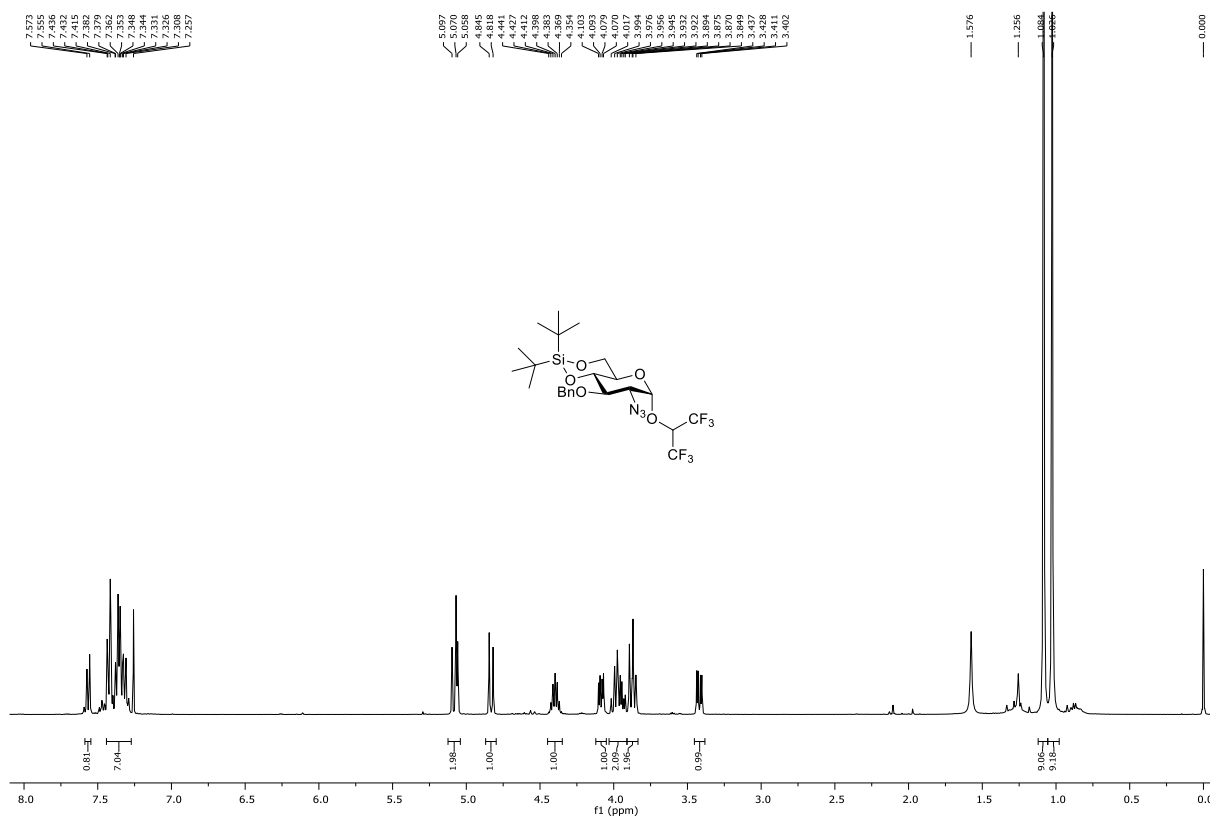

$^{13}\text{C}$ -APT NMR, 101 MHz,  $\text{CDCl}_3$

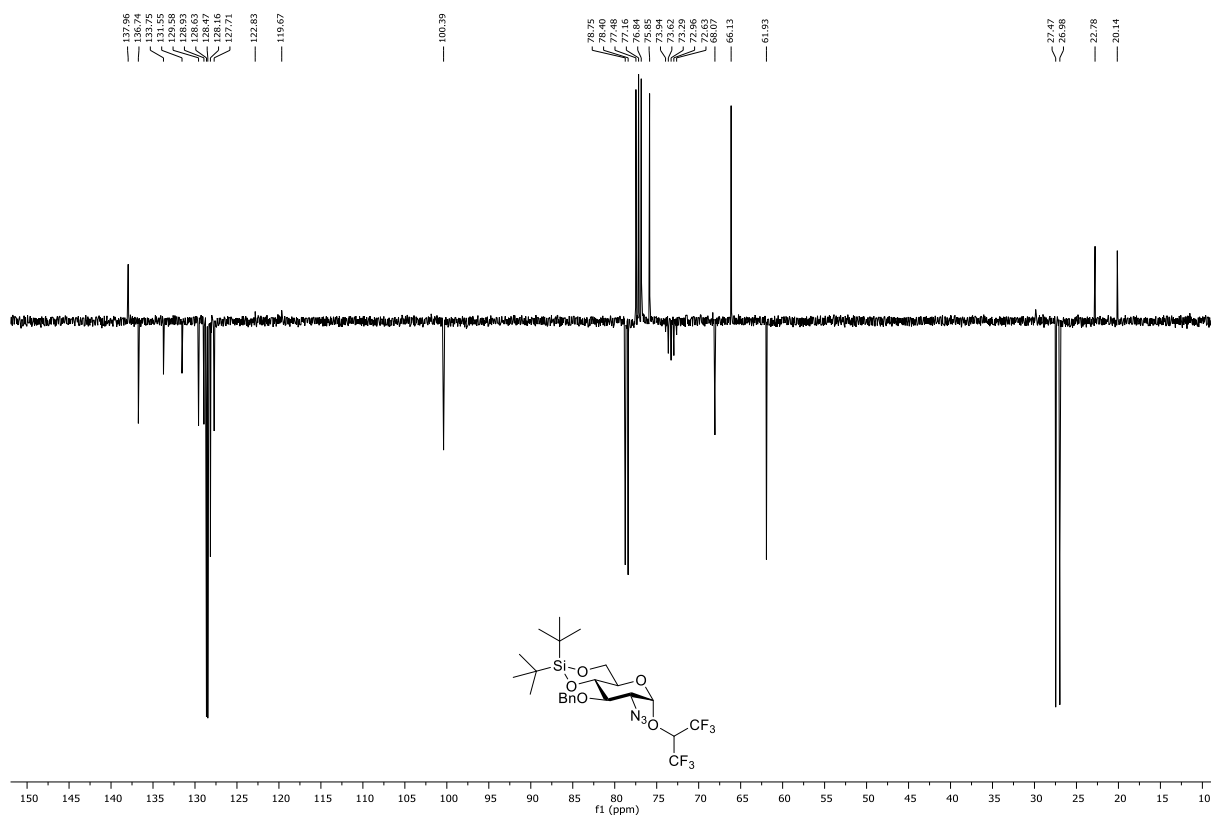

$^1\text{H}$ - $^1\text{H}$  COSY NMR

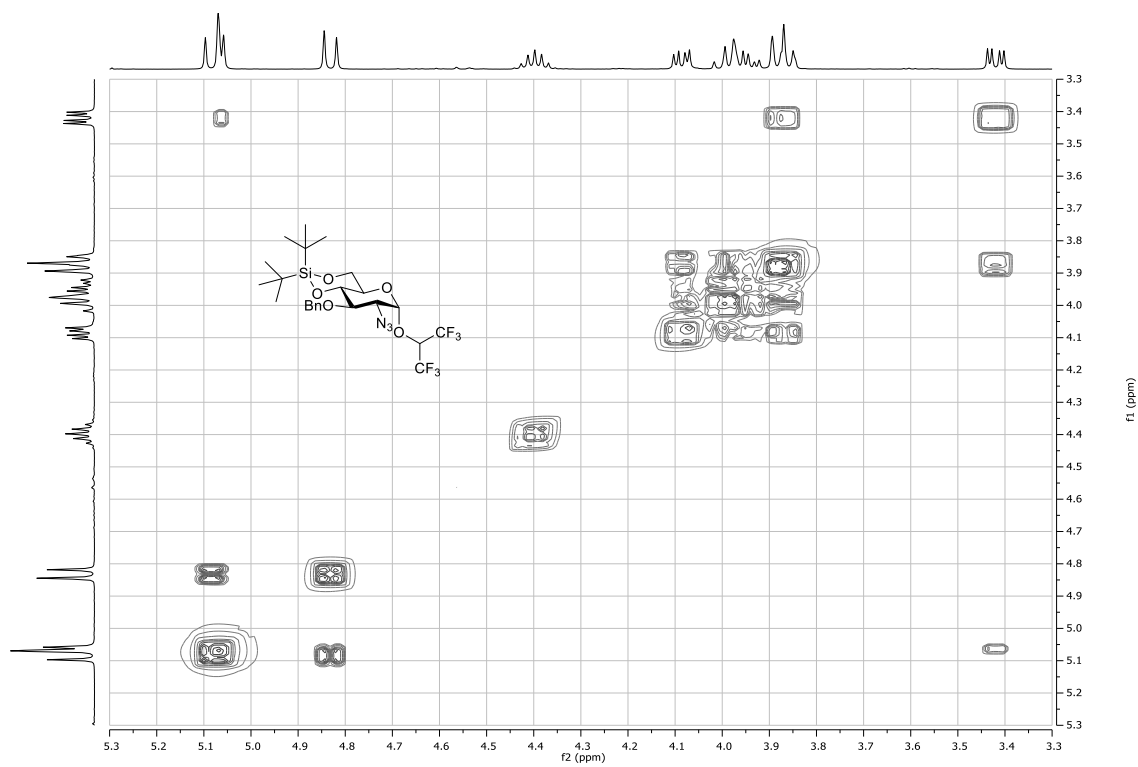

$^1\text{H}$ - $^{13}\text{C}$  HSQC NMR

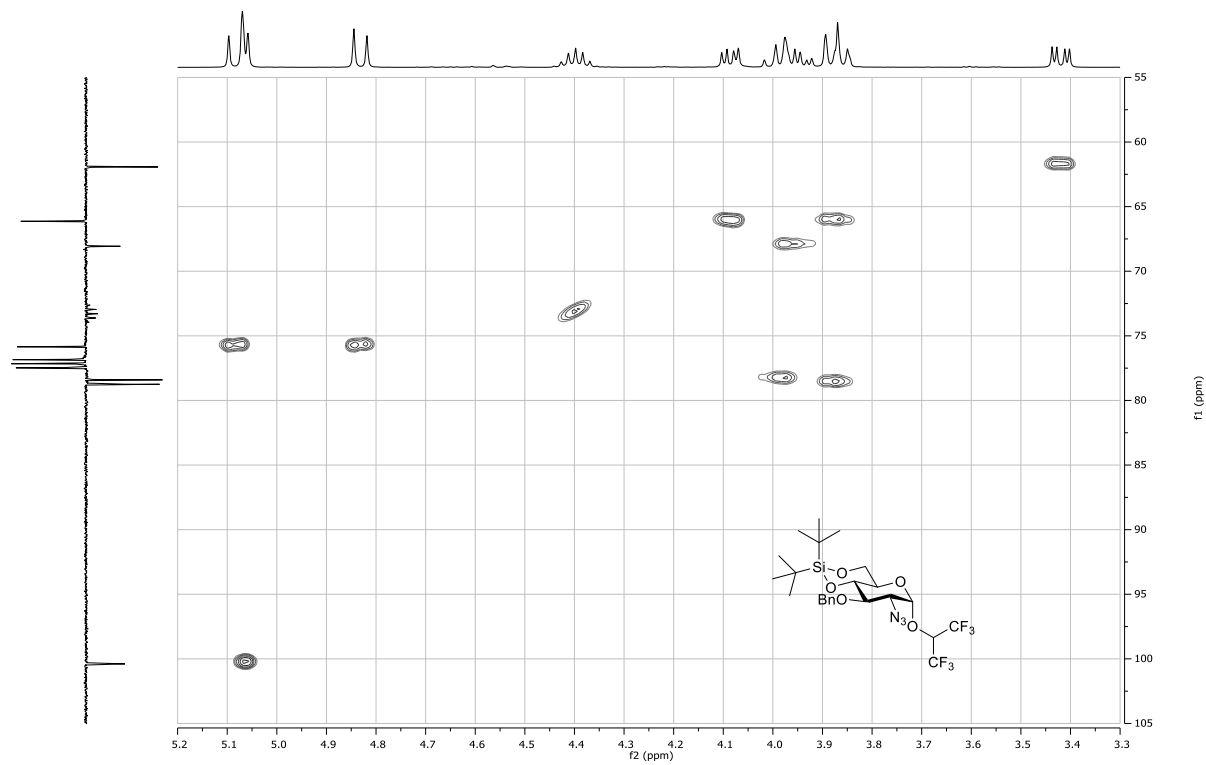

$^1\text{H}$ - $^{13}\text{C}$  HMBC NMR

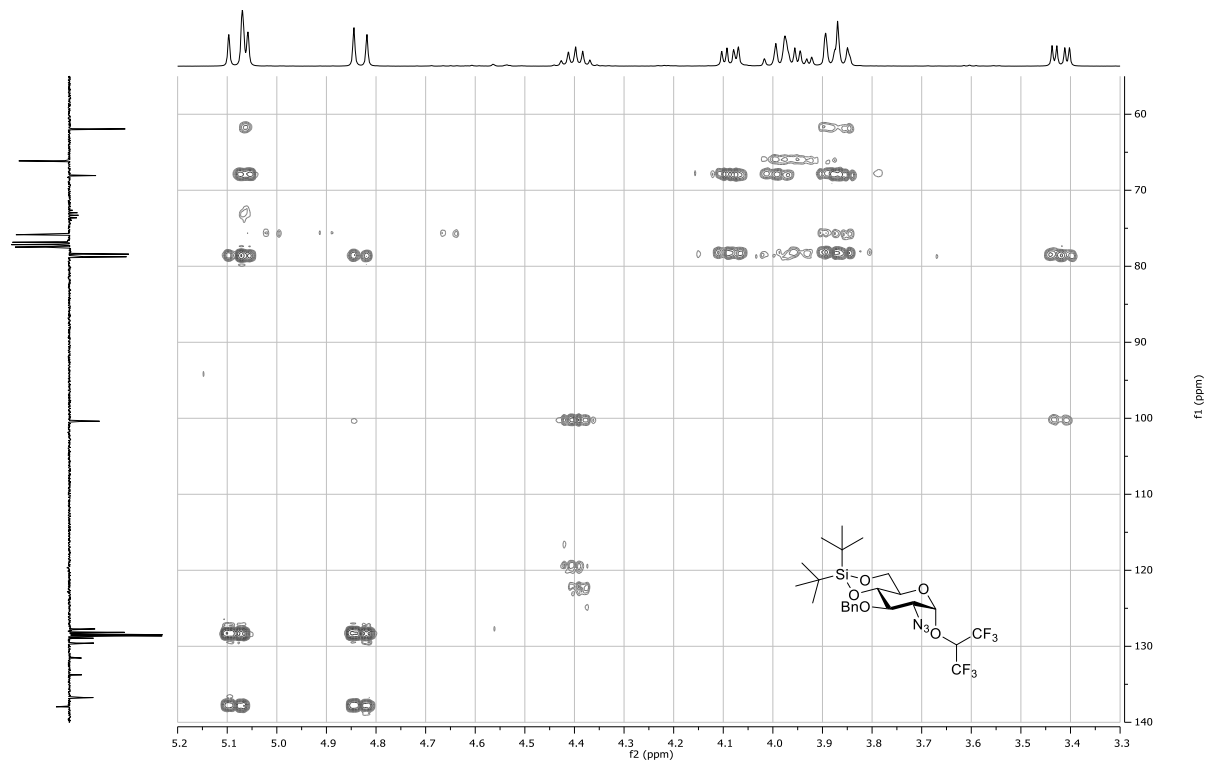

$^1\text{H}$ - $^1\text{H}$  NOESY NMR

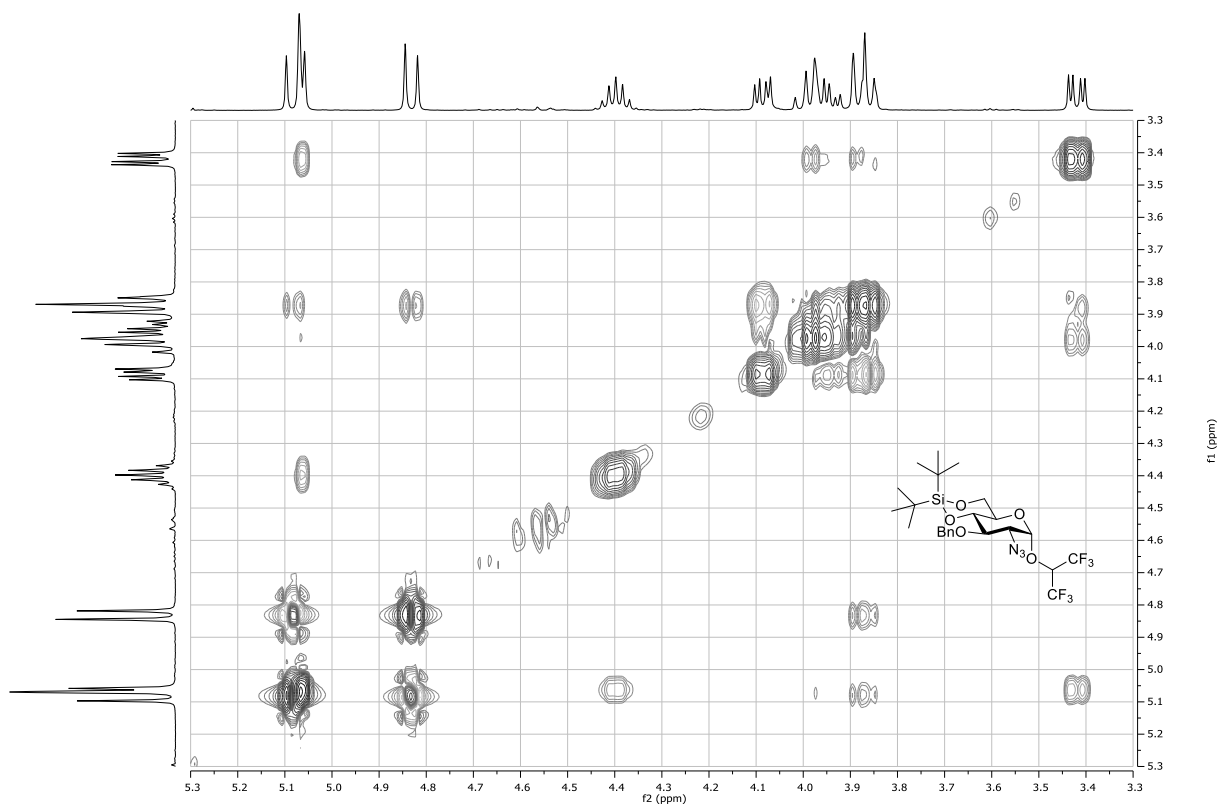

Ethyl 2-azido-3-O-benzyl-4,6-O-benzylidene-2-deoxy- $\beta$ -D-glucopyranoside (3A).

$^1\text{H}$  NMR, 400 MHz,  $\text{CDCl}_3$

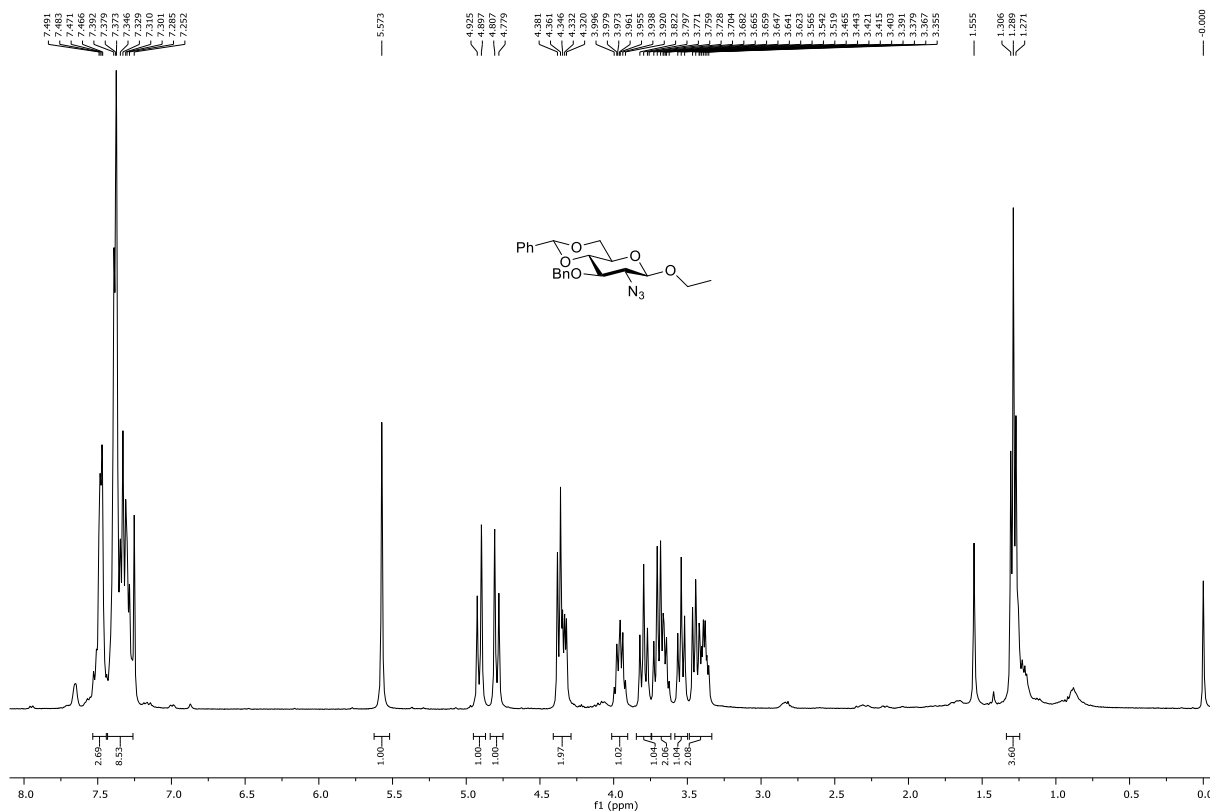

$^{13}\text{C}$ -APT NMR, 101 MHz,  $\text{CDCl}_3$

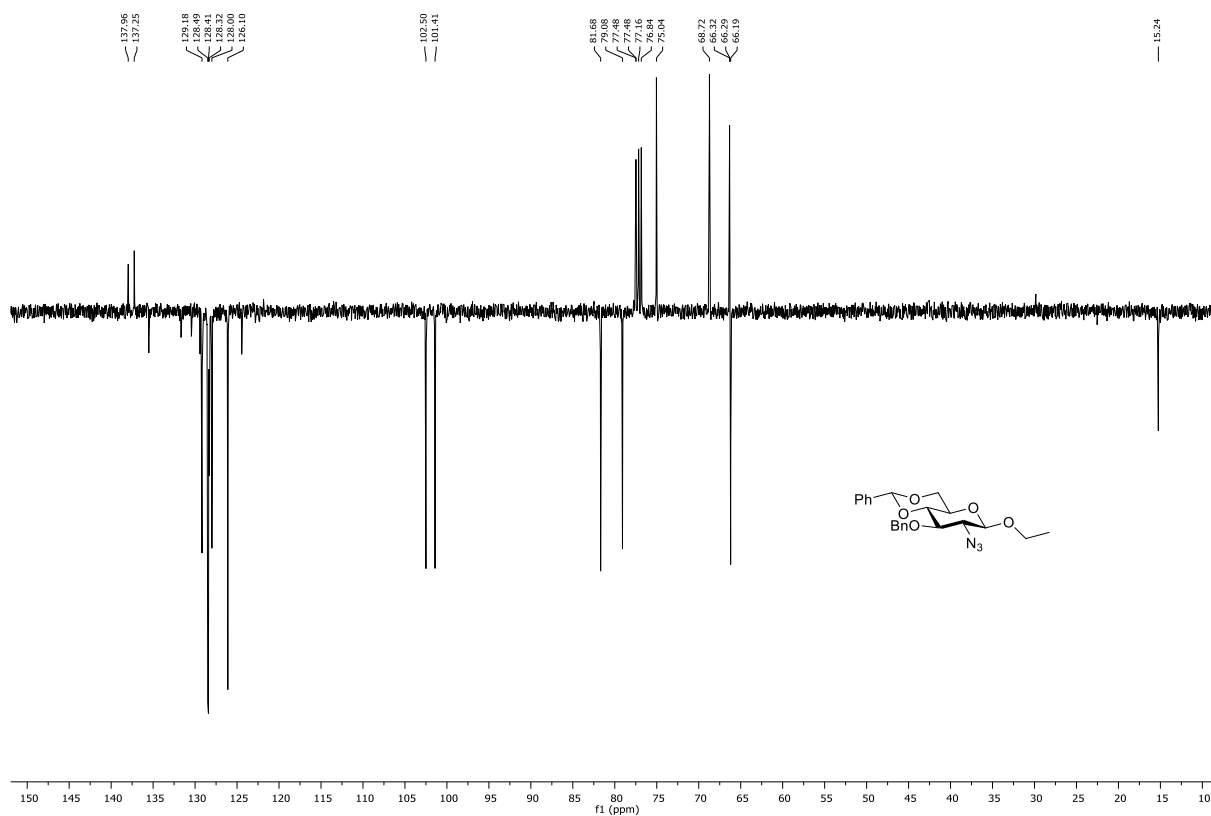

$^1\text{H}$ - $^1\text{H}$  COSY NMR,  $\text{CDCl}_3$

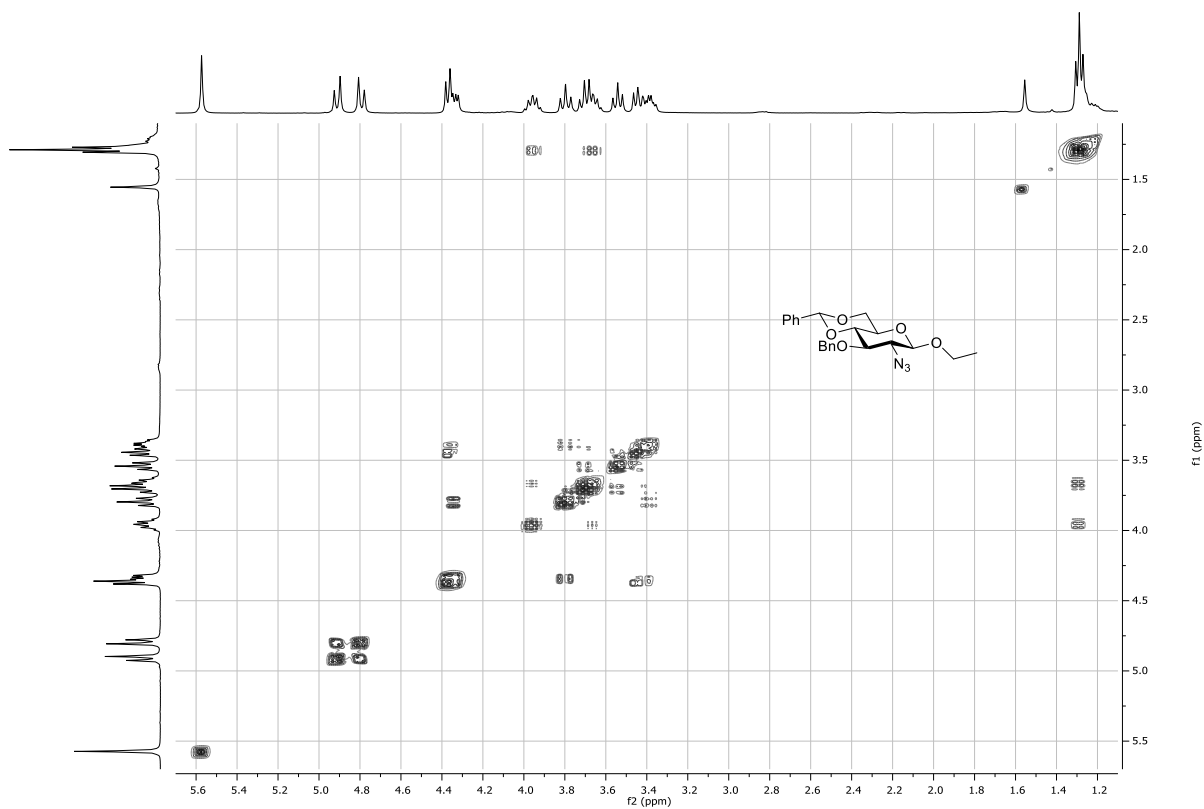

$^1\text{H}$ - $^{13}\text{C}$  HSQC NMR,  $\text{CDCl}_3$

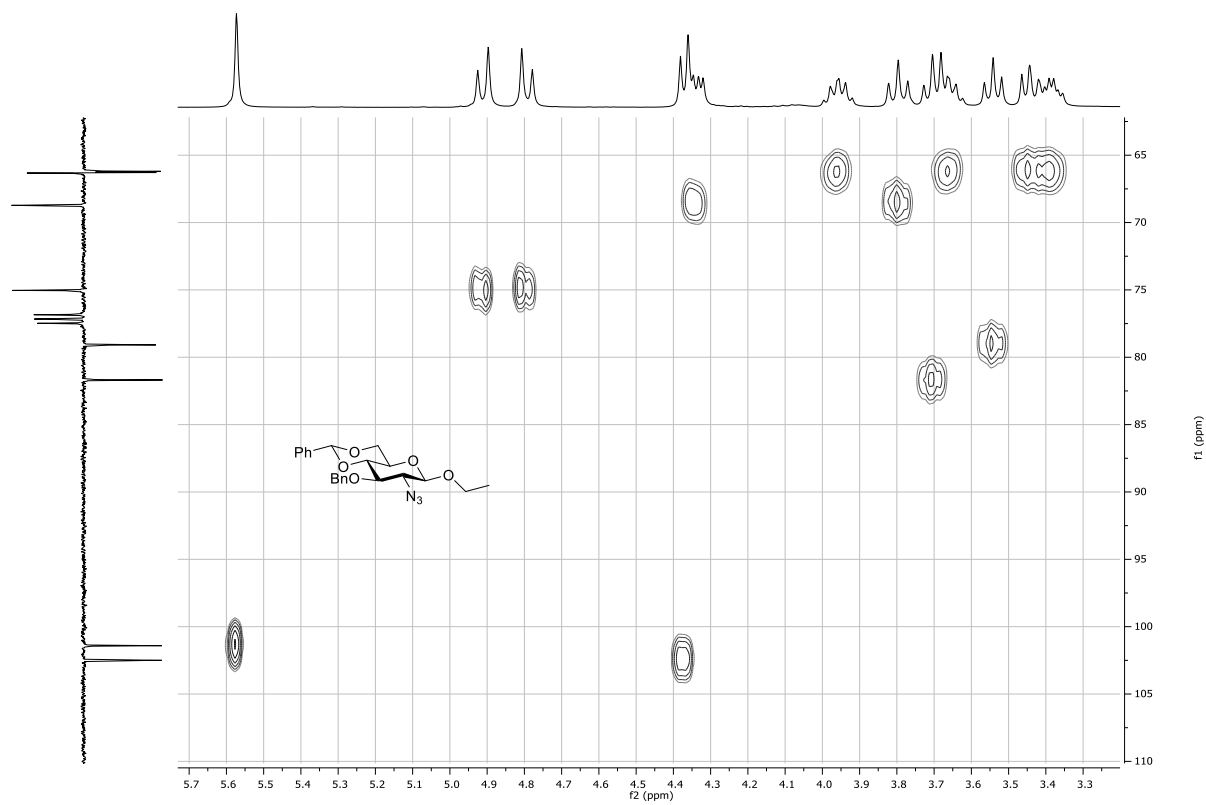

$^1\text{H}$ - $^{13}\text{C}$  HMBC-GATED NMR,  $\text{CDCl}_3$

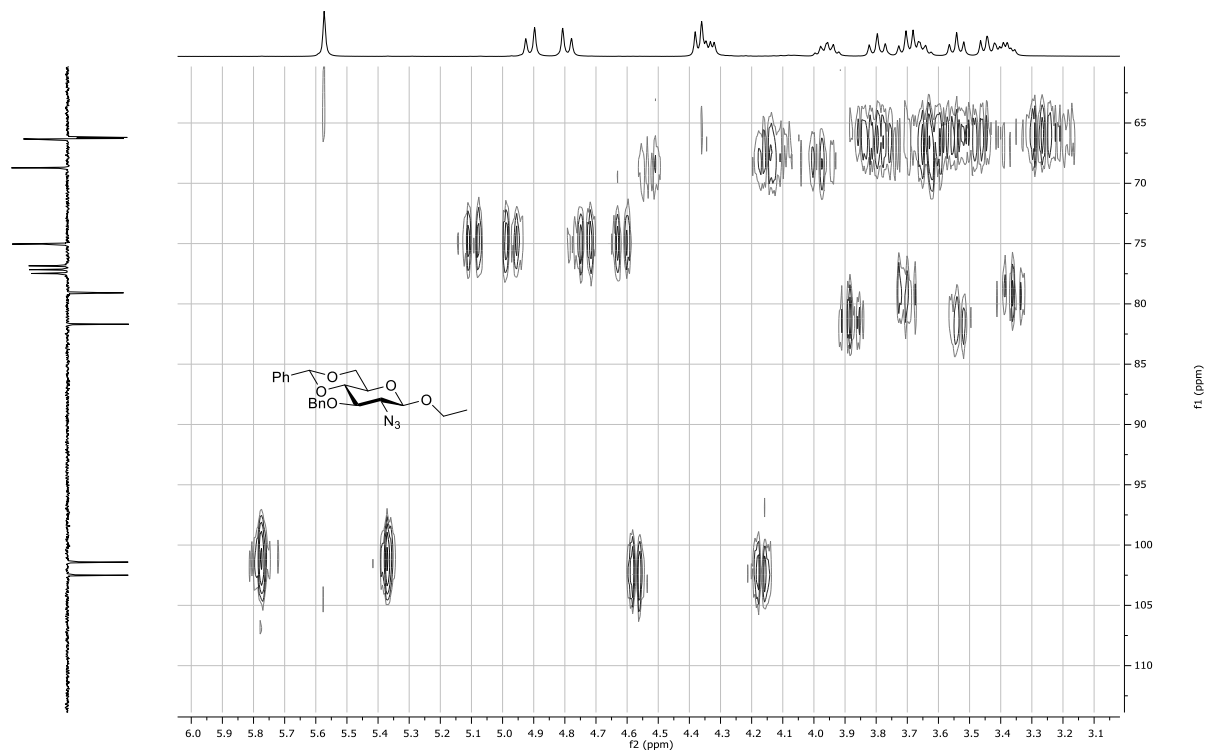

Cyclohexyl 2-azido-3-*O*-benzyl-4,6-*O*-benzylidene-2-deoxy- $\beta$ -D-glucopyranoside (**3B**).

$^1\text{H}$  NMR, 400 MHz,  $\text{CDCl}_3$

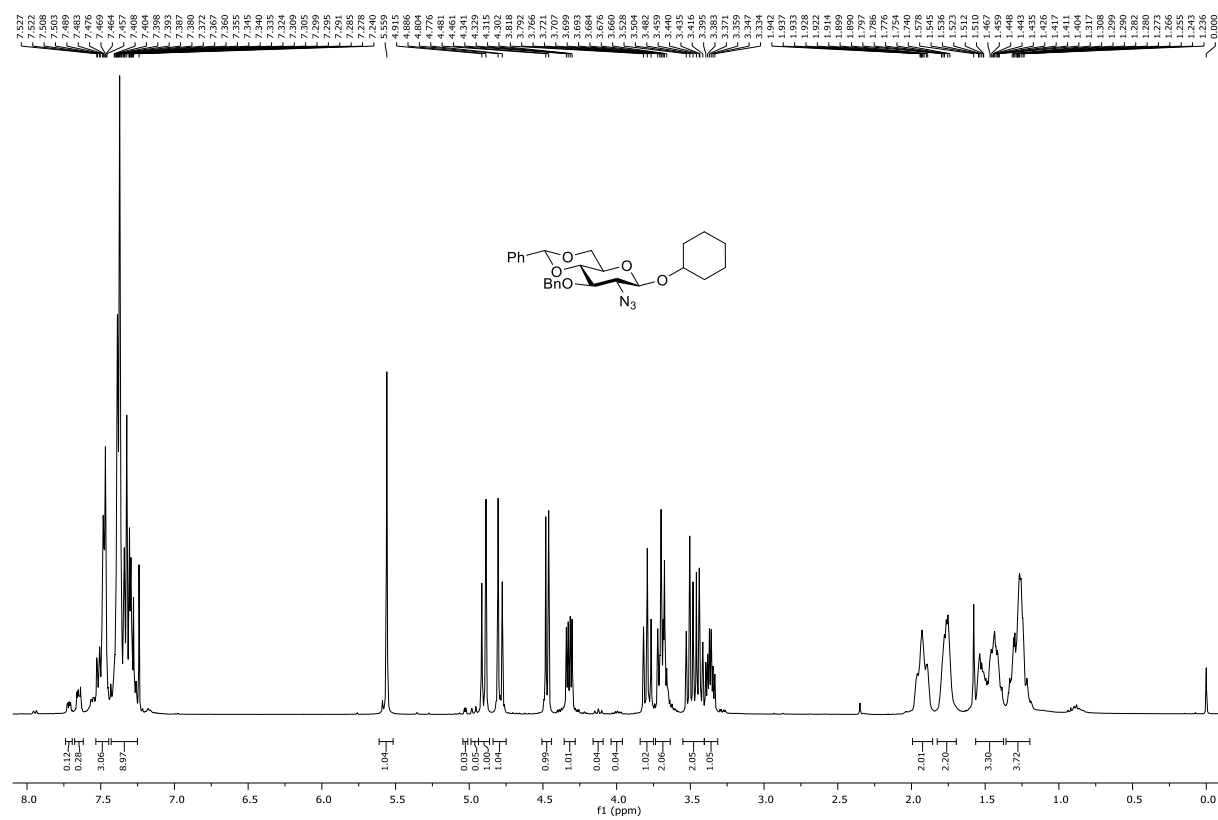

$^{13}\text{C}$ -APT NMR, 101 MHz,  $\text{CDCl}_3$

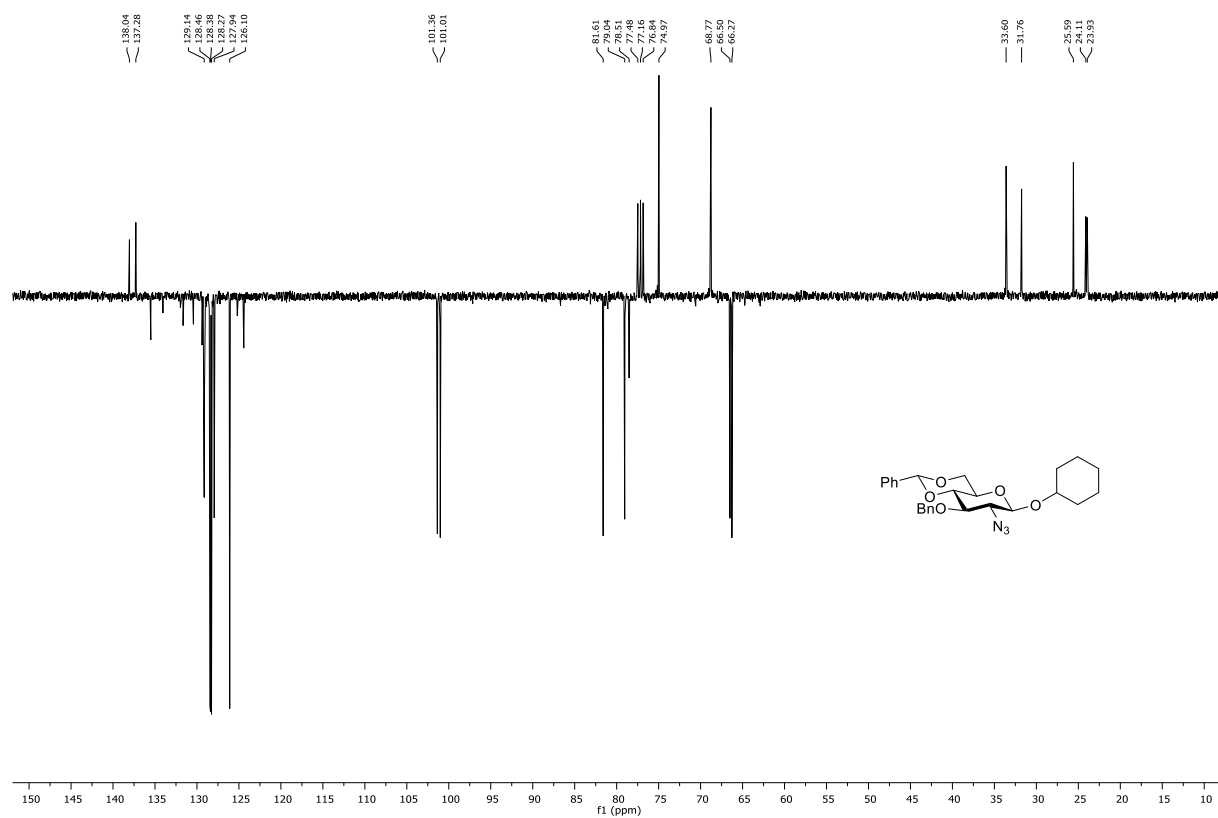



$^1\text{H}$ - $^1\text{H}$  COSY NMR,  $\text{CDCl}_3$

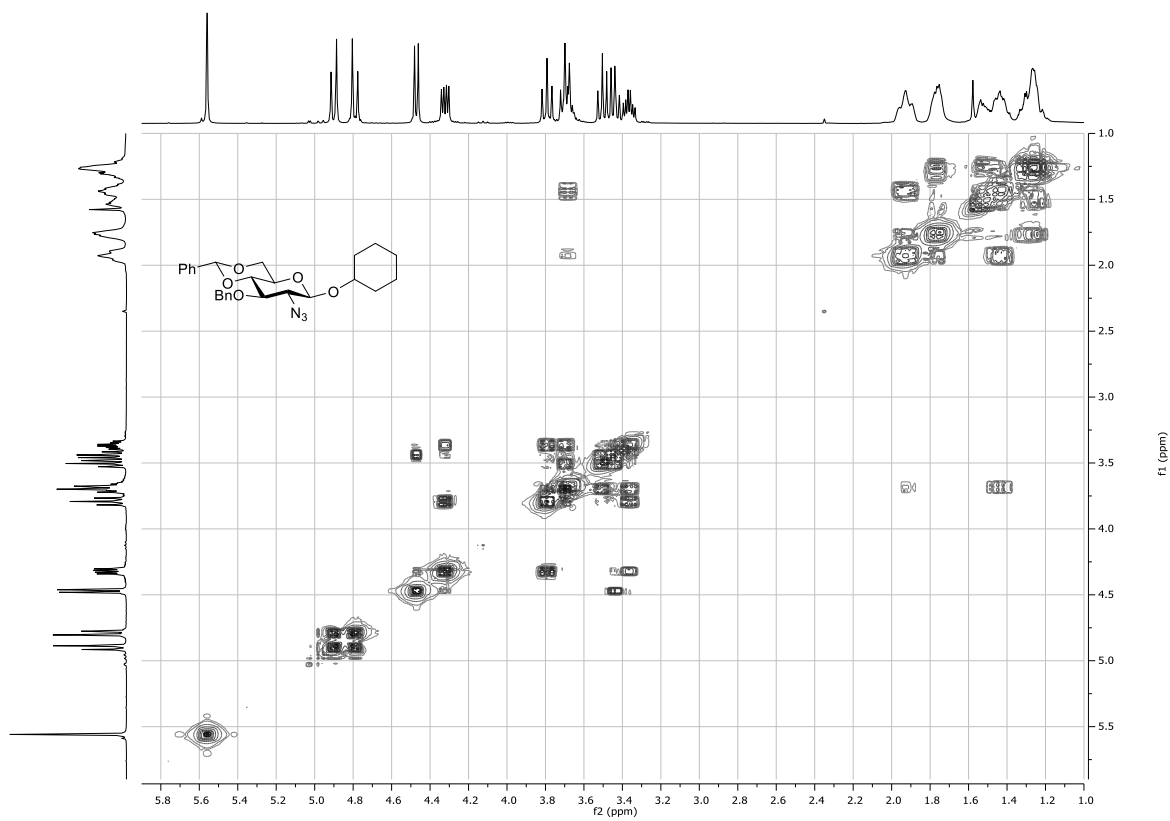

$^1\text{H}$ - $^{13}\text{C}$  HSQC NMR,  $\text{CDCl}_3$

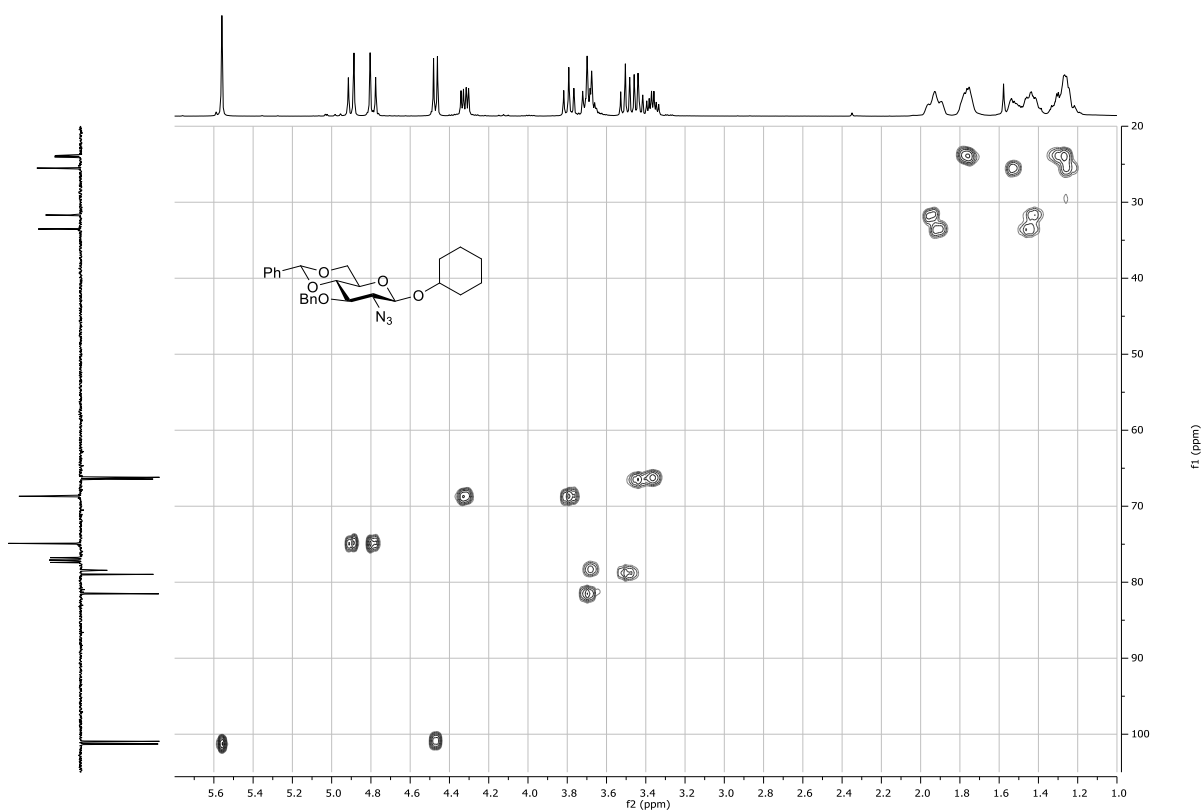

Methyl 6-*O*-(2-azido-3-*O*-benzyl-4,6-*O*-benzylidene-2-deoxy- $\beta$ -D-glucopyranosyl)-2,3,4-tri-*O*-benzyl- $\alpha$ -D-glucopyranoside (**3C**).

$^1\text{H}$  NMR, 400 MHz,  $\text{CDCl}_3$

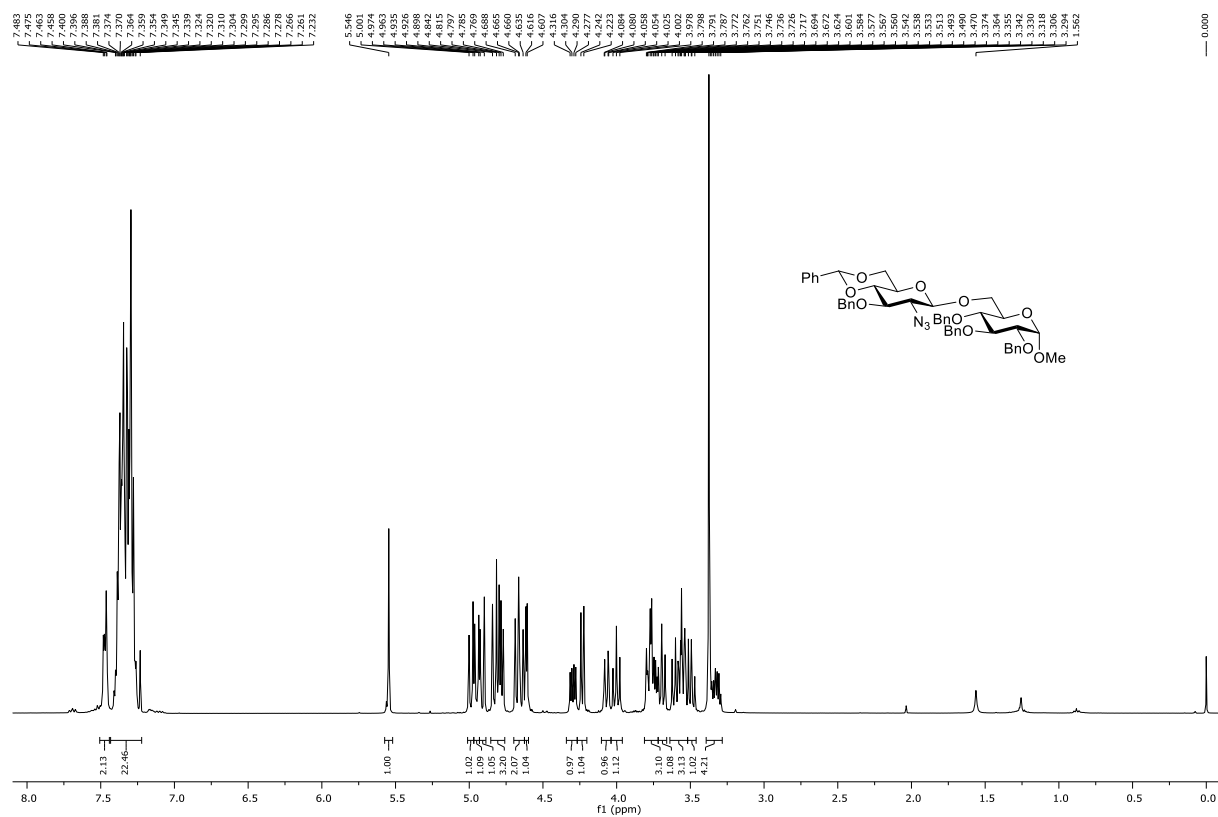

$^{13}\text{C}$ -APT NMR, 101 MHz,  $\text{CDCl}_3$

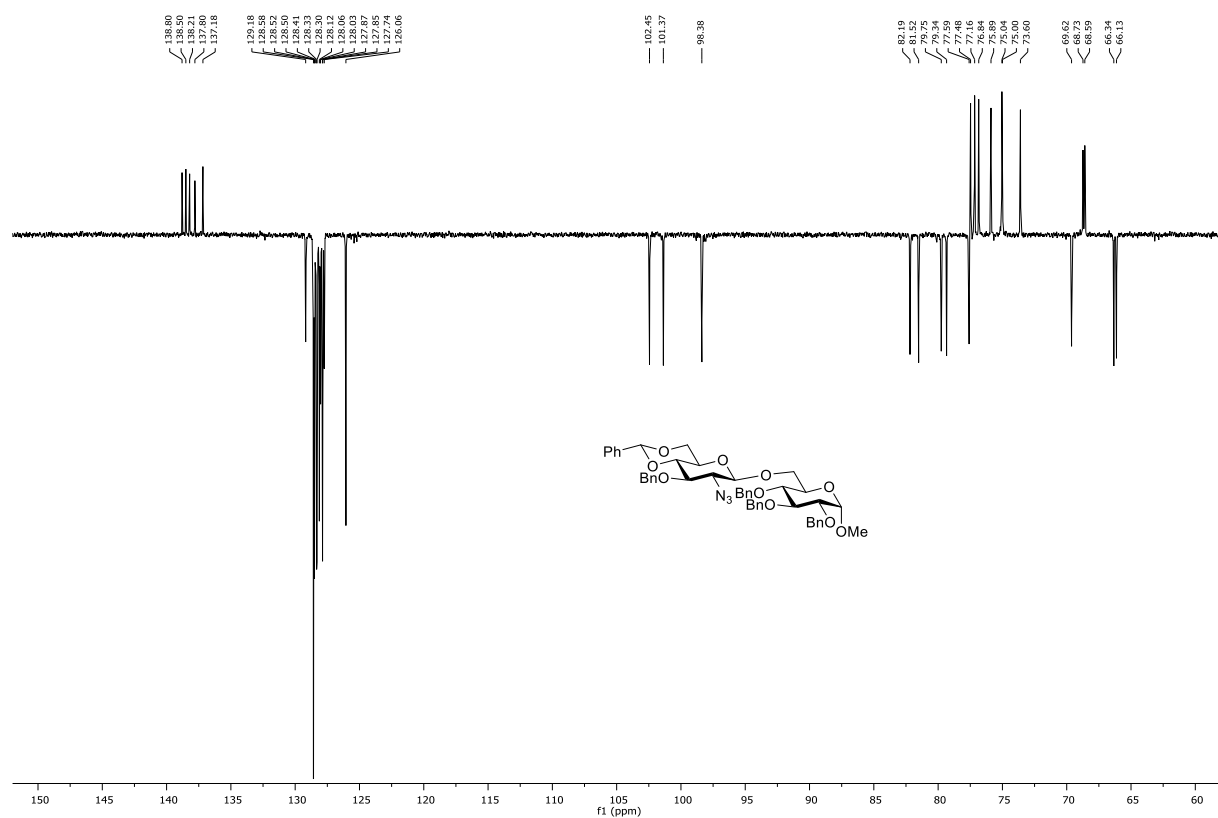

$^1\text{H}$ - $^1\text{H}$  COSY NMR,  $\text{CDCl}_3$

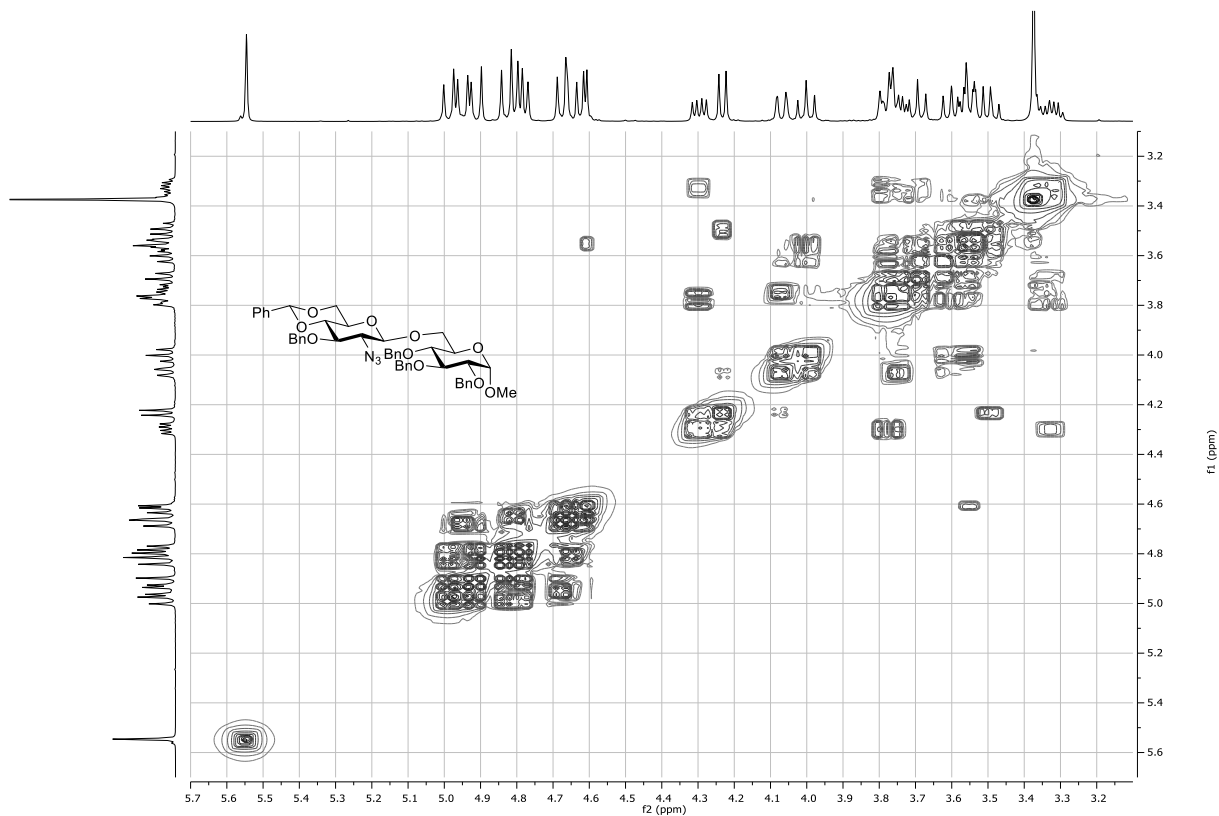

$^1\text{H}$ - $^{13}\text{C}$  HSQC NMR,  $\text{CDCl}_3$

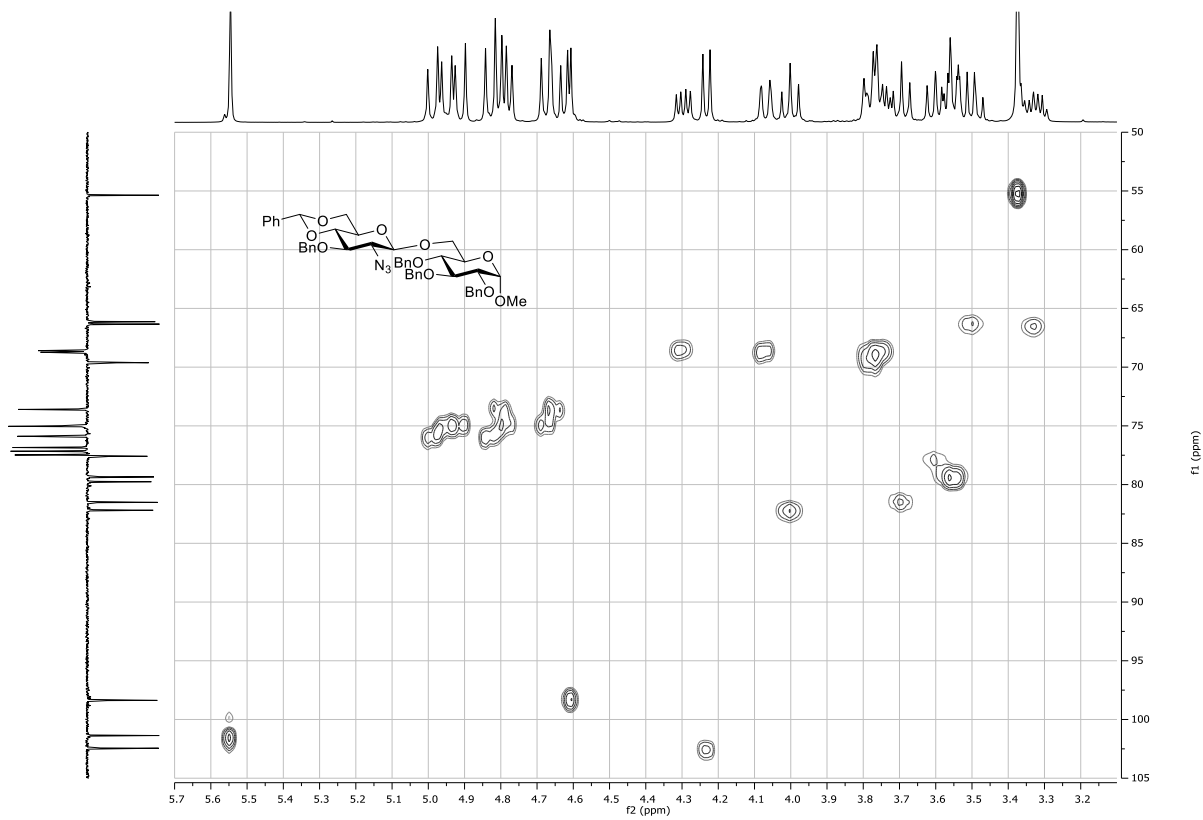

$^1\text{H}$ - $^{13}\text{C}$  HMBC NMR,  $\text{CDCl}_3$

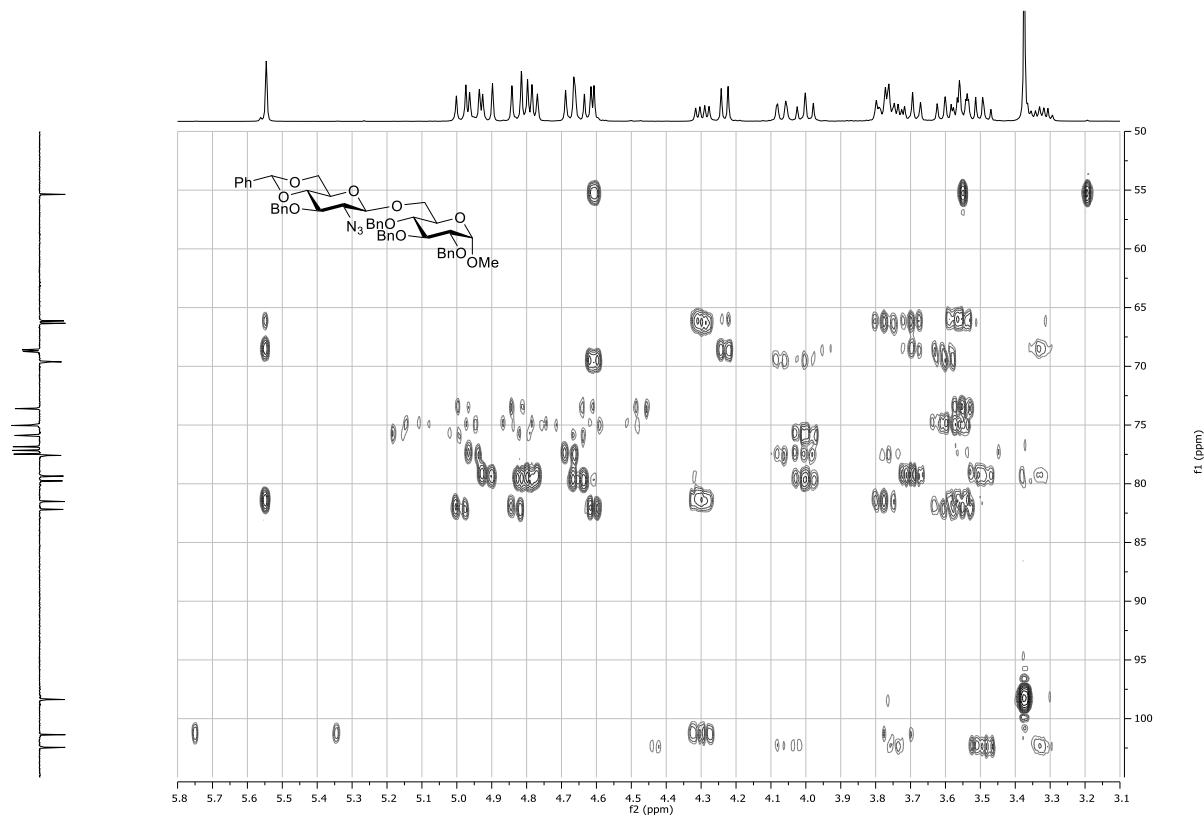

2-Fluoroethyl 2-azido-3-*O*-benzyl-4,6-*O*-benzylidene-2-deoxy- $\alpha/\beta$ -D-glucopyranoside (**3D**).

$^1\text{H}$  NMR, 400 MHz,  $\text{CDCl}_3$

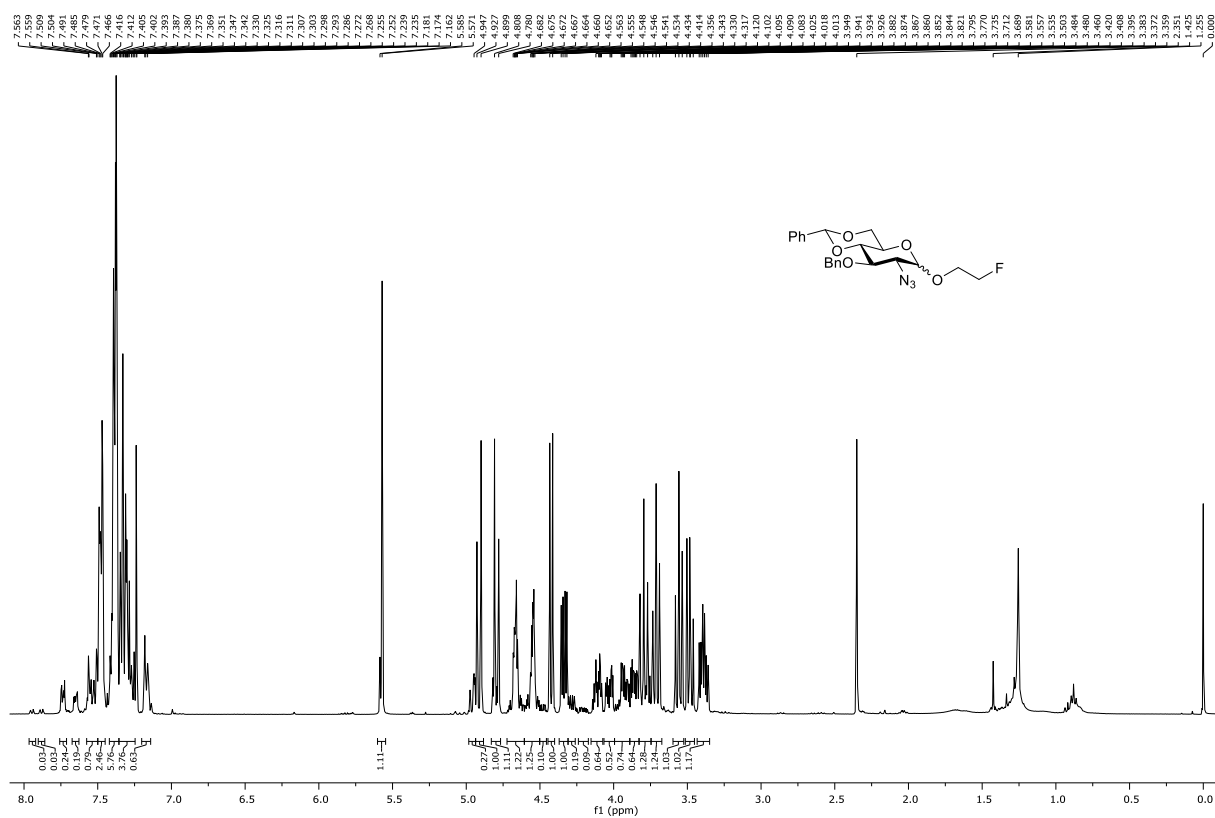

$^{13}\text{C}$ -APT NMR, 101 MHz,  $\text{CDCl}_3$

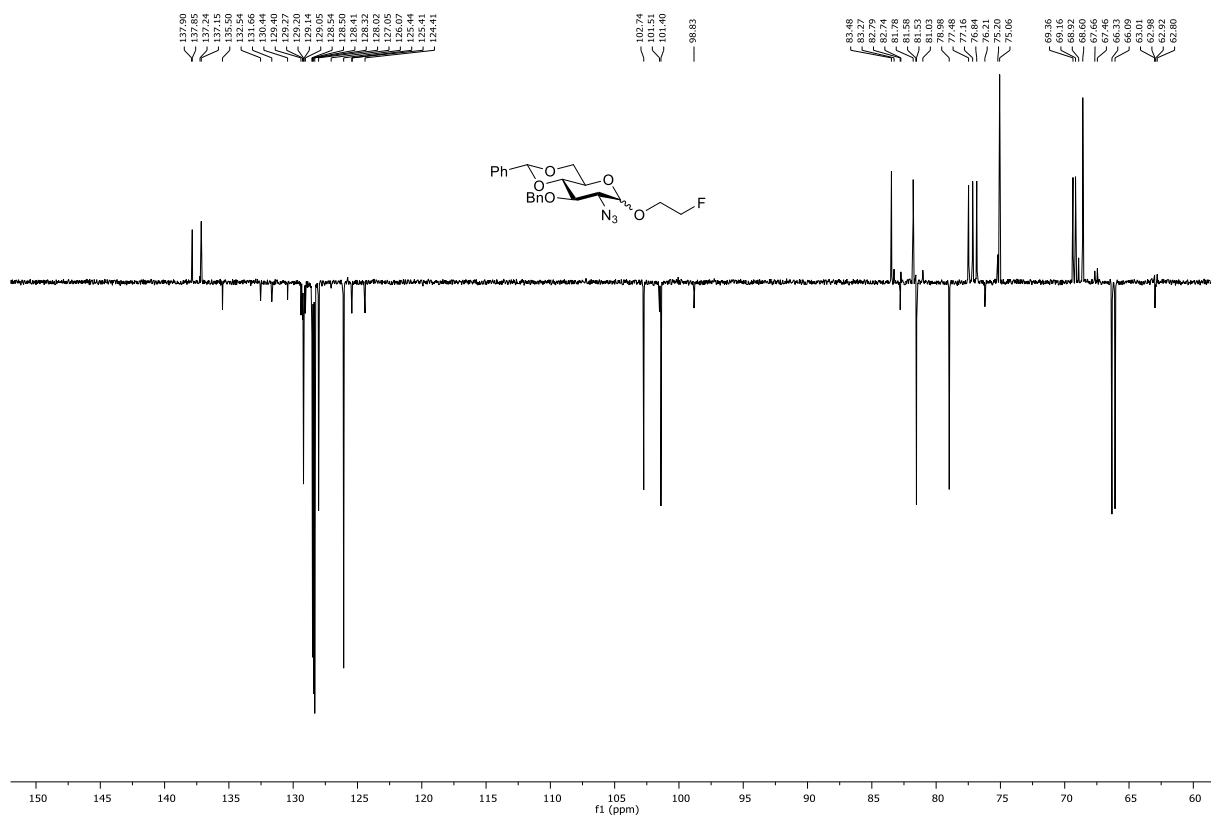

$^1\text{H}$ - $^1\text{H}$  COSY NMR,  $\text{CDCl}_3$

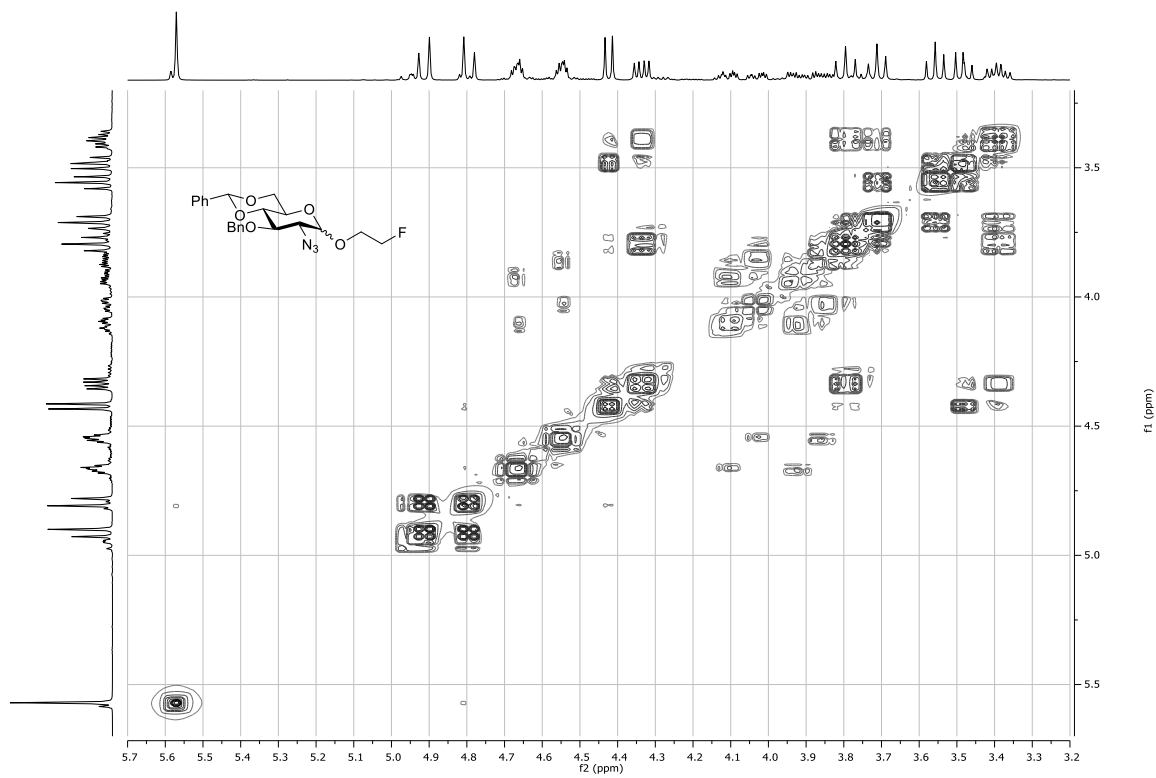

$^1\text{H}$ - $^{13}\text{C}$  HSQC NMR,  $\text{CDCl}_3$

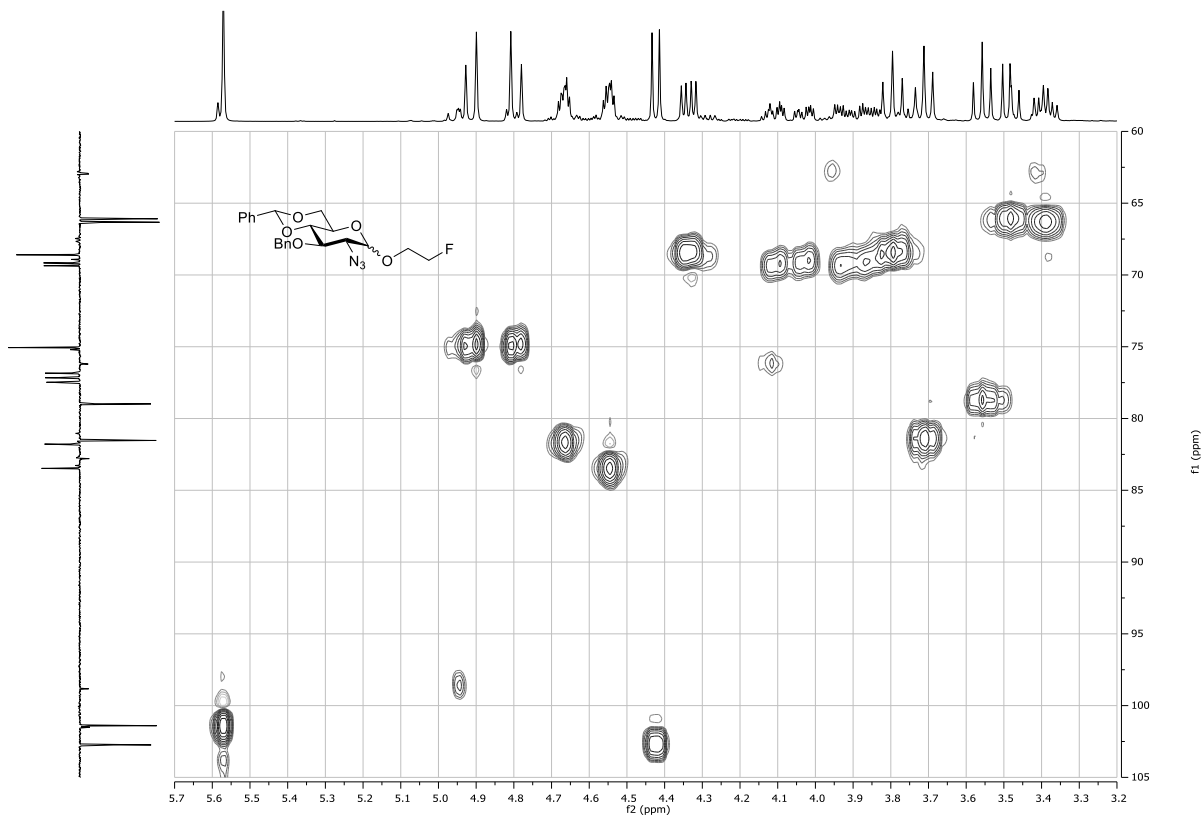

$^1\text{H}$ - $^{13}\text{C}$  HMBC-GATED NMR,  $\text{CDCl}_3$

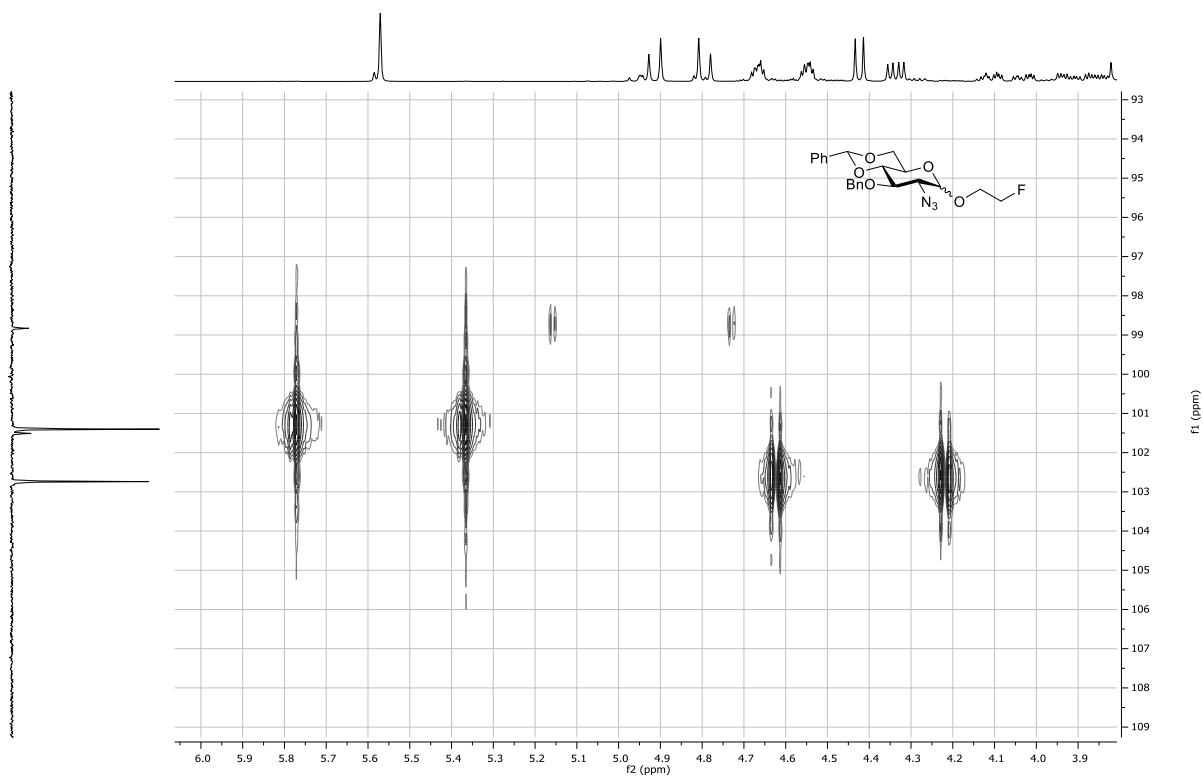

Methyl 4-*O*-(2-azido-3-*O*-benzyl-4,6-*O*-benzylidene-2-deoxy- $\alpha/\beta$ -D-glucopyranosyl)-2,3,6-tri-*O*-benzyl- $\alpha$ -D-glucopyranoside (**3E**).

$^1\text{H}$  NMR, 400 MHz,  $\text{CDCl}_3$

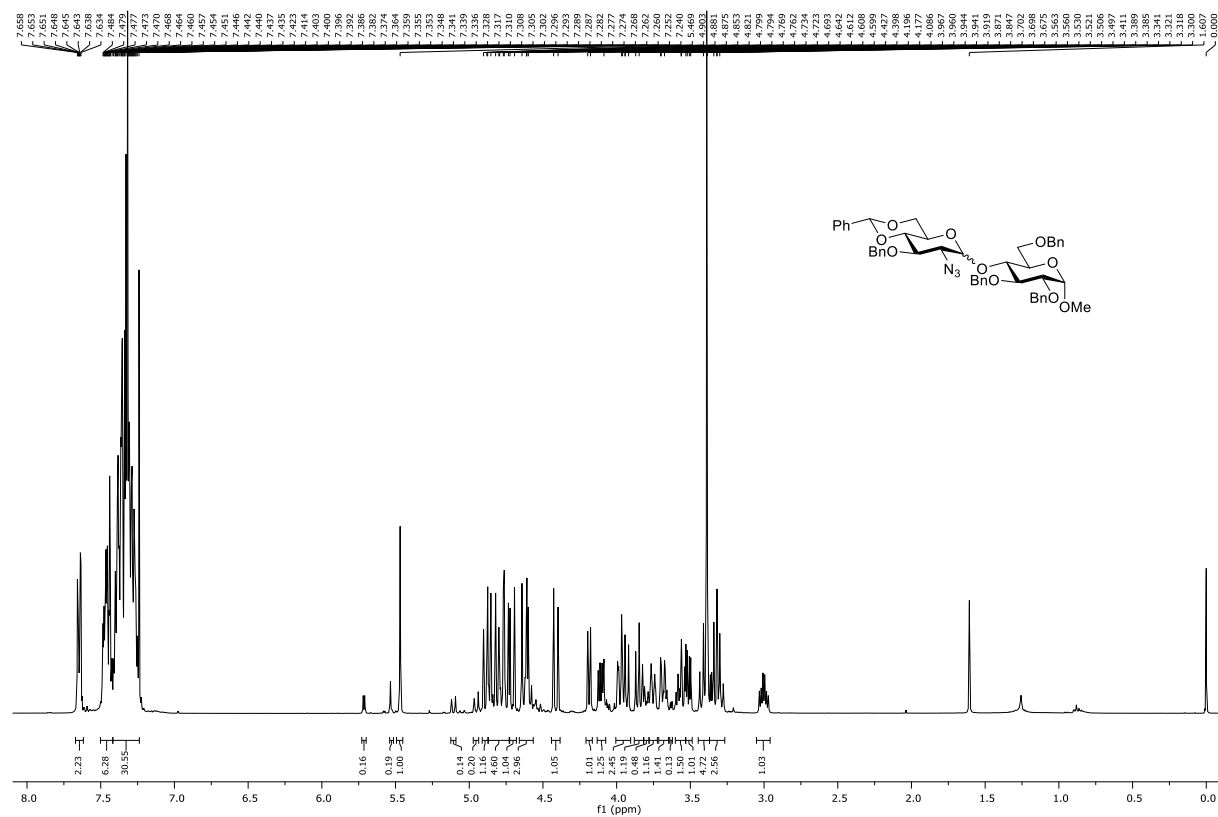

$^{13}\text{C}$ -APT NMR, 101 MHz,  $\text{CDCl}_3$

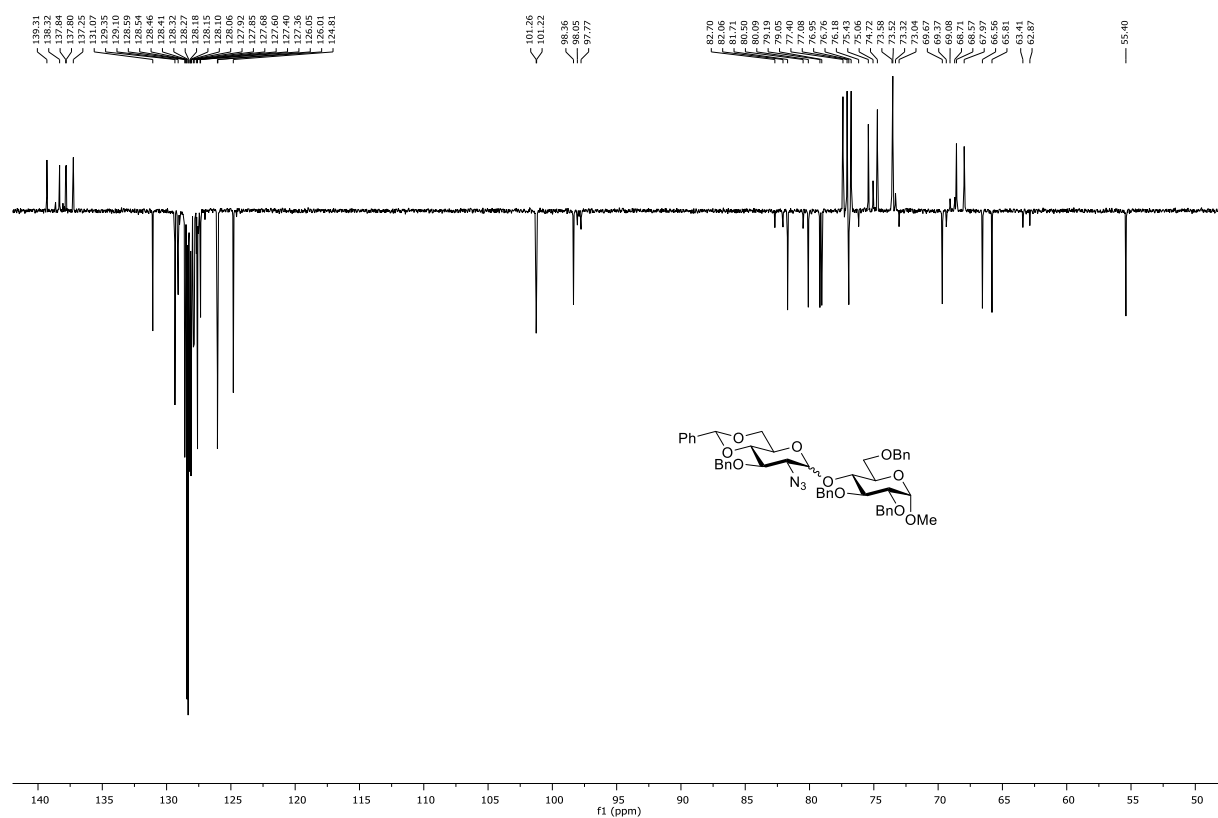

$^1\text{H}$ - $^1\text{H}$  COSY NMR,  $\text{CDCl}_3$

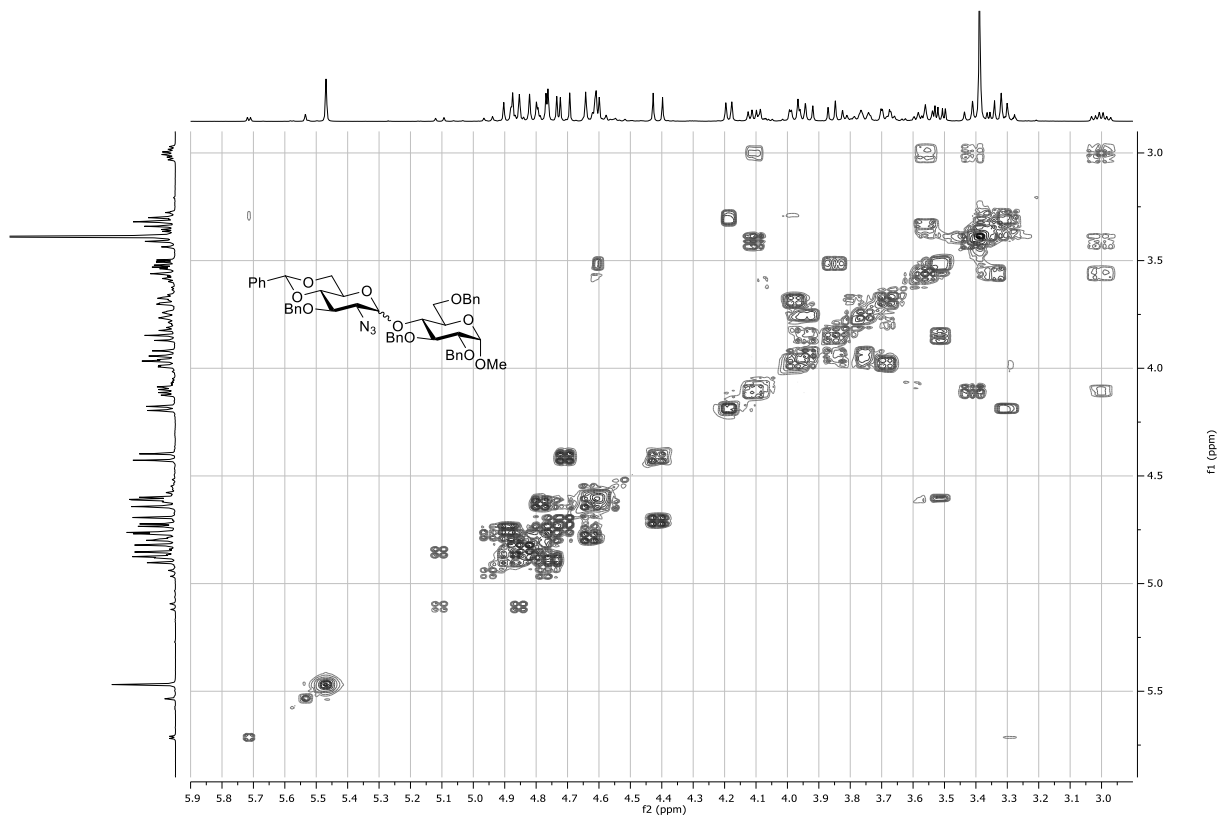

$^1\text{H}$ - $^{13}\text{C}$  HSQC NMR,  $\text{CDCl}_3$

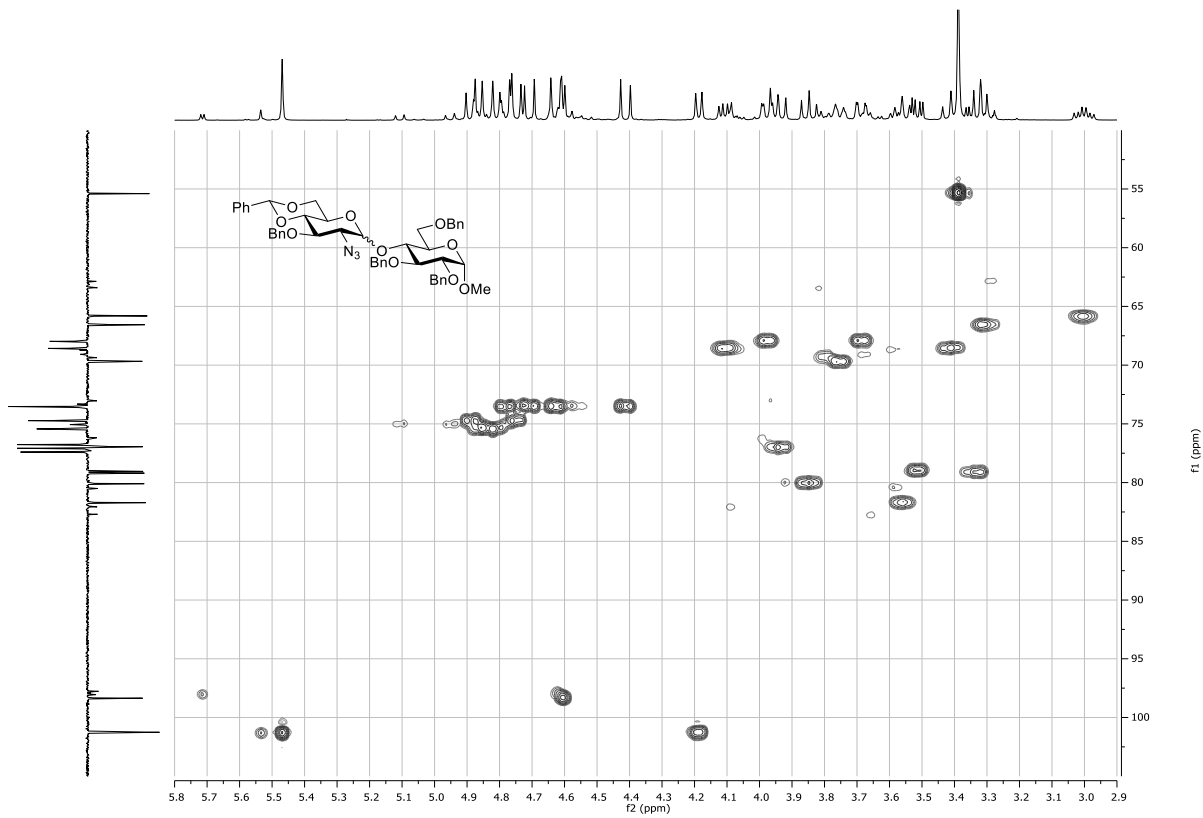



$^1\text{H}$ - $^1\text{H}$  TOCSY NMR,  $\text{CDCl}_3$

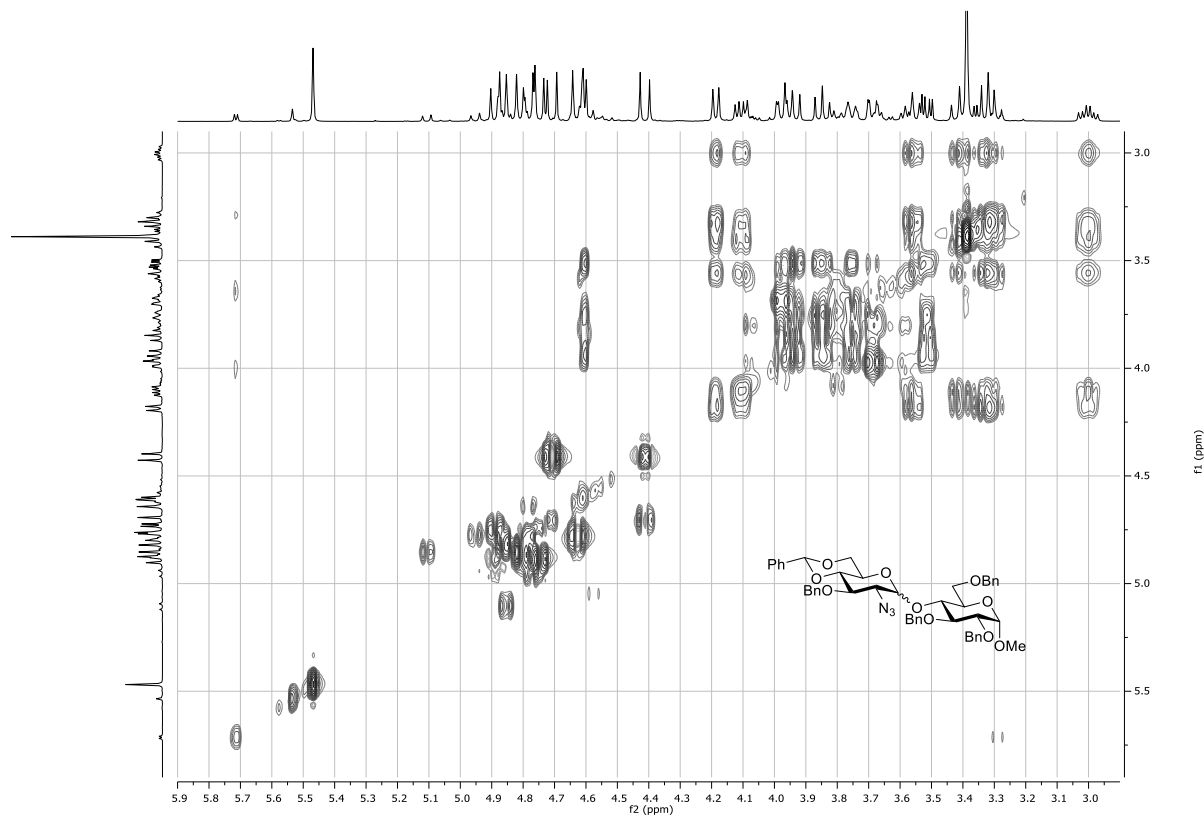

Methyl (Methyl 4-*O*-[2-azido-3-*O*-benzyl-4,6-*O*-benzylidene-2-deoxy- $\alpha$ - $\beta$ -D-glucopyranosyl]-2,3-di-*O*-benzyl- $\alpha$ -D-glucopyranosyl uronate) (3F).

$^1\text{H}$  NMR, 400 MHz,  $\text{CDCl}_3$

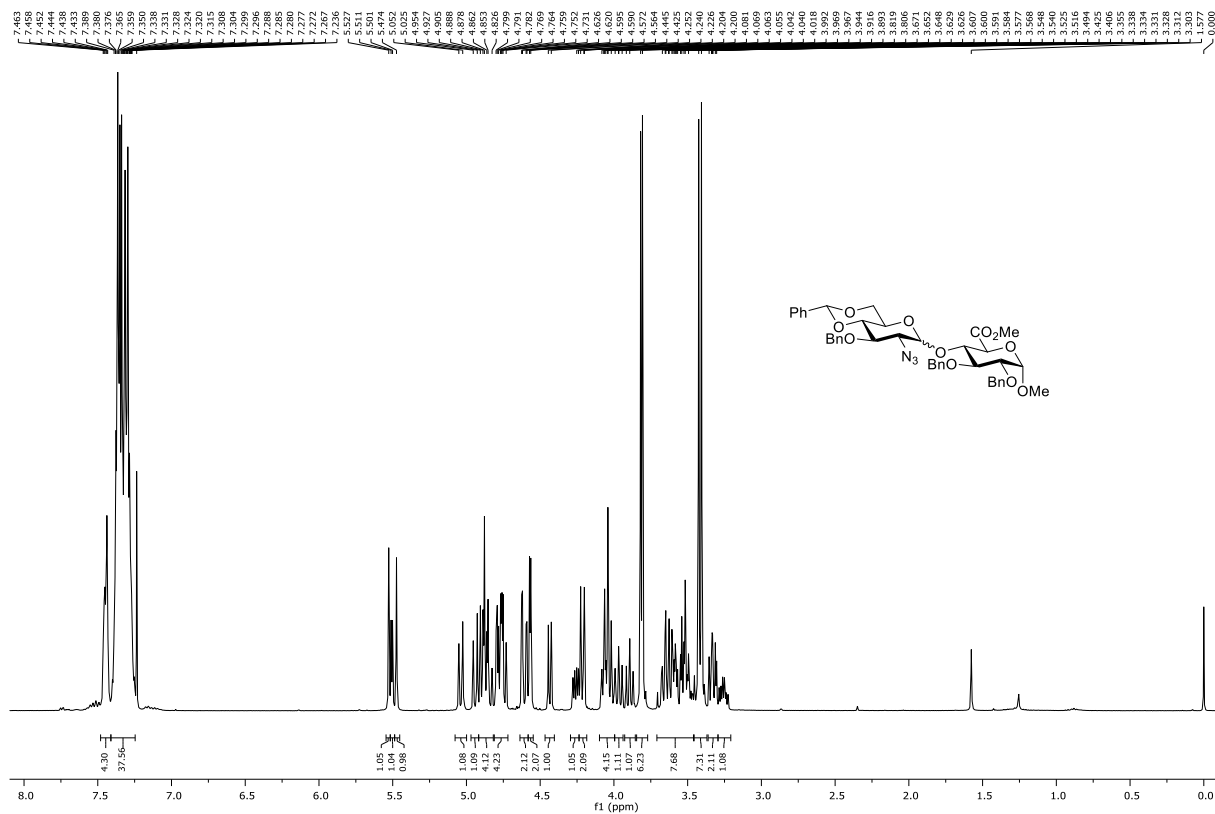

$^{13}\text{C}$ -APT NMR, 101 MHz,  $\text{CDCl}_3$

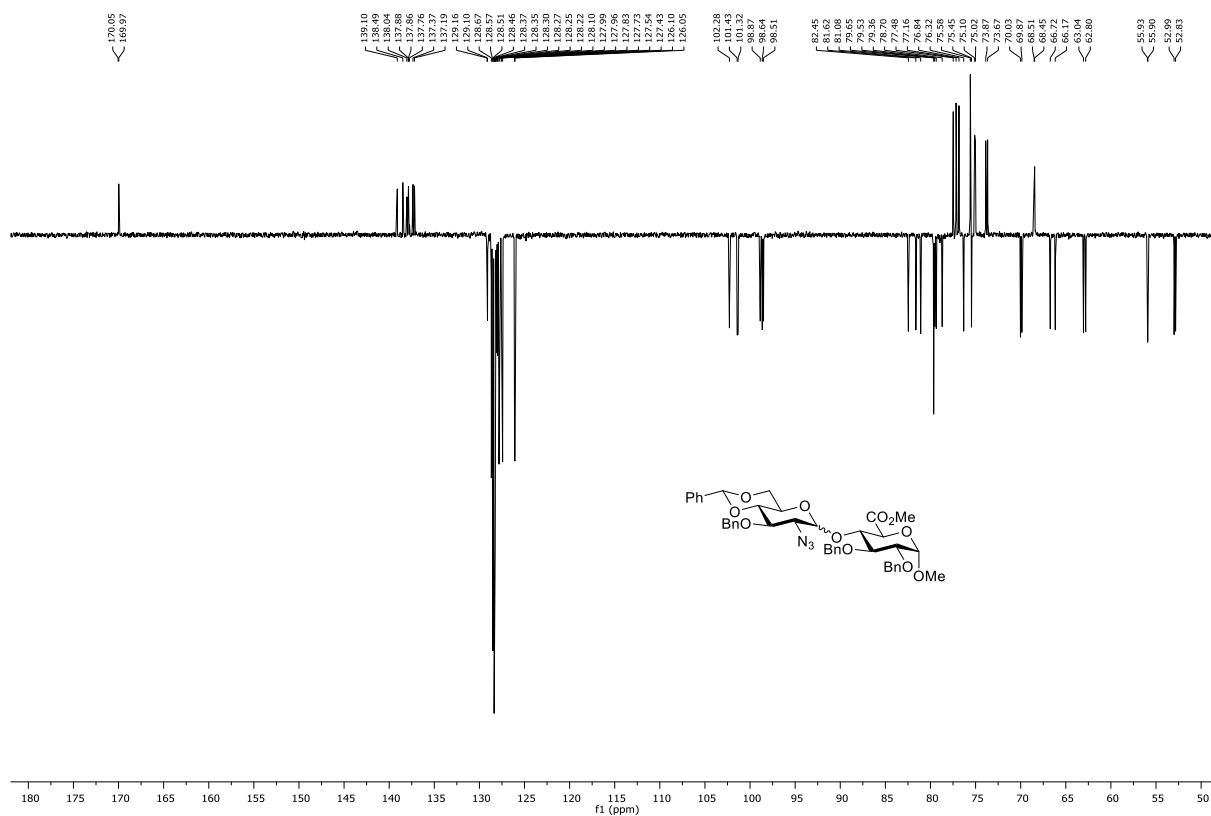

$^1\text{H}$ - $^1\text{H}$  COSY NMR,  $\text{CDCl}_3$

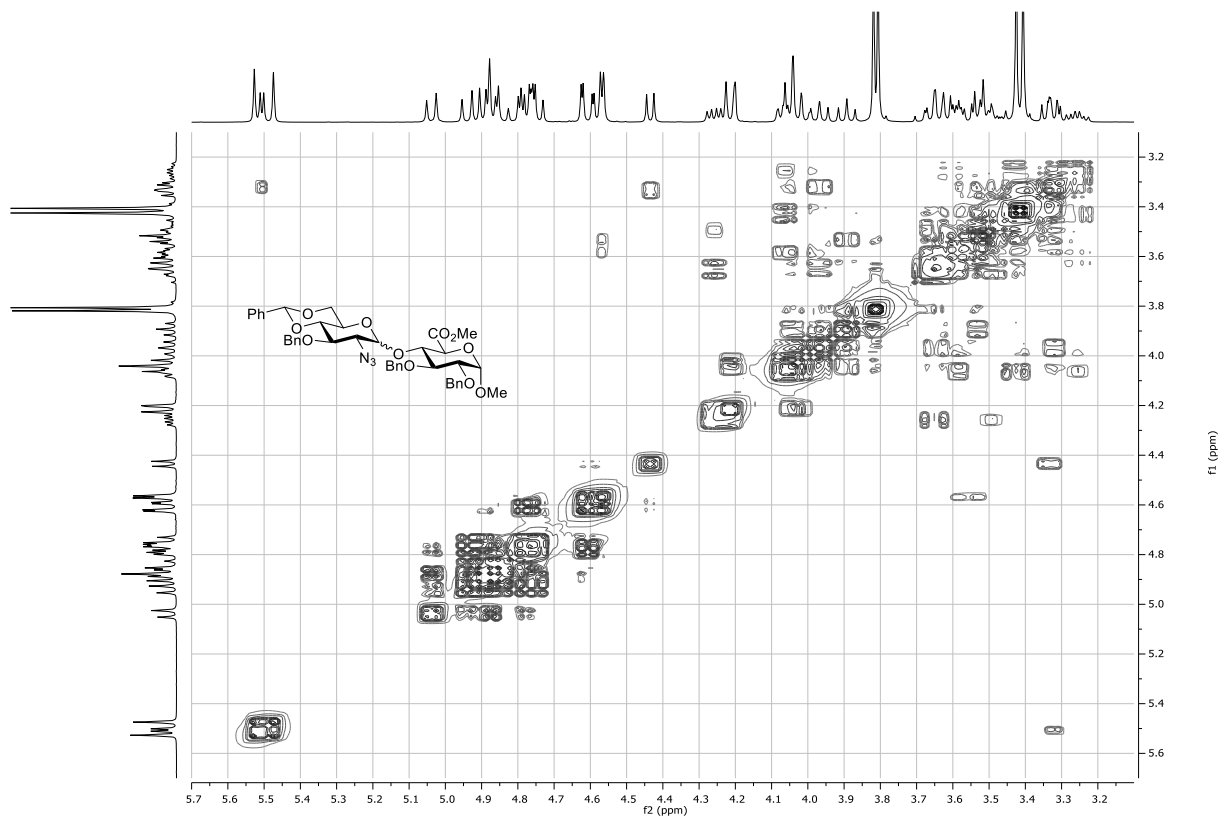

$^1\text{H}$ - $^{13}\text{C}$  HSQC NMR,  $\text{CDCl}_3$

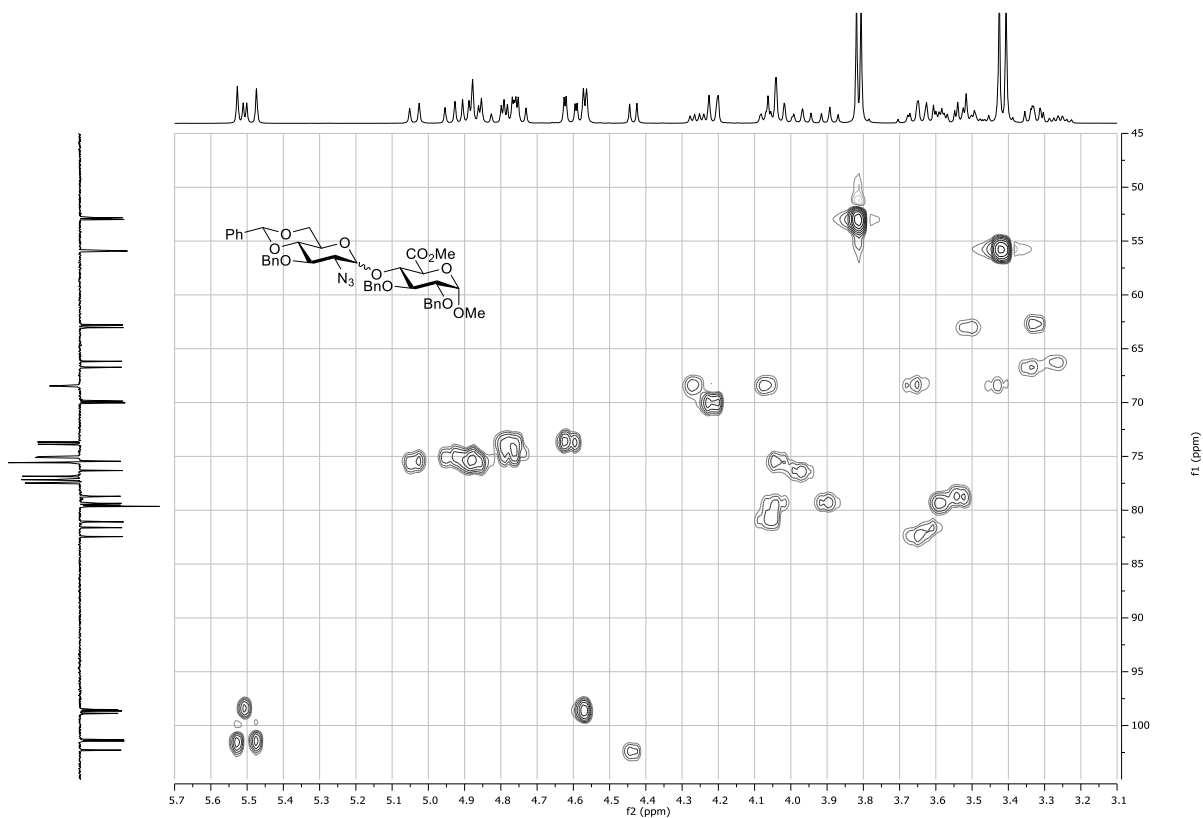

$^1\text{H}$ - $^{13}\text{C}$  HMBC NMR,  $\text{CDCl}_3$

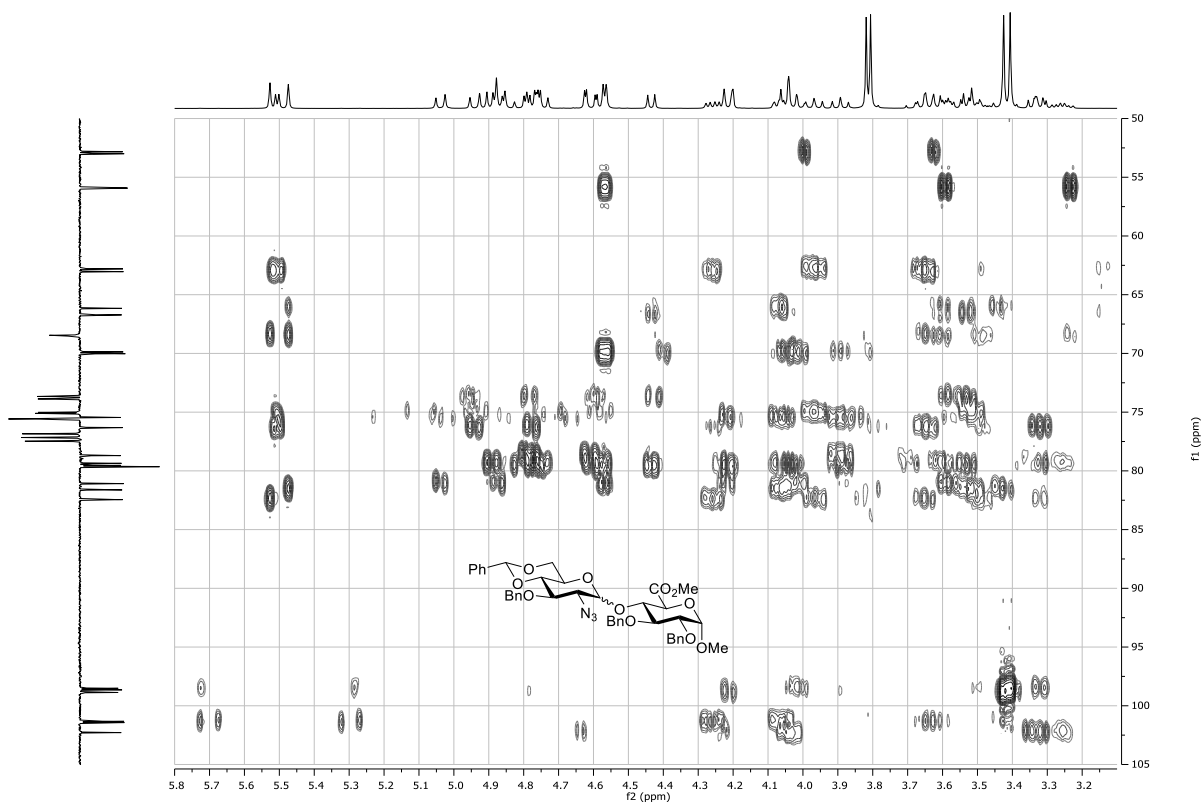

2,2-Difluoroethyl 2-azido-3-*O*-benzyl-4,6-*O*-benzylidene-2-deoxy- $\alpha$ / $\beta$ -D-glucopyranoside (**3G**).

$^1\text{H}$  NMR, 400 MHz,  $\text{CDCl}_3$

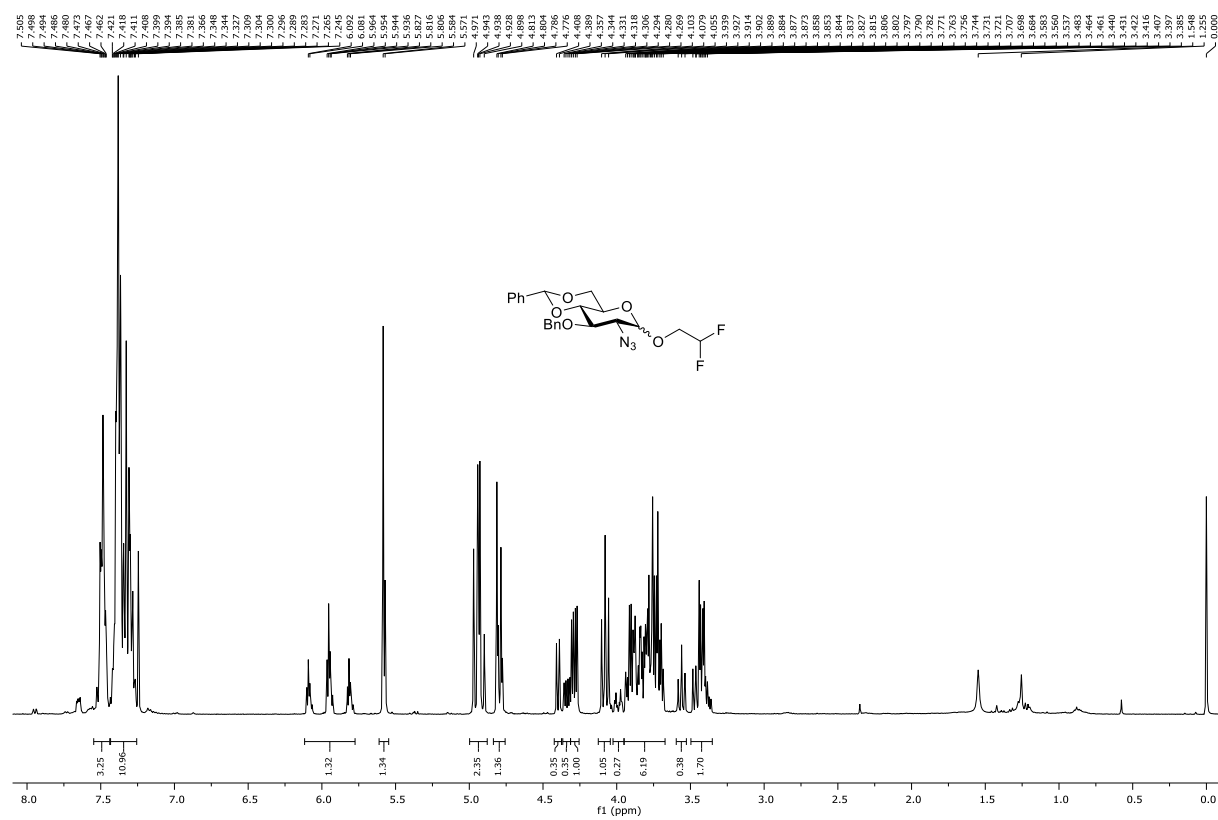

$^{13}\text{C}$ -APT NMR, 101 MHz,  $\text{CDCl}_3$

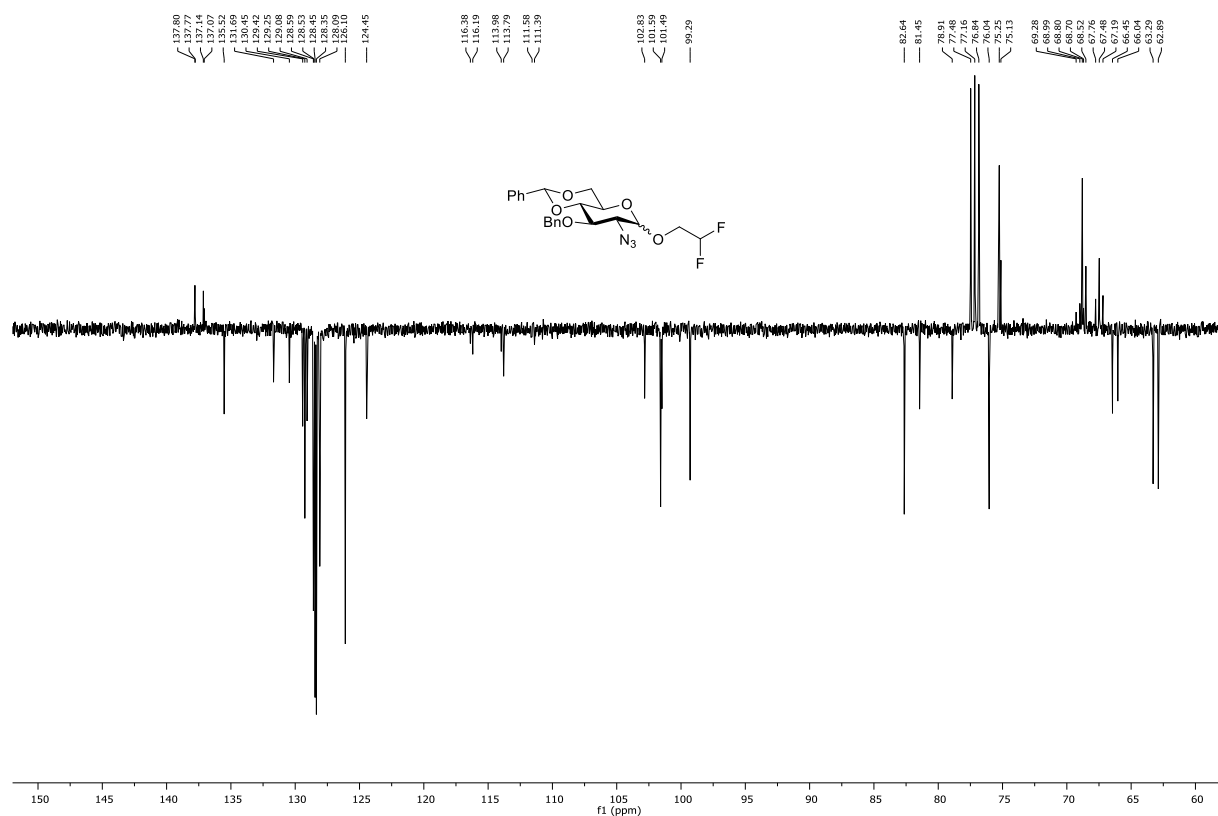

$^1\text{H}$ - $^1\text{H}$  COSY NMR,  $\text{CDCl}_3$

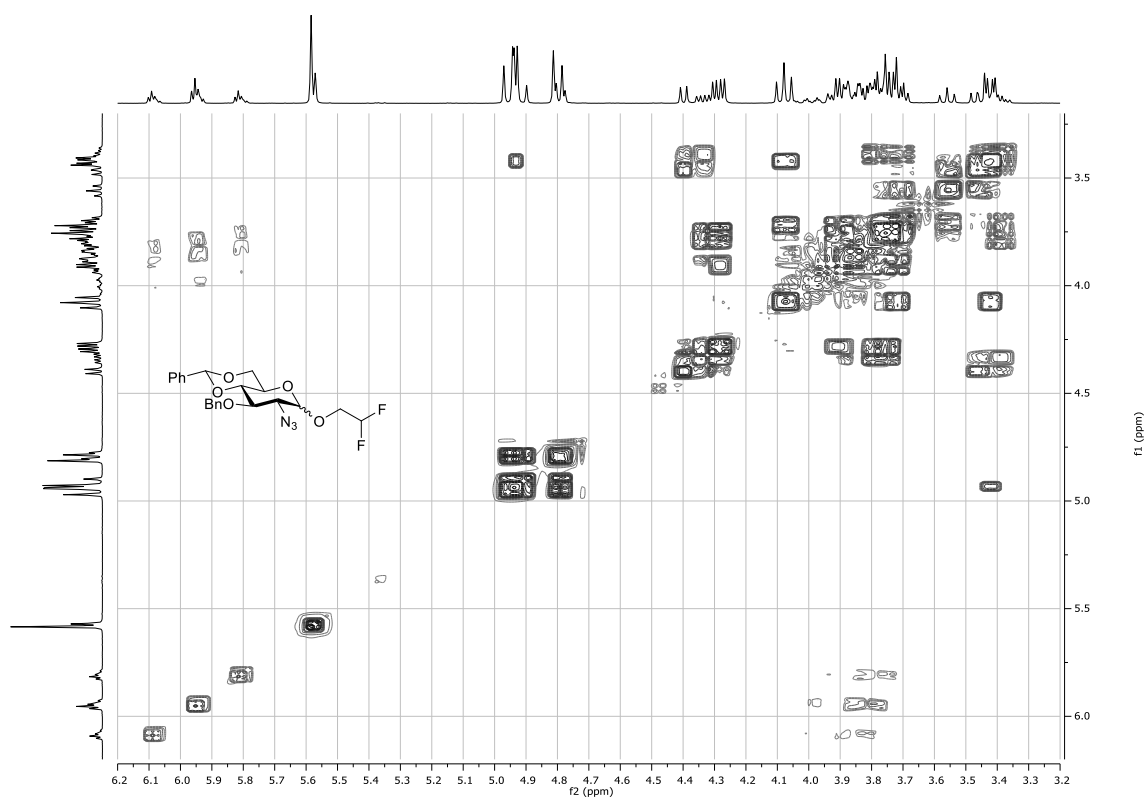

$^1\text{H}$ - $^{13}\text{C}$  HSQC NMR,  $\text{CDCl}_3$

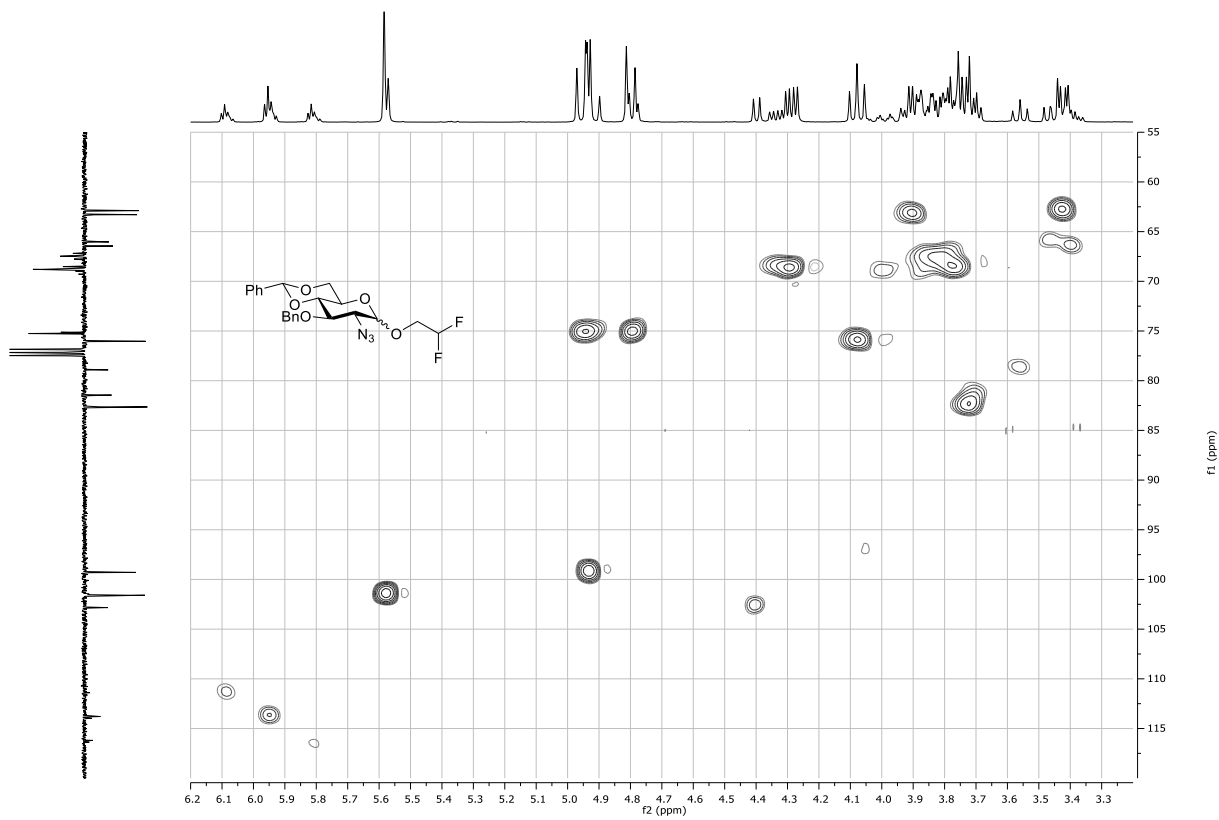

$^1\text{H}$ - $^{13}\text{C}$  HMBC-GATED NMR,  $\text{CDCl}_3$

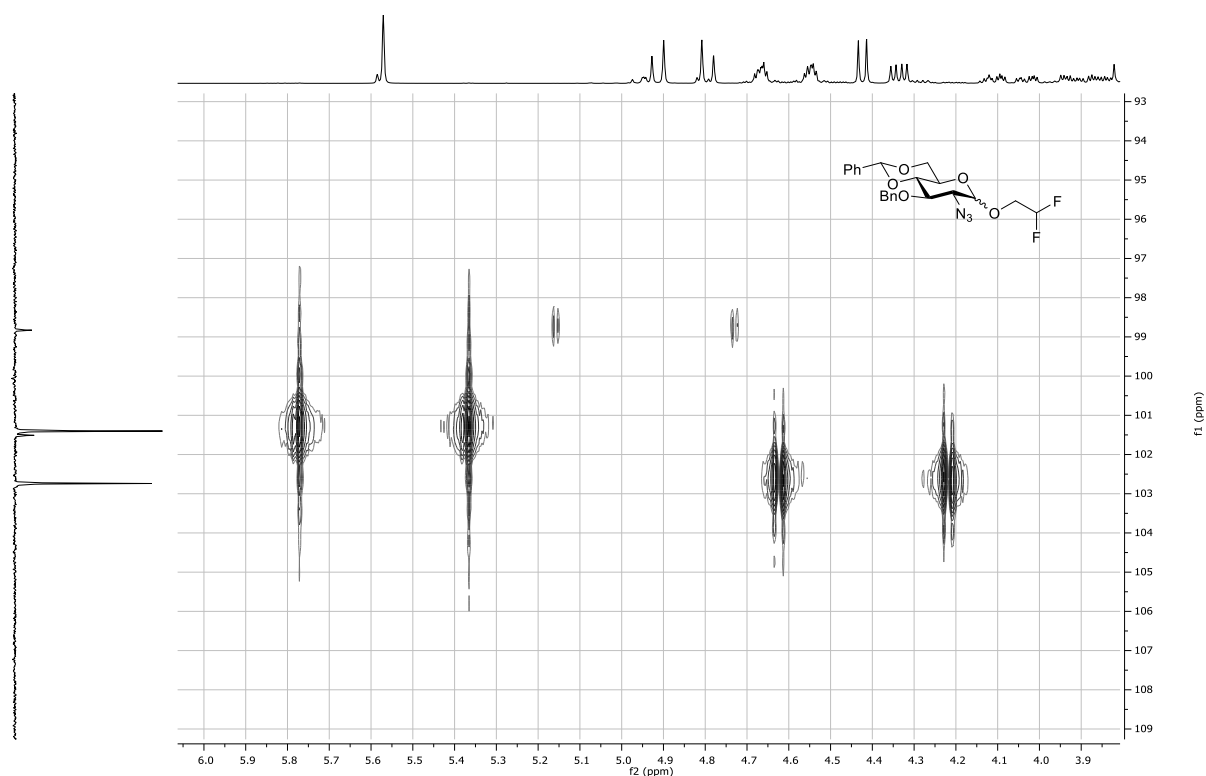

Methyl 4-*O*-(2-azido-3-*O*-benzyl-4,6-*O*-benzylidene-2-deoxy- $\alpha$ - $\beta$ -D-glucopyranosyl)-2,3,6-tri-*O*-benzyl- $\beta$ -D-galactopyranoside (**3H**).

$^1\text{H}$  NMR, 400 MHz,  $\text{CDCl}_3$

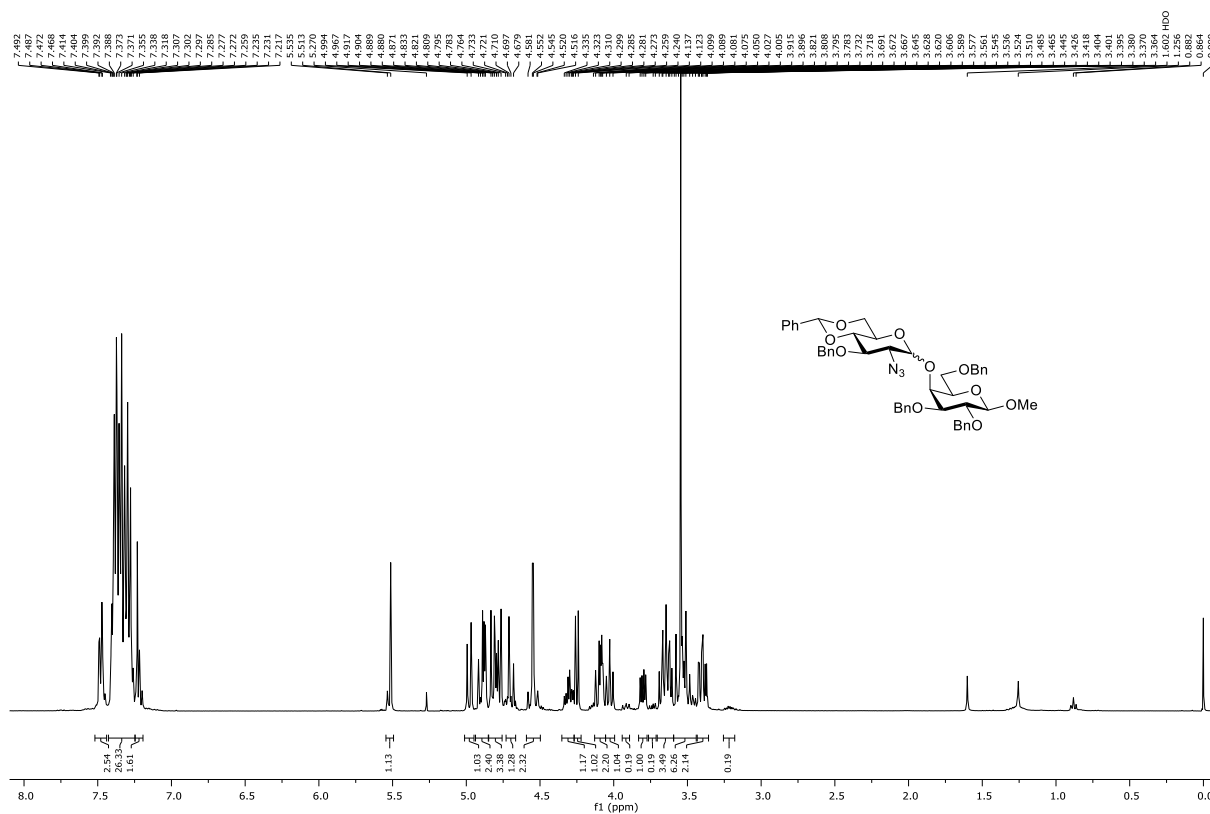

$^{13}\text{C}$ -APT NMR, 101 MHz,  $\text{CDCl}_3$

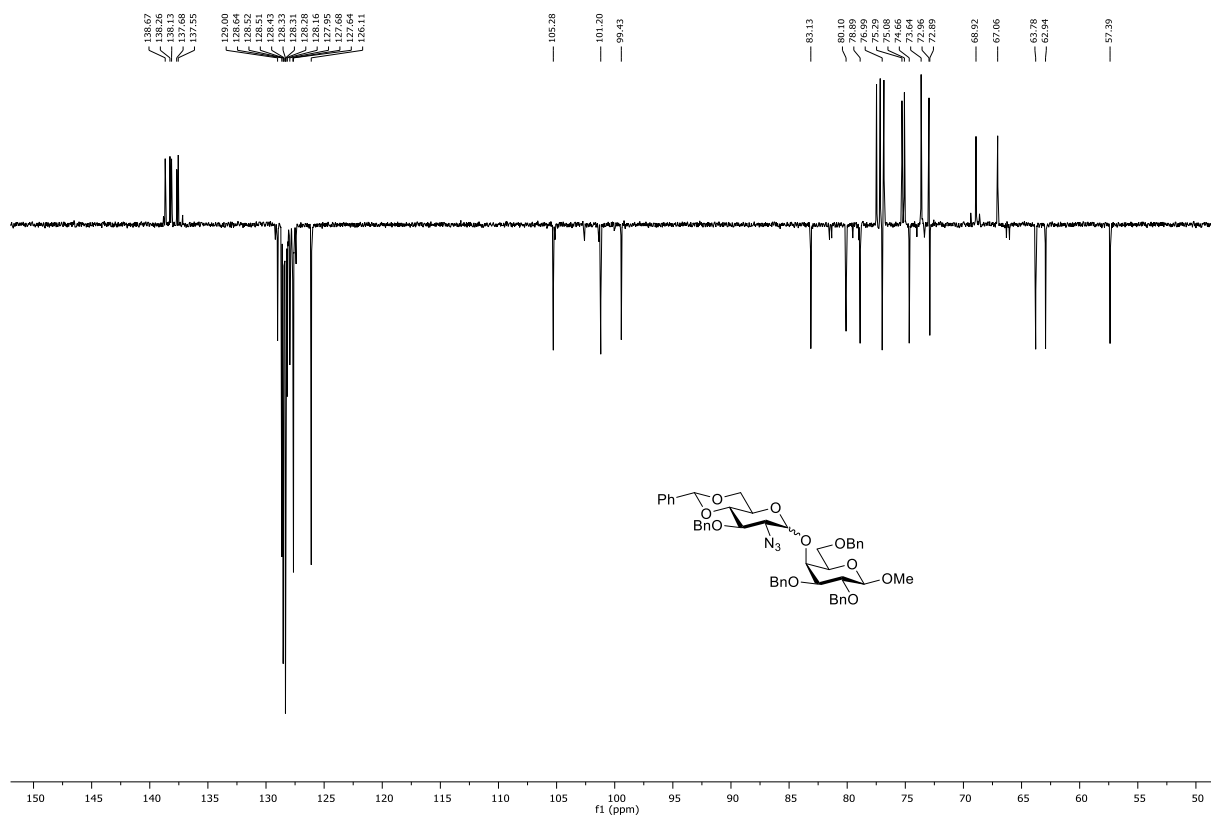

$^1\text{H}$ - $^1\text{H}$  COSY NMR,  $\text{CDCl}_3$

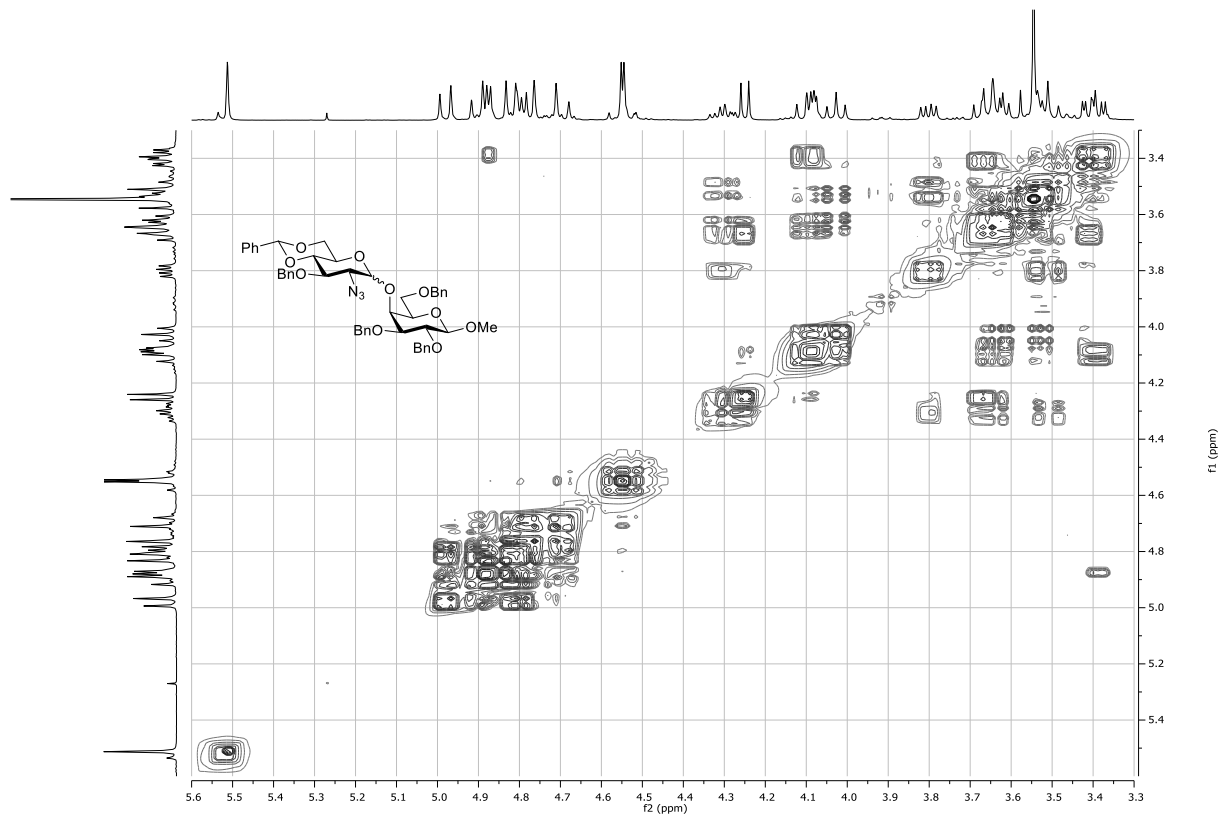

$^1\text{H}$ - $^{13}\text{C}$  HSQC NMR,  $\text{CDCl}_3$

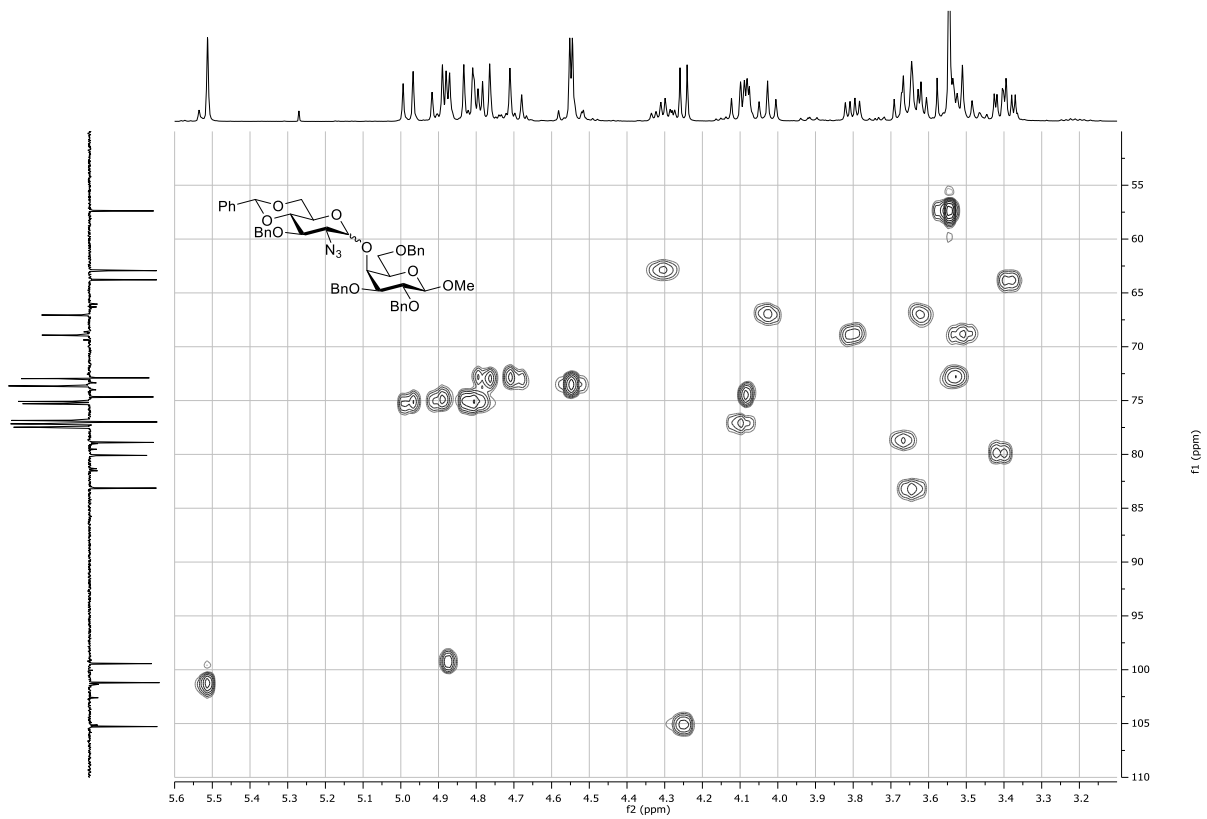

$^1\text{H}$ - $^{13}\text{C}$  HMBC NMR,  $\text{CDCl}_3$

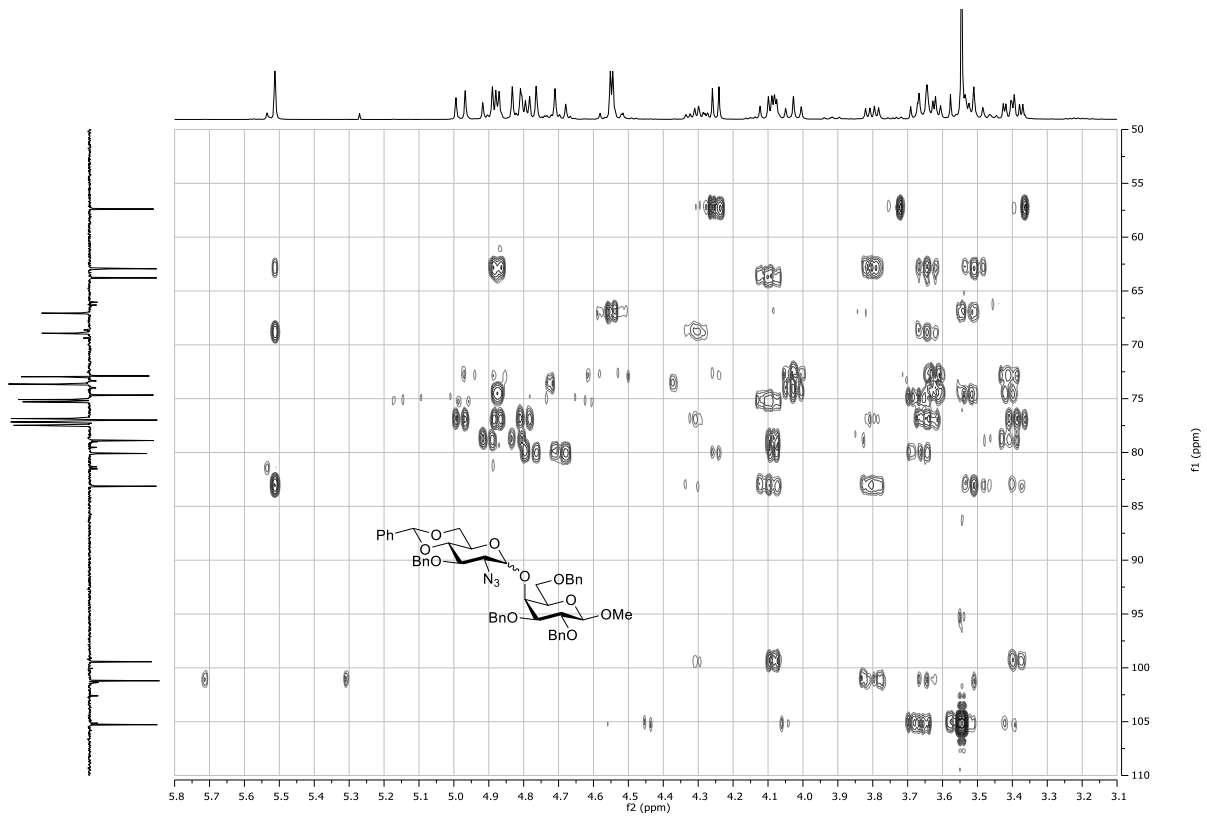



Methyl 2-*O*-(2-azido-3-*O*-benzyl-4,6-*O*-benzylidene-2-deoxy- $\alpha$ / $\beta$ -D-glucopyranosyl)-3-*O*-benzyl-4,6-*O*-benzylidene- $\alpha$ -D-mannopyranoside (**31**).

$^1\text{H}$  NMR, 400 MHz,  $\text{CDCl}_3$

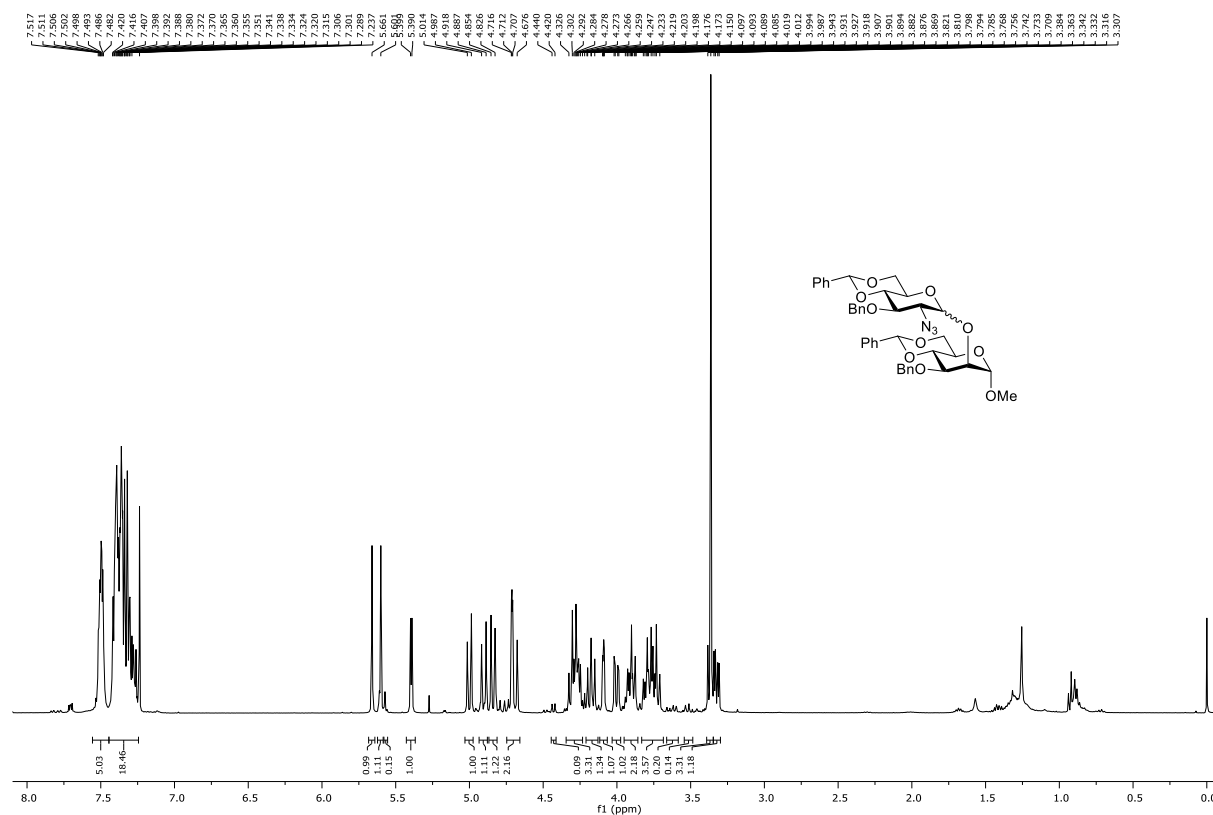

$^{13}\text{C}$ -APT NMR, 101 MHz,  $\text{CDCl}_3$

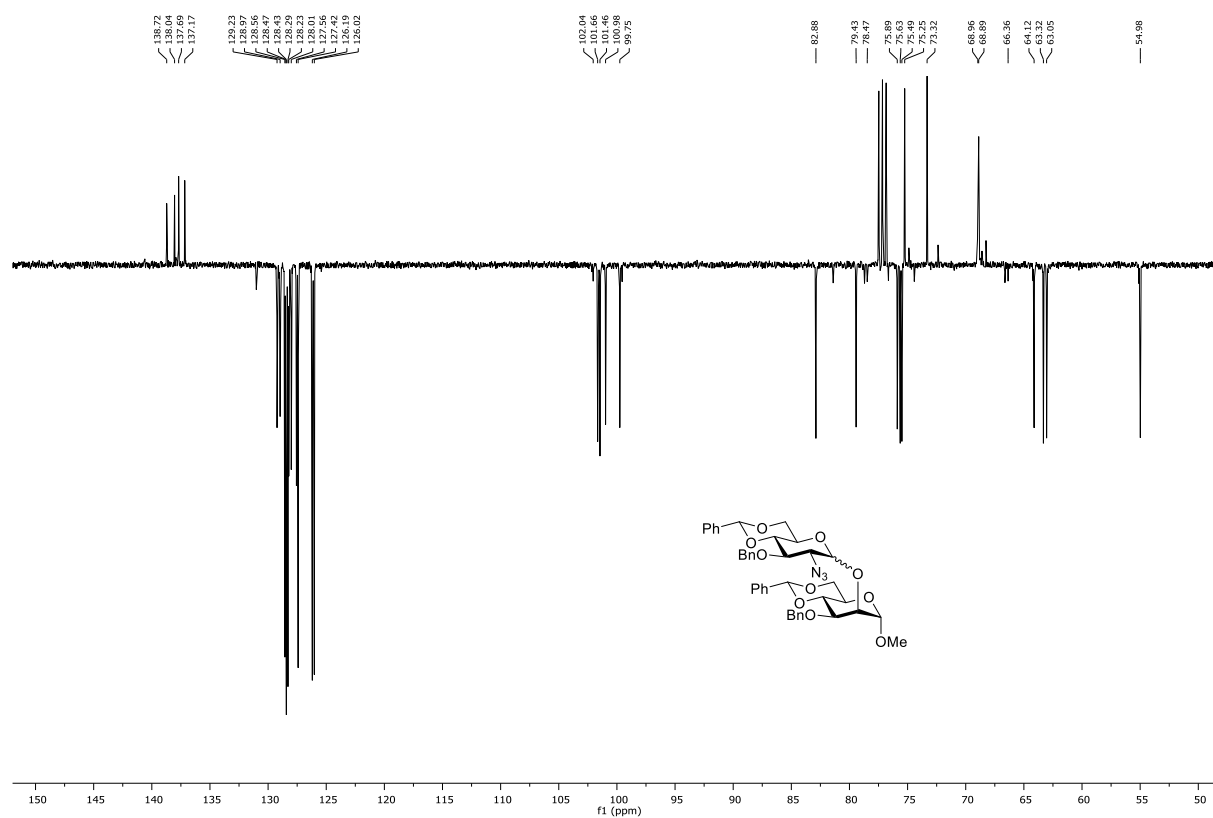

$^1\text{H}$ - $^1\text{H}$  COSY NMR,  $\text{CDCl}_3$

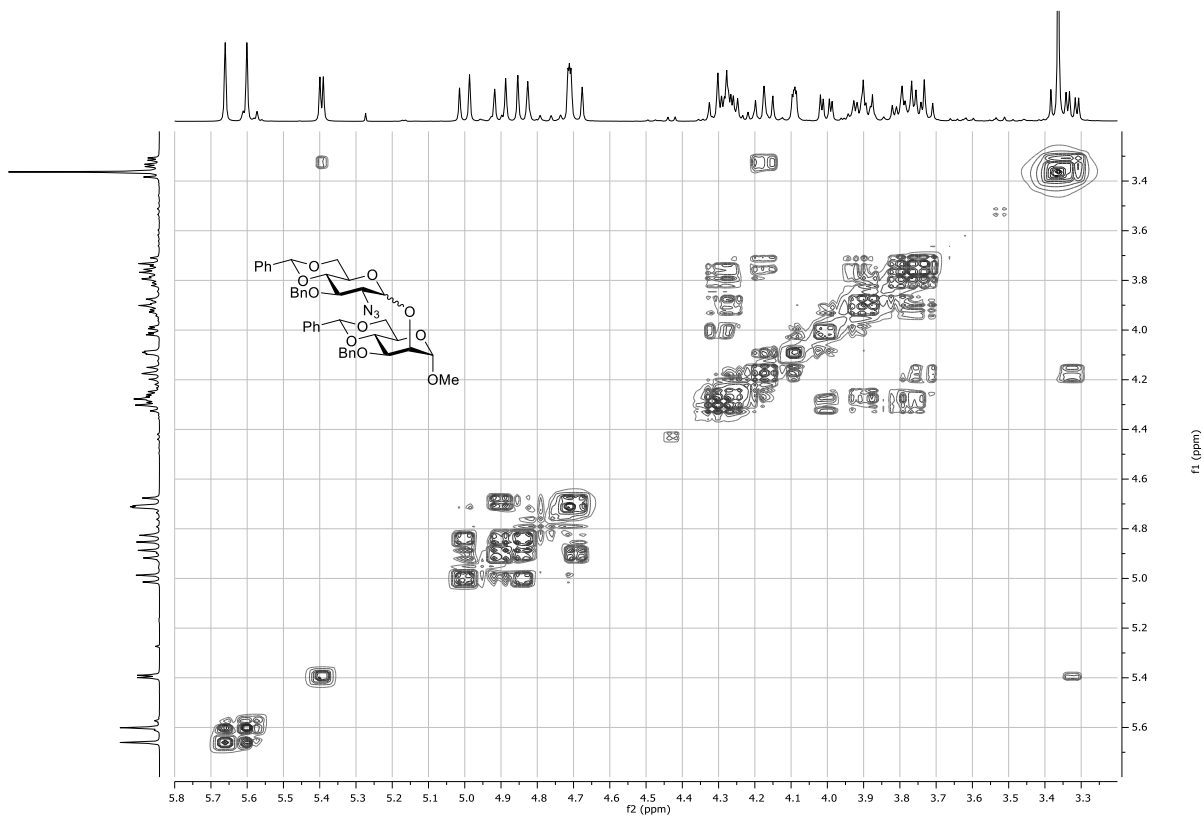

$^1\text{H}$ - $^{13}\text{C}$  HSQC NMR,  $\text{CDCl}_3$

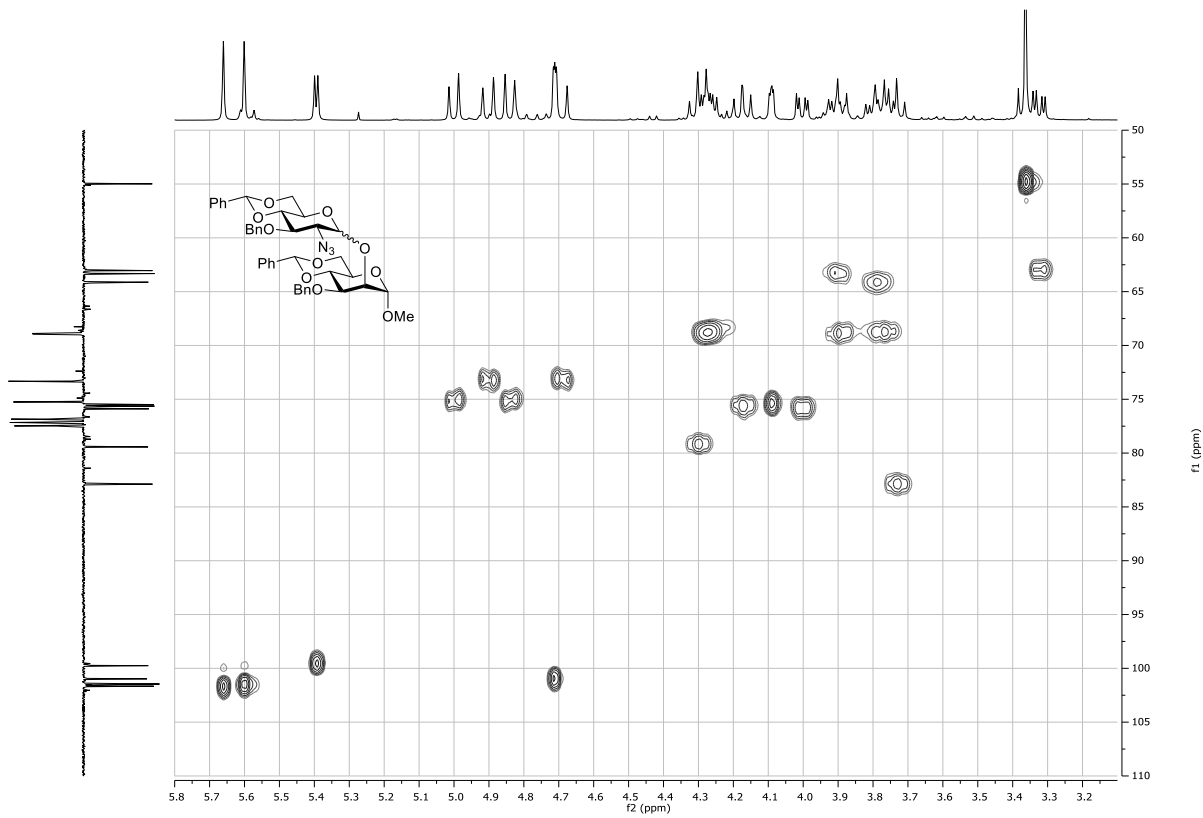

$^1\text{H}$ - $^{13}\text{C}$  HMBC NMR,  $\text{CDCl}_3$

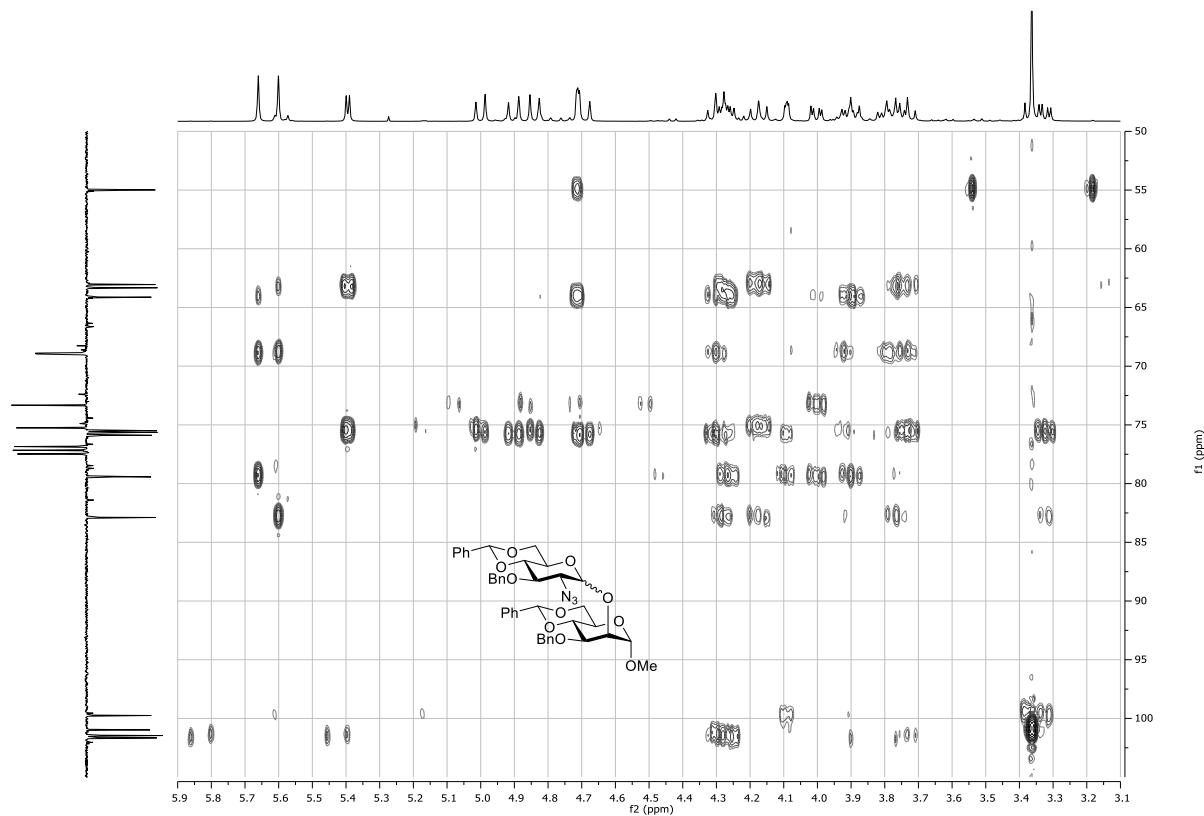

2,2,2-Trifluoroethyl 2-azido-3-O-benzyl-4,6-O-benzylidene-2-deoxy- $\alpha$ -D-glucopyranoside (**3J**).

$^1\text{H}$  NMR, 400 MHz,  $\text{CDCl}_3$

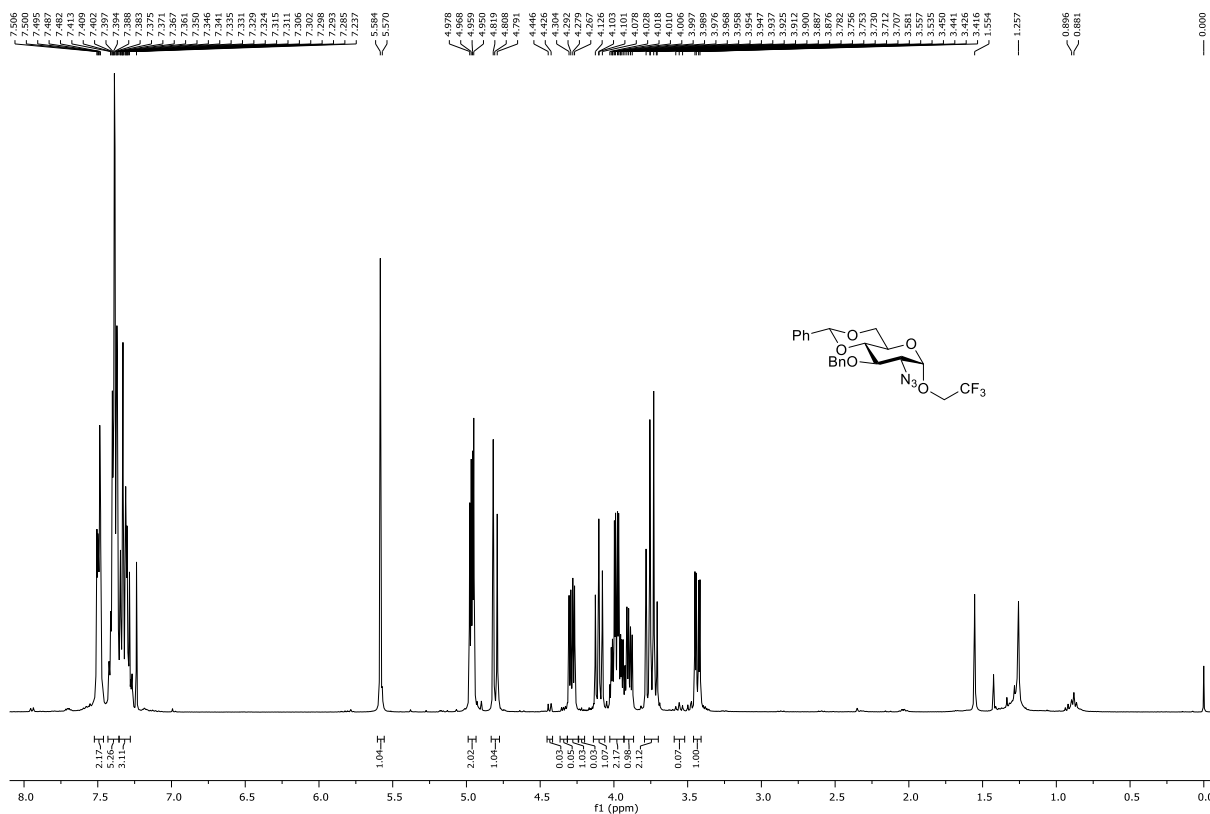

$^{13}\text{C}$ -APT NMR, 101 MHz,  $\text{CDCl}_3$

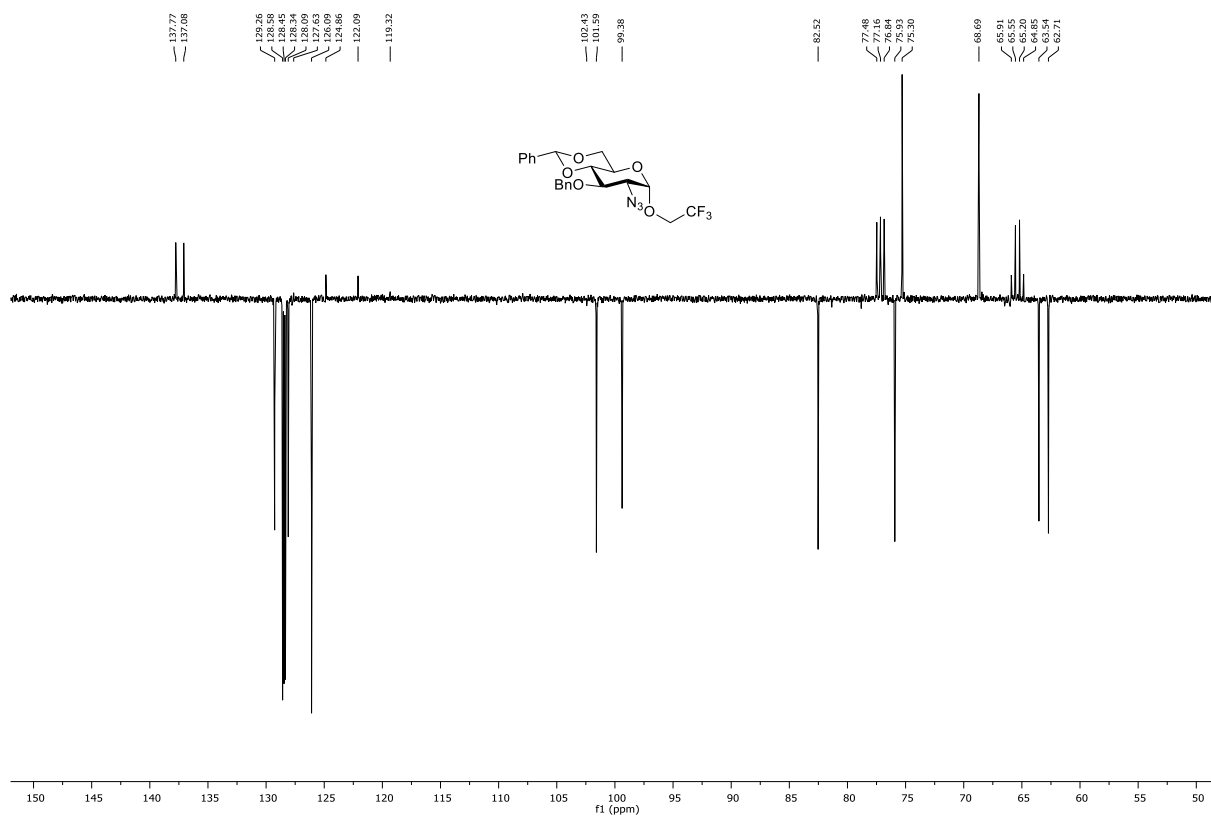

$^1\text{H}$ - $^1\text{H}$  COSY NMR,  $\text{CDCl}_3$

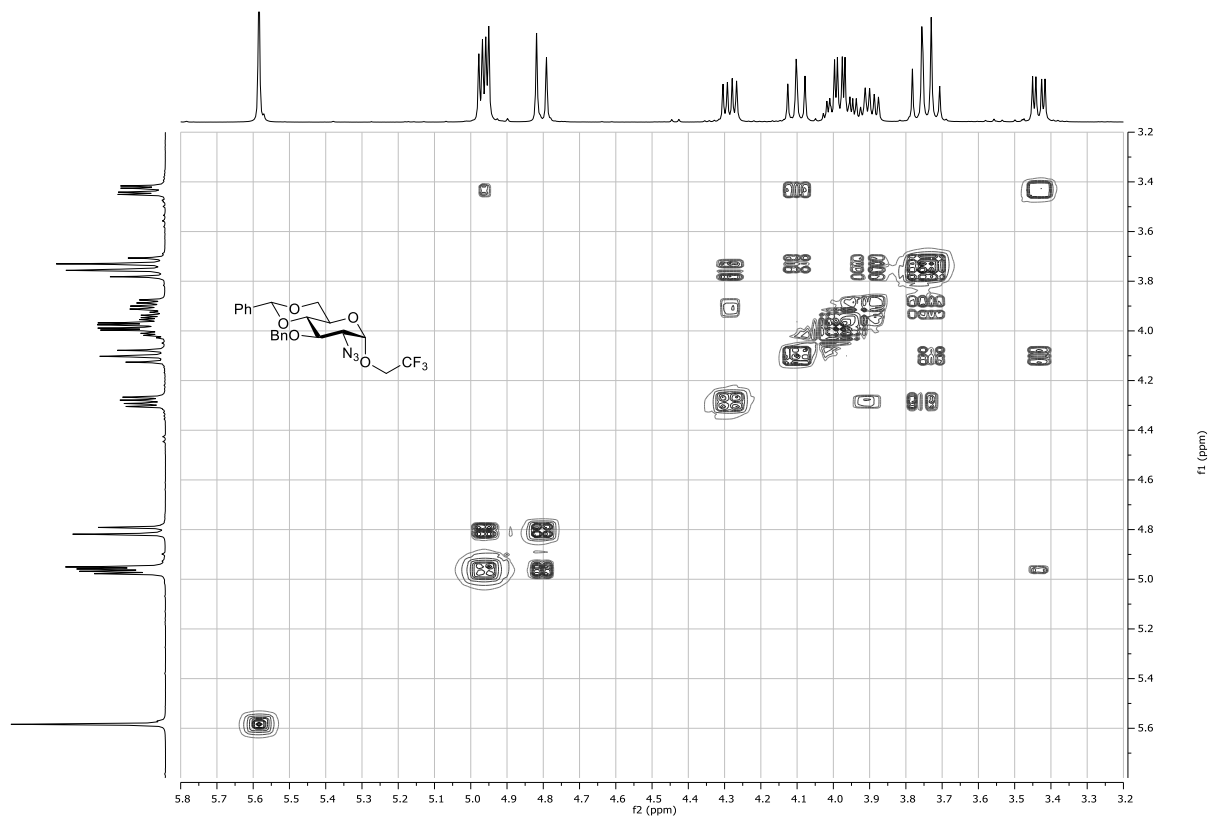

$^1\text{H}$ - $^{13}\text{C}$  HSQC NMR,  $\text{CDCl}_3$

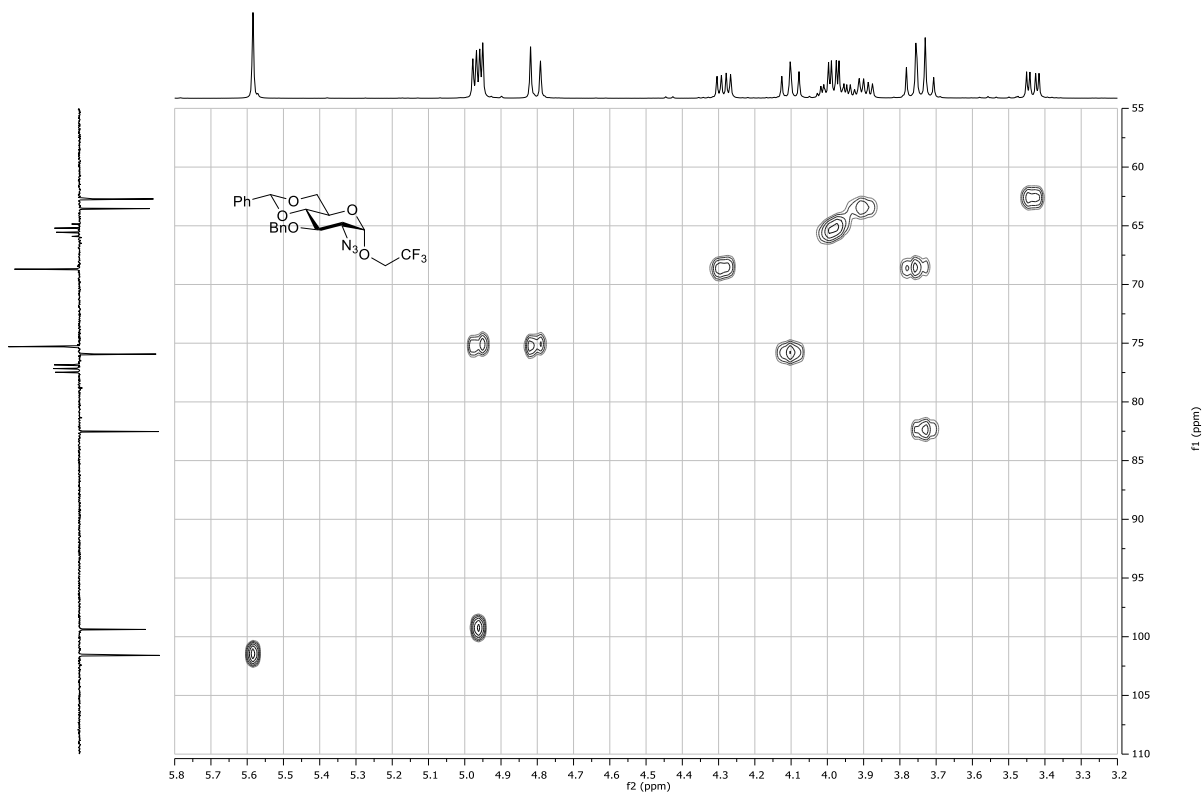

$^1\text{H}$ - $^{13}\text{C}$  HMBC-GATED NMR,  $\text{CDCl}_3$

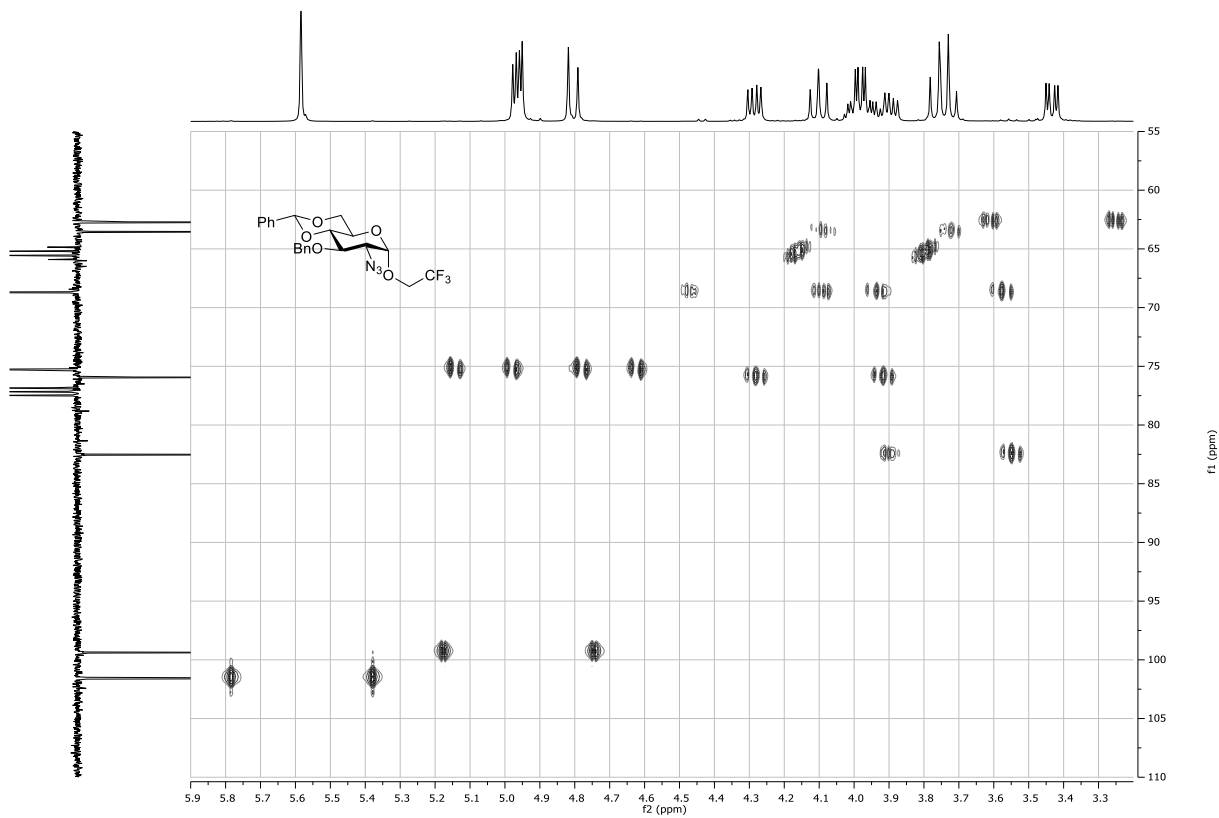

1,1,1,3,3,3-Hexafluoro-2-propyl 2-azido-3-*O*-benzyl-4,6-*O*-benzylidene-2-deoxy- $\alpha$ -D-glucopyranoside (**3K**).

$^1\text{H}$  NMR, 400 MHz,  $\text{CDCl}_3$

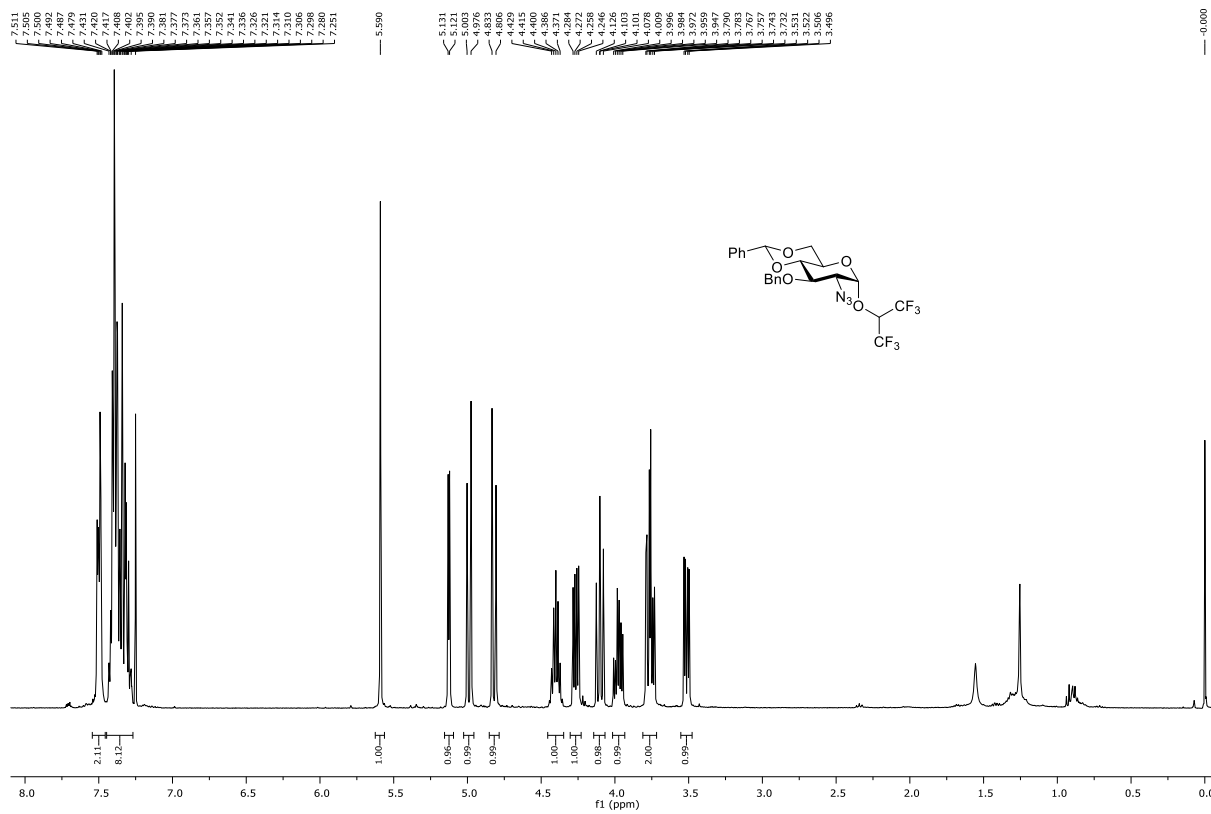

$^{13}\text{C}$ -APT NMR, 101 MHz,  $\text{CDCl}_3$

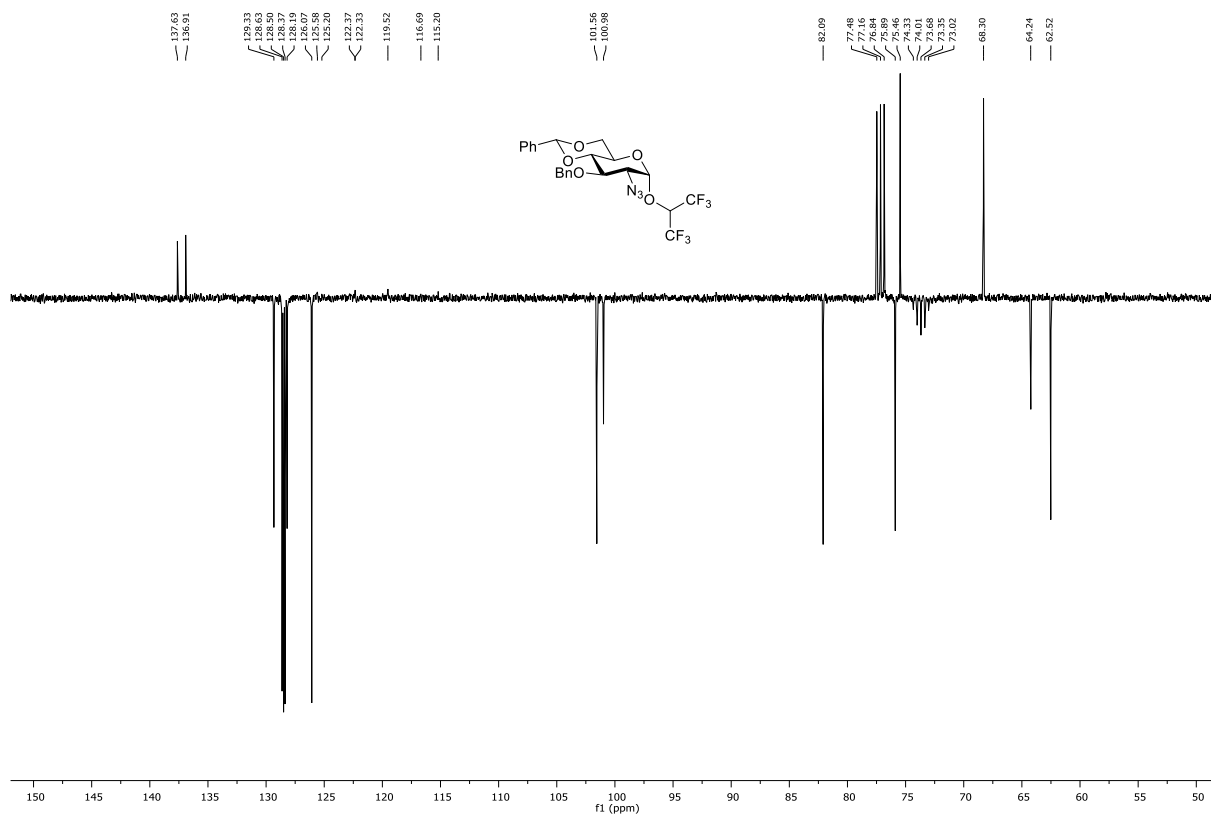

$^1\text{H}$ - $^1\text{H}$  COSY NMR,  $\text{CDCl}_3$

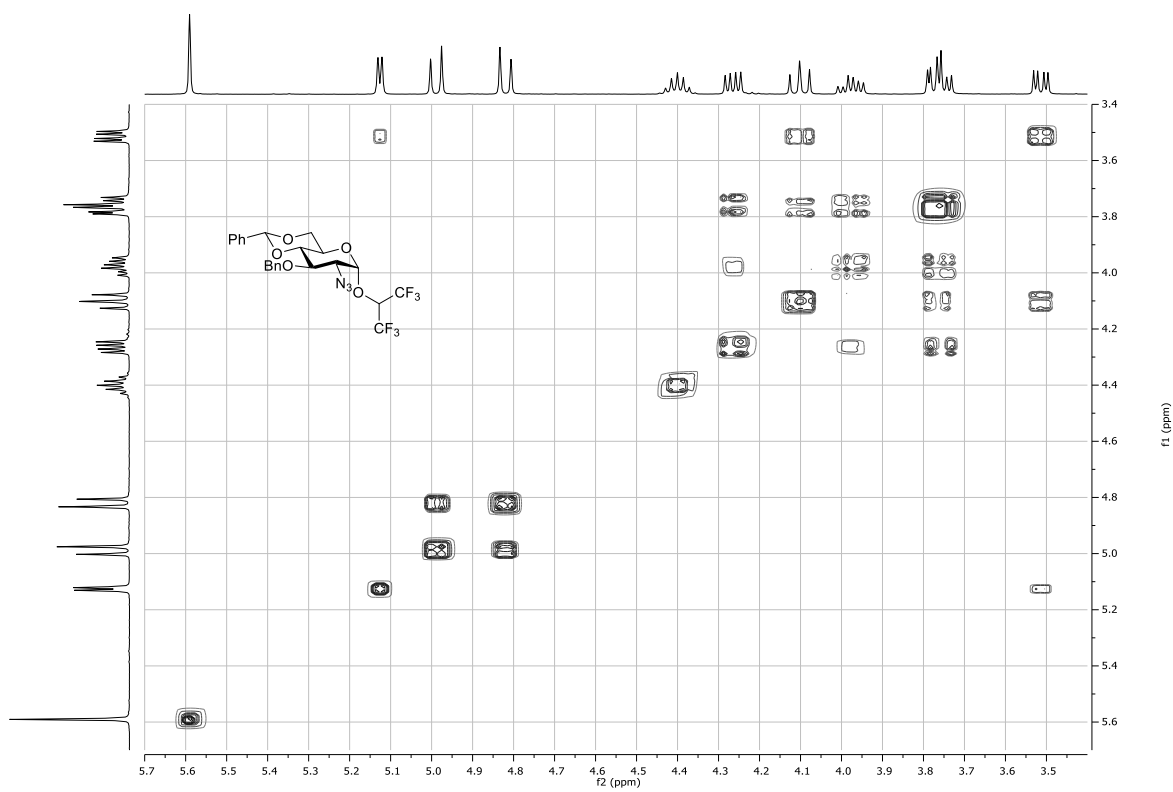

$^1\text{H}$ - $^{13}\text{C}$  HSQC NMR,  $\text{CDCl}_3$

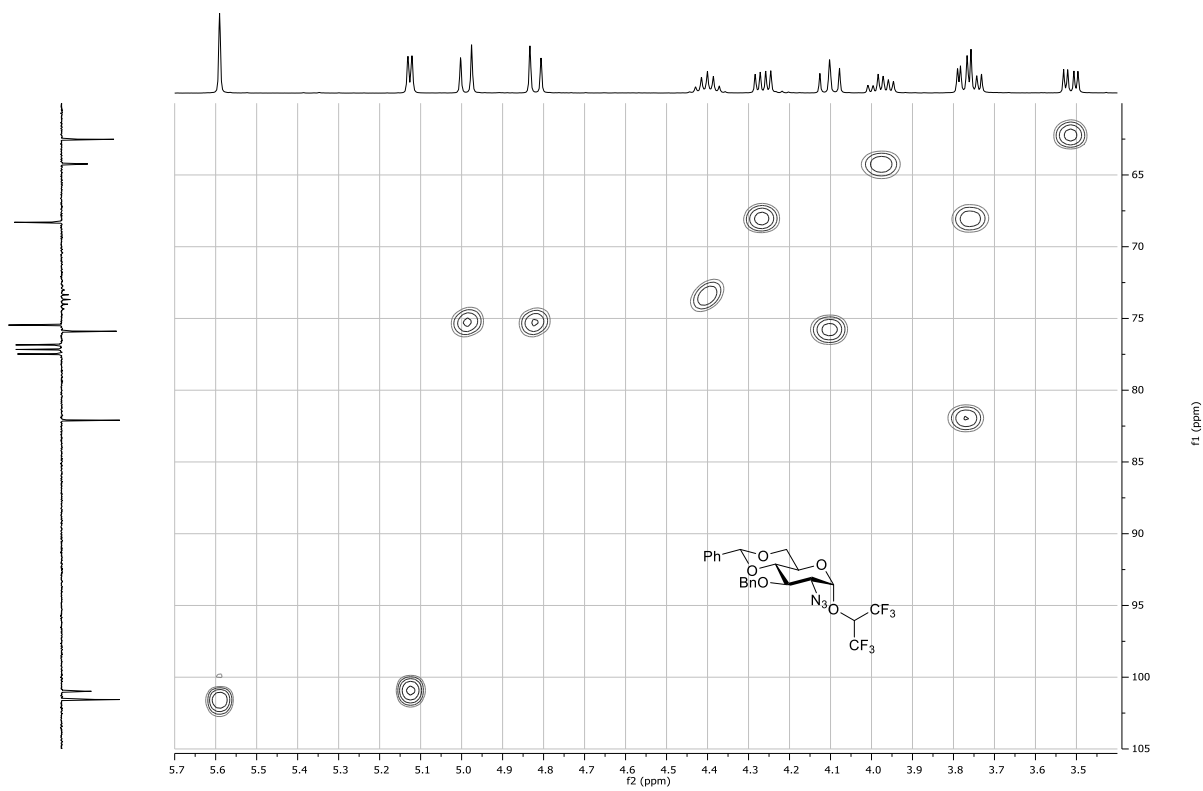

Ethyl 2-azido-3-*O*-benzoyl-4,6-*O*-benzylidene-2-deoxy- $\beta$ -D-glucopyranoside (**4A**).

$^1\text{H}$  NMR, 400 MHz,  $\text{CDCl}_3$

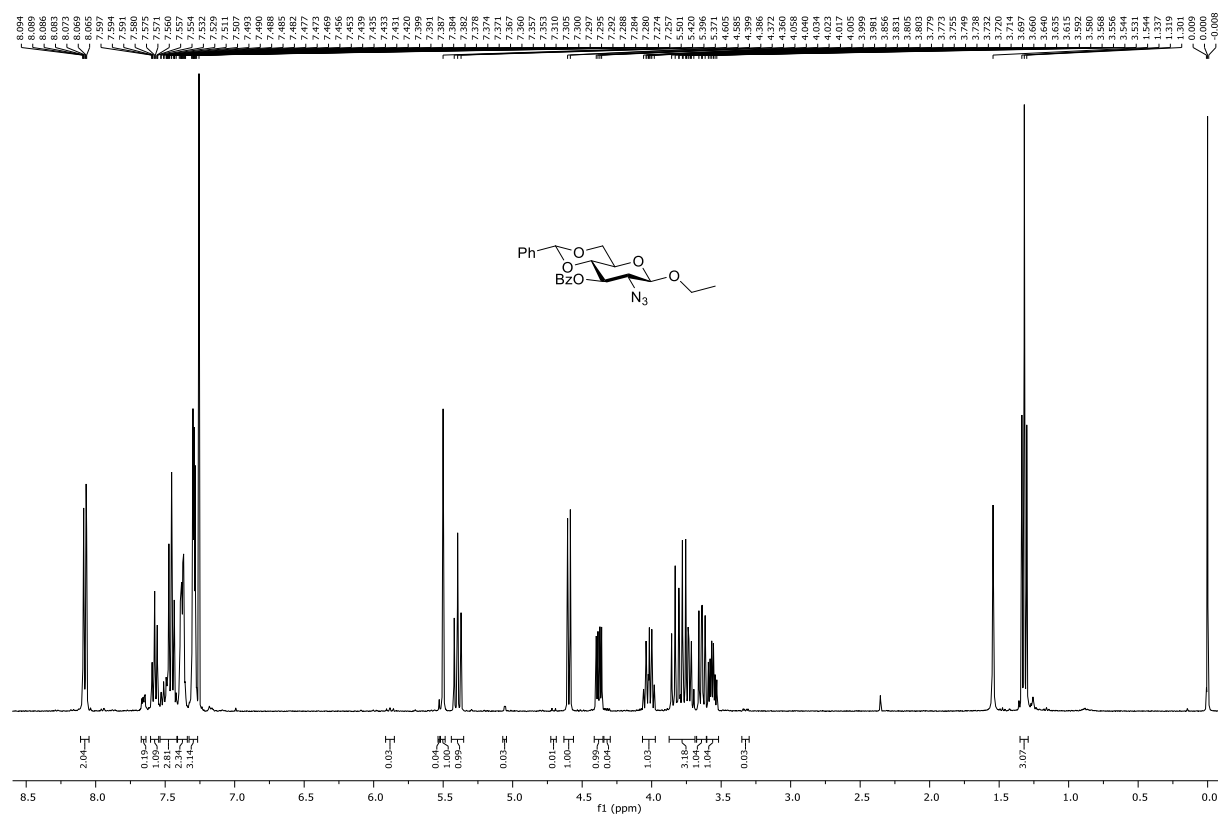

$^{13}\text{C}$ -APT NMR, 101 MHz,  $\text{CDCl}_3$

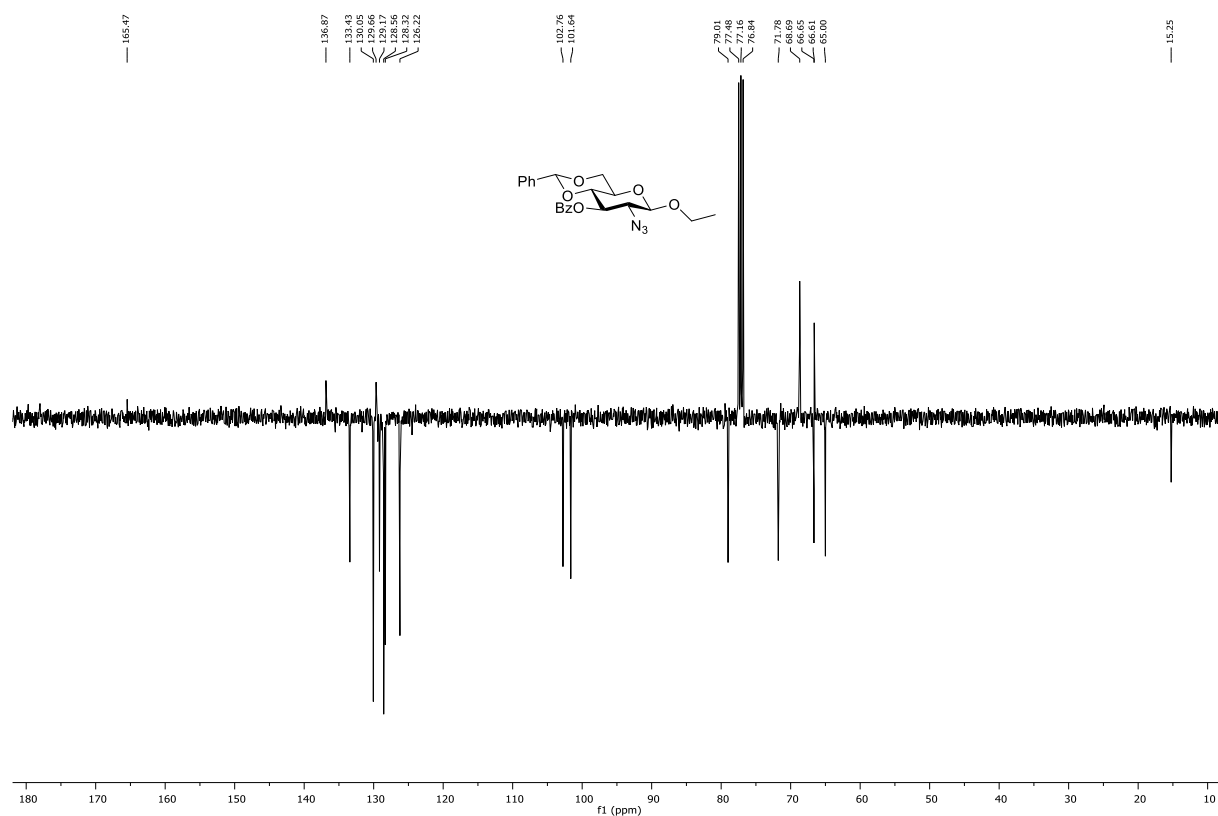



$^1\text{H}$ - $^1\text{H}$  COSY NMR,  $\text{CDCl}_3$

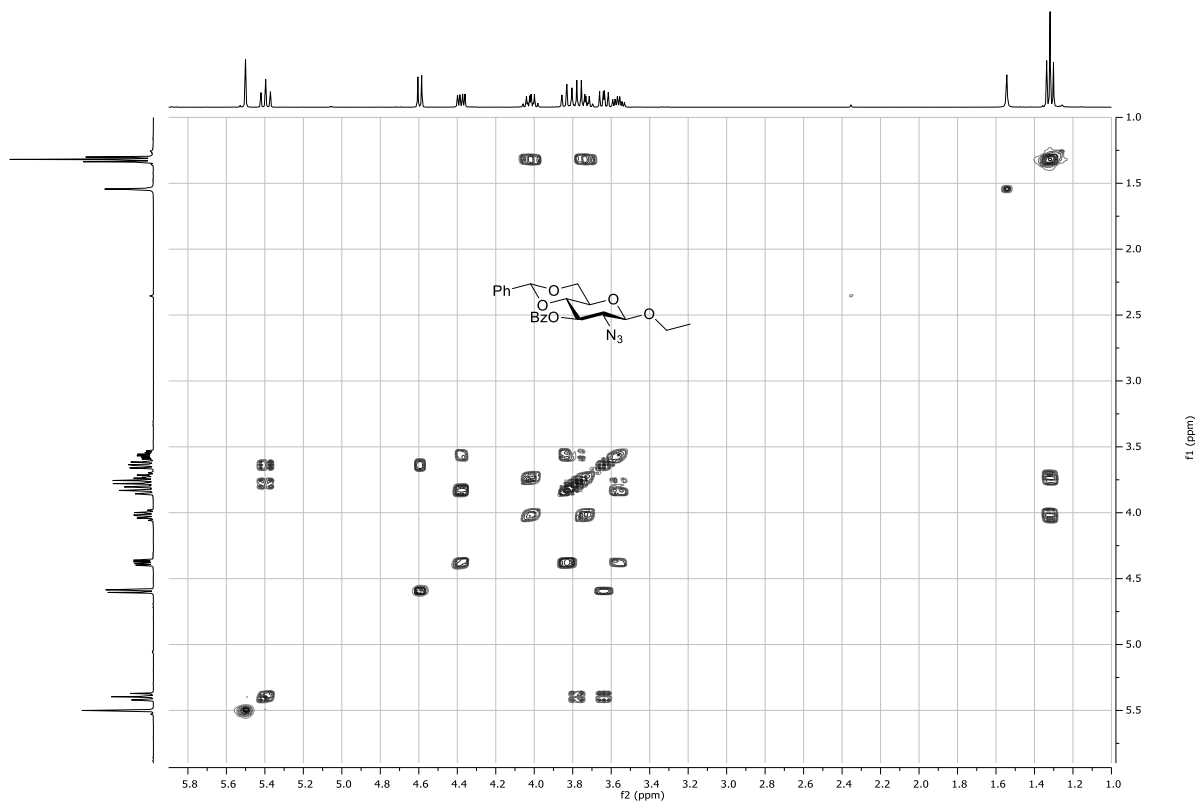

$^1\text{H}$ - $^{13}\text{C}$  HSQC NMR,  $\text{CDCl}_3$

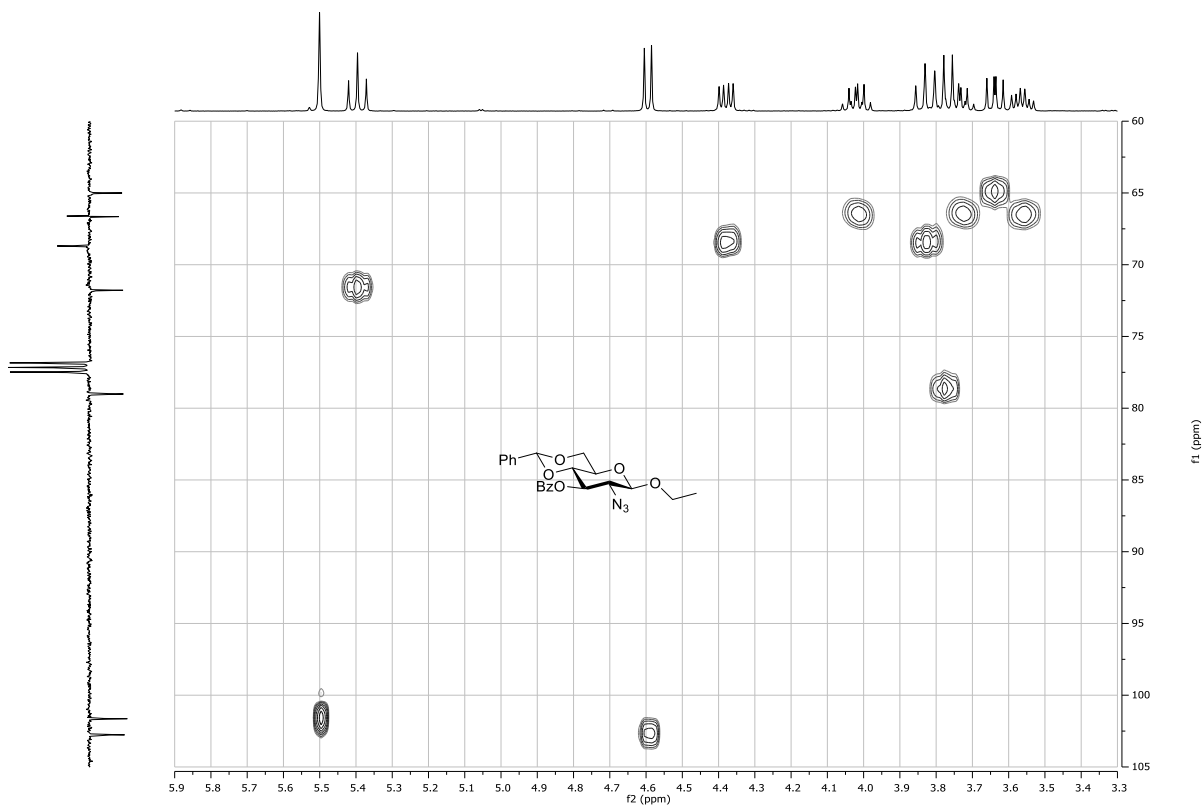

Cyclohexyl 2-azido-3-*O*-benzoyl-4,6-*O*-benzylidene-2-deoxy- $\beta$ -D-glucopyranoside (**4B**).

$^1\text{H}$  NMR, 400 MHz,  $\text{CDCl}_3$

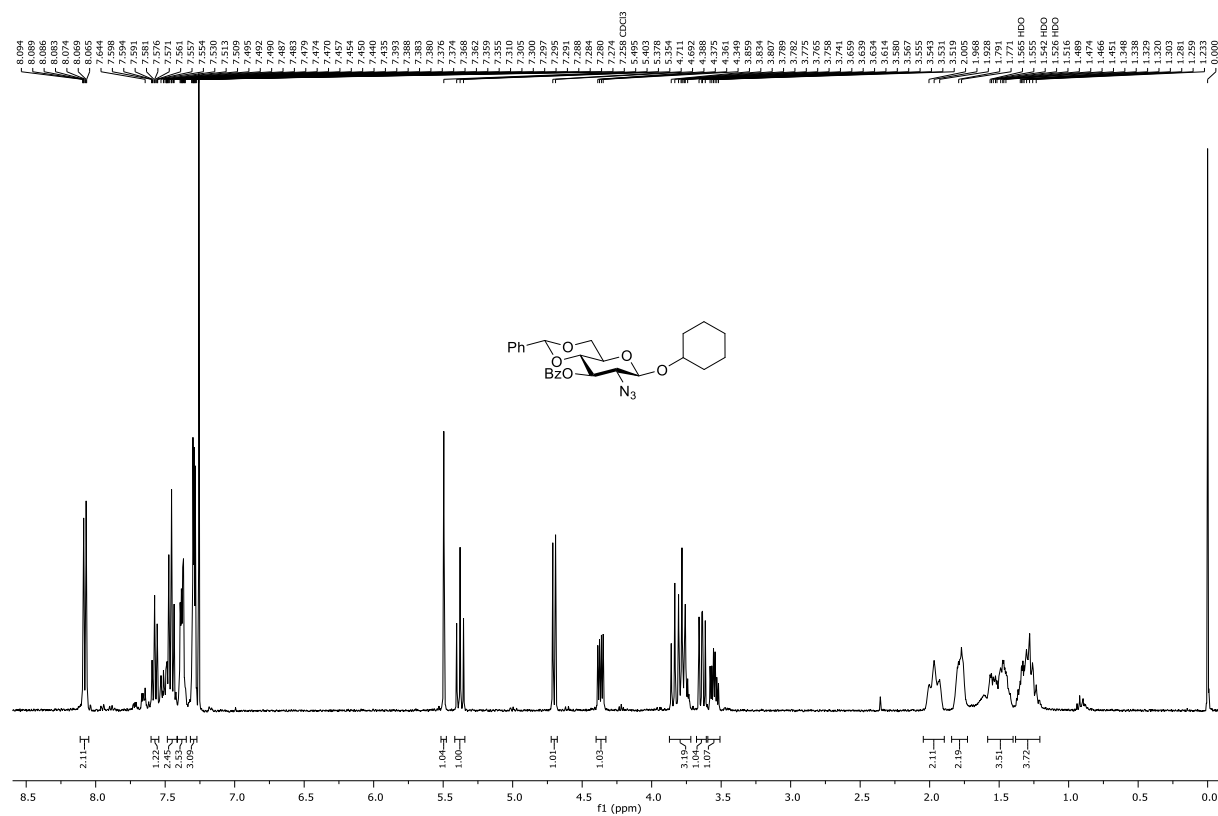

$^{13}\text{C}$ -APT NMR, 101 MHz,  $\text{CDCl}_3$

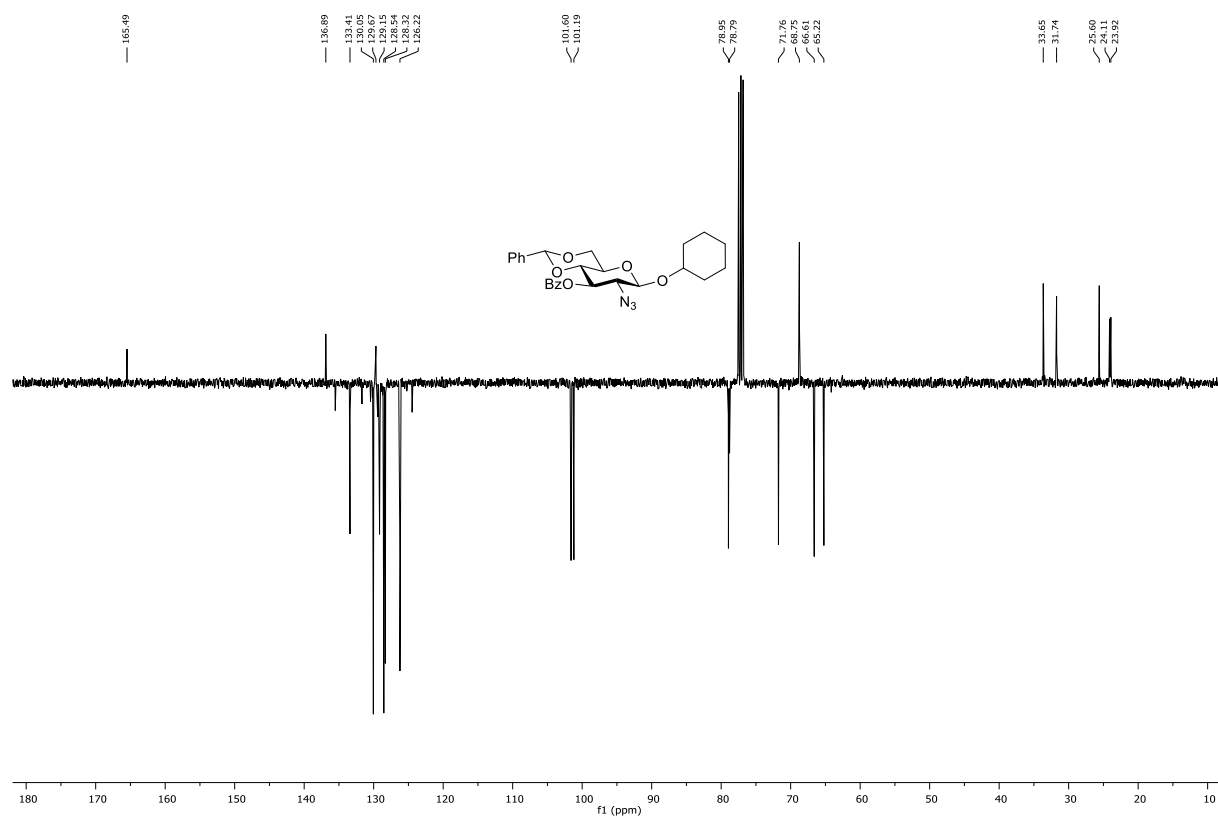

$^1\text{H}$ - $^1\text{H}$  COSY NMR,  $\text{CDCl}_3$

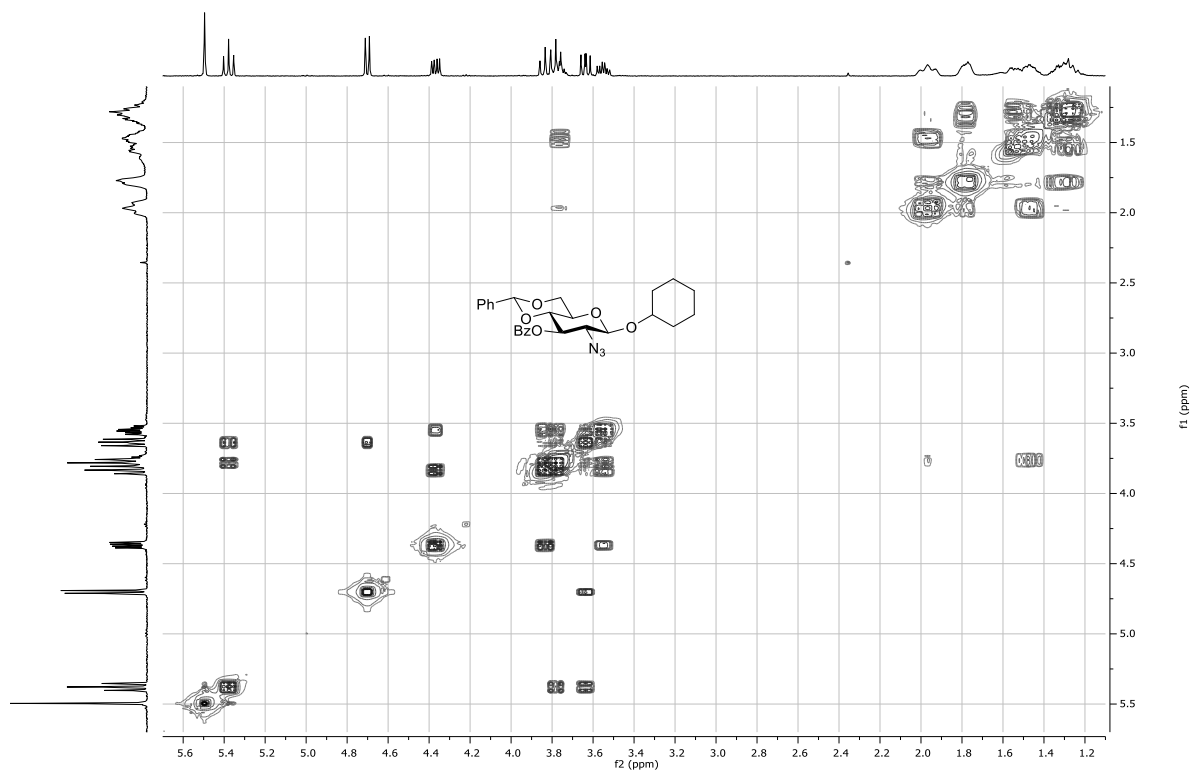

$^1\text{H}$ - $^{13}\text{C}$  HSQC NMR,  $\text{CDCl}_3$

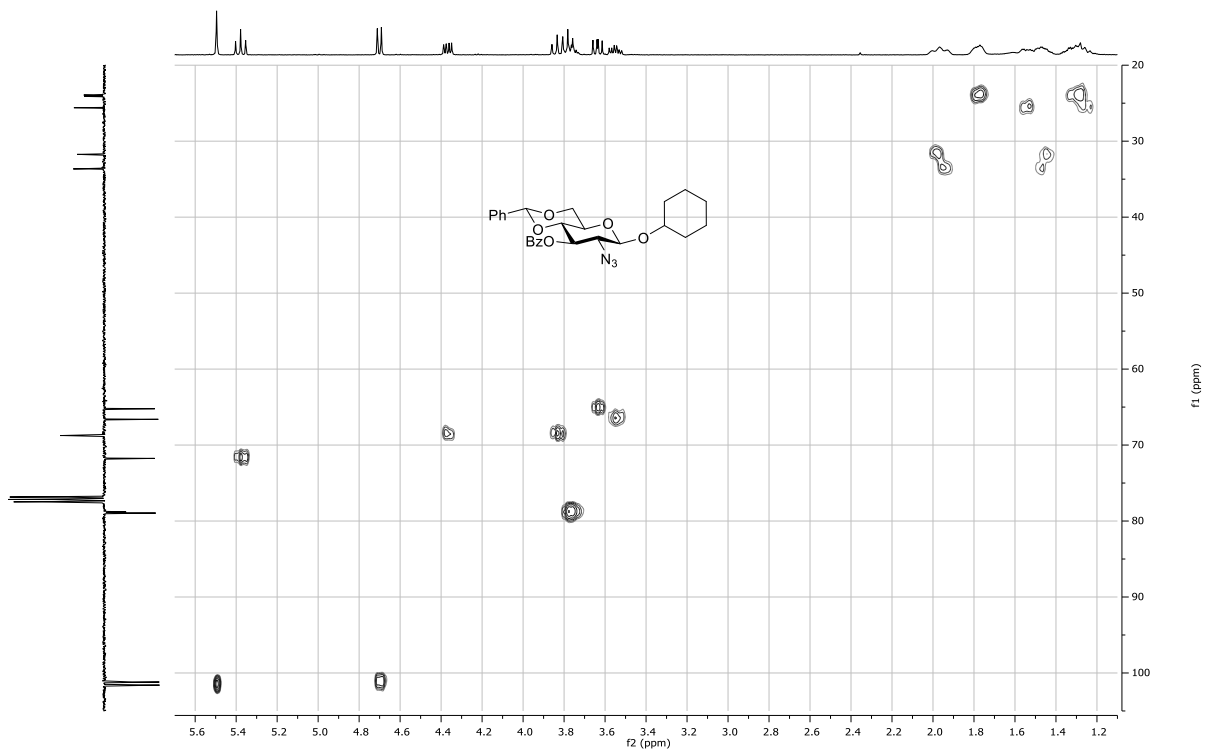

Methyl 6-*O*-(2-azido-3-*O*-benzoyl-4,6-*O*-benzylidene-2-deoxy- $\alpha$ / $\beta$ -D-glucopyranosyl)-2,3,4-tri-*O*-benzyl- $\alpha$ -D-glucopyranoside (4C).

$^1\text{H}$  NMR, 400 MHz,  $\text{CDCl}_3$

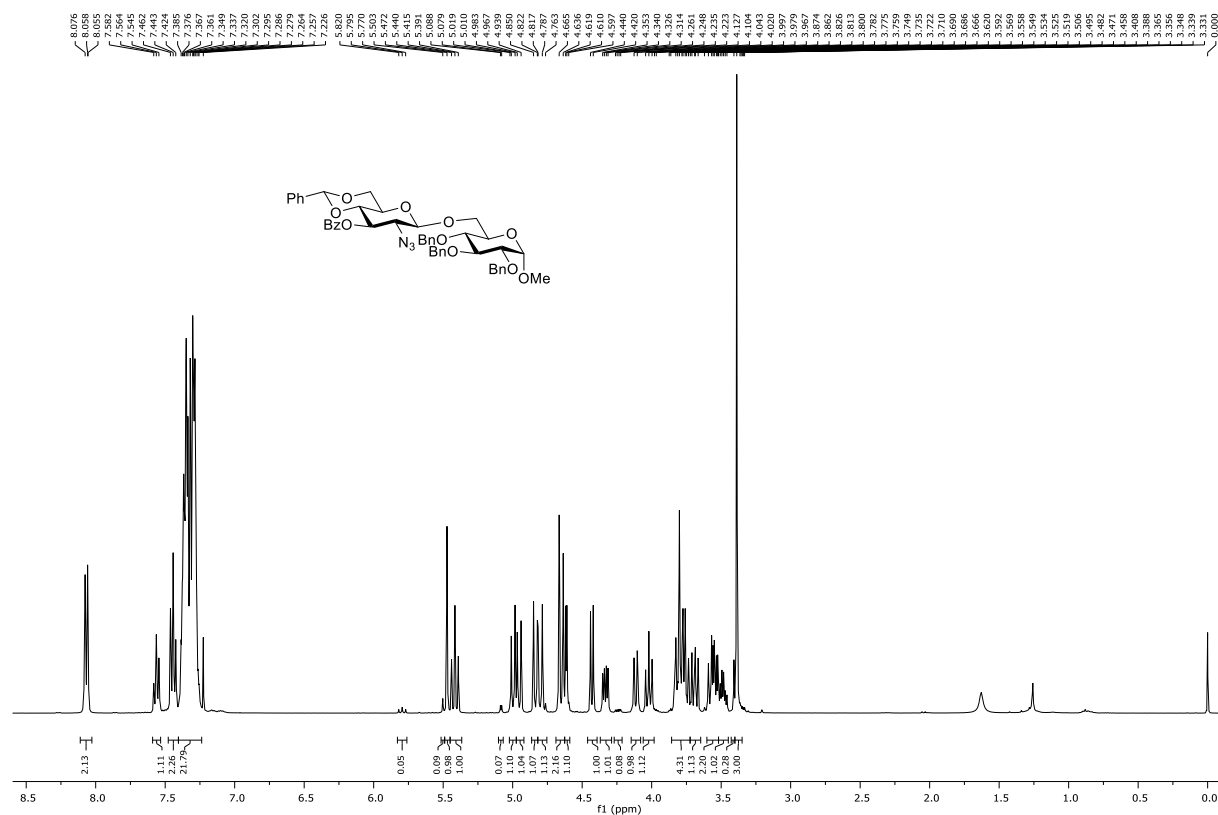

$^{13}\text{C}$ -APT NMR, 101 MHz,  $\text{CDCl}_3$

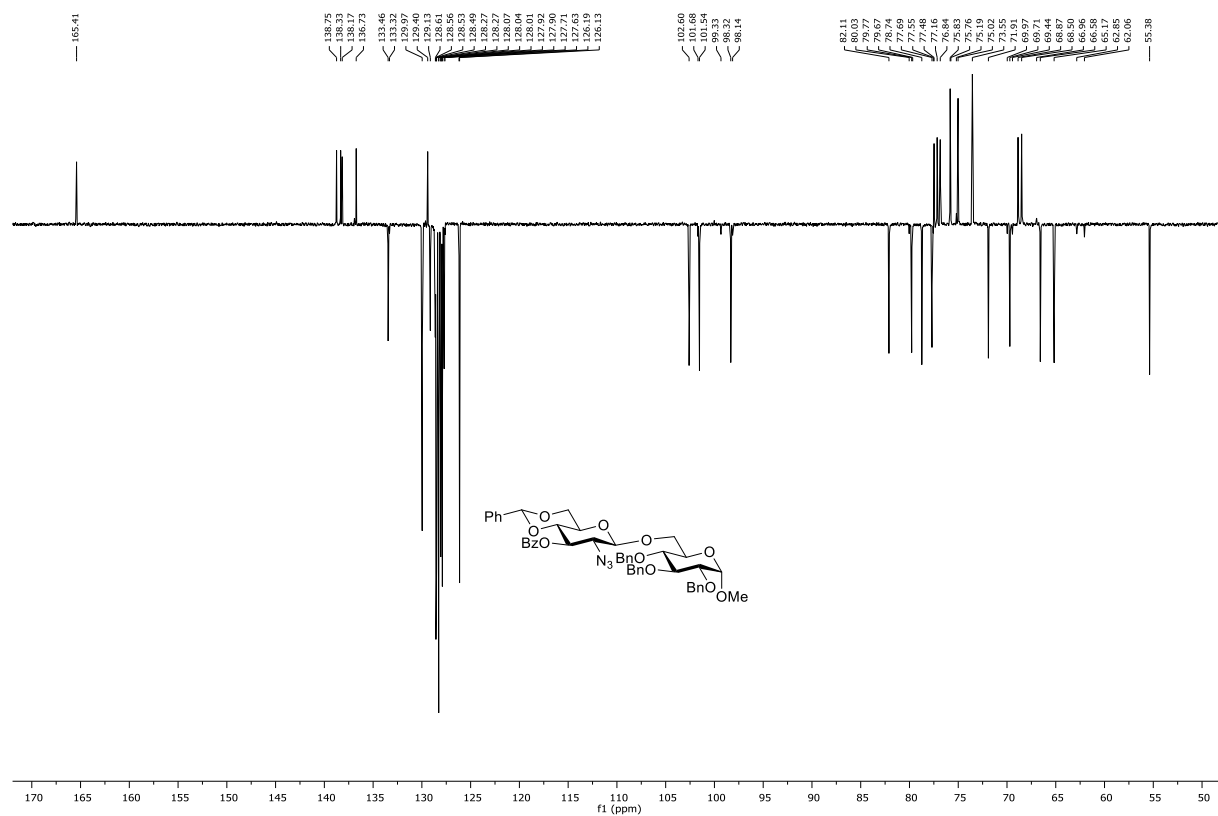

$^1\text{H}$ - $^1\text{H}$  COSY NMR,  $\text{CDCl}_3$

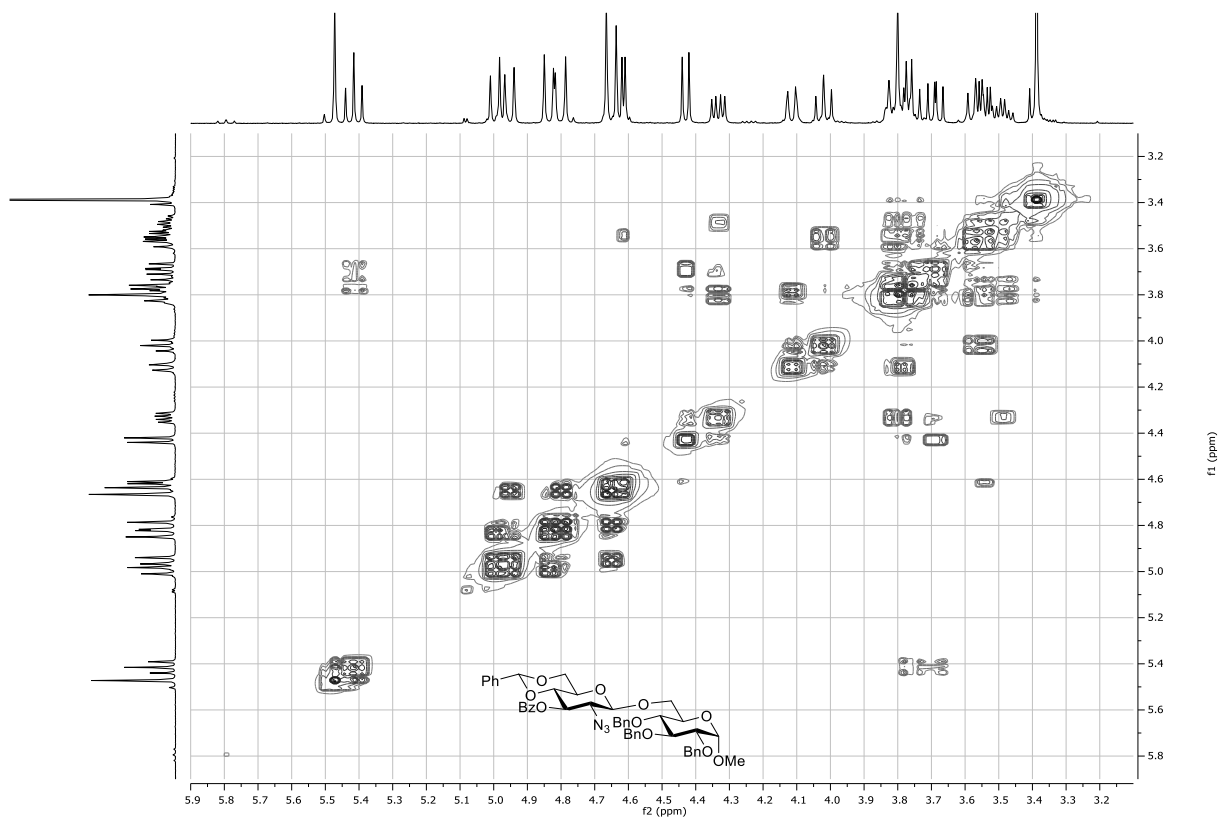

$^1\text{H}$ - $^{13}\text{C}$  HSQC NMR,  $\text{CDCl}_3$

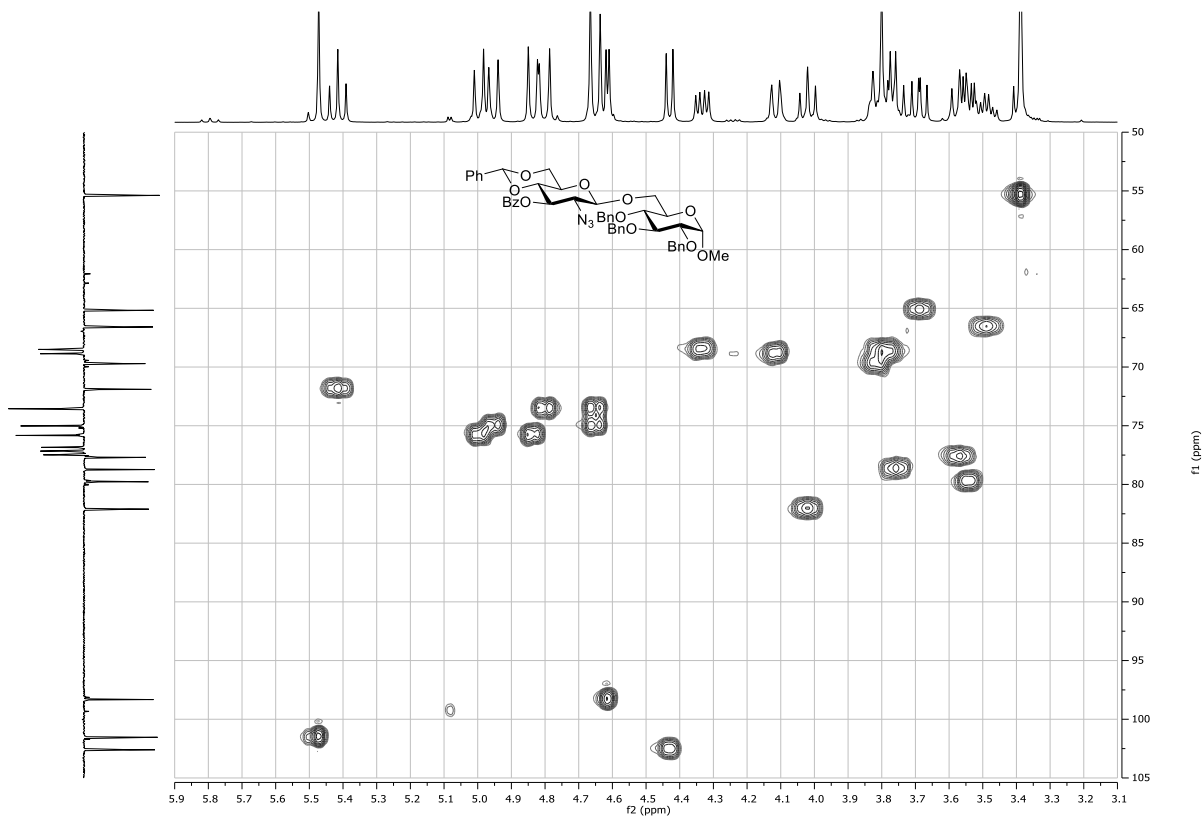

$^1\text{H}$ - $^{13}\text{C}$  HMBC NMR,  $\text{CDCl}_3$

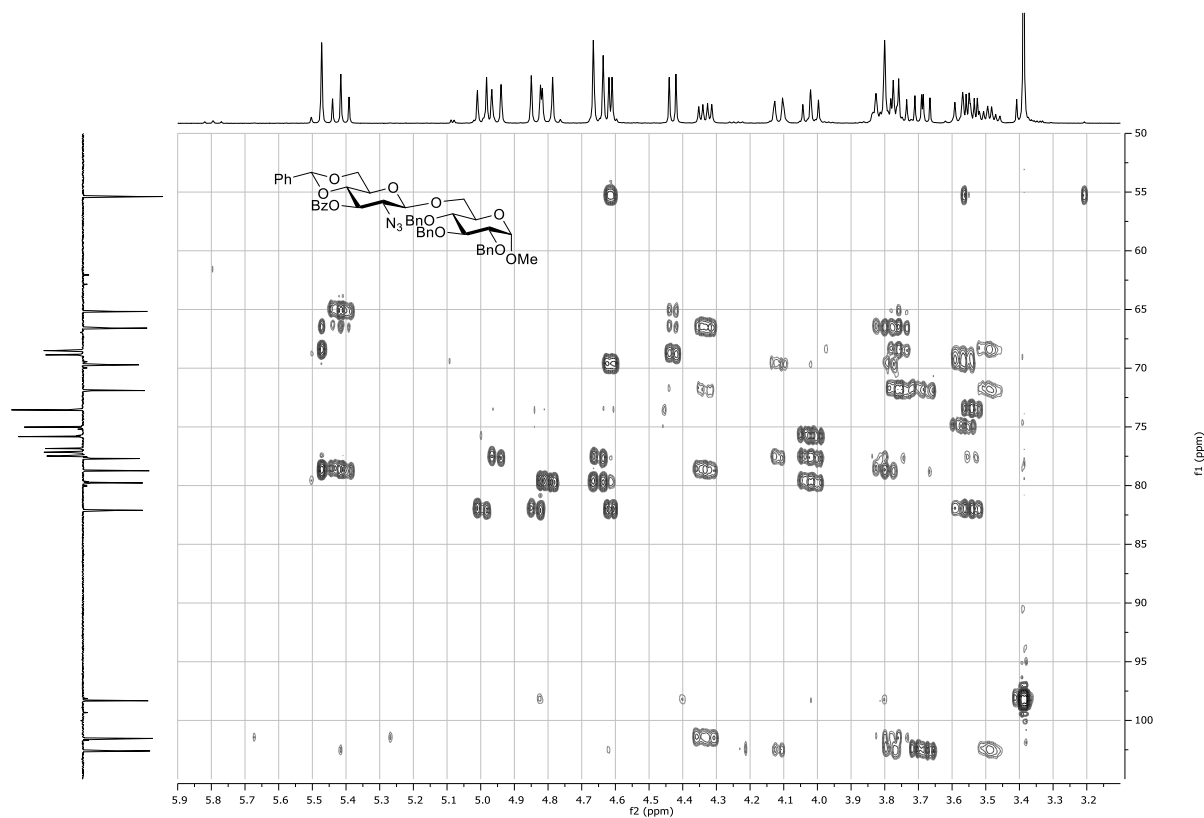

2-Fluoroethyl 2-azido-3-*O*-benzoyl-4,6-*O*-benzylidene-2-deoxy- $\alpha/\beta$ -D-glucopyranoside (**4D**).

$^1\text{H}$  NMR, 400 MHz,  $\text{CDCl}_3$

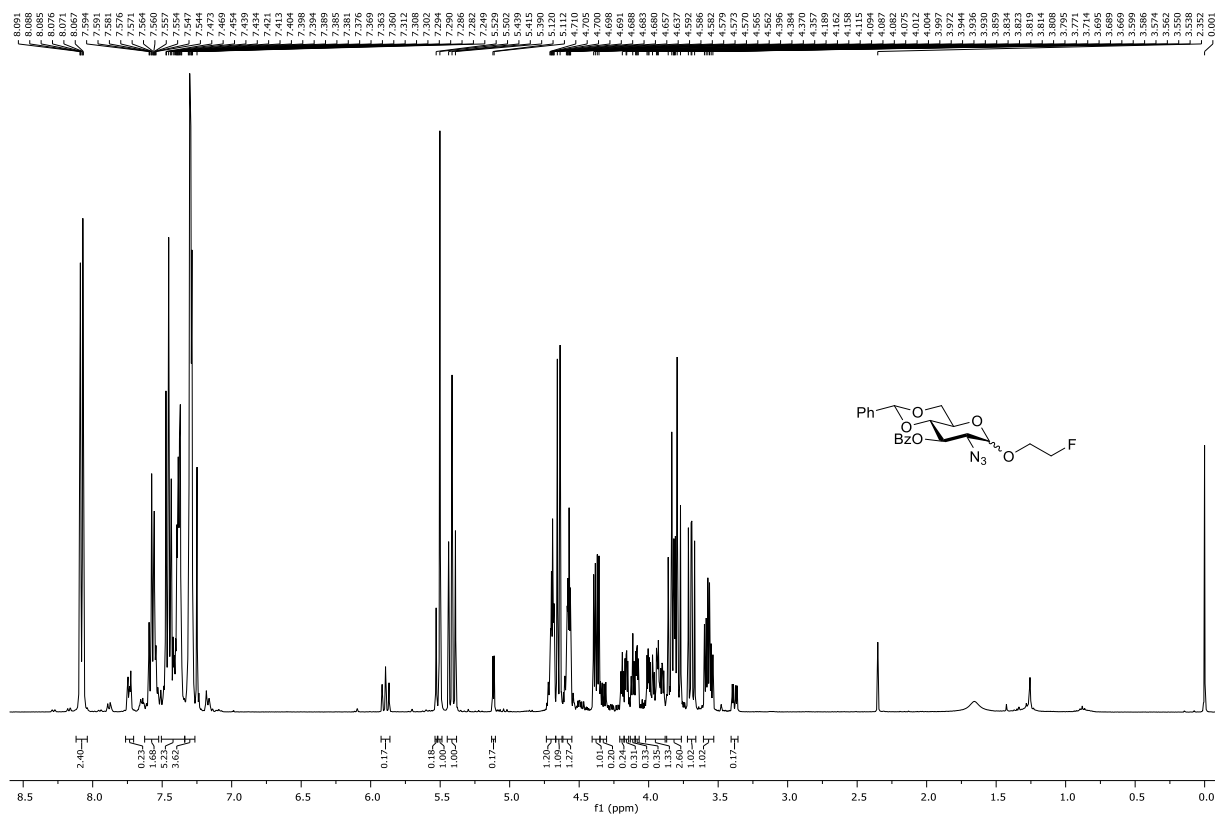

$^{13}\text{C}$ -APT NMR, 101 MHz,  $\text{CDCl}_3$

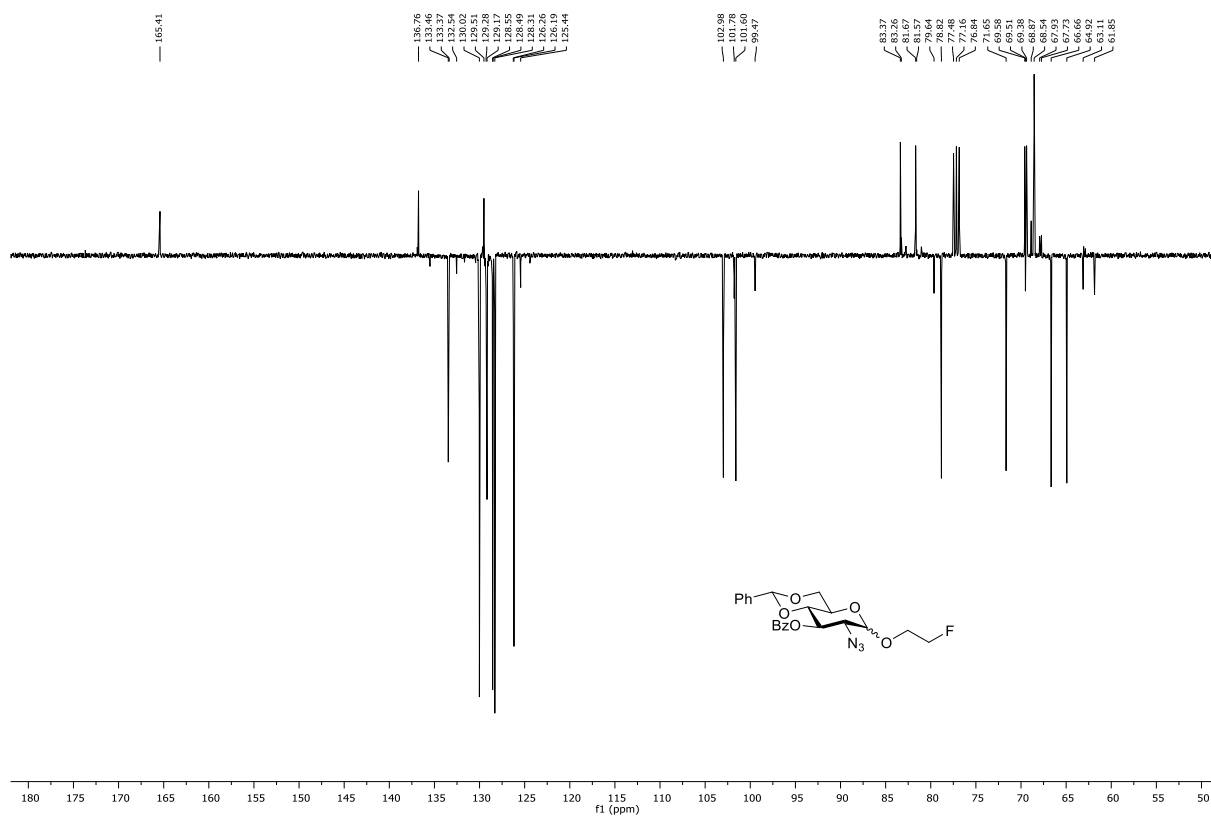

$^1\text{H}$ - $^1\text{H}$  COSY NMR,  $\text{CDCl}_3$

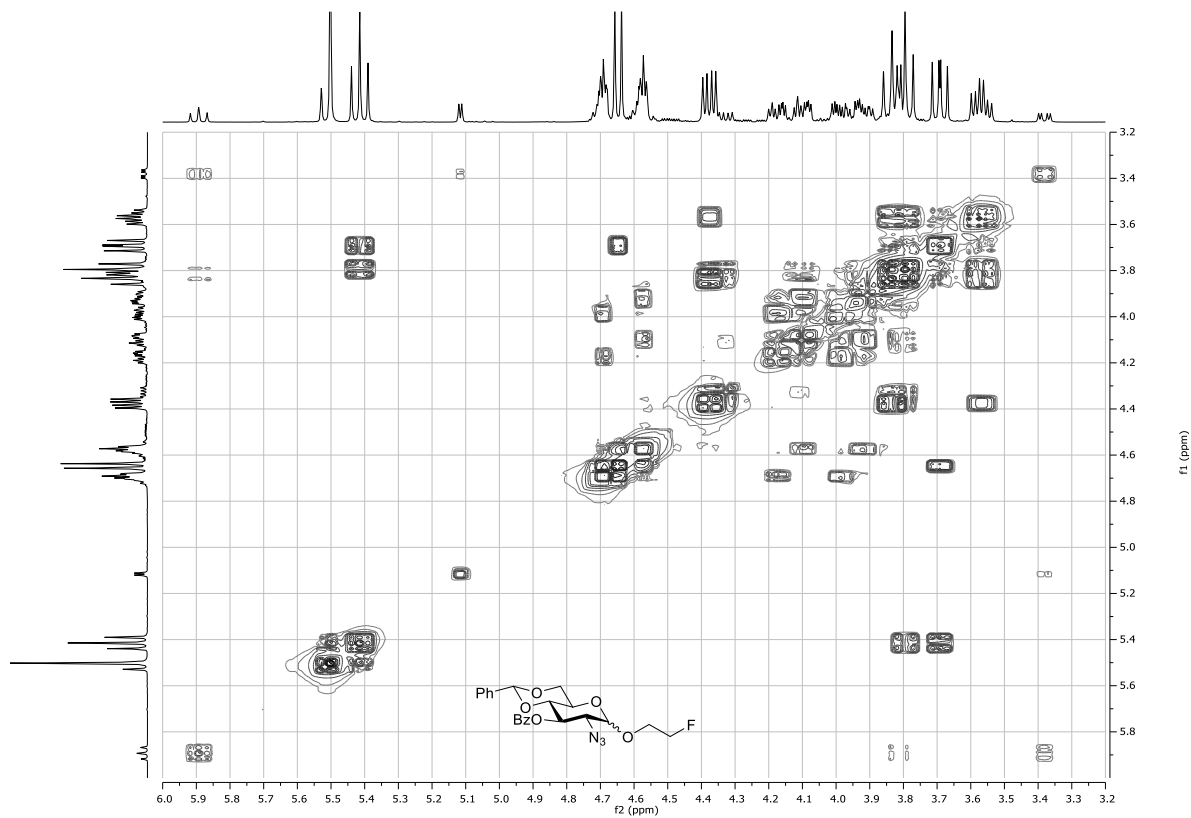

<sup>1</sup>H-<sup>13</sup>C HSQC NMR, CDCl<sub>3</sub>

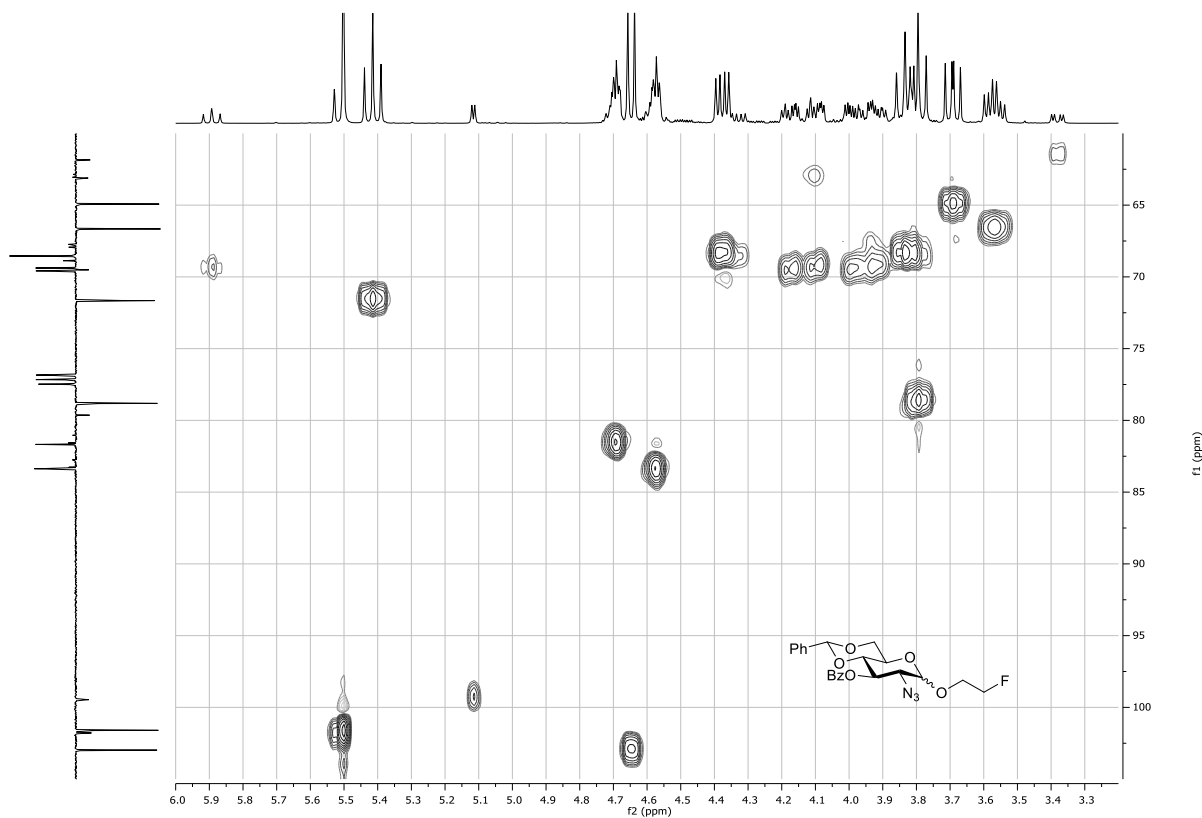

Methyl 4-O-(2-azido-3-O-benzoyl-4,6-O-benzylidene-2-deoxy- $\alpha/\beta$ -D-glucopyranosyl)-2,3,6-tri-O-benzyl- $\alpha$ -D-glucopyranoside (**4E**).

<sup>1</sup>H NMR, 400 MHz, CDCl<sub>3</sub>

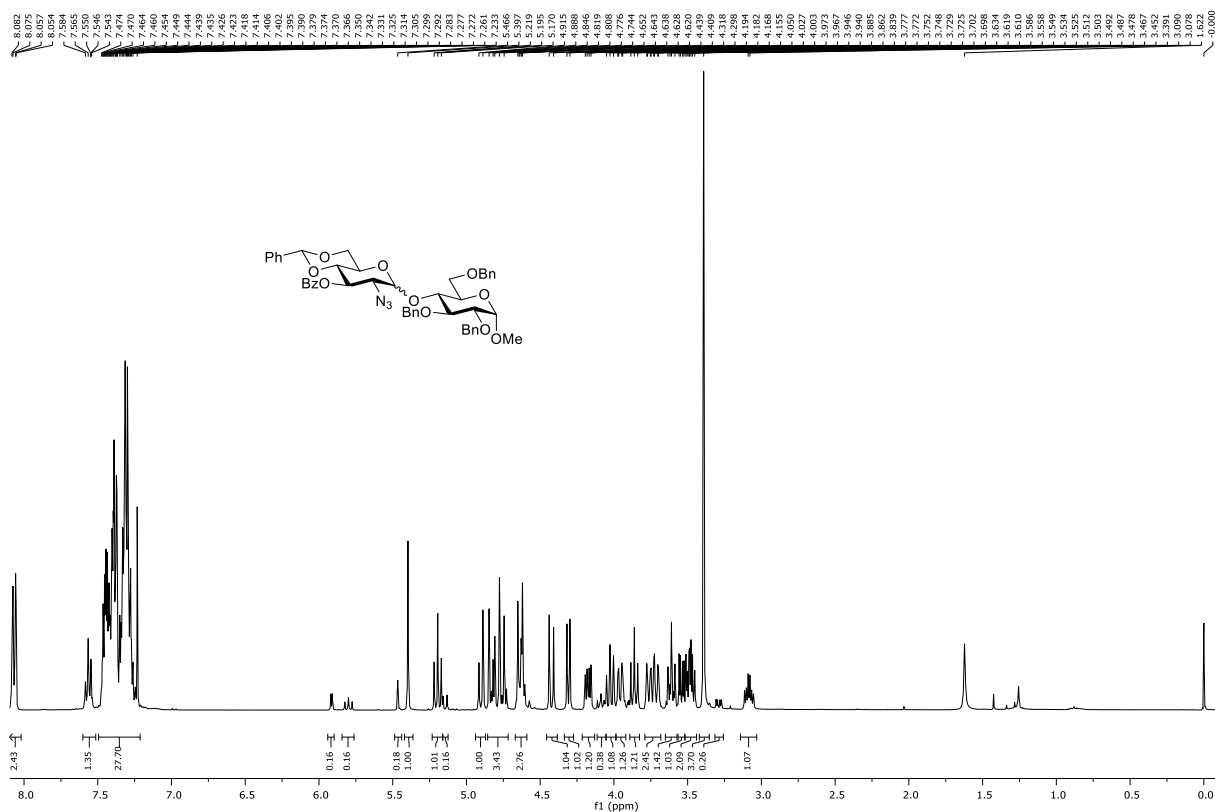



$^{13}\text{C}$ -APT NMR, 101 MHz,  $\text{CDCl}_3$

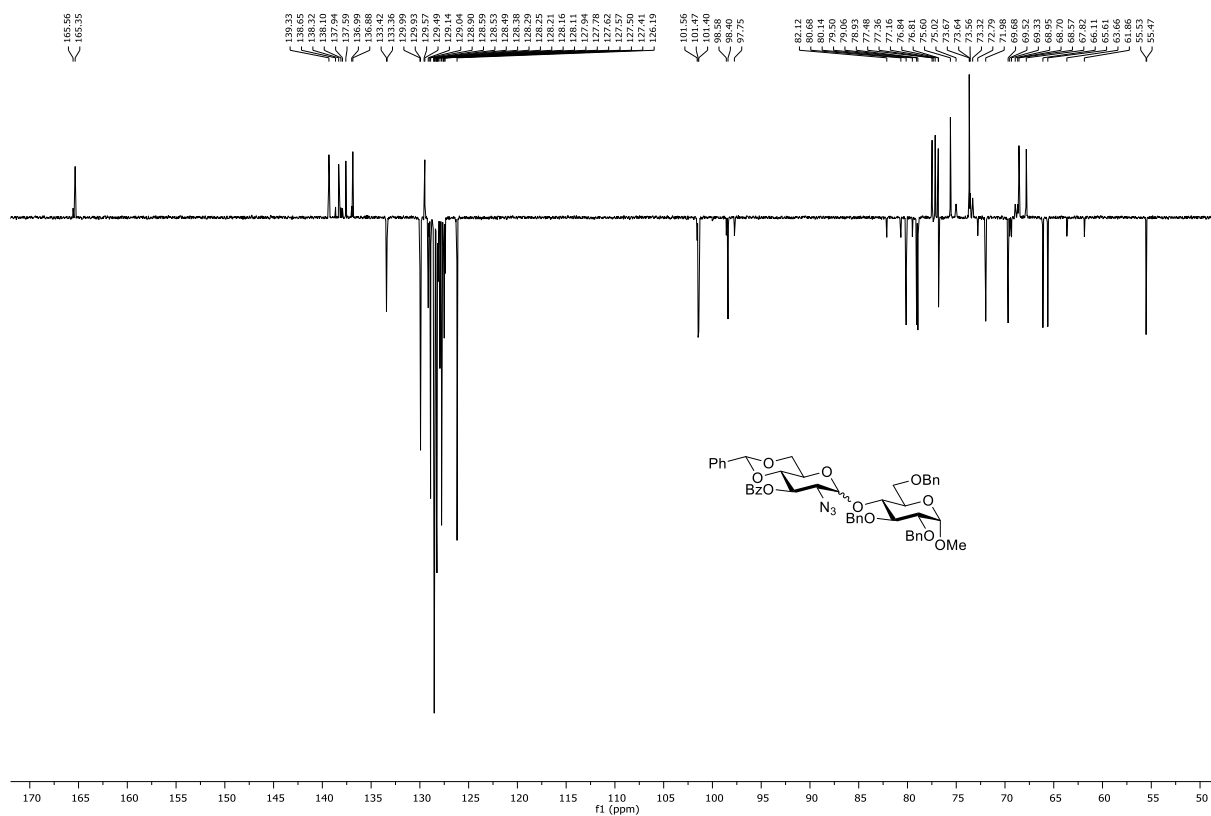

$^1\text{H}$ - $^1\text{H}$  COSY NMR,  $\text{CDCl}_3$

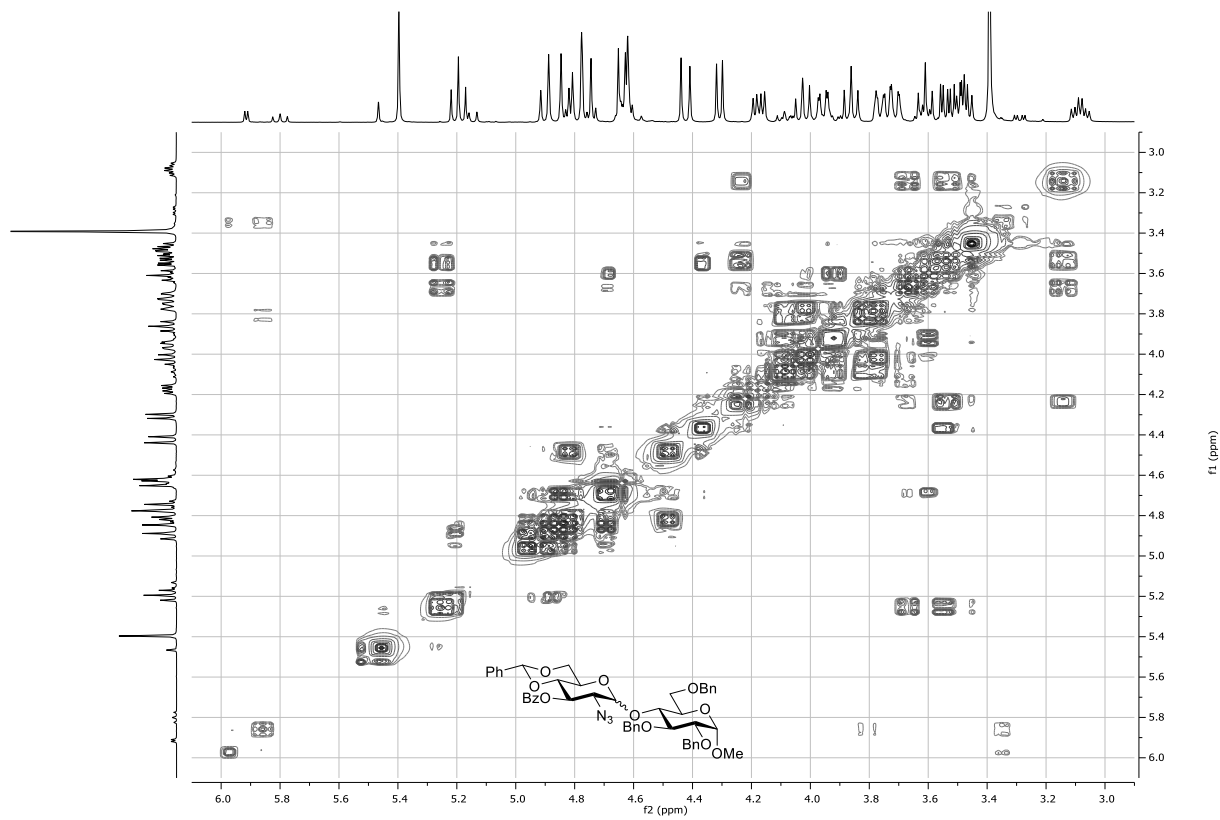

$^1\text{H}$ - $^{13}\text{C}$  HSQC NMR,  $\text{CDCl}_3$

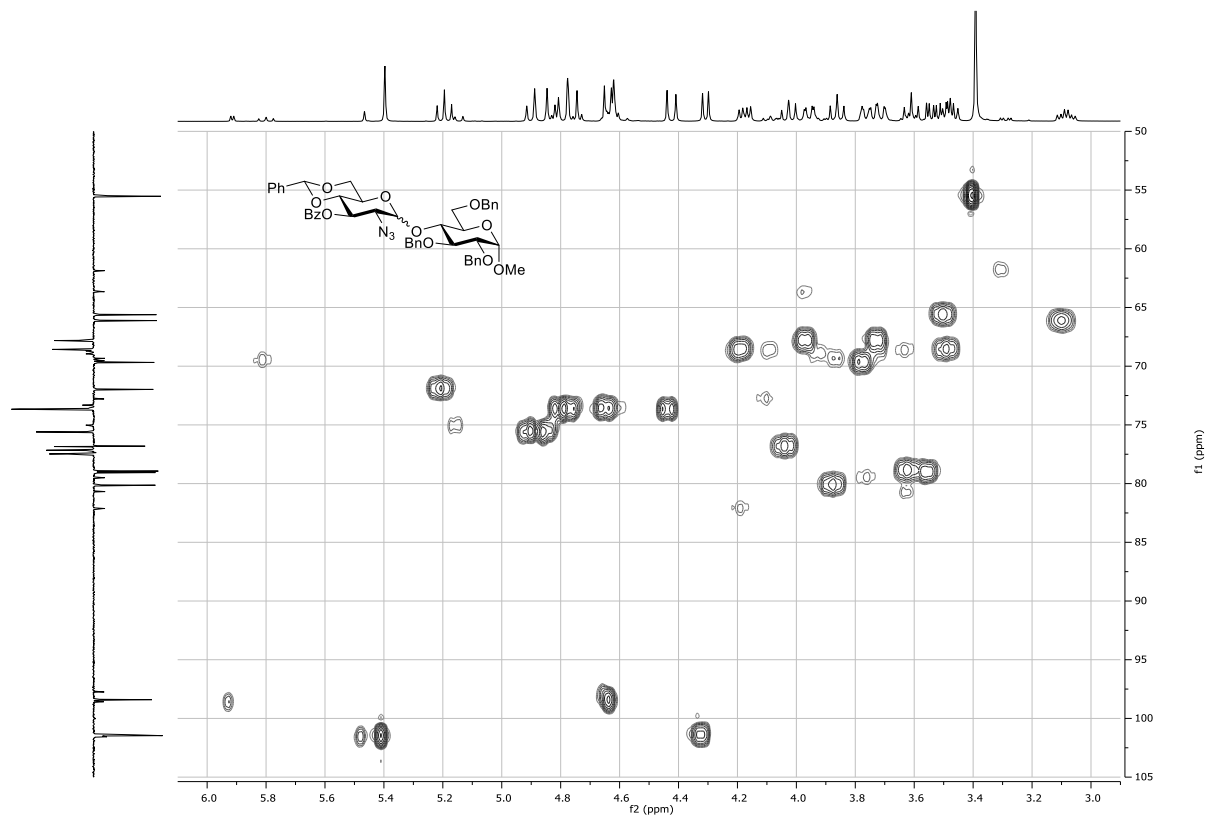

$^1\text{H}$ - $^{13}\text{C}$  HMBC NMR,  $\text{CDCl}_3$

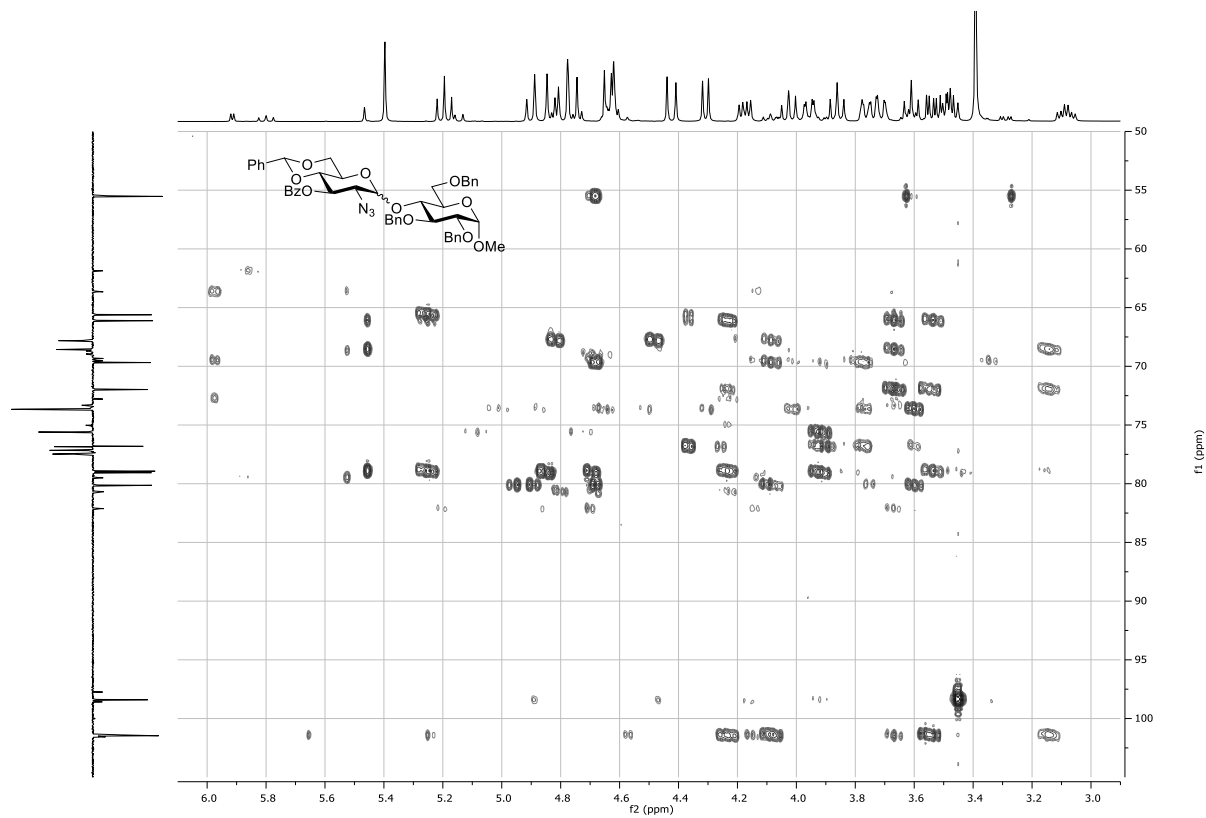



$^1\text{H}$ - $^1\text{H}$  COSY NMR,  $\text{CDCl}_3$

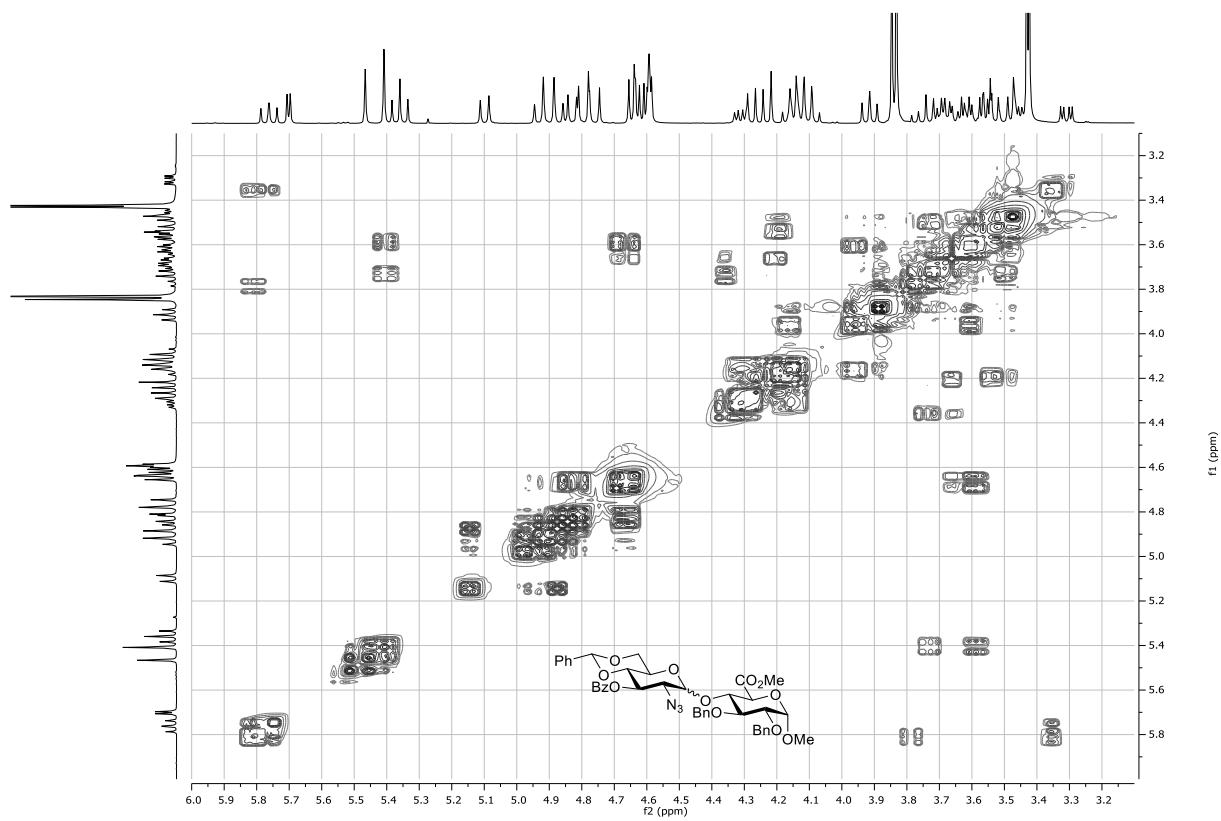

$^1\text{H}$ - $^{13}\text{C}$  HSQC NMR,  $\text{CDCl}_3$

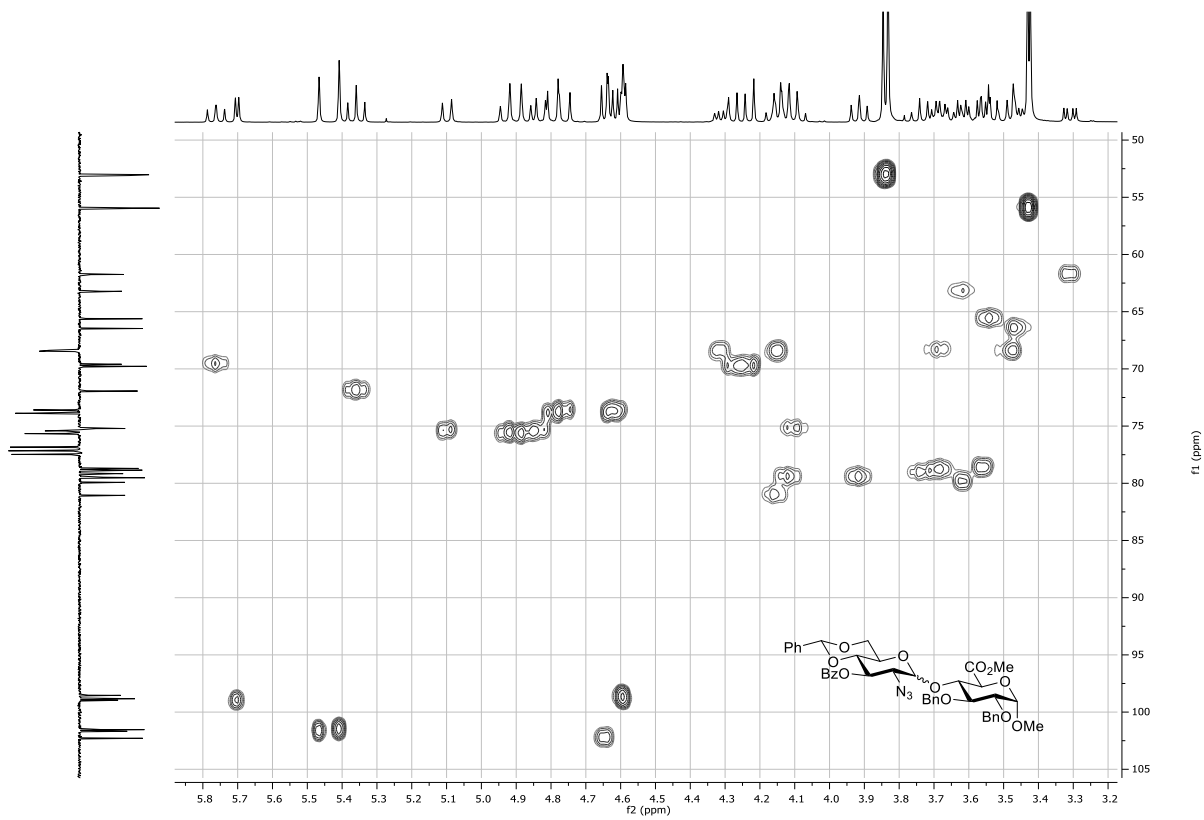

$^1\text{H}$ - $^{13}\text{C}$  HMBC NMR,  $\text{CDCl}_3$

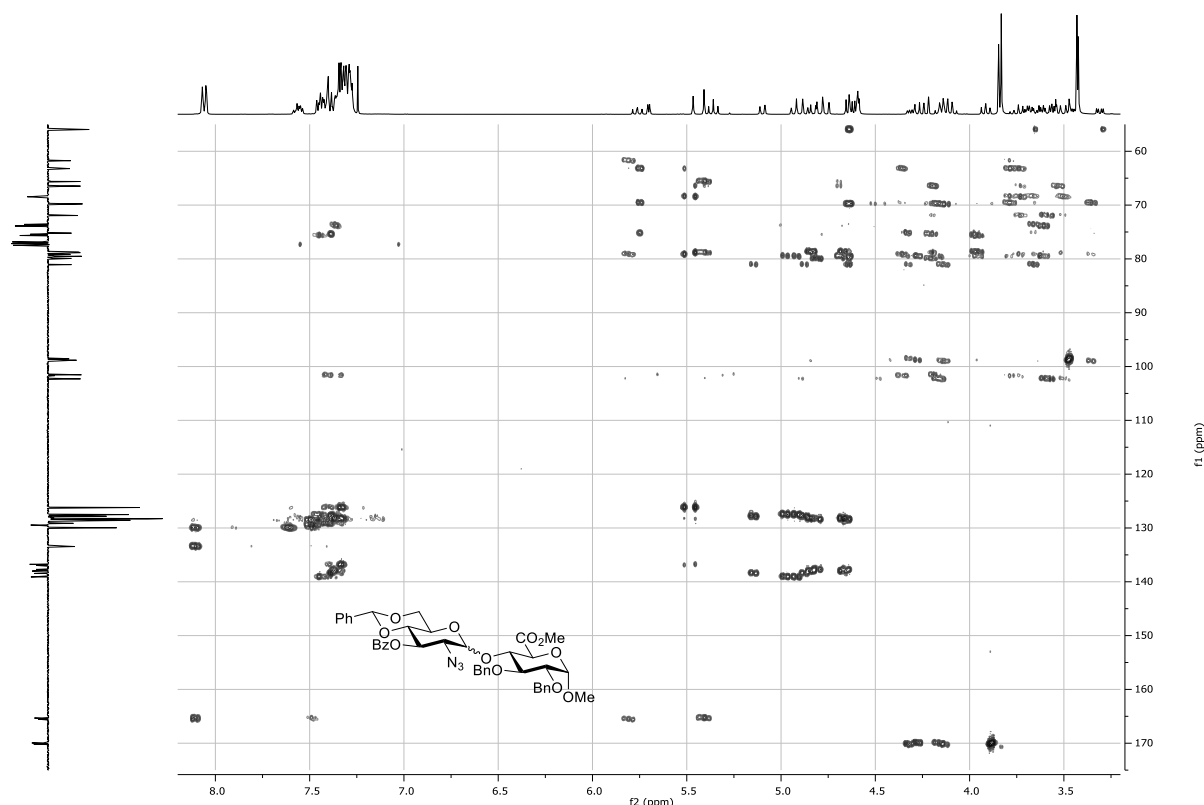

2,2-Difluoroethyl 2-azido-3-O-benzoyl-4,6-O-benzylidene-2-deoxy- $\alpha/\beta$ -D-glucopyranoside (4G).

$^1\text{H}$  NMR, 300 MHz,  $\text{CDCl}_3$

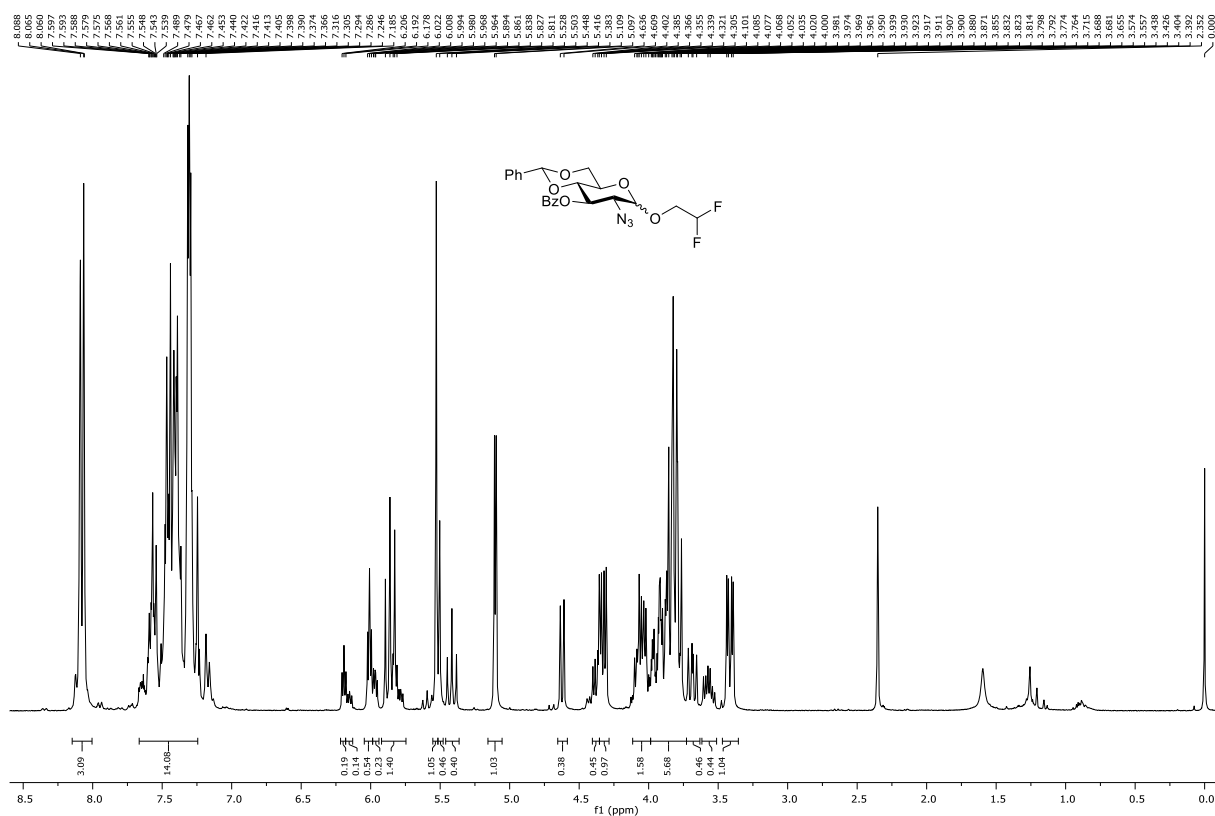

$^{13}\text{C}$ -APT NMR, 101 MHz,  $\text{CDCl}_3$

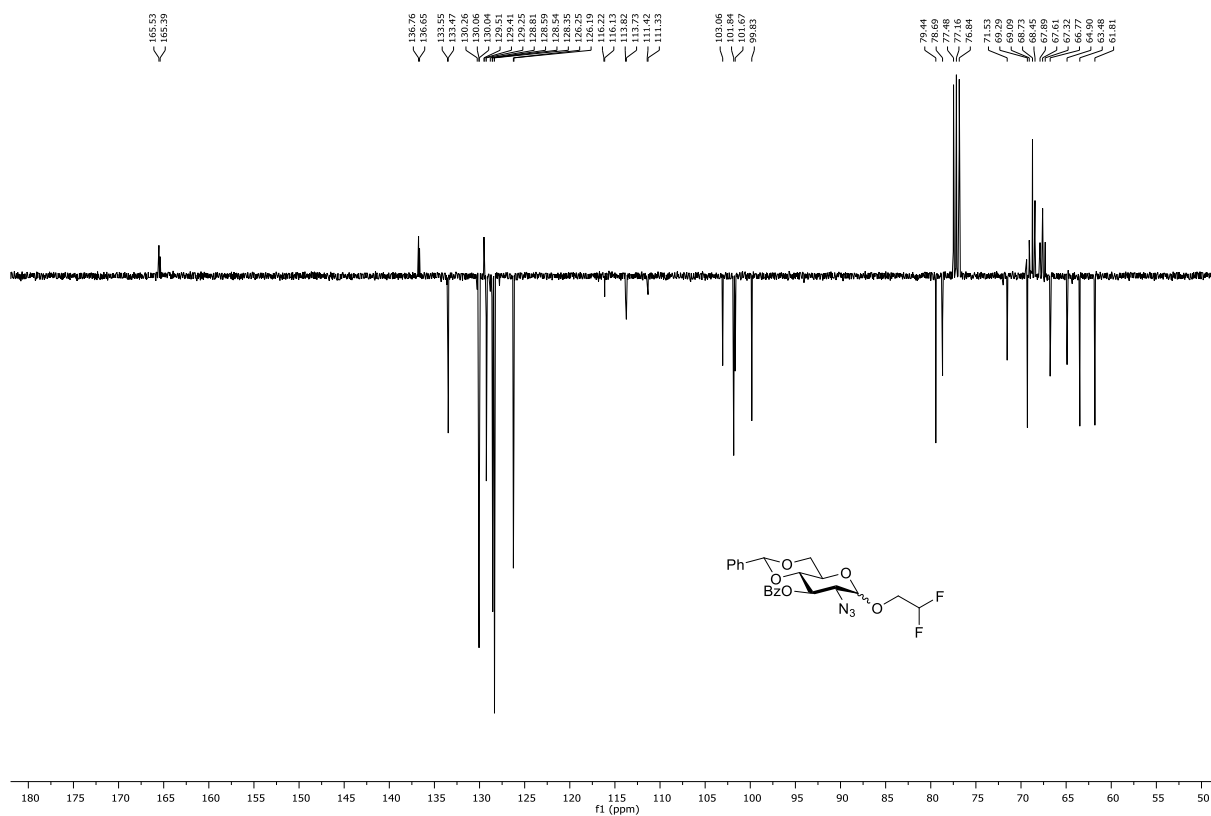

$^1\text{H}$ - $^1\text{H}$  COSY NMR,  $\text{CDCl}_3$

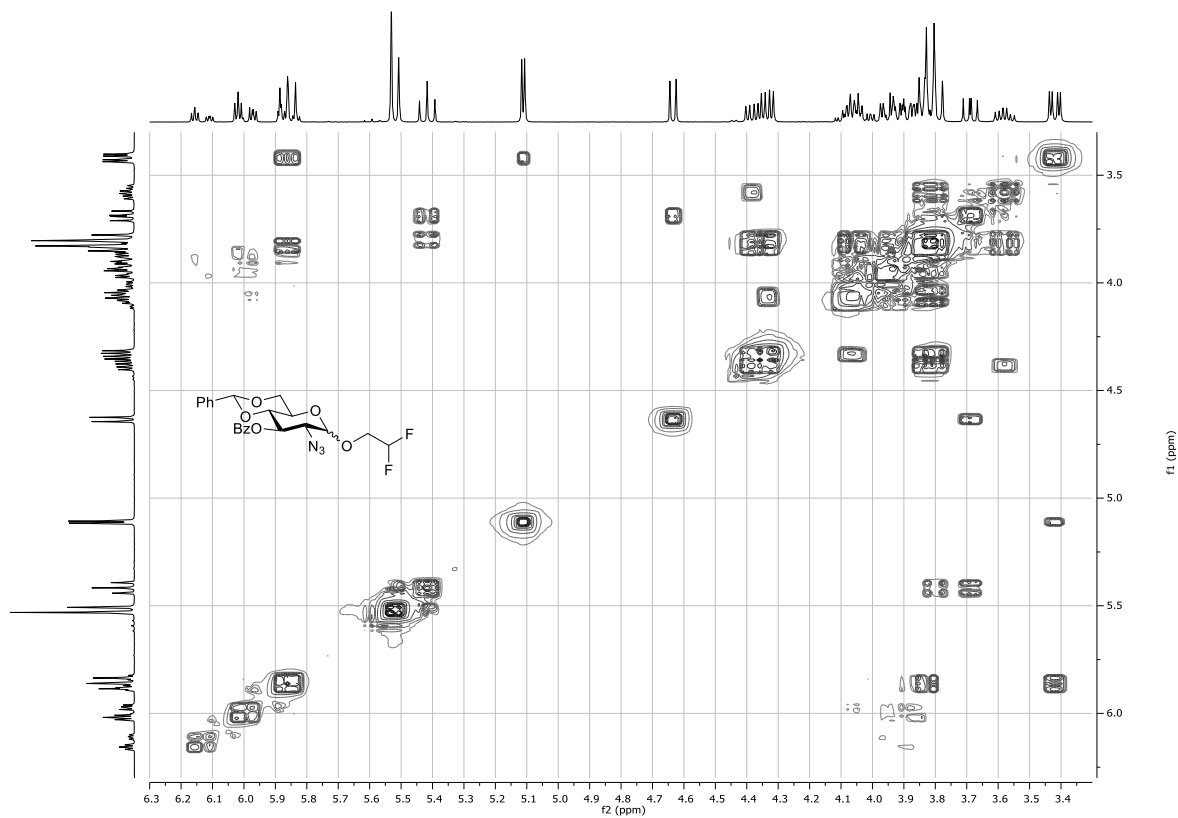

$^1\text{H}$ - $^{13}\text{C}$  HSQC NMR,  $\text{CDCl}_3$

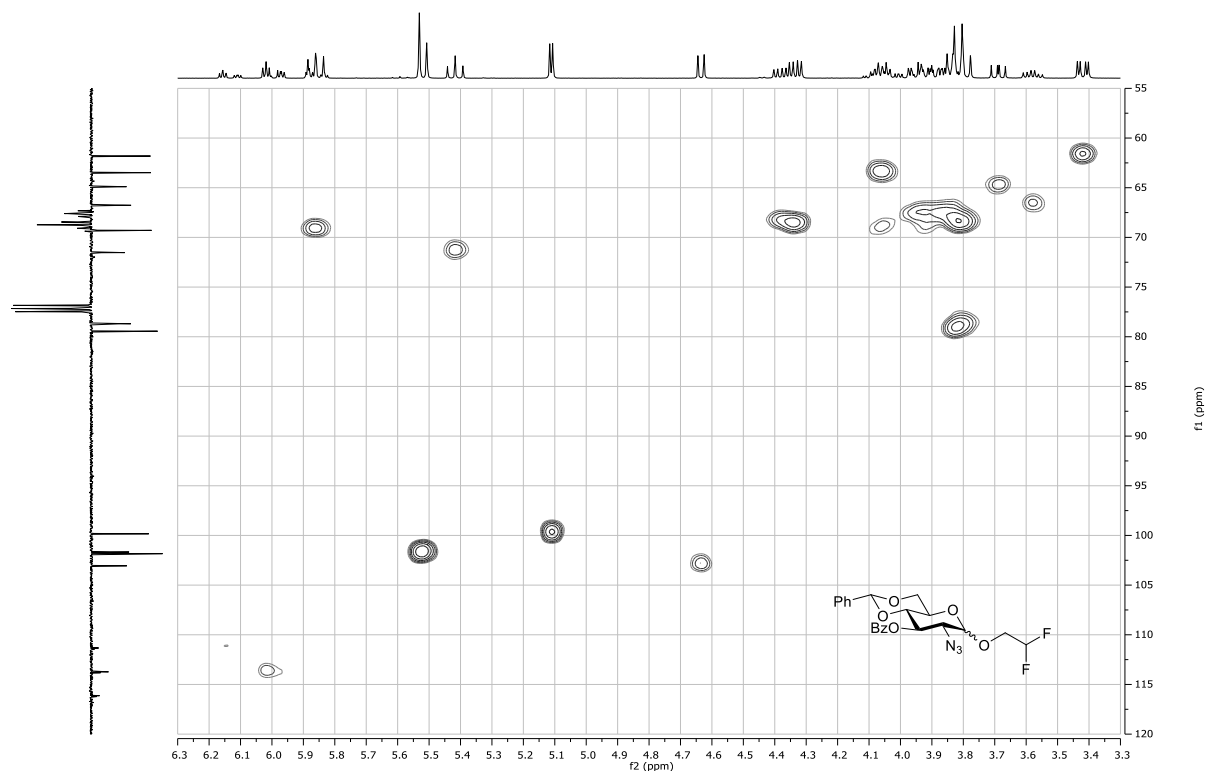

Methyl 4-*O*-(2-azido-3-*O*-benzoyl-4,6-*O*-benzylidene-2-deoxy- $\alpha/\beta$ -D-glucopyranosyl)-2,3,6-tri-*O*-benzyl- $\beta$ -D-galactopyranoside (**4H**).

$^1\text{H}$  NMR, 400 MHz,  $\text{CDCl}_3$

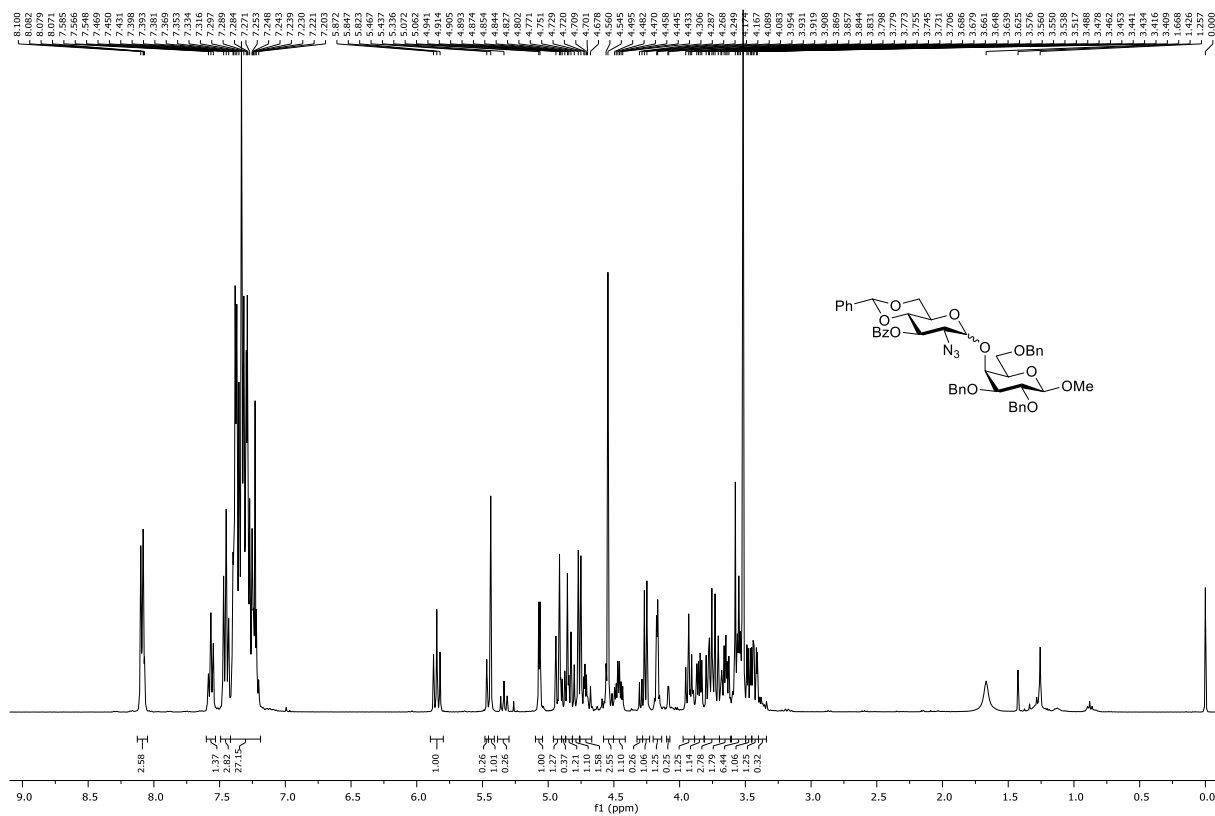

<sup>13</sup>C-APT NMR, 101 MHz, CDCl<sub>3</sub>

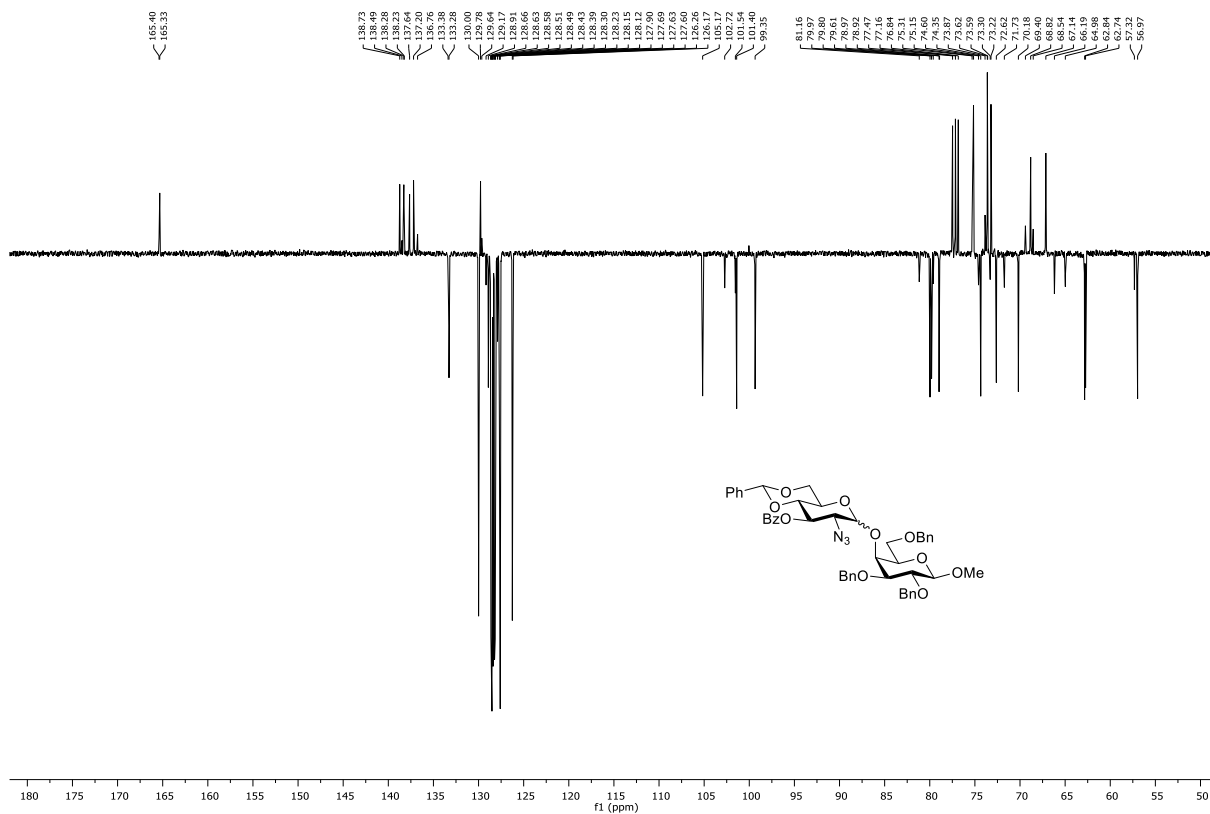

<sup>1</sup>H-<sup>1</sup>H COSY NMR, CDCl<sub>3</sub>

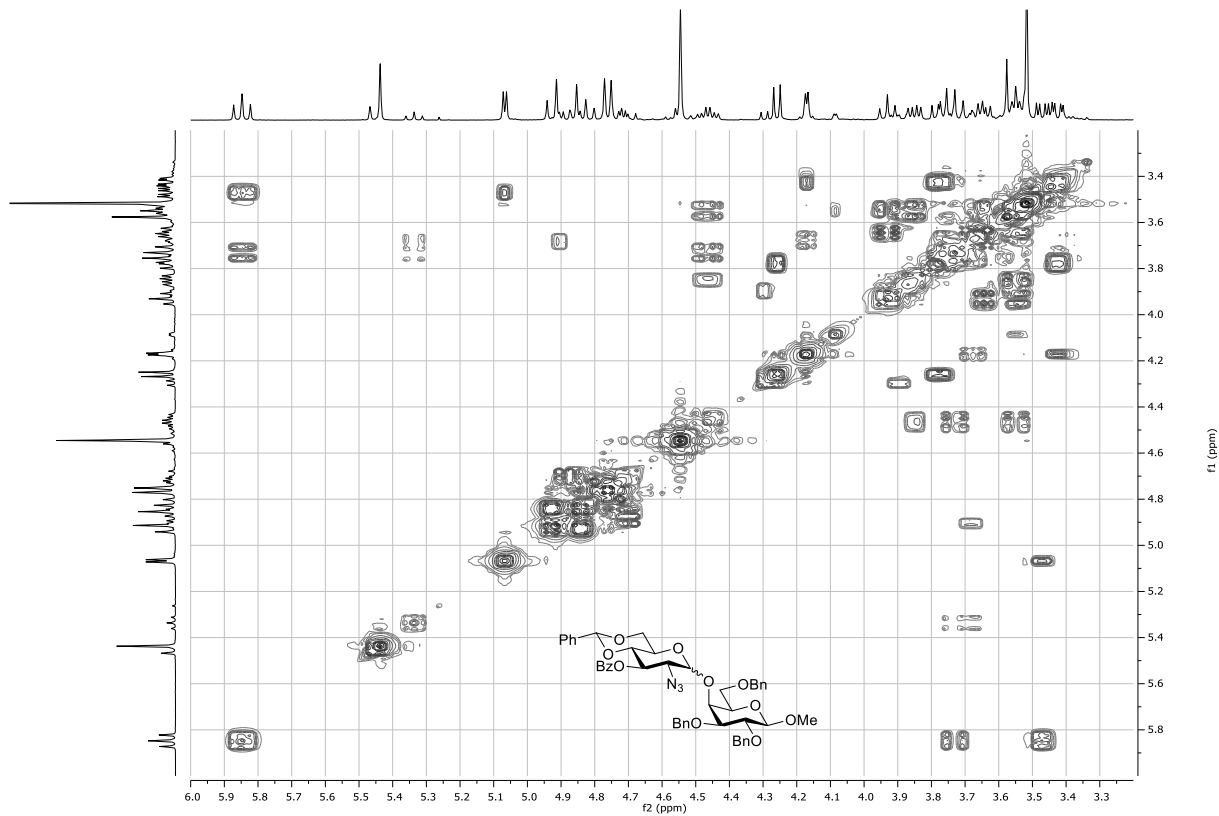



$^1\text{H}$ - $^{13}\text{C}$  HSQC NMR,  $\text{CDCl}_3$

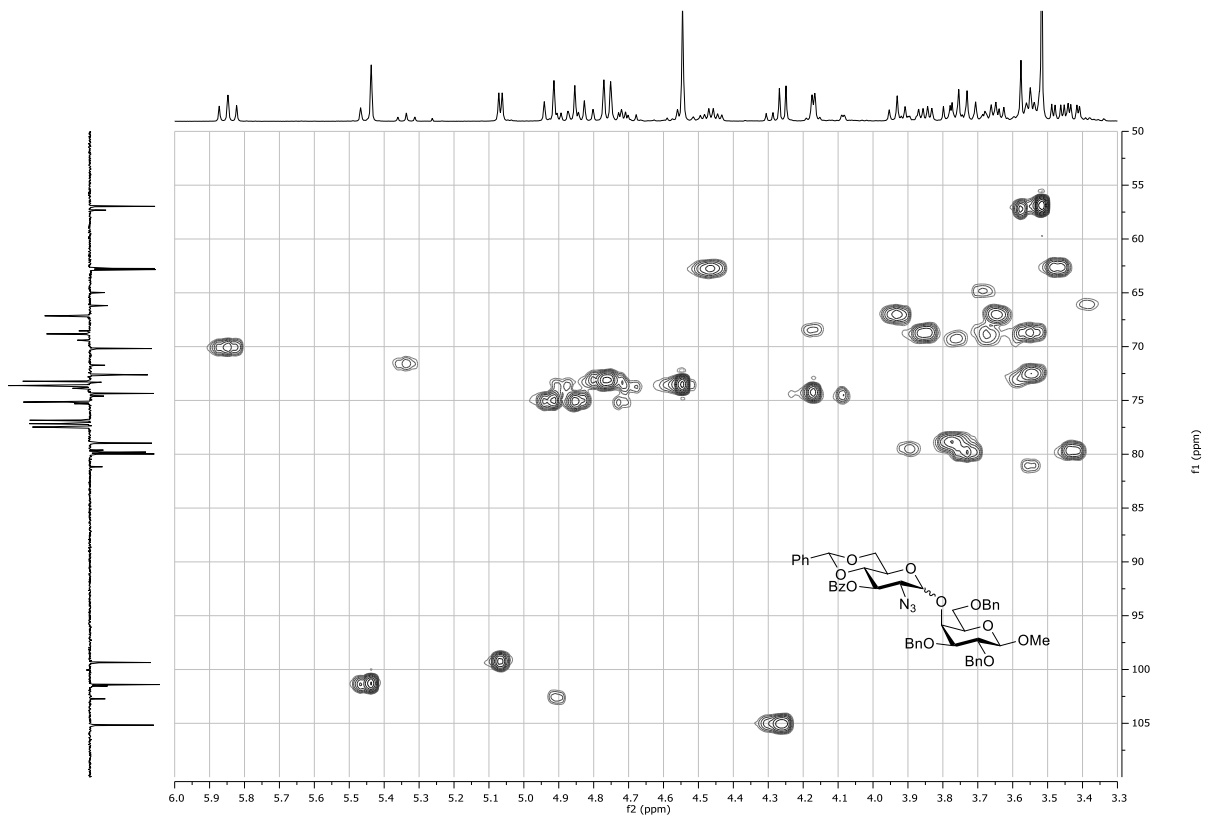

$^1\text{H}$ - $^{13}\text{C}$  HMBC NMR,  $\text{CDCl}_3$

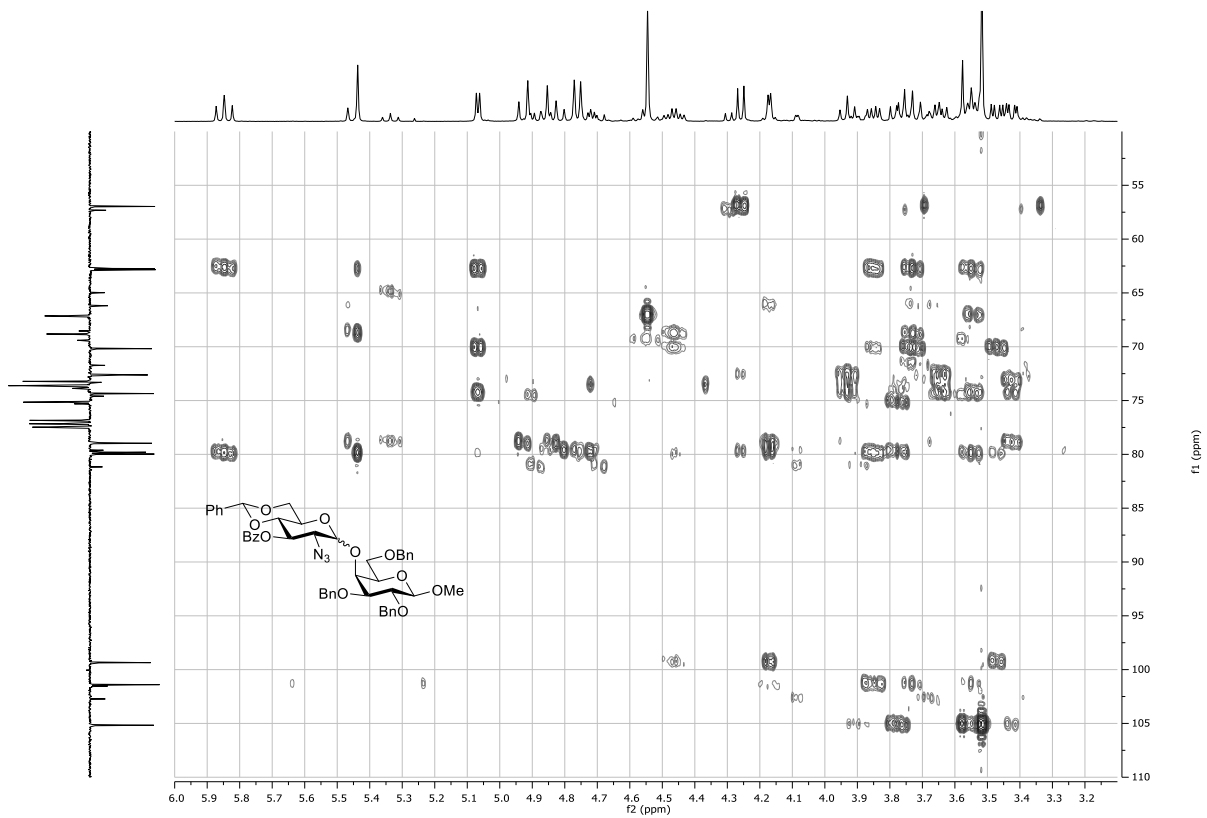

Methyl 2-*O*-(2-azido-3-*O*-benzoyl-4,6-*O*-benzylidene-2-deoxy- $\alpha$ / $\beta$ -D-glucopyranosyl)-3-*O*-benzyl-4,6-*O*-benzylidene- $\alpha$ -D-mannopyranoside (**4I**).

$^1\text{H}$  NMR, 400 MHz,  $\text{CDCl}_3$

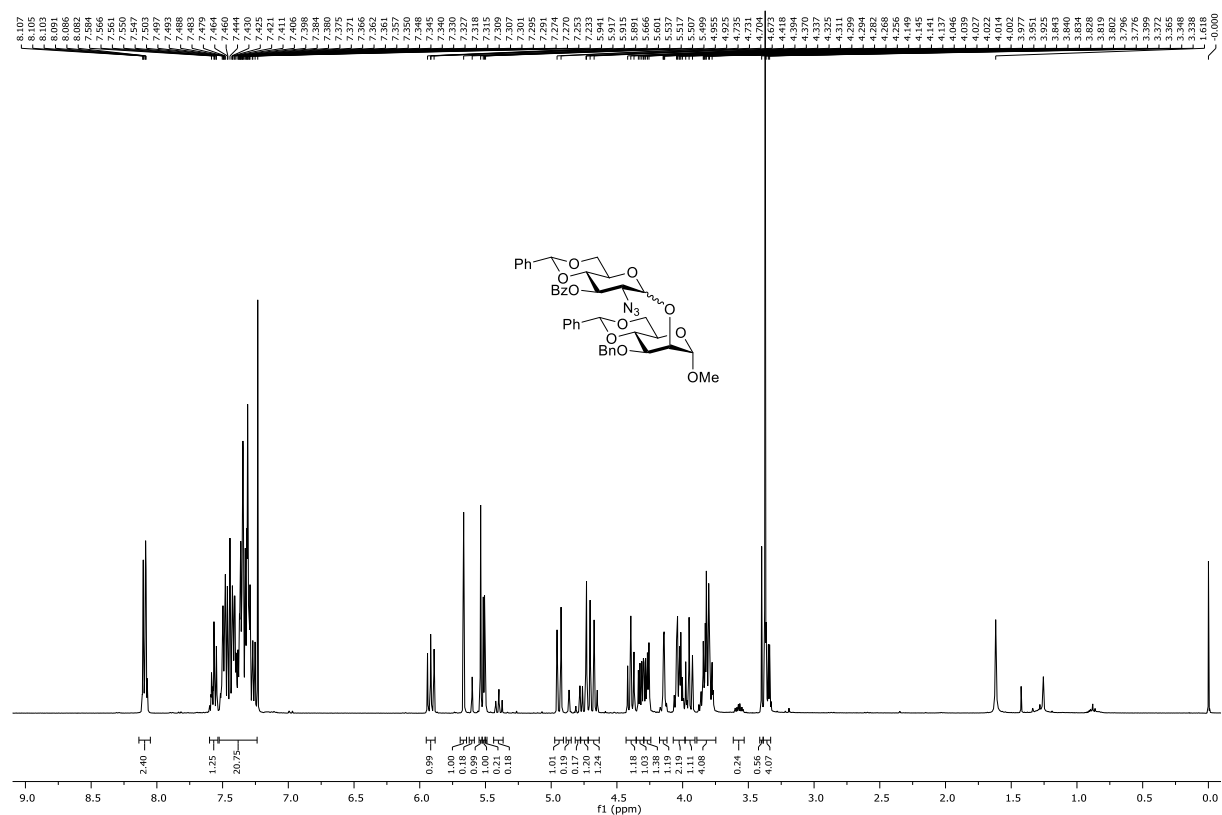

$^{13}\text{C}$ -APT NMR, 101 MHz,  $\text{CDCl}_3$

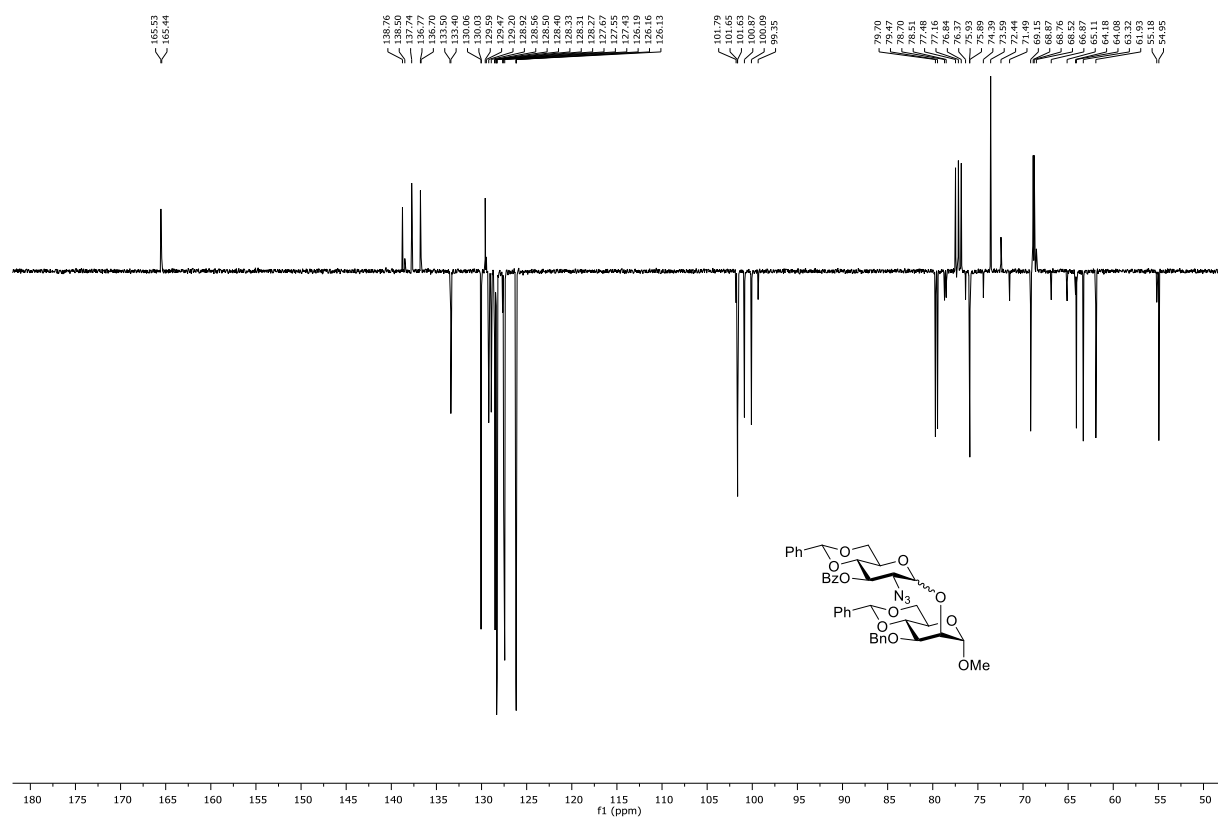

$^1\text{H}$ - $^1\text{H}$  COSY NMR,  $\text{CDCl}_3$

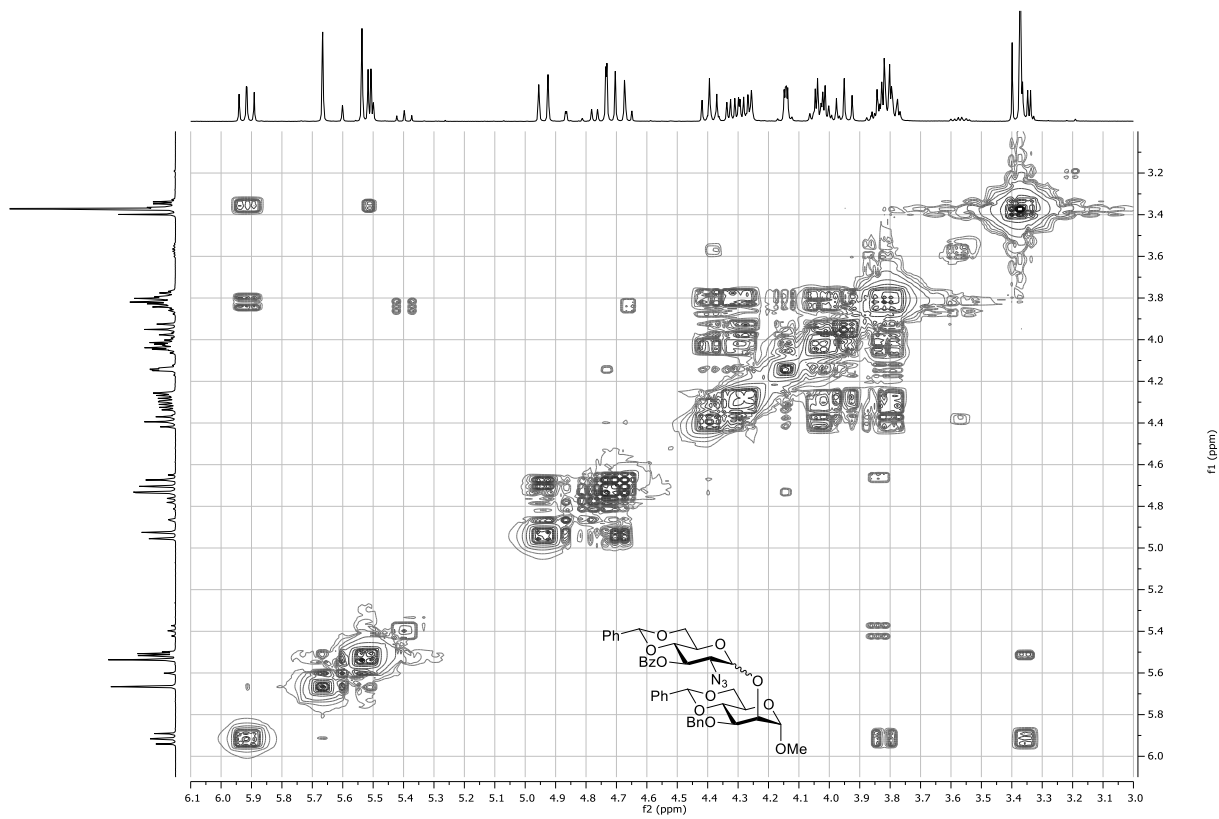

$^1\text{H}$ - $^{13}\text{C}$  HSQC NMR,  $\text{CDCl}_3$

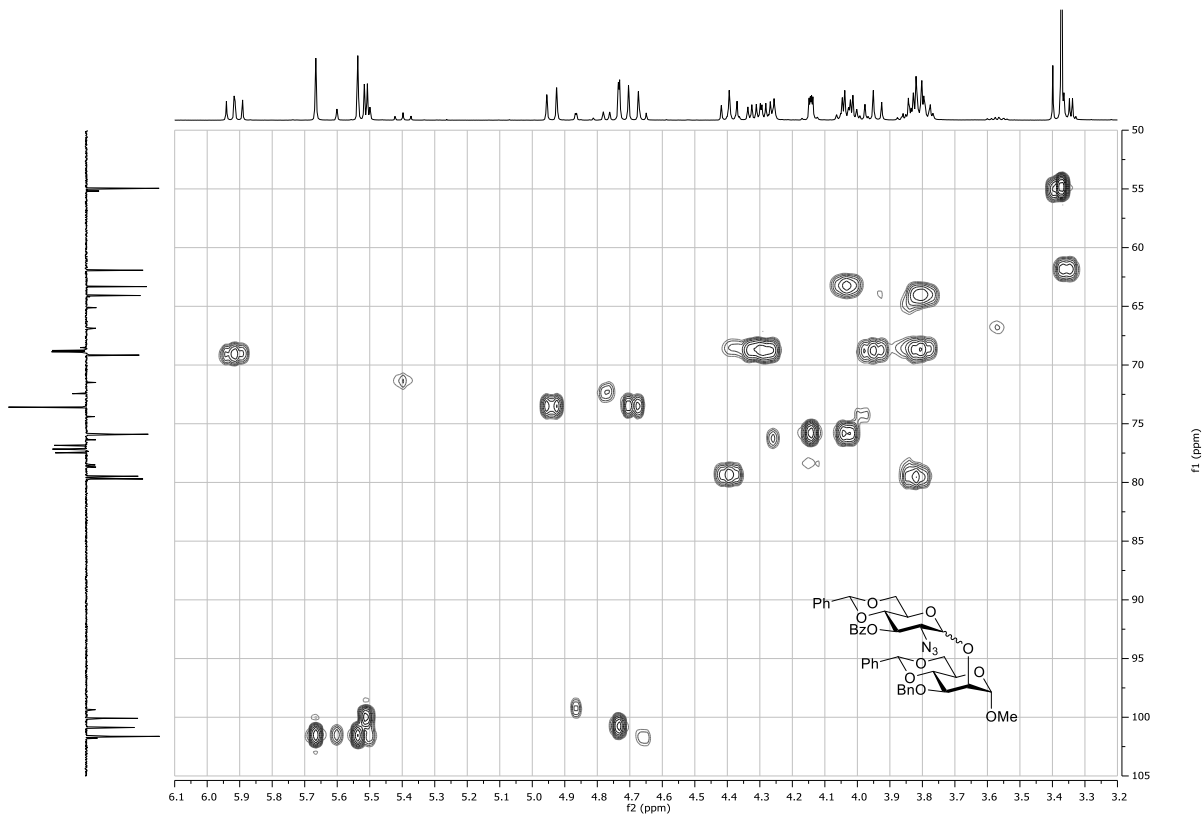

$^1\text{H}$ - $^{13}\text{C}$  HMBC NMR,  $\text{CDCl}_3$

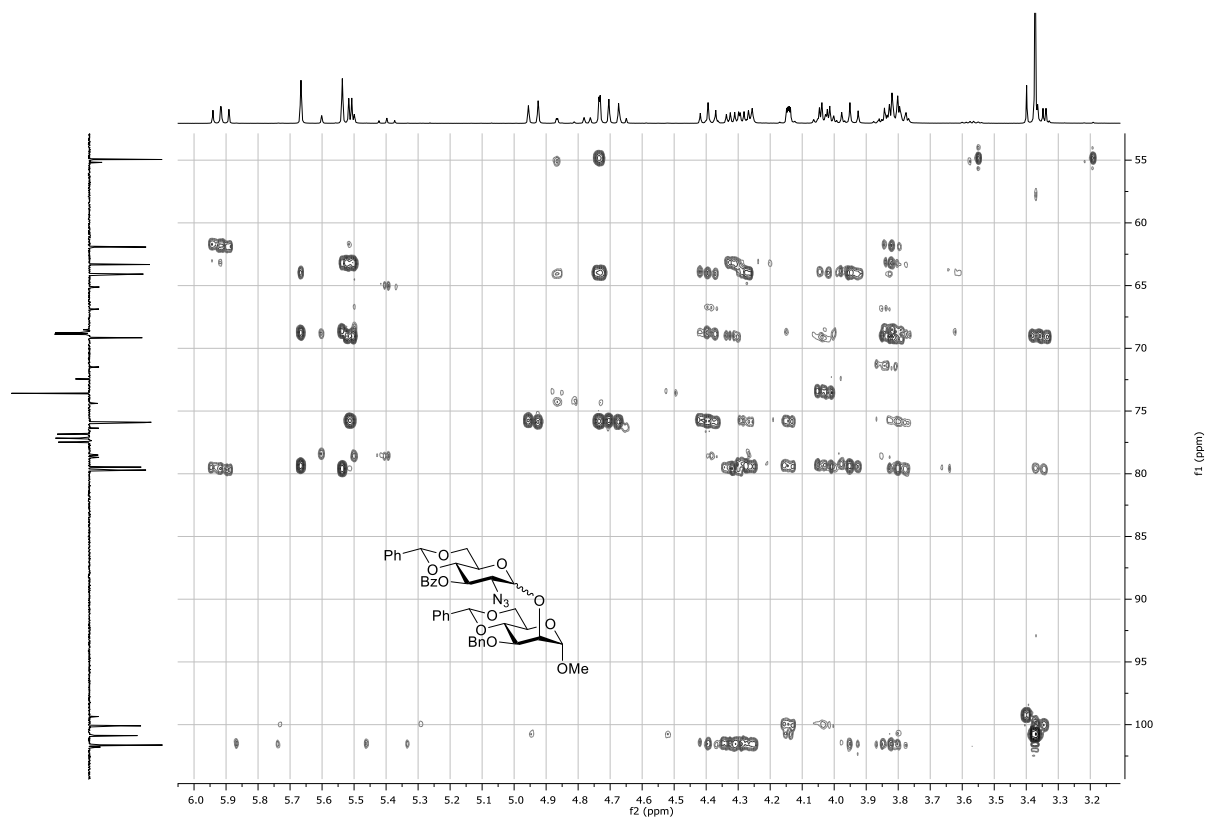

2,2,2-Trifluoroethyl 2-azido-3-O-benzoyl-4,6-O-benzylidene-2-deoxy- $\alpha$ -D-glucopyranoside (**4J**).

$^1\text{H}$  NMR, 400 MHz,  $\text{CDCl}_3$

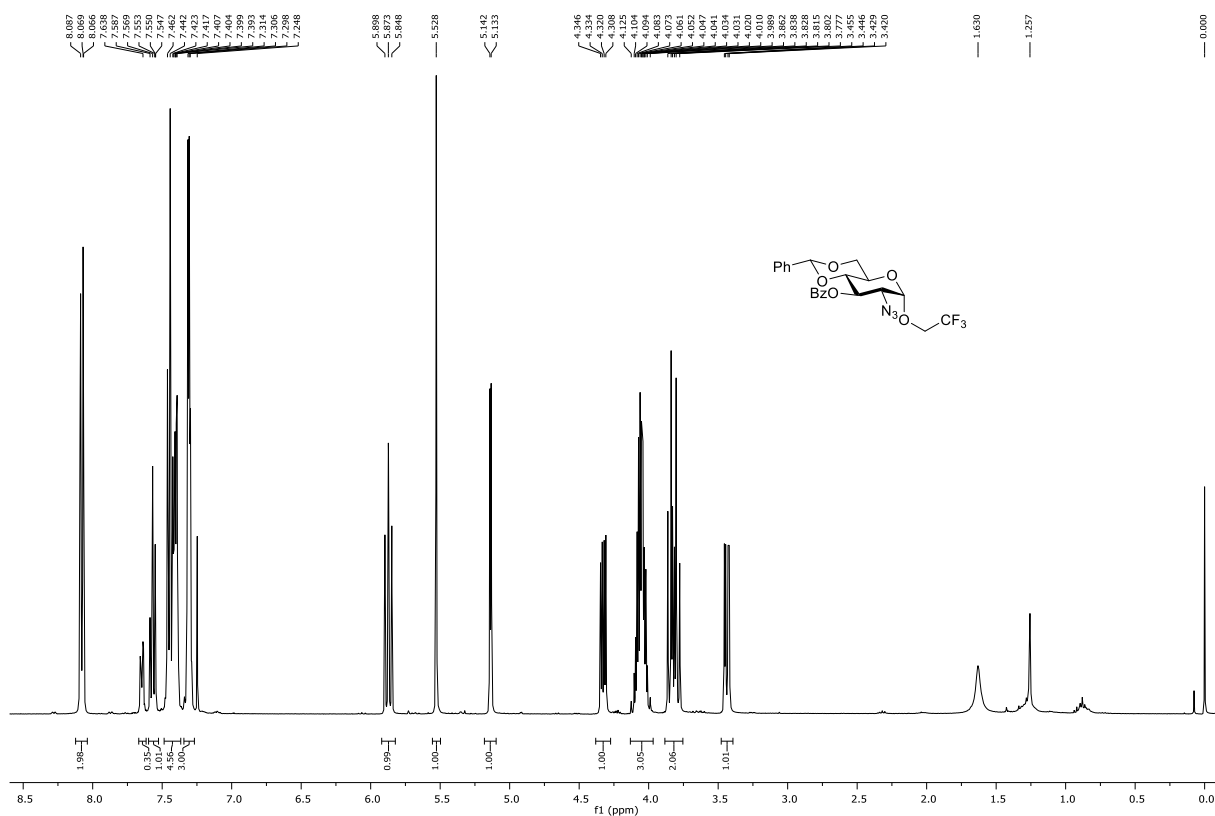

$^{13}\text{C}$ -APT NMR, 101 MHz,  $\text{CDCl}_3$

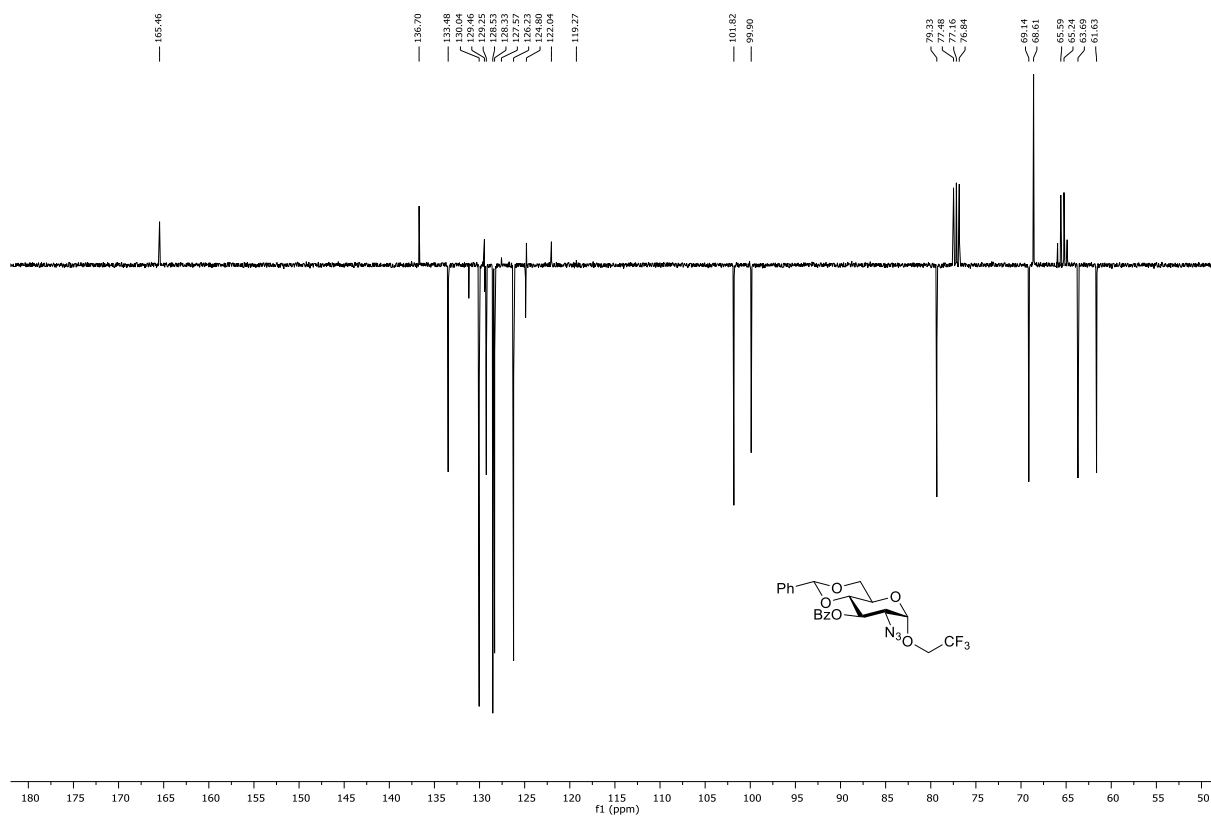

$^1\text{H}$ - $^1\text{H}$  COSY NMR,  $\text{CDCl}_3$

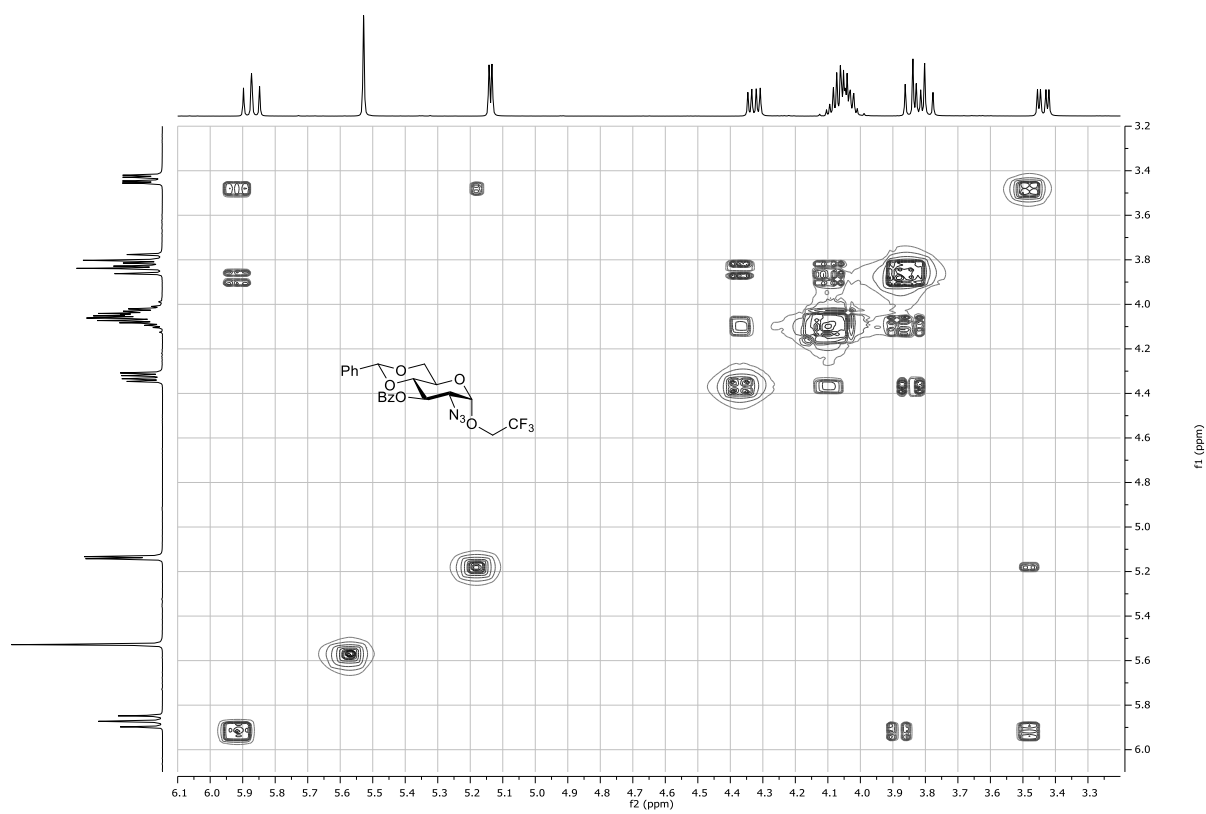

$^1\text{H}$ - $^{13}\text{C}$  HSQC NMR,  $\text{CDCl}_3$

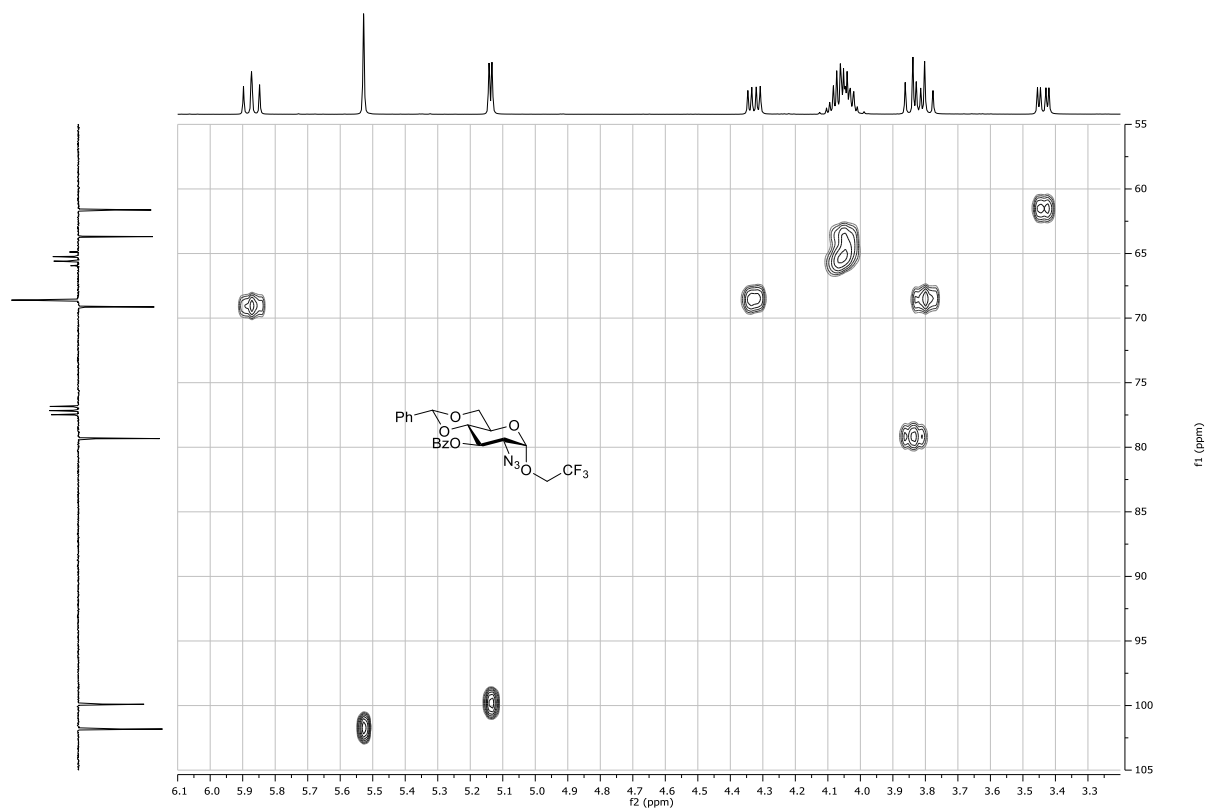

Ethyl 3-O-benzyl-4,6-O-benzylidene-2-deoxy-2-(3,5-dinitro-4-pyridone)- $\beta$ -D-glucopyranoside (**5A**).

$^1\text{H}$  NMR, 400 MHz,  $\text{CDCl}_3$

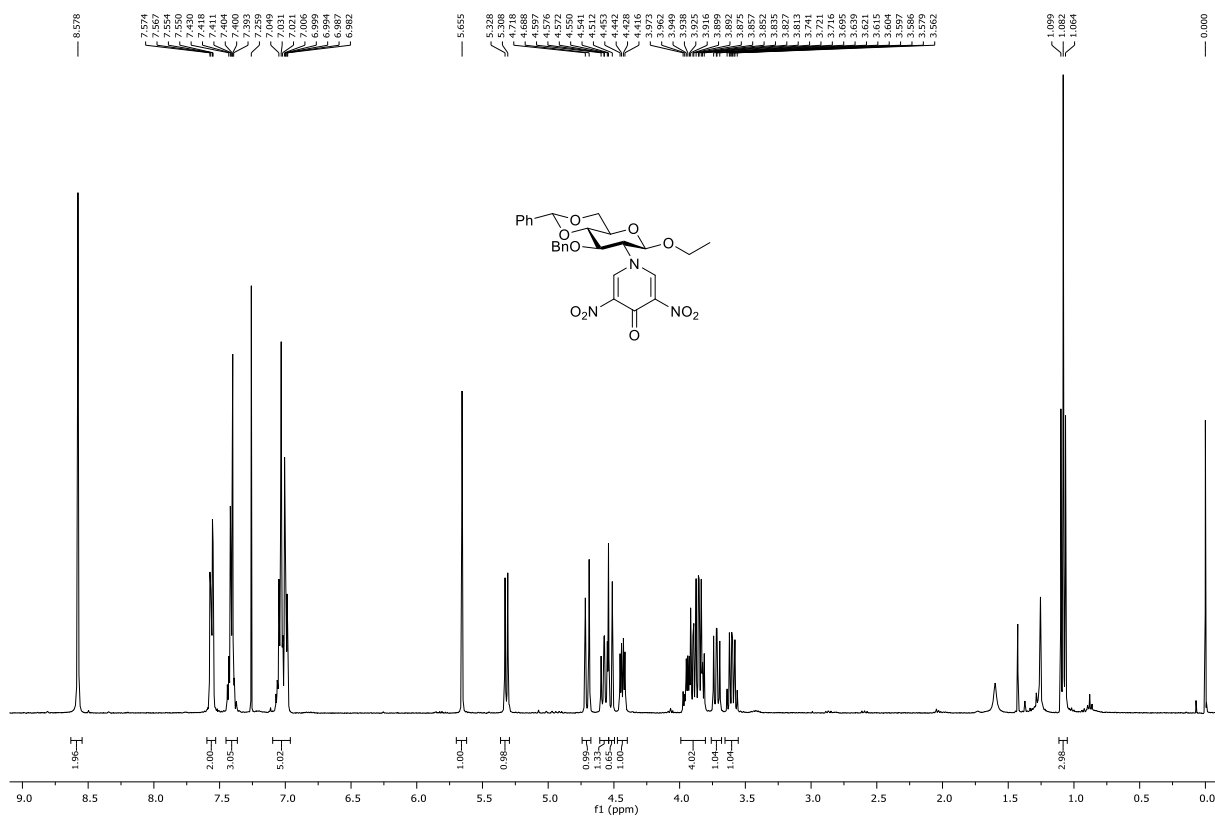

$^{13}\text{C}$ -APT NMR, 101 MHz,  $\text{CDCl}_3$

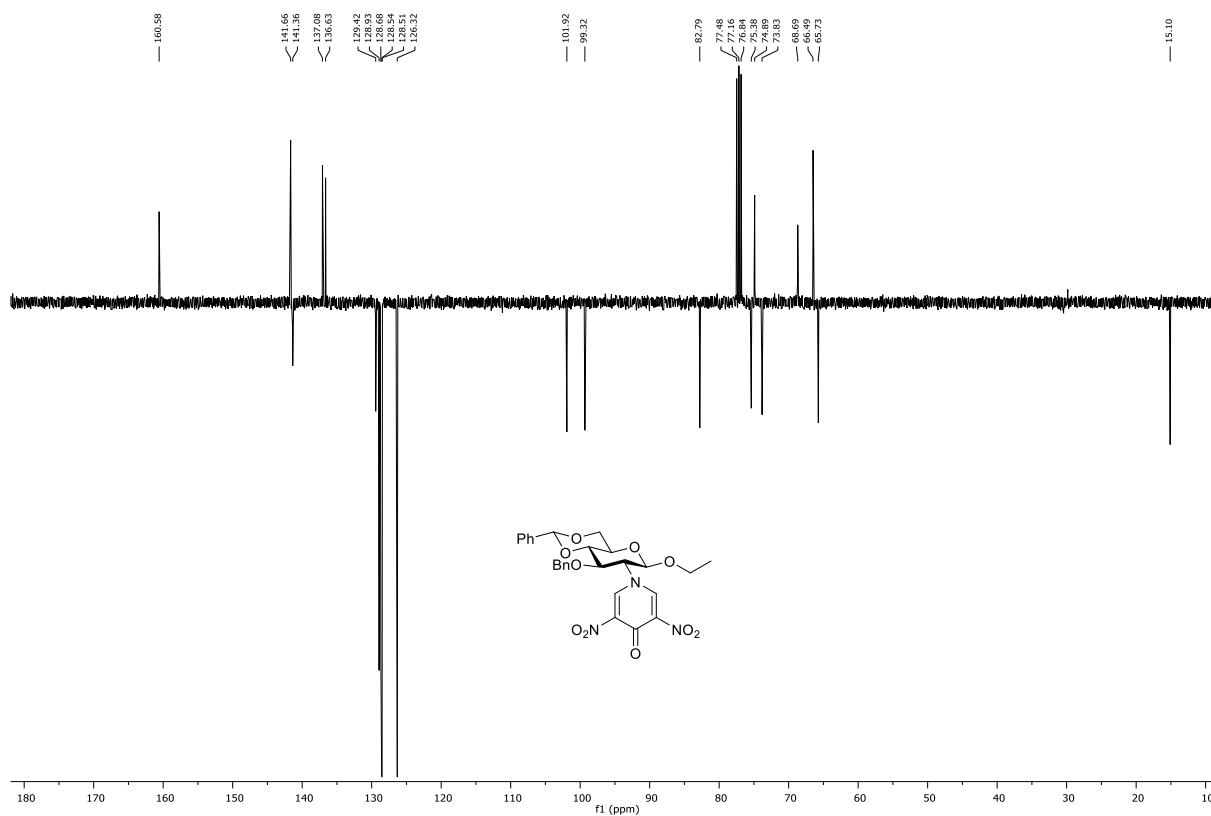

$^1\text{H}$ - $^1\text{H}$  COSY NMR,  $\text{CDCl}_3$

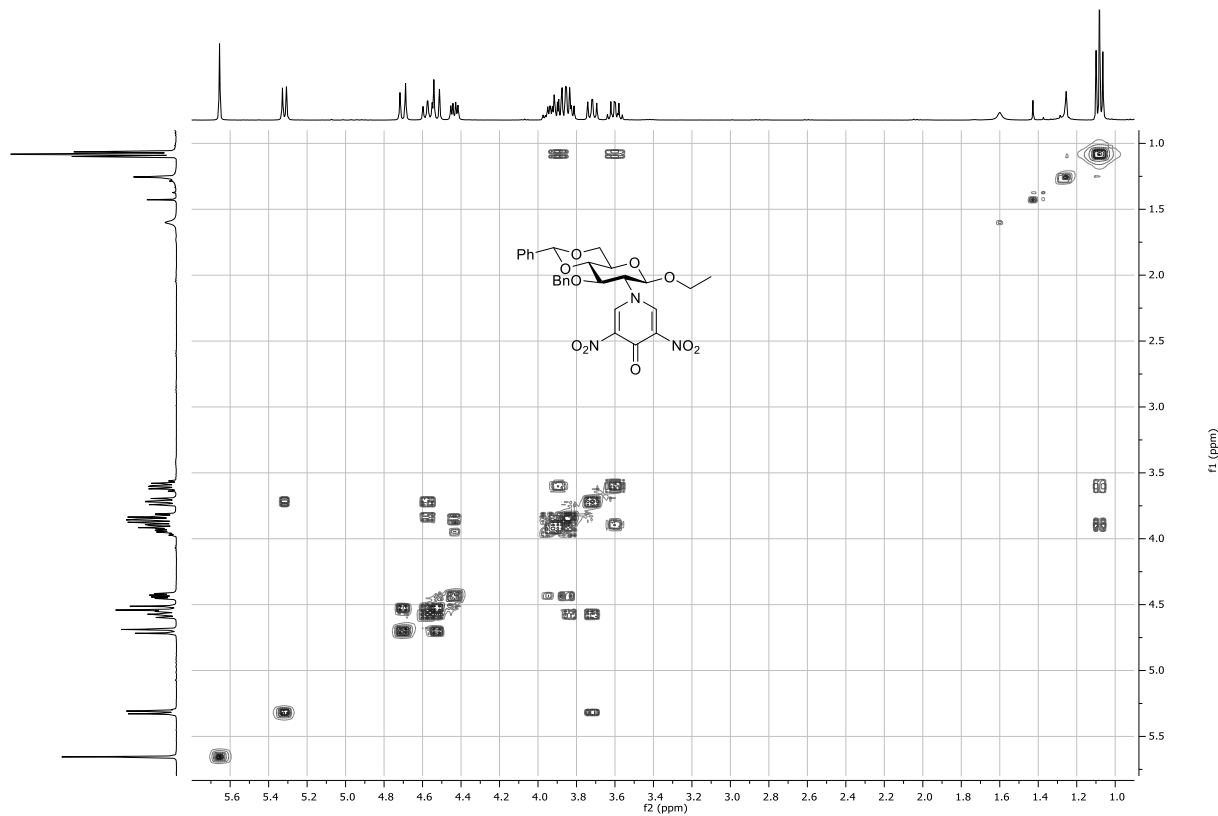

$^1\text{H}$ - $^{13}\text{C}$  HSQC NMR,  $\text{CDCl}_3$

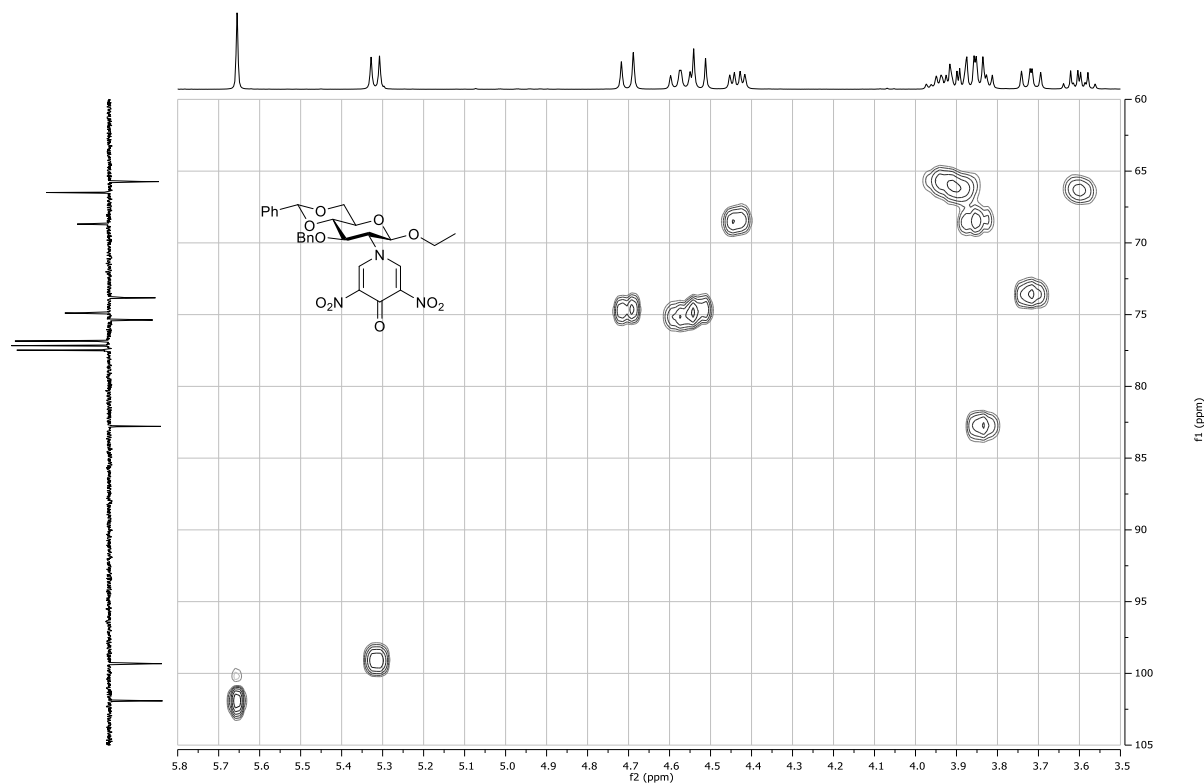

Cyclohexyl 3-*O*-benzyl-4,6-*O*-benzylidene-2-deoxy-2-(3,5-dinitro-4-pyridone)- $\beta$ -D-glucopyranoside (**5B**).

$^1\text{H}$  NMR, 400 MHz,  $\text{CDCl}_3$

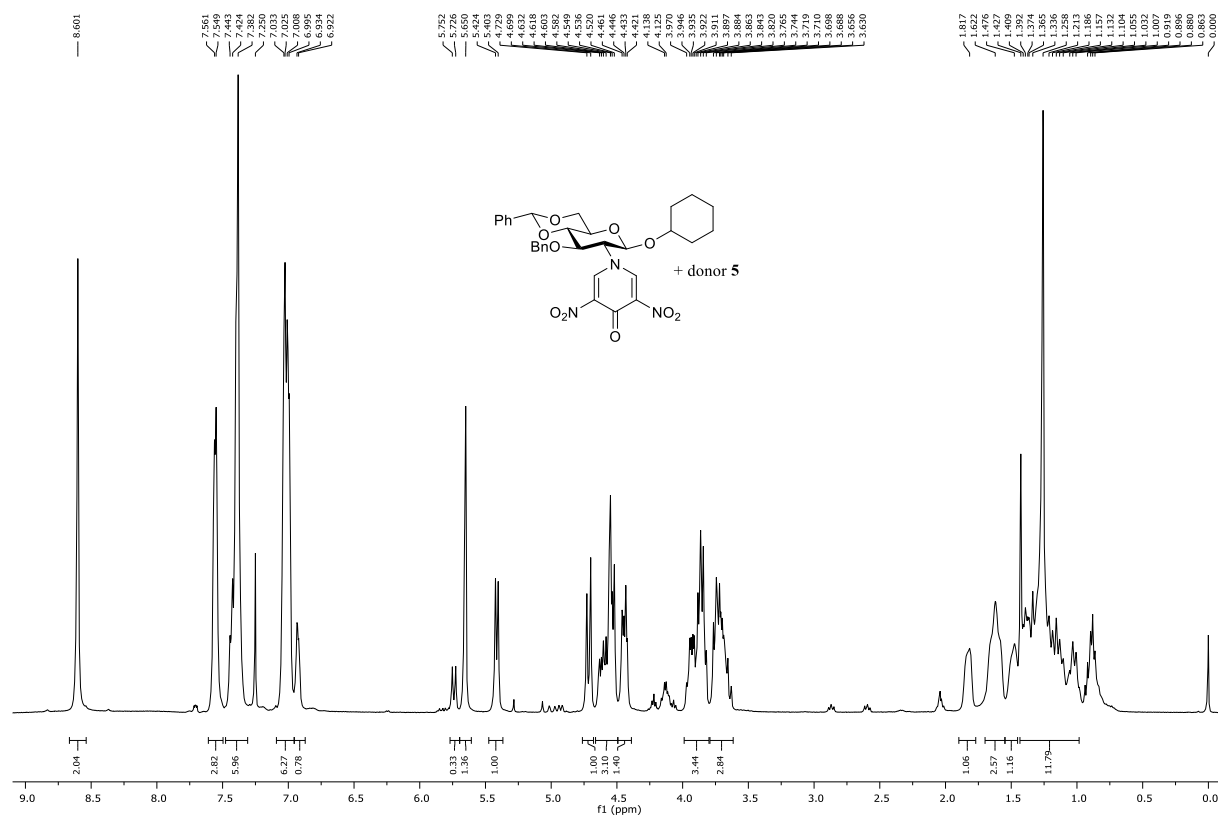



$^{13}\text{C}$ -APT NMR, 101 MHz,  $\text{CDCl}_3$

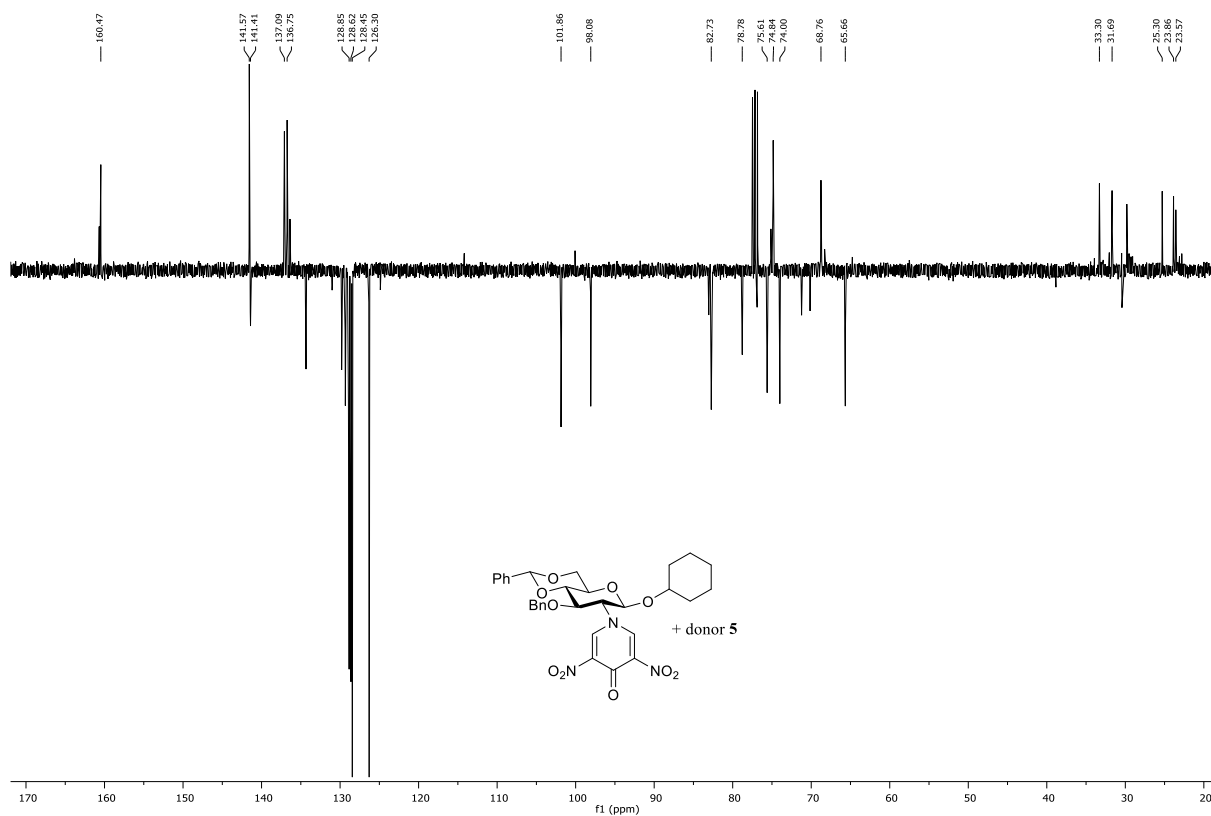

$^1\text{H}$ - $^1\text{H}$  COSY NMR,  $\text{CDCl}_3$

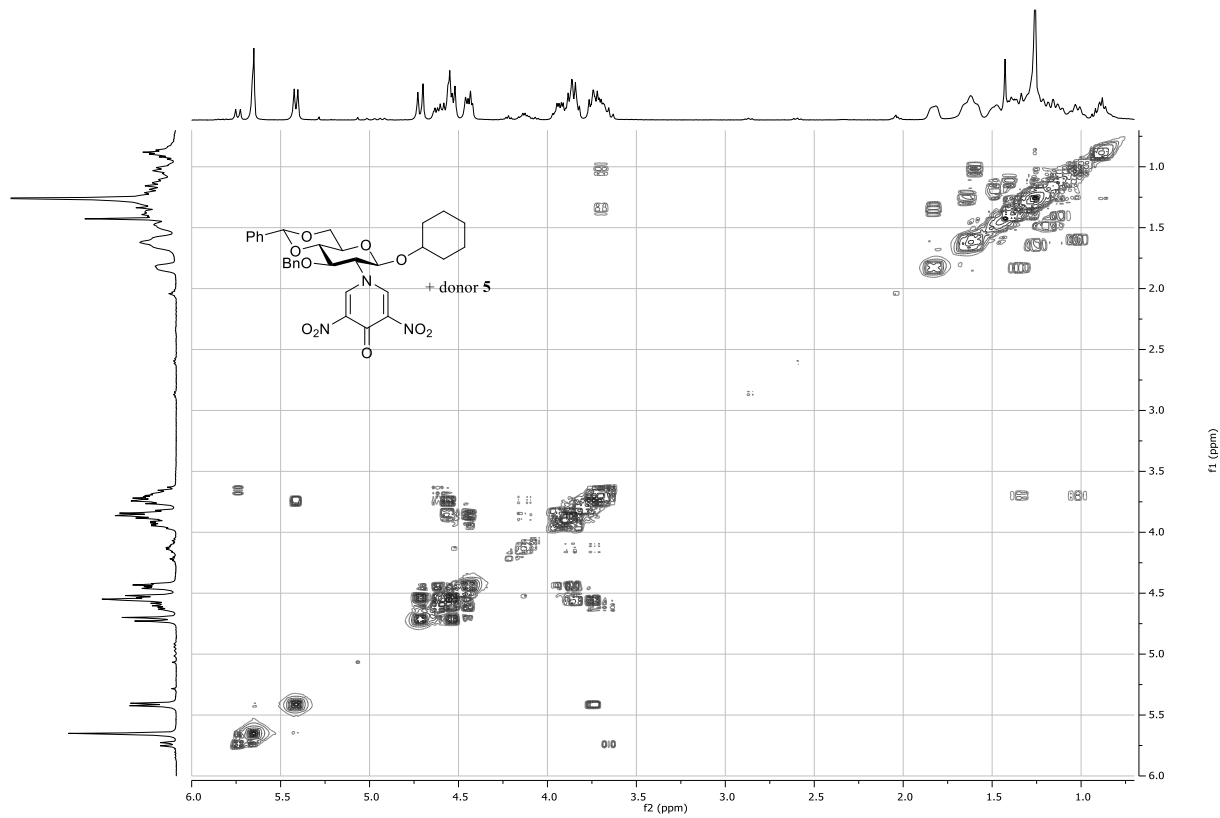

$^1\text{H}$ - $^{13}\text{C}$  HSQC NMR,  $\text{CDCl}_3$

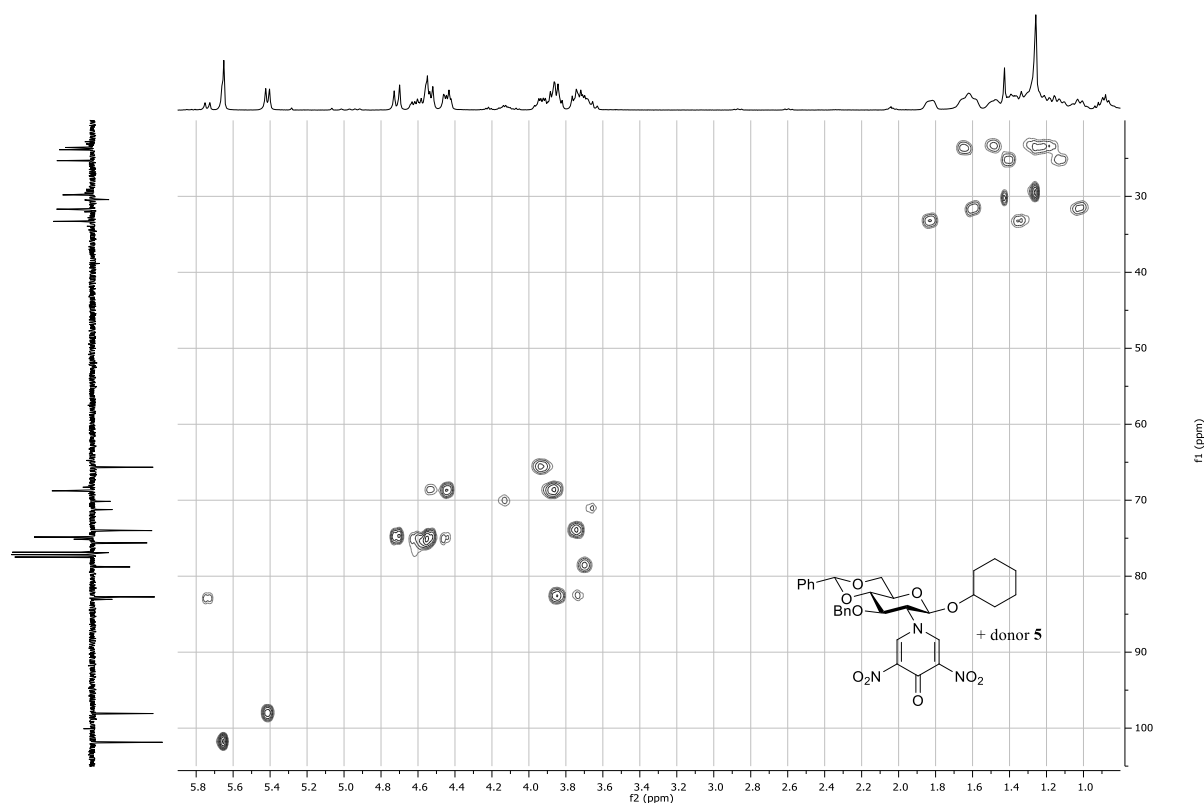

Methyl 6-*O*-(3-*O*-benzyl-4,6-*O*-benzylidene-2-deoxy-2-(3,5-dinitro-4-pyridone)- $\beta$ -D-glucopyranosyl)-2,3,4-tri-*O*-benzyl- $\alpha$ -D-glucopyranoside (**5C**).

$^1\text{H}$  NMR, 400 MHz,  $\text{CDCl}_3$

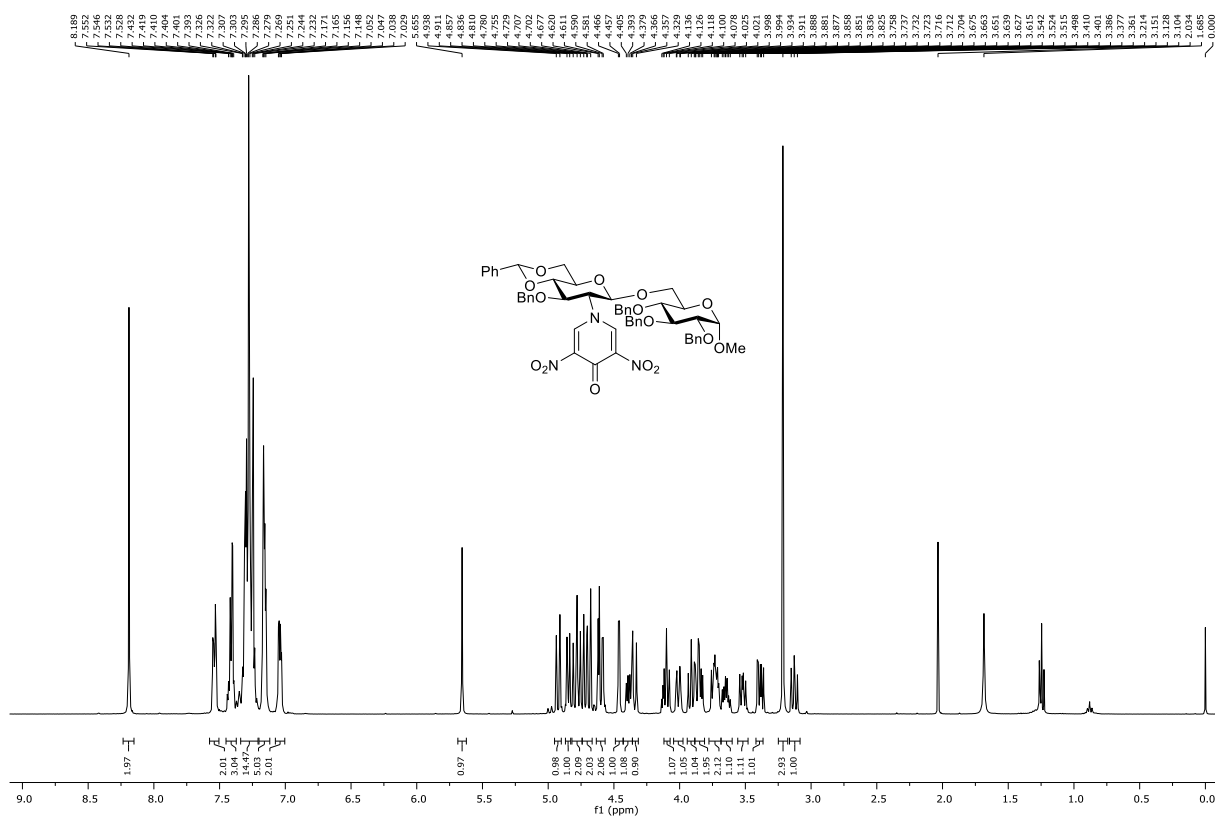

$^{13}\text{C}$ -APT NMR, 101 MHz,  $\text{CDCl}_3$

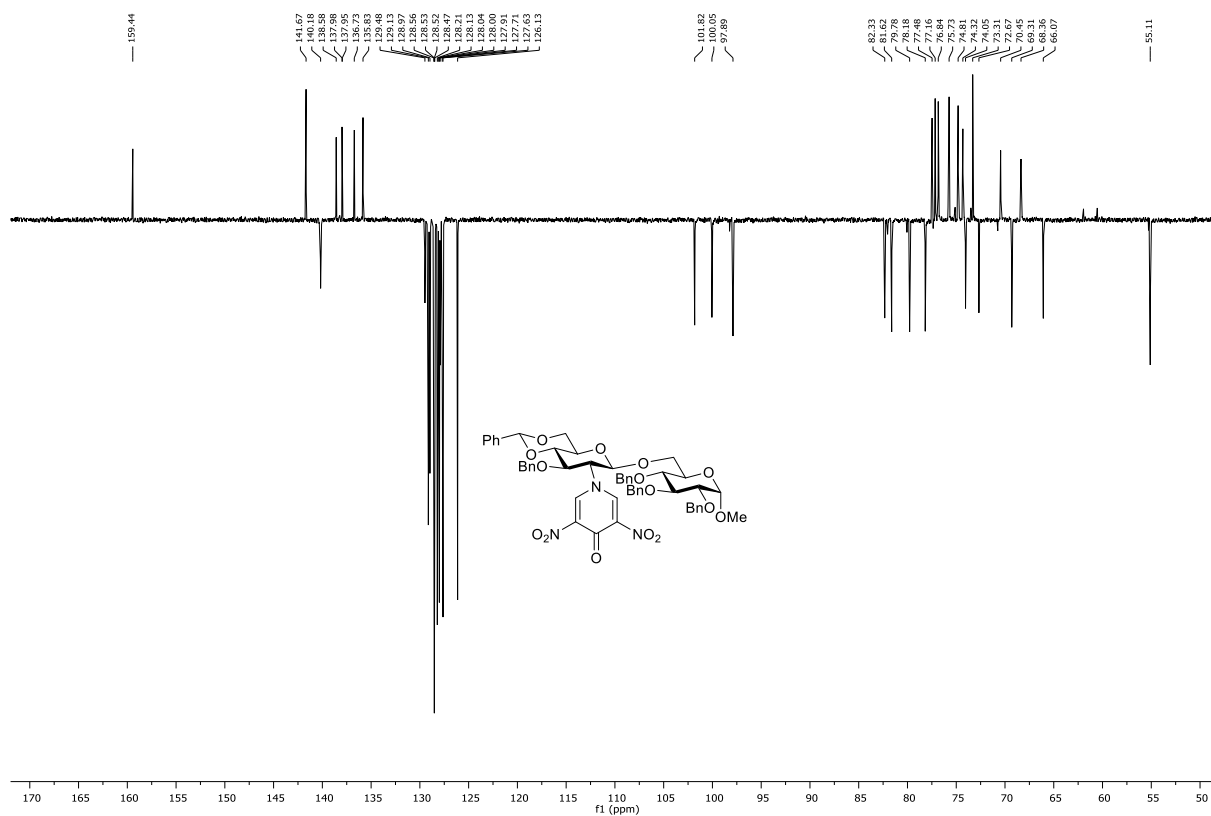

$^1\text{H}$ - $^1\text{H}$  COSY NMR,  $\text{CDCl}_3$

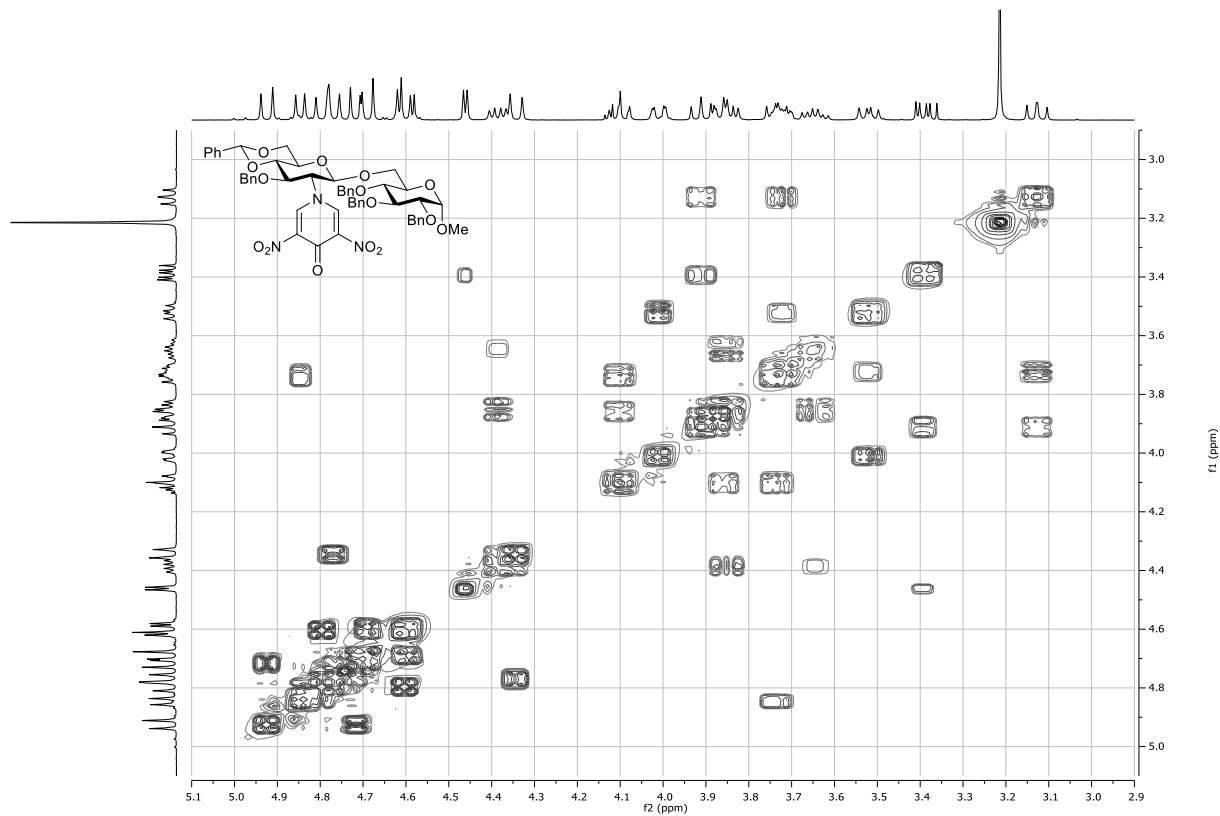

$^1\text{H}$ - $^{13}\text{C}$  HSQC NMR,  $\text{CDCl}_3$

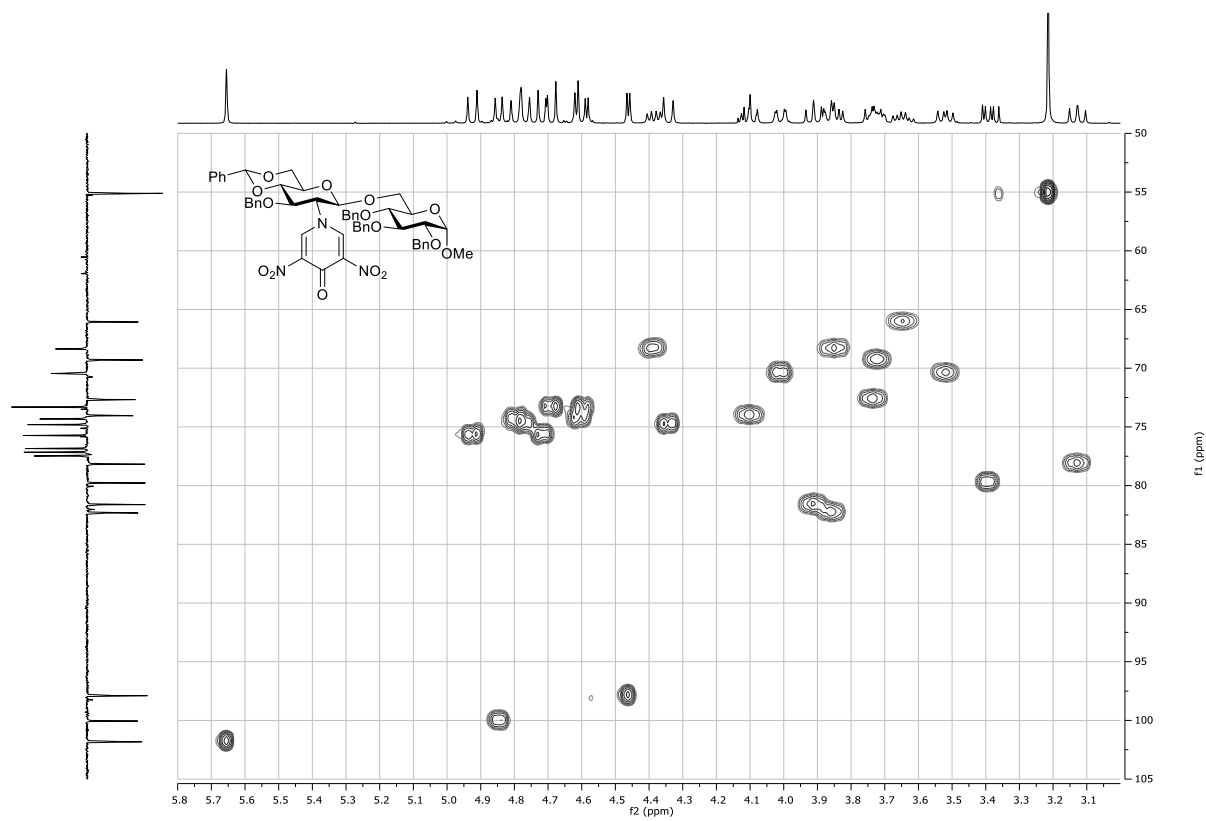

$^1\text{H}$ - $^{13}\text{C}$  HMBC NMR,  $\text{CDCl}_3$

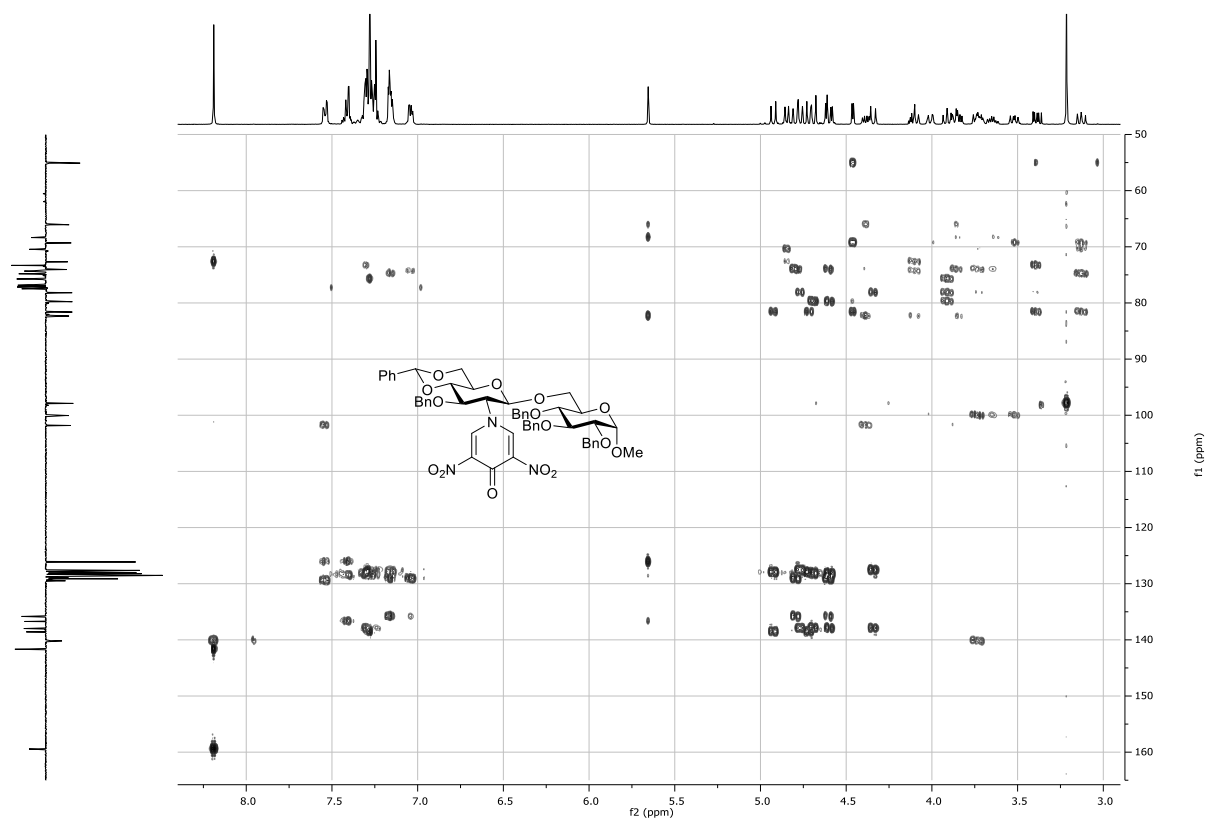

$^1\text{H}$ - $^{13}\text{C}$  HMBC-GATED NMR,  $\text{CDCl}_3$

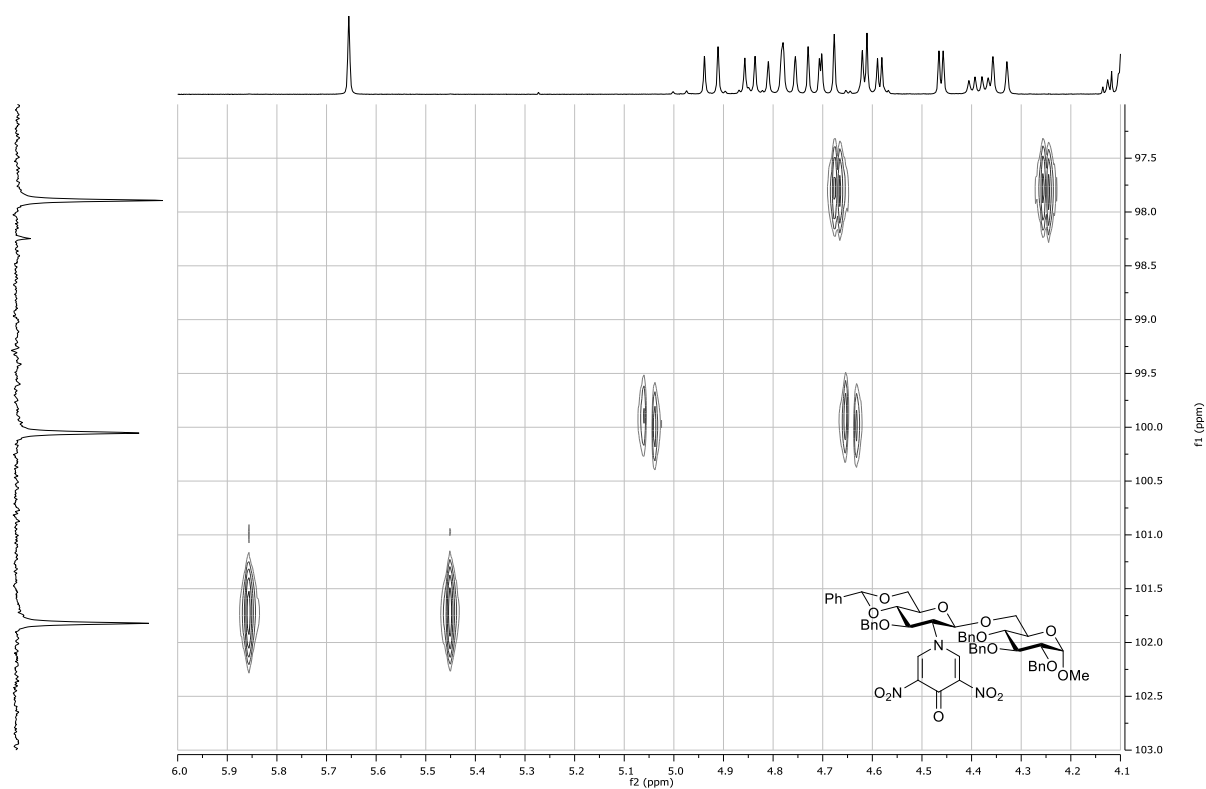

2-Fluoroethyl 3-*O*-benzyl-4,6-*O*-benzylidene-2-deoxy-2-(3,5-dinitro-4-pyridone)- $\beta$ -D-glucopyranoside (**5D**).

$^1\text{H}$  NMR, 400 MHz,  $\text{CDCl}_3$

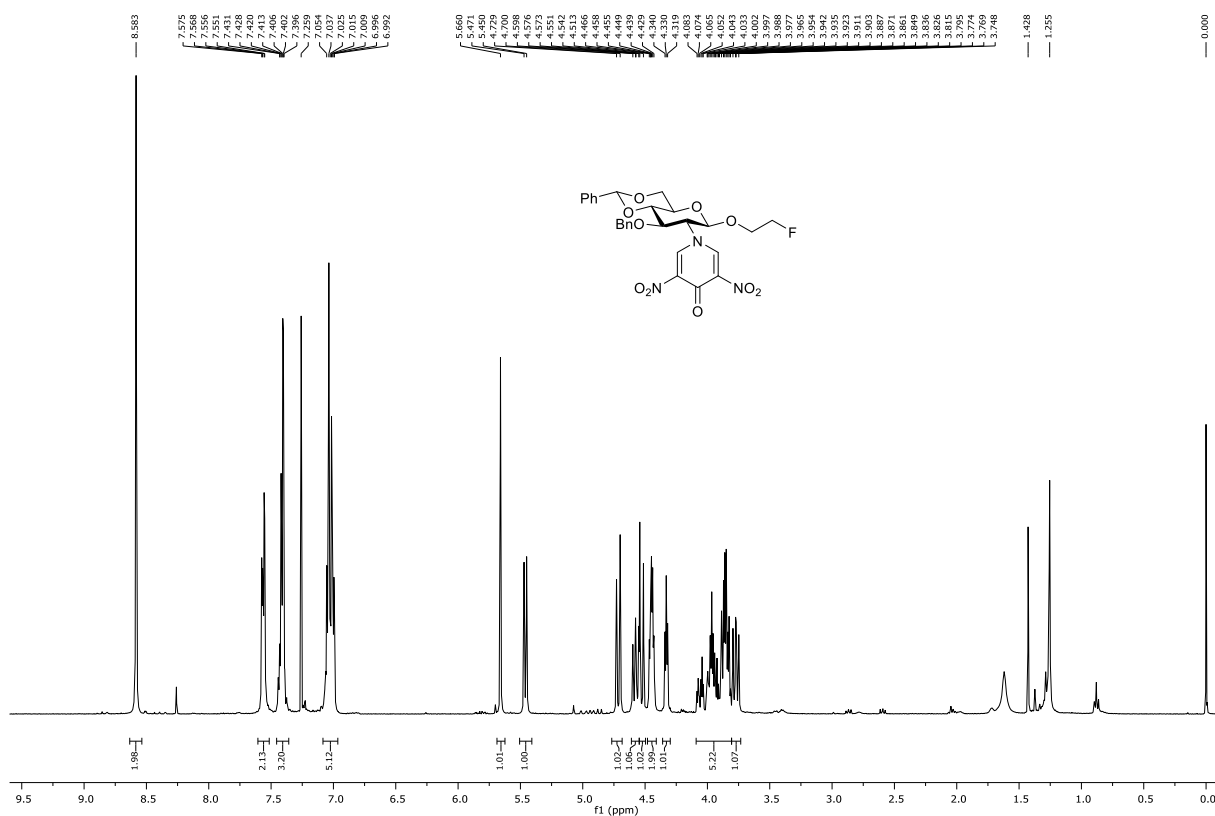

$^{13}\text{C}$ -APT NMR, 101 MHz,  $\text{CDCl}_3$

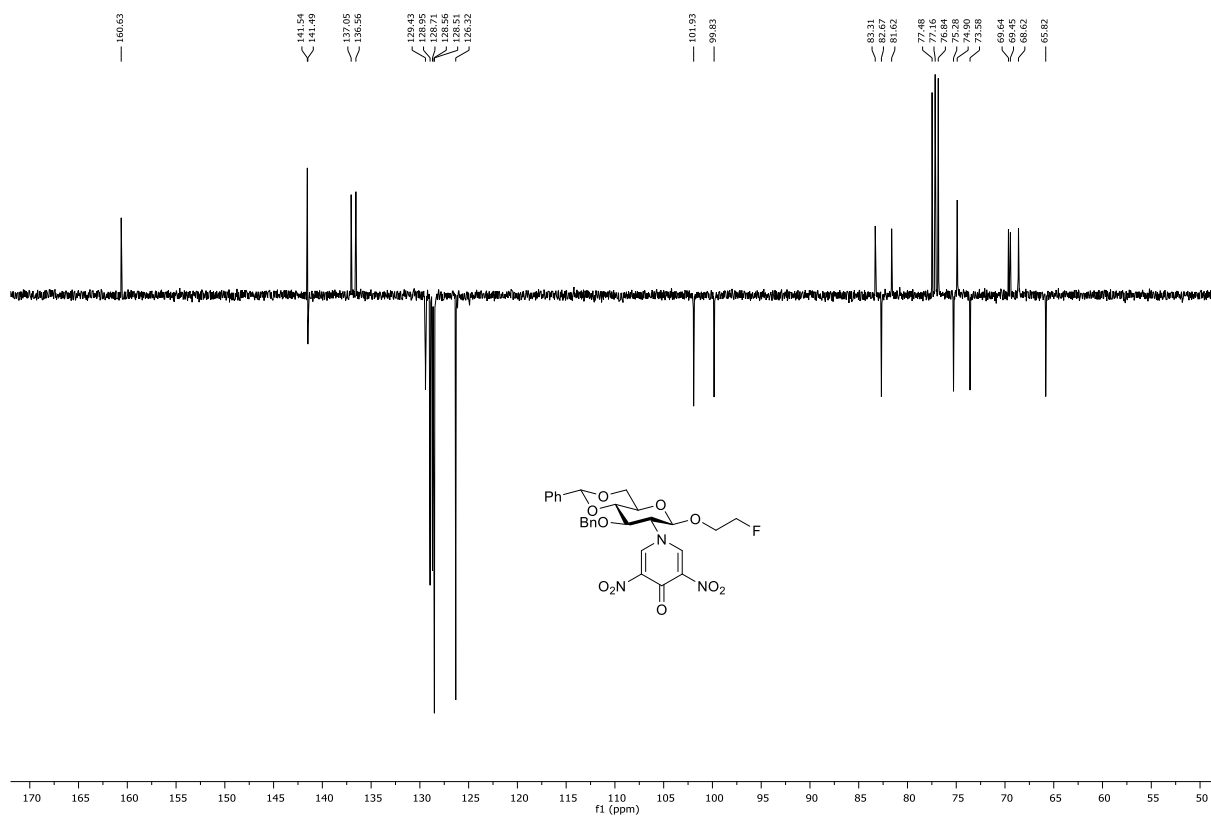

$^1\text{H}$ - $^1\text{H}$  COSY NMR,  $\text{CDCl}_3$

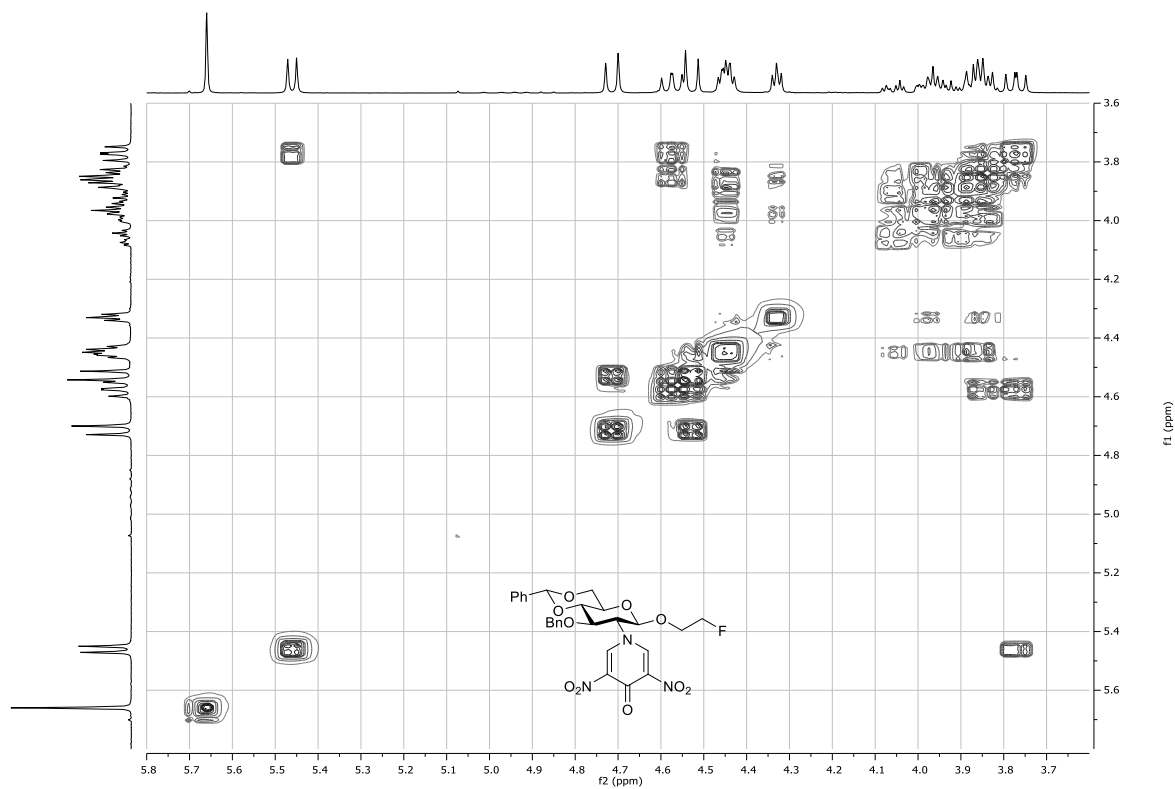

$^1\text{H}$ - $^{13}\text{C}$  HSQC NMR,  $\text{CDCl}_3$

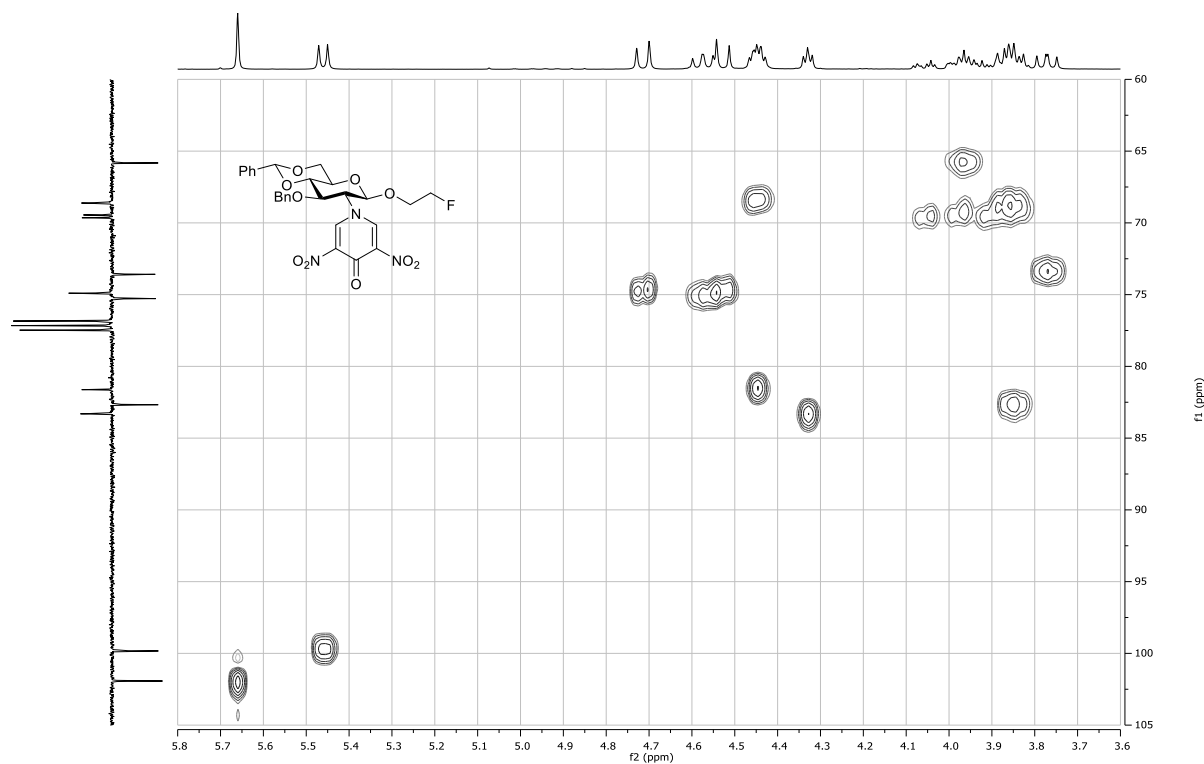

Methyl 4-*O*-(3-*O*-benzyl-4,6-*O*-benzylidene-2-deoxy-2-(3,5-dinitro-4-pyridone)- $\beta$ -D-glucopyranosyl)-2,3,6-tri-*O*-benzyl- $\alpha$ -D-glucopyranoside (**5E**).

$^1\text{H}$  NMR, 500 MHz,  $\text{CDCl}_3$

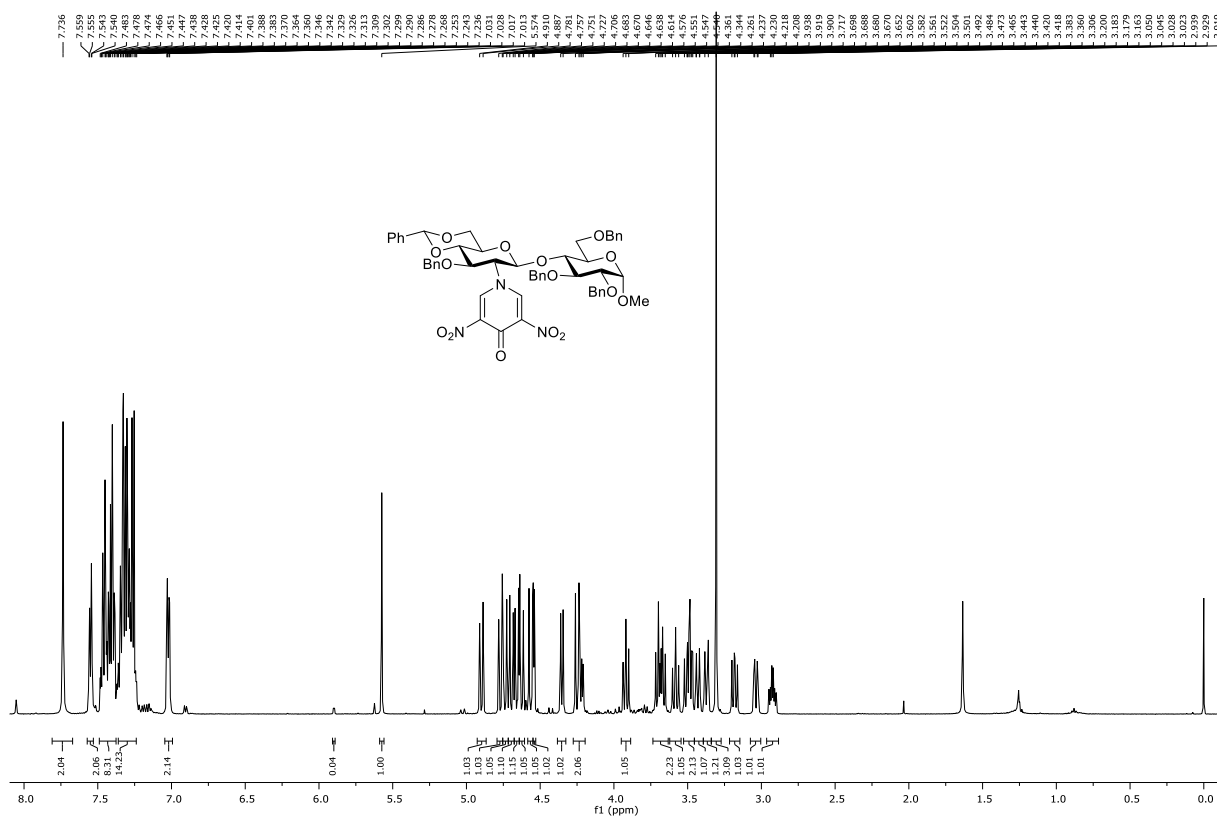

$^{13}\text{C}$ -APT NMR, 126 MHz,  $\text{CDCl}_3$

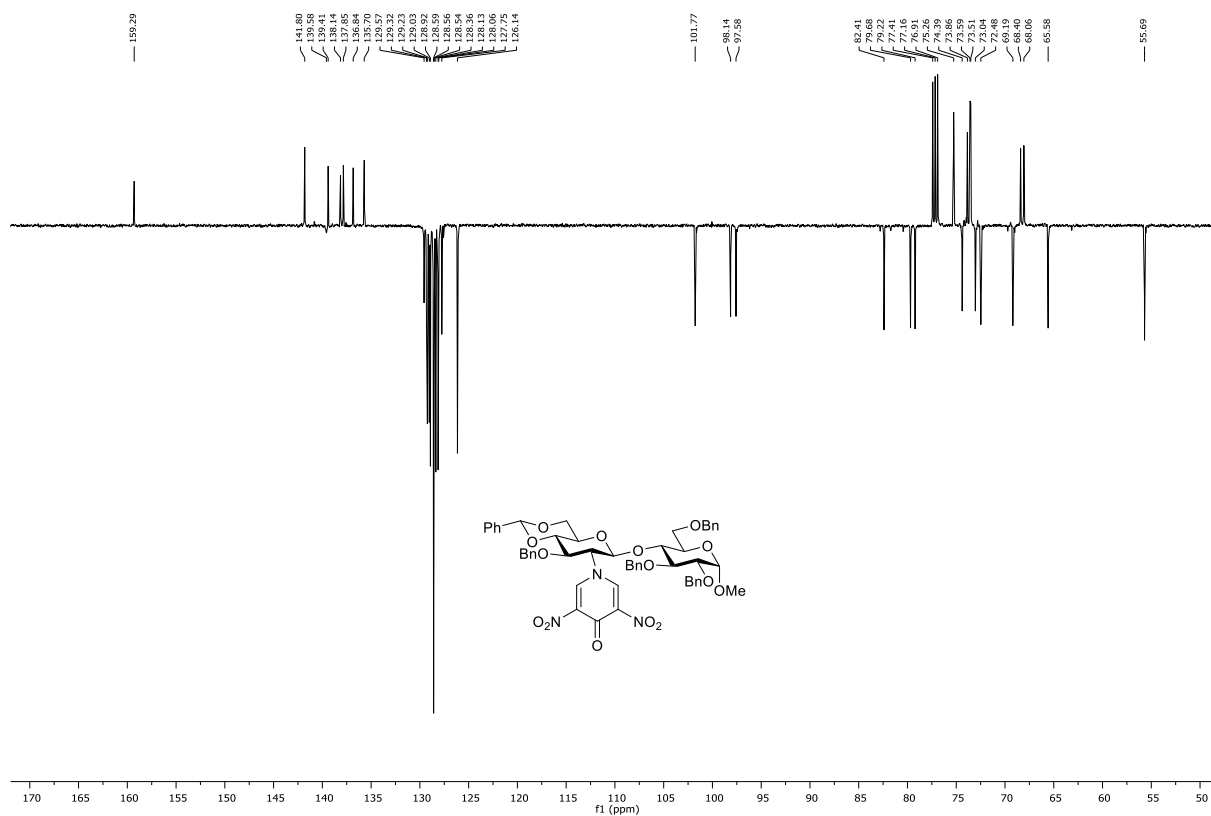

$^1\text{H}$ - $^1\text{H}$  COSY NMR,  $\text{CDCl}_3$

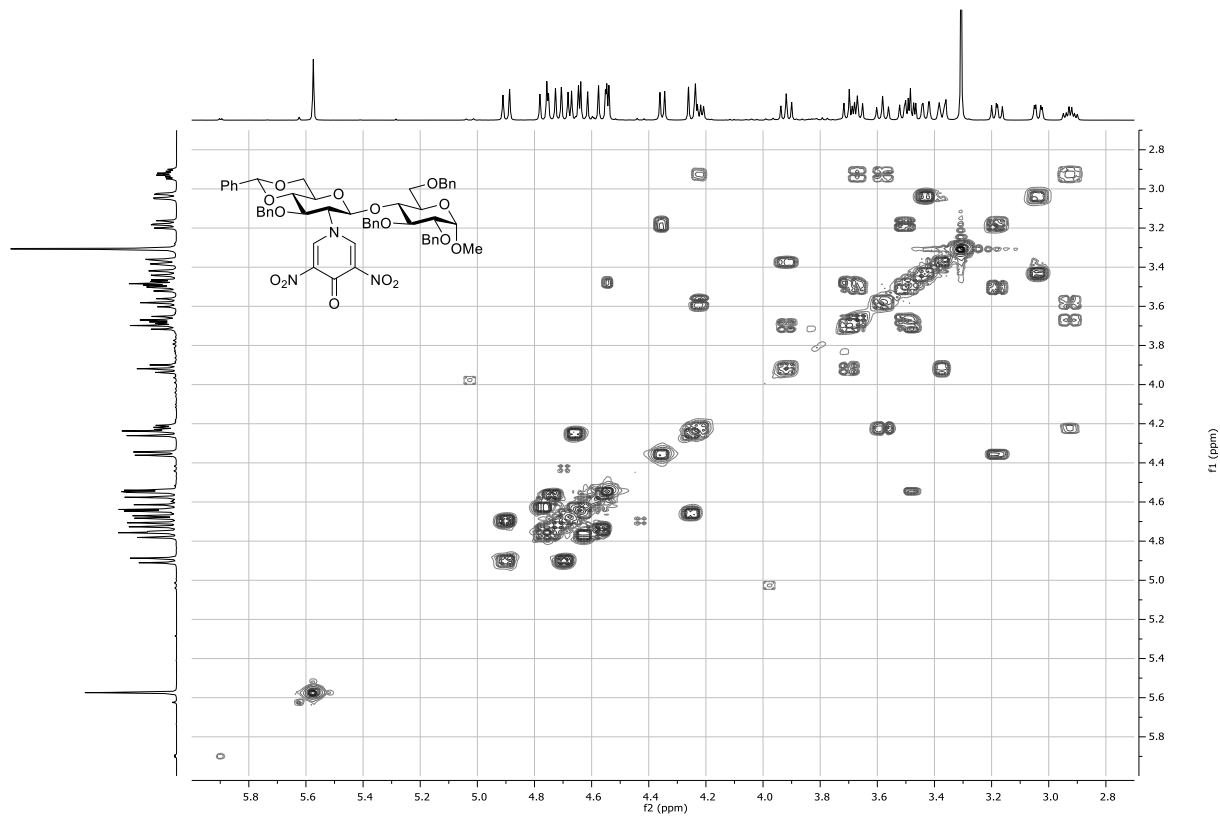



$^1\text{H}$ - $^{13}\text{C}$  HSQC NMR,  $\text{CDCl}_3$

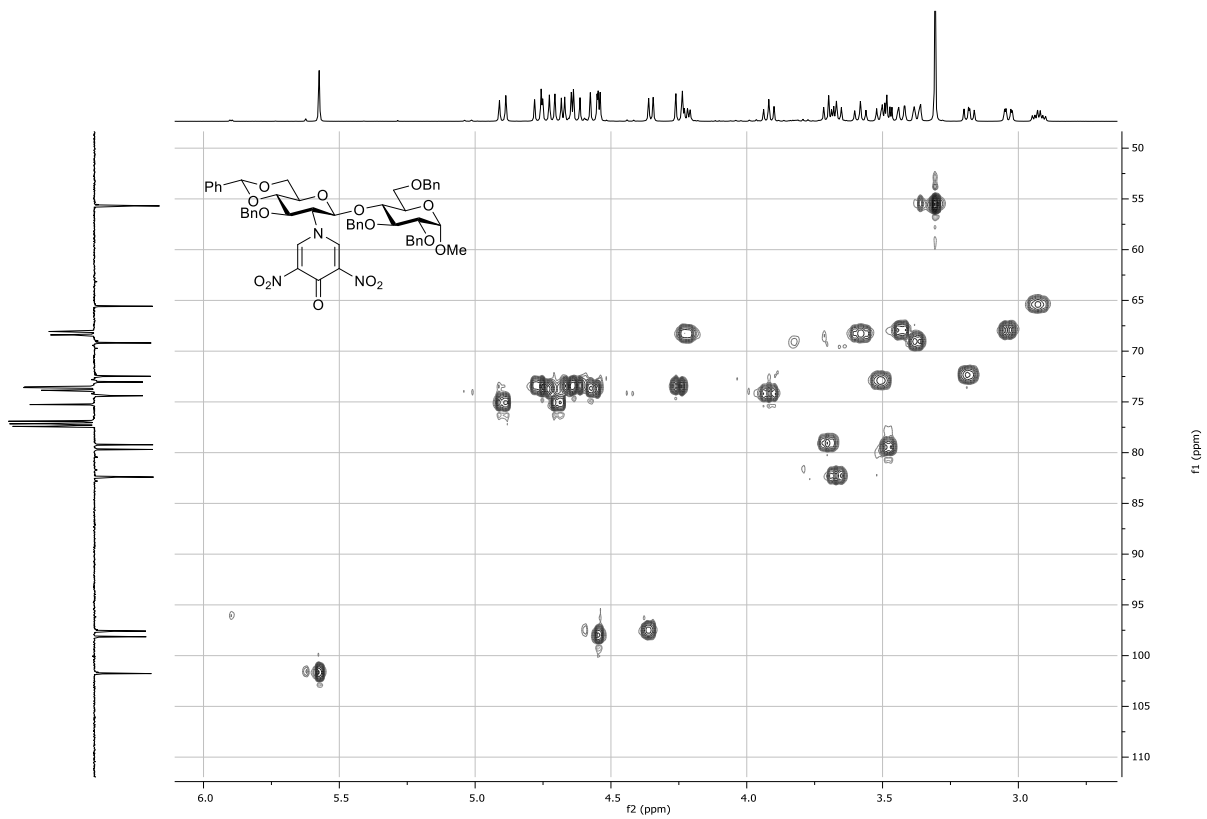

$^1\text{H}$ - $^{13}\text{C}$  HMBC NMR,  $\text{CDCl}_3$

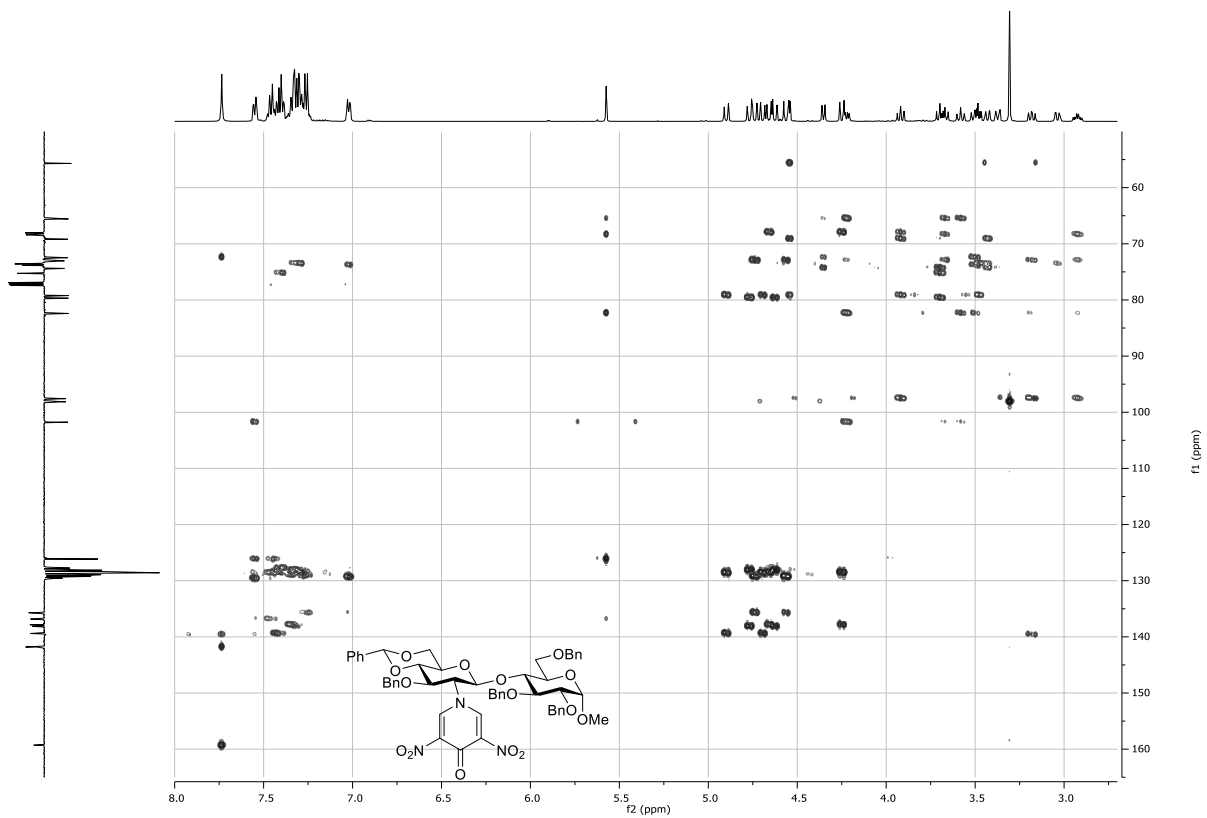

$^1\text{H}$ - $^{13}\text{C}$  HMBC-GATED NMR,  $\text{CDCl}_3$

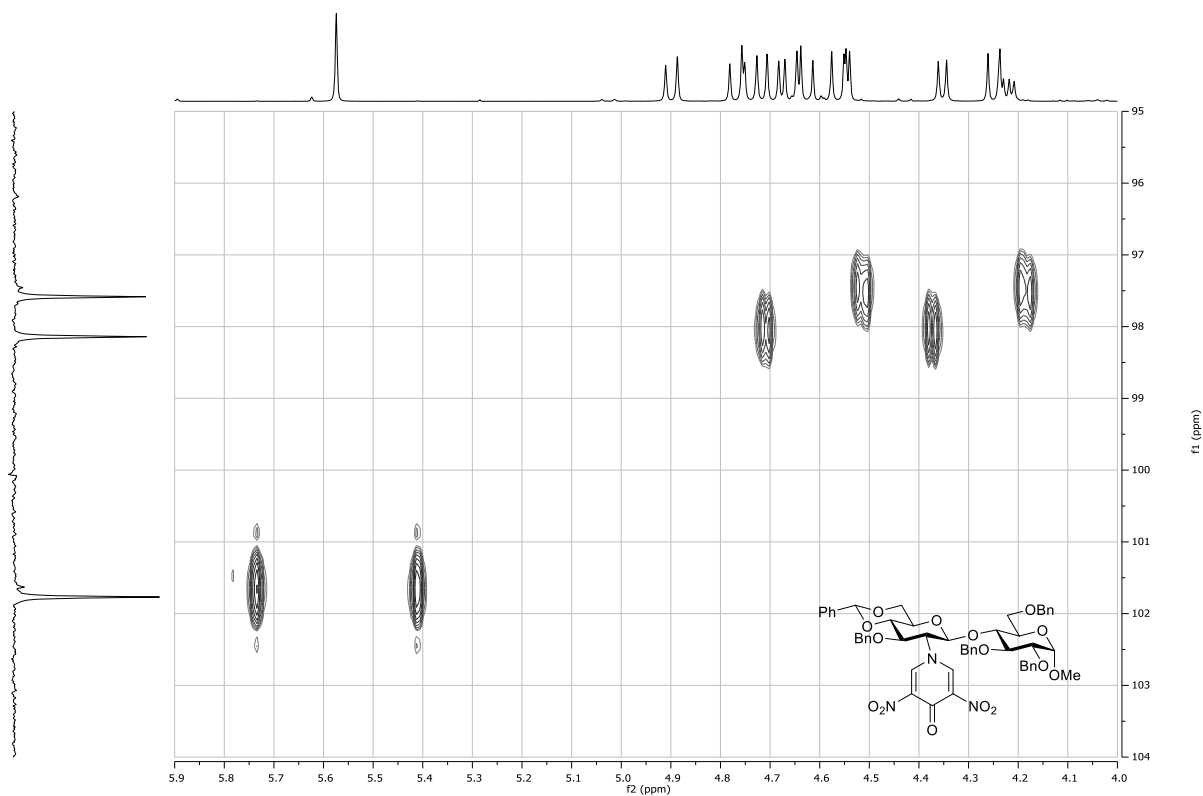

$^1\text{H}$ - $^1\text{H}$  NOESY NMR,  $\text{CDCl}_3$

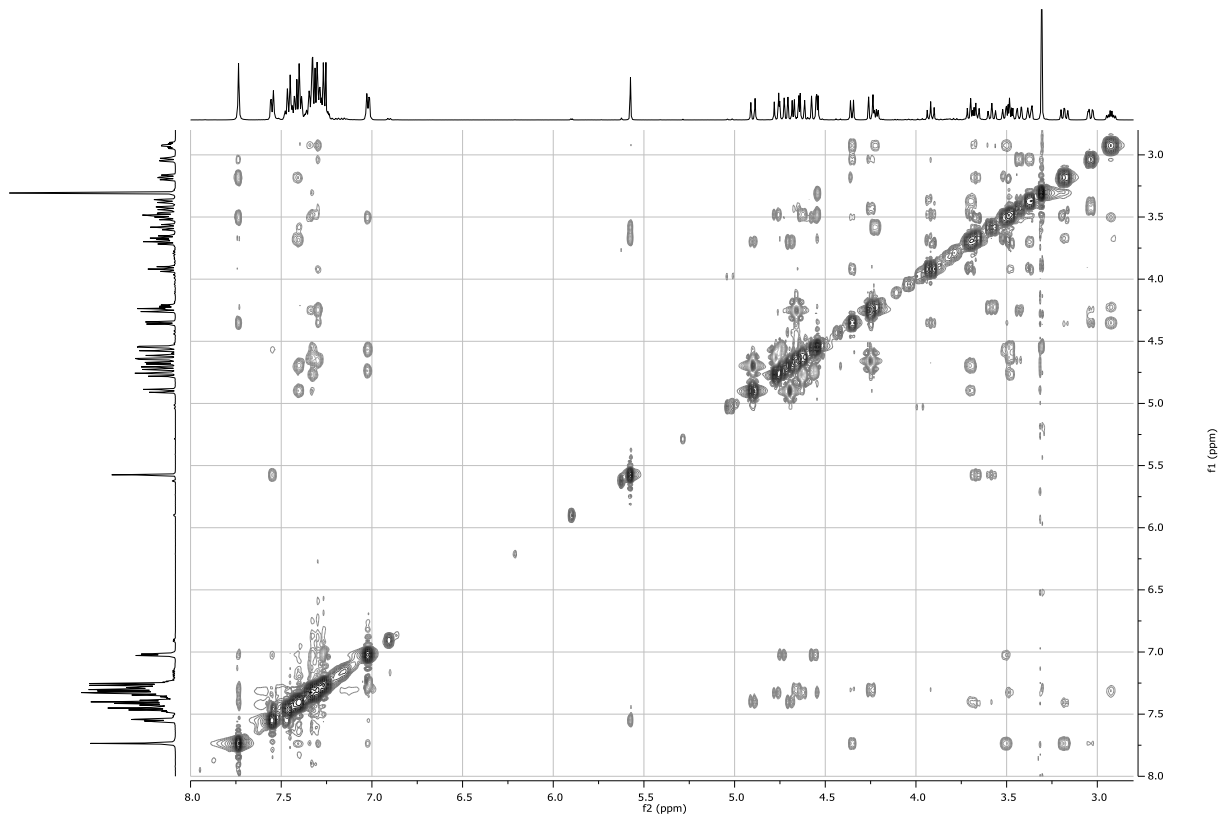

Methyl (Methyl 4-*O*-[3-*O*-benzyl-4,6-*O*-benzylidene-2-deoxy-2-(3,5-dinitro-4-pyridone)- $\alpha$ - $\beta$ -D-glucopyranosyl]-2,3-di-*O*-benzyl- $\alpha$ -D-glucopyranosyl uronate) (**5F**).

$^1\text{H}$  NMR, 500 MHz,  $\text{CDCl}_3$

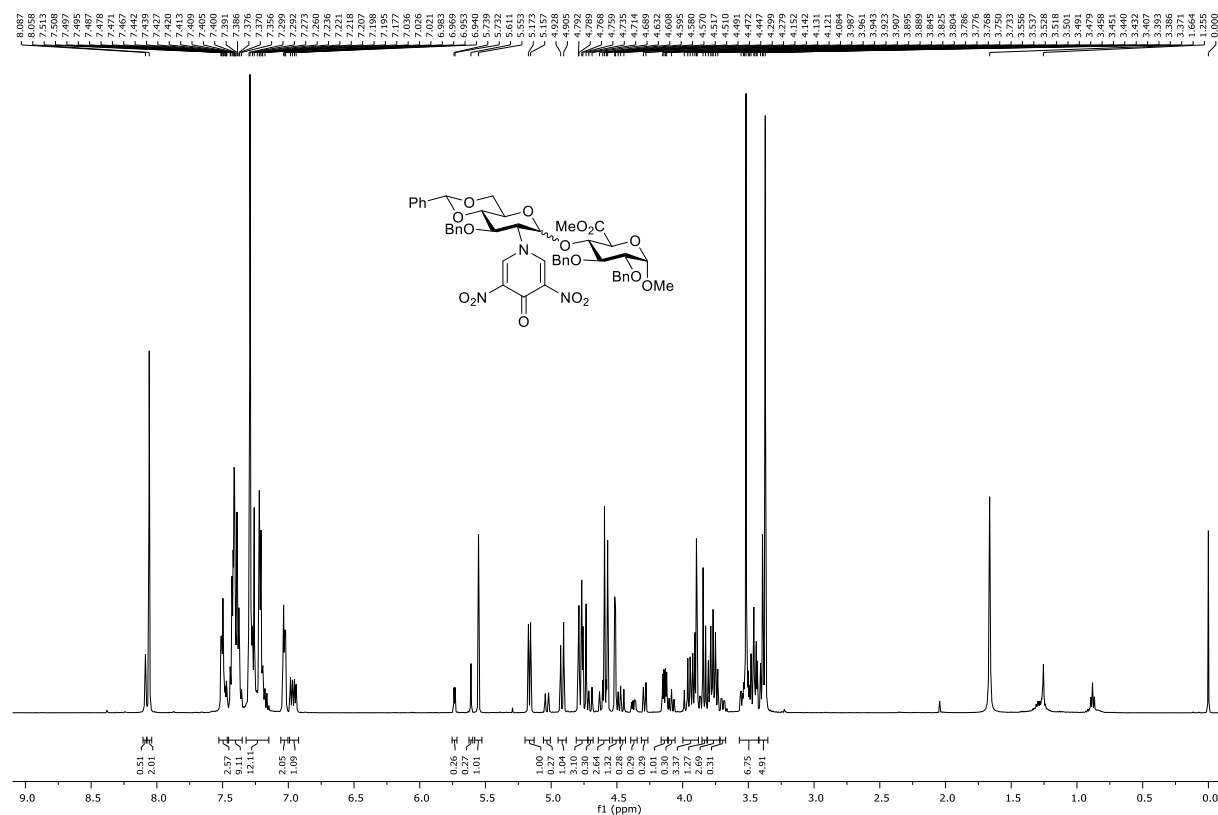

$^{13}\text{C}$ -APT NMR, 126 MHz,  $\text{CDCl}_3$

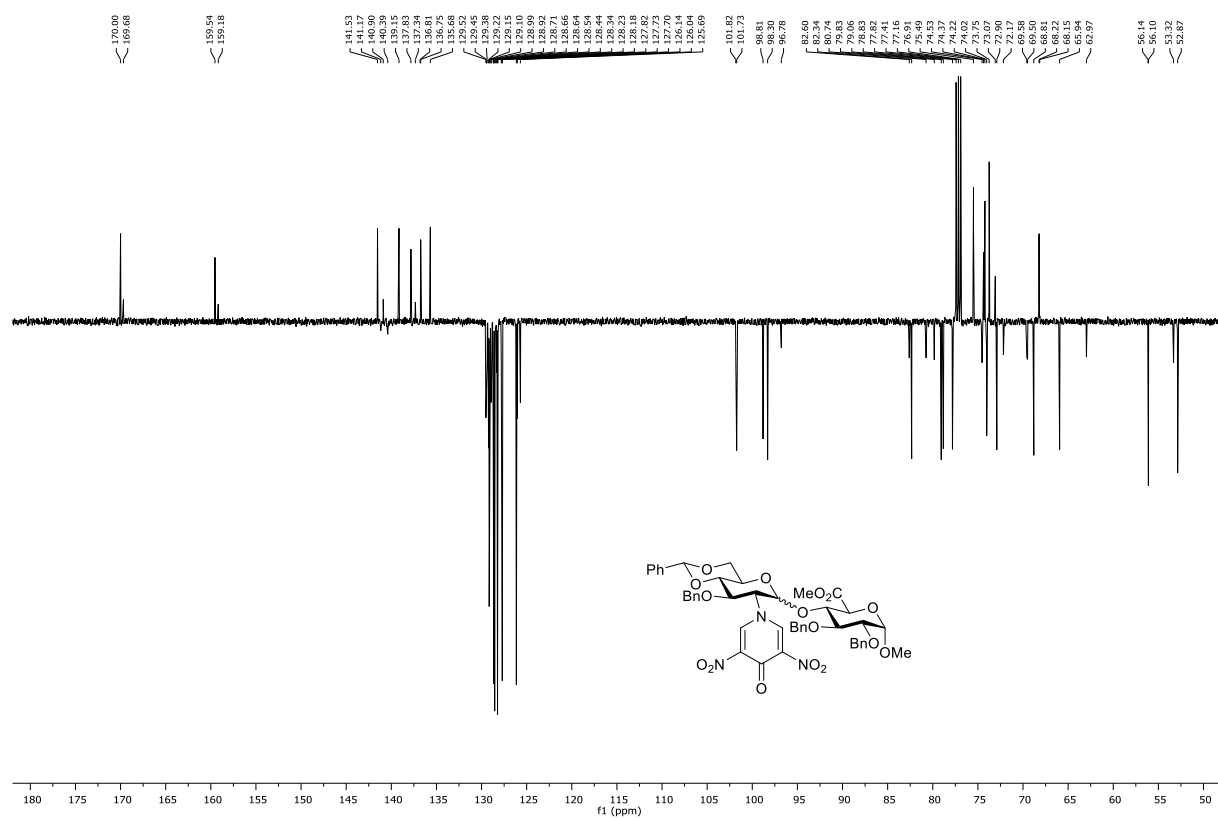

$^1\text{H}$ - $^1\text{H}$  COSY NMR,  $\text{CDCl}_3$

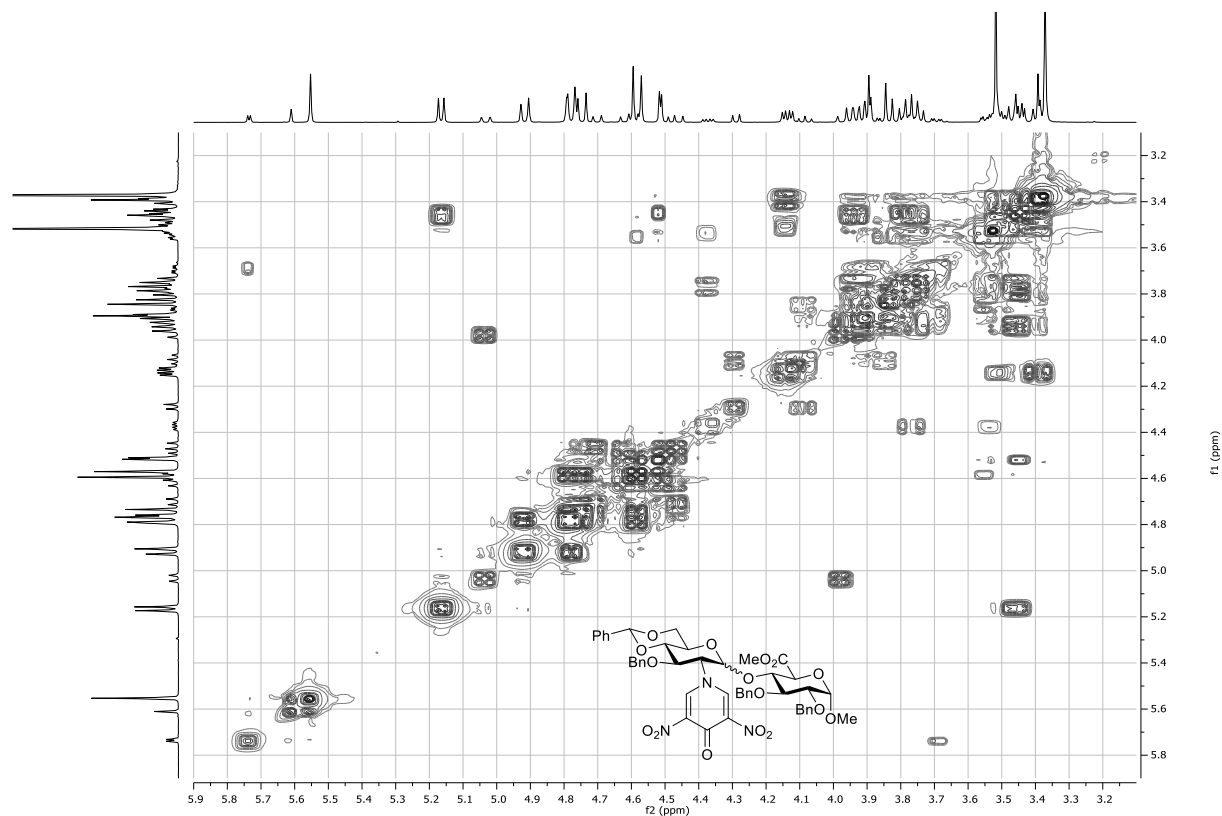

$^1\text{H}$ - $^{13}\text{C}$  HSQC NMR,  $\text{CDCl}_3$

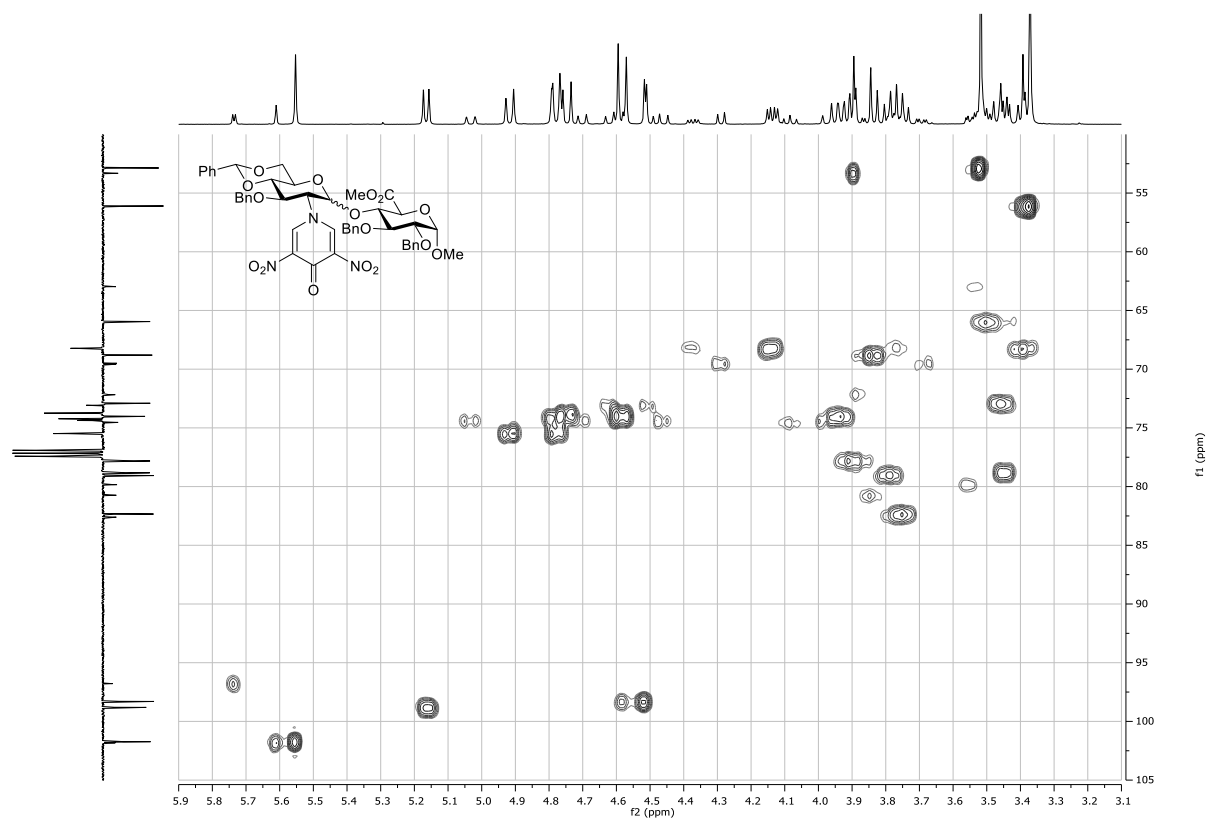

$^1\text{H}$ - $^{13}\text{C}$  HMBC NMR,  $\text{CDCl}_3$

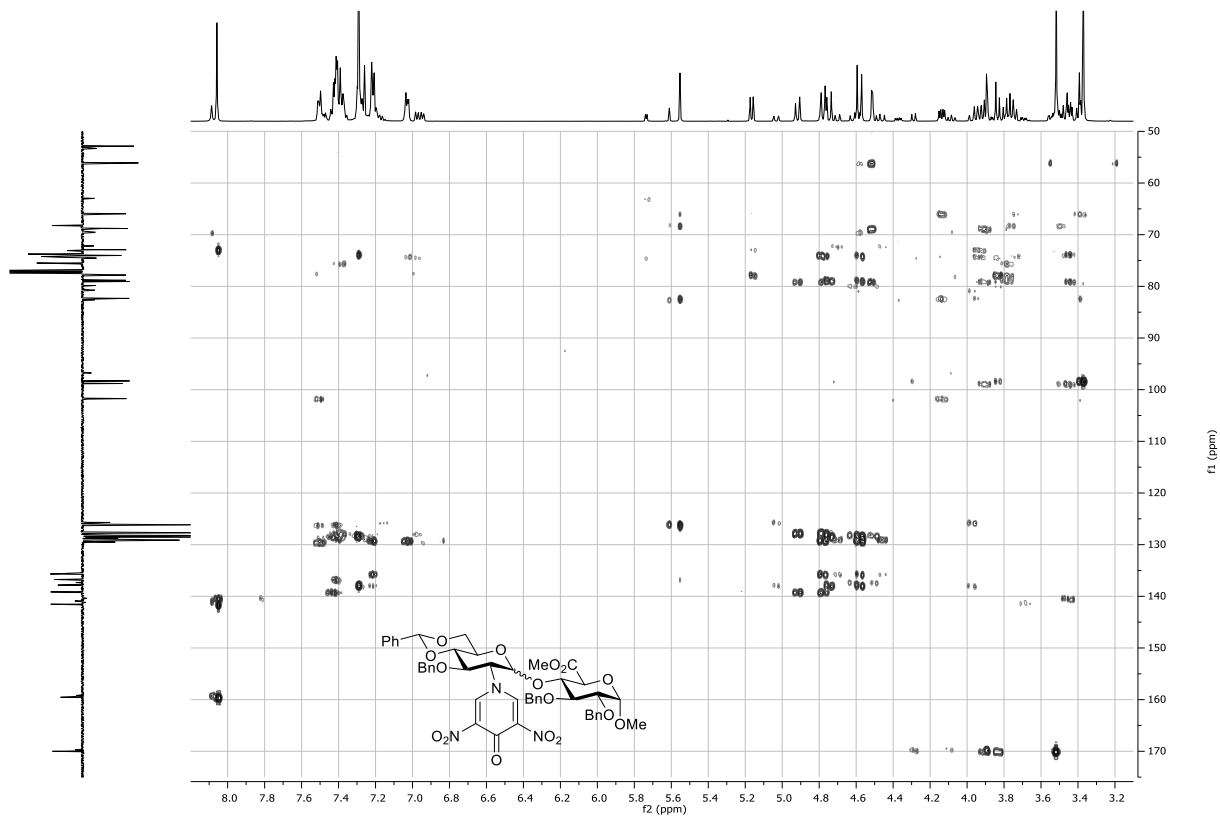

$^1\text{H}$ - $^{13}\text{C}$  HMBC-GATED NMR,  $\text{CDCl}_3$

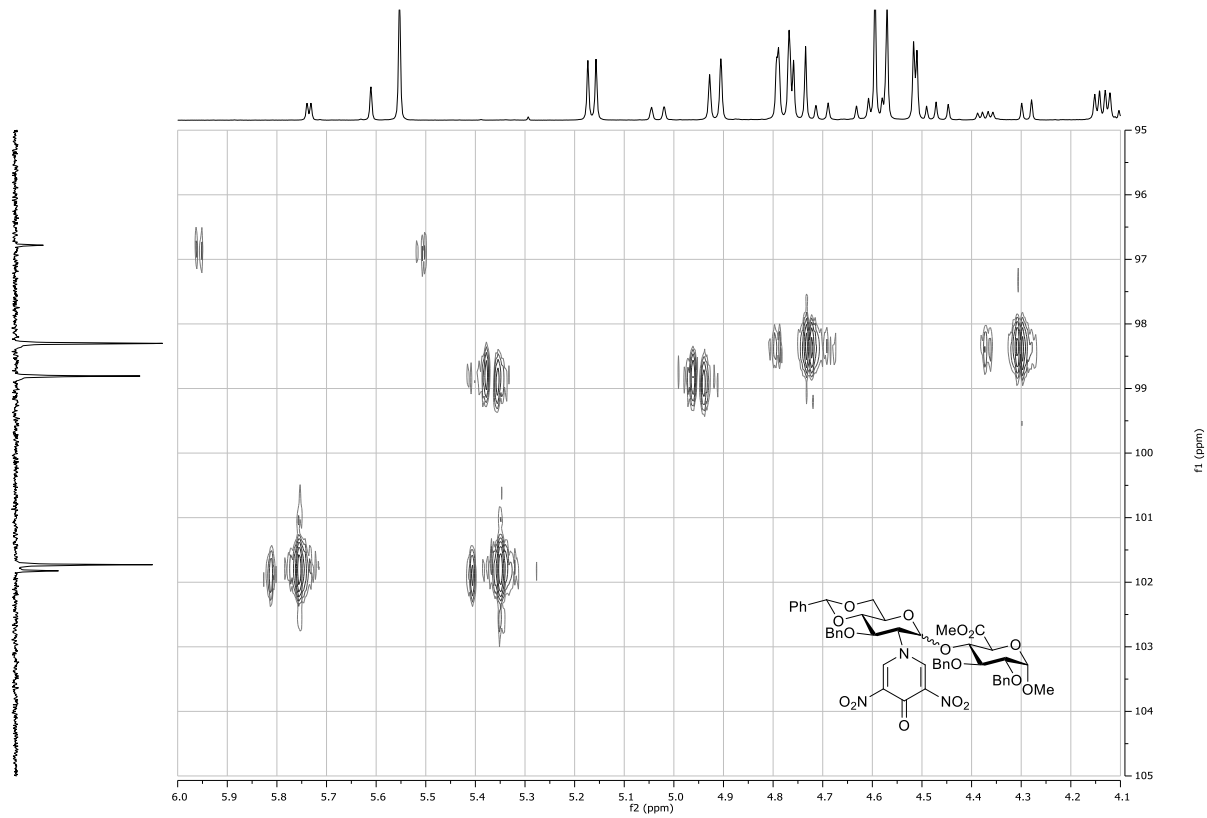

2,2-Difluoroethyl 3-*O*-benzyl-4,6-*O*-benzylidene-2-deoxy-2-(3,5-dinitro-4-pyridone)- $\alpha/\beta$ -D-glucopyranoside (**5G**).

$^1\text{H}$  NMR, 400 MHz, acetone- $d_6$

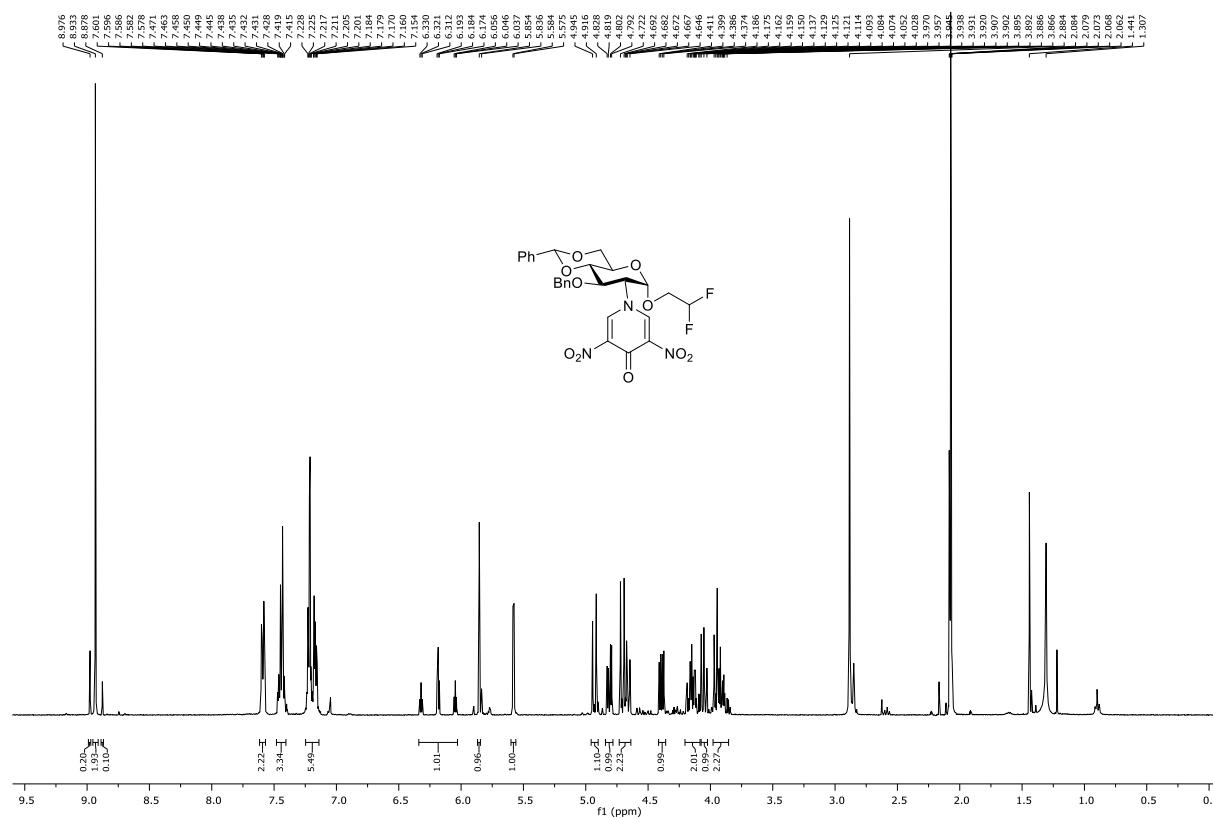

$^{13}\text{C}$ -APT NMR, 101 MHz, acetone- $d_6$

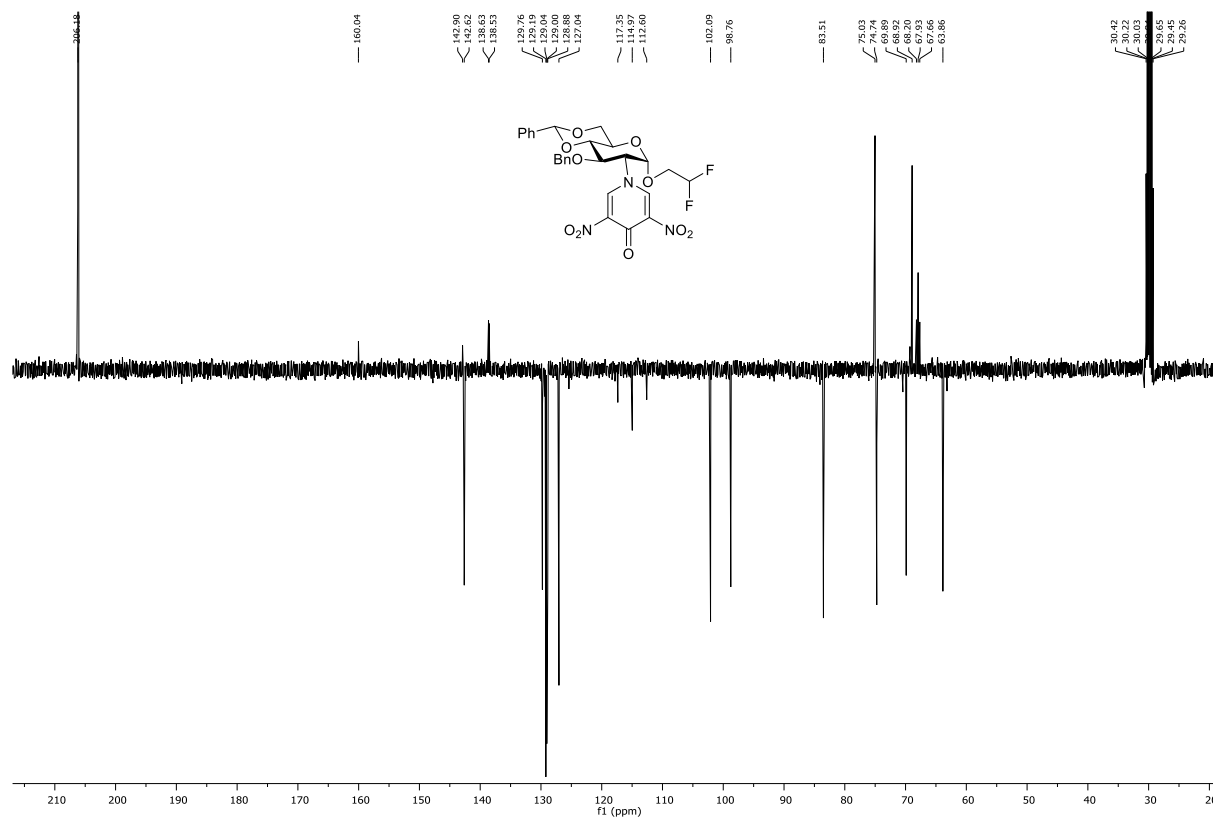

$^1\text{H}$ - $^1\text{H}$  COSY NMR, acetone- $d_6$

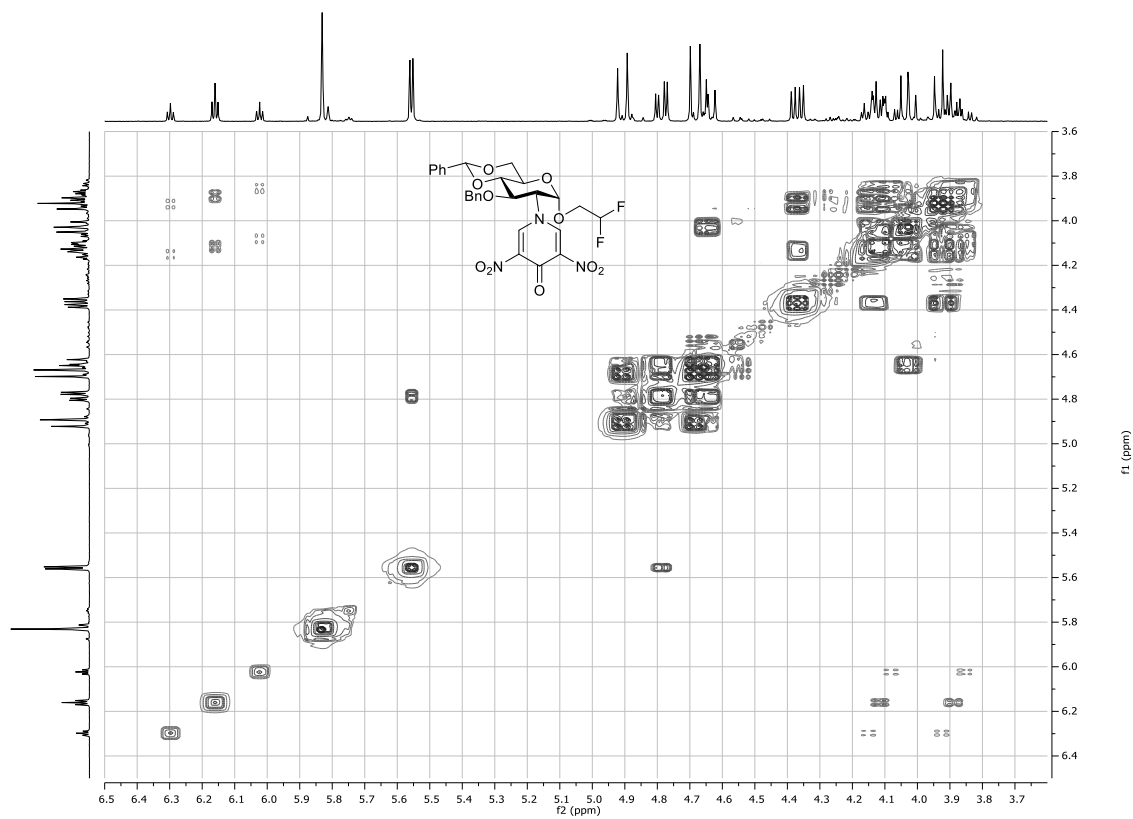

$^1\text{H}$ - $^{13}\text{C}$  HSQC NMR, acetone- $d_6$

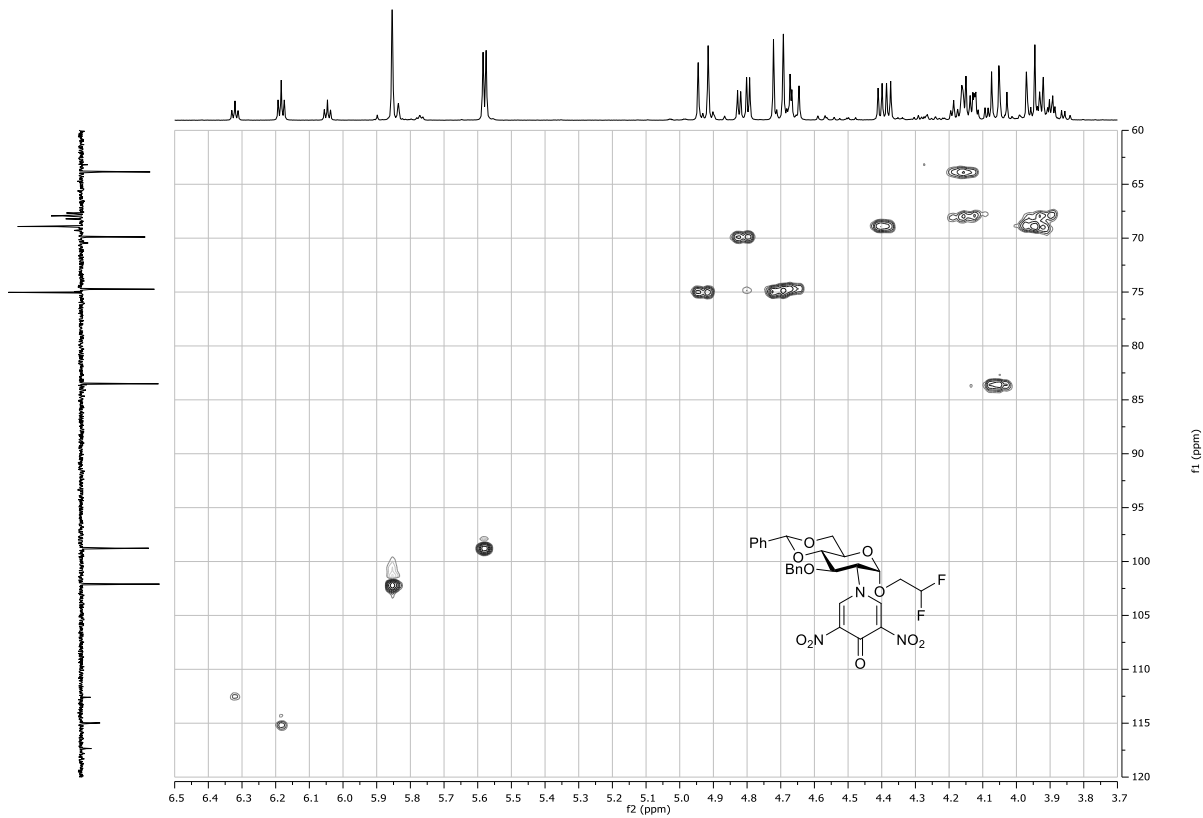

<sup>1</sup>H NMR, 400 MHz, CDCl<sub>3</sub>

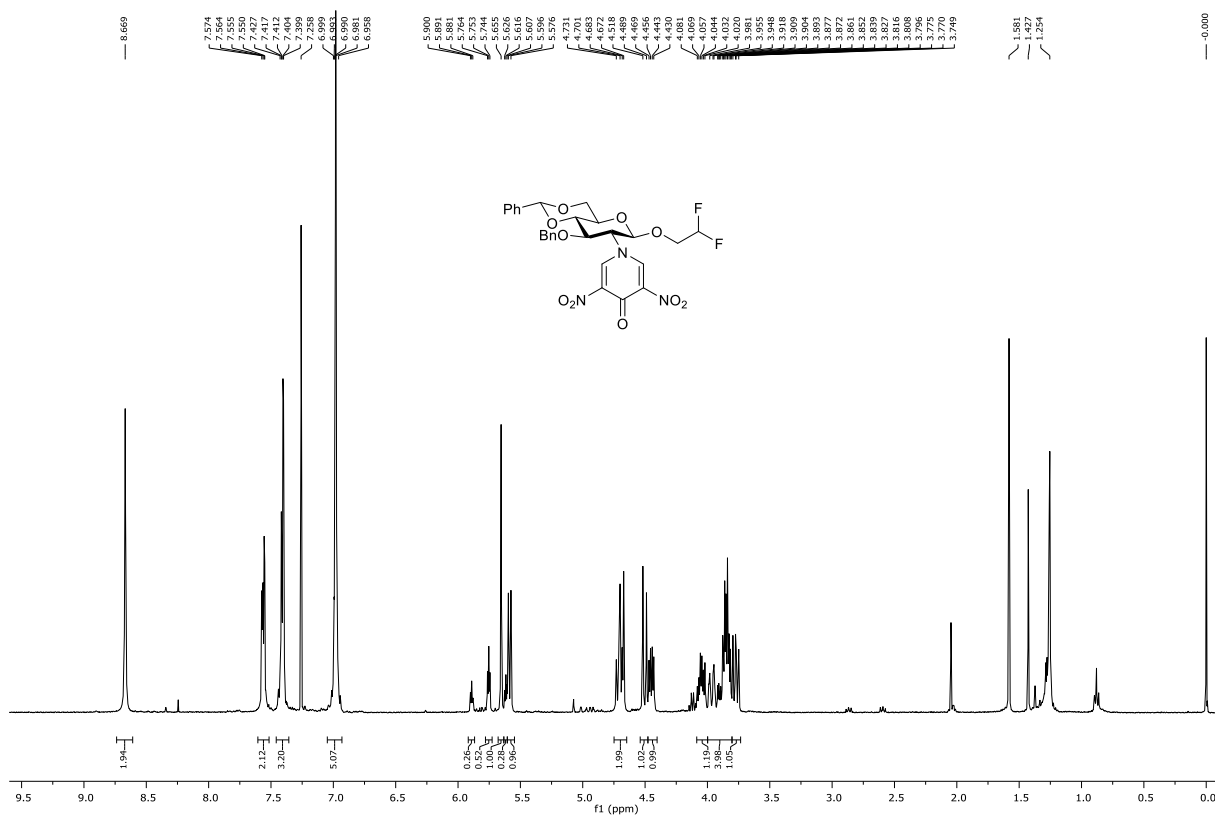

<sup>13</sup>C-APT NMR, 101 MHz, CDCl<sub>3</sub>

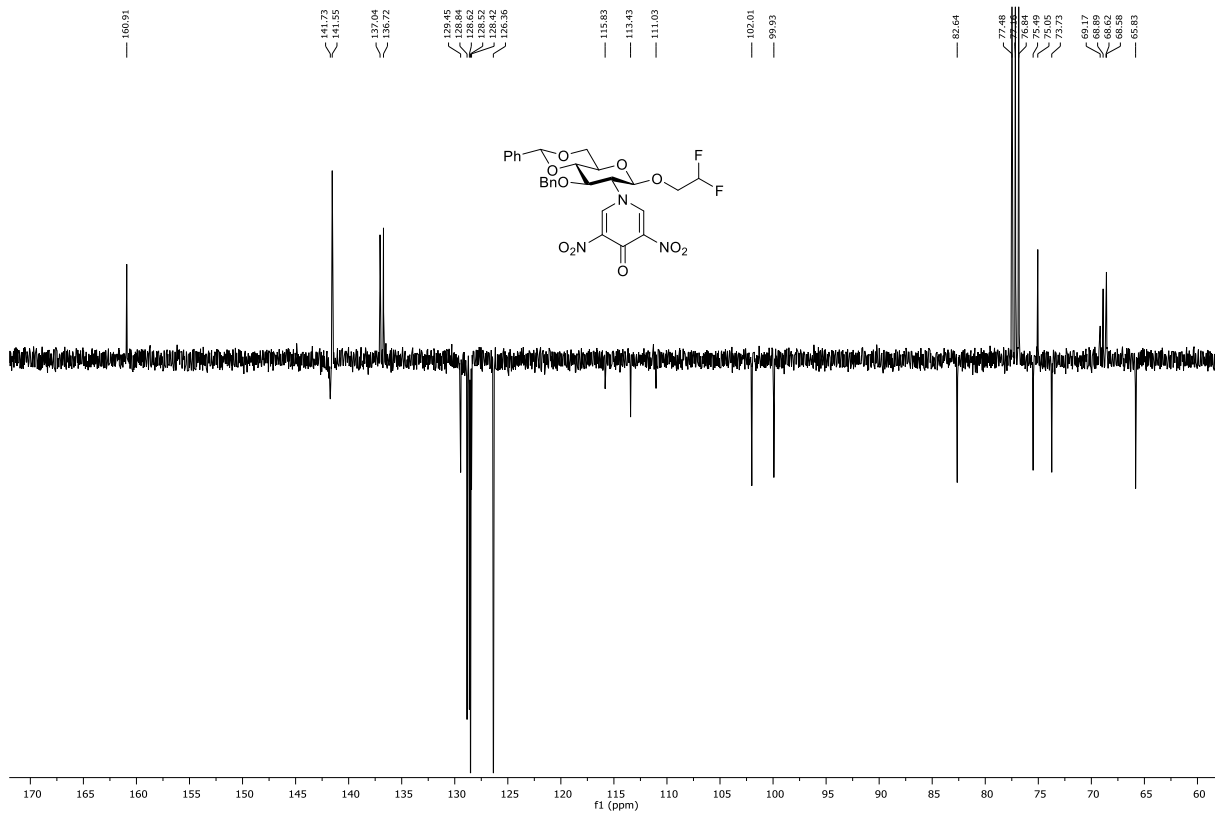



$^1\text{H}$ - $^1\text{H}$  COSY NMR,  $\text{CDCl}_3$

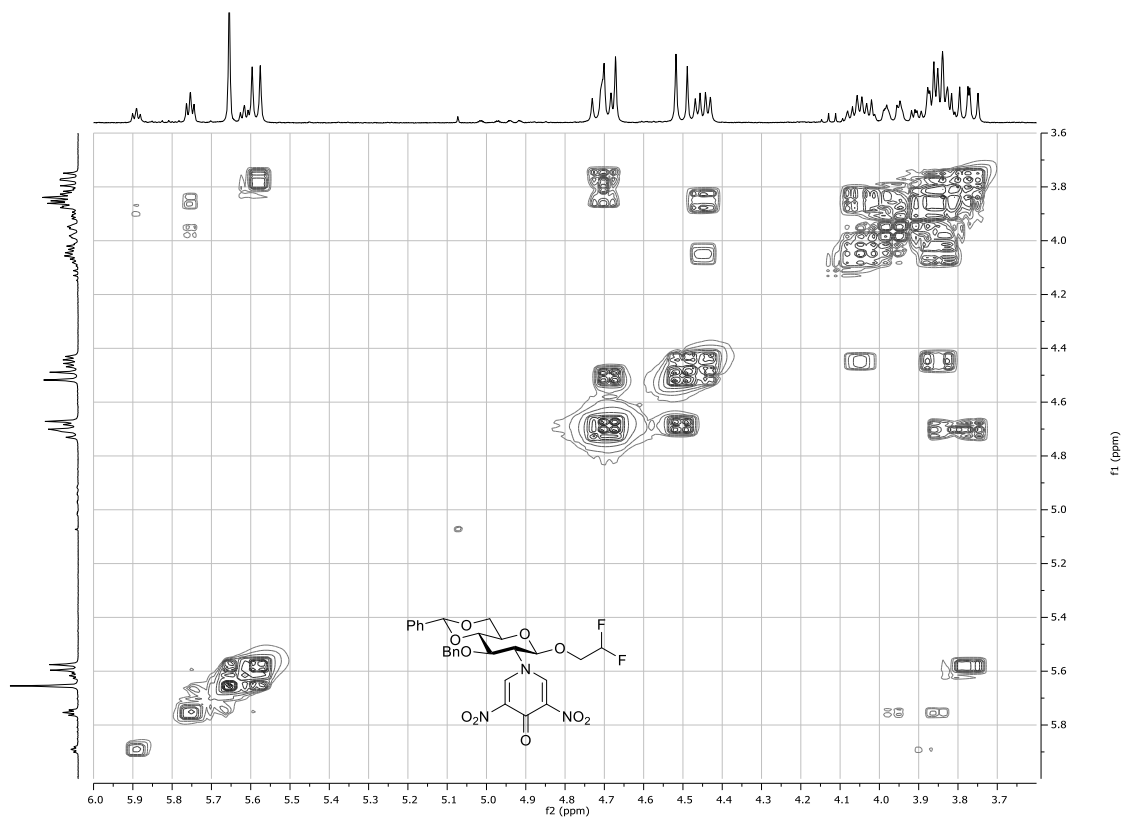

$^1\text{H}$ - $^{13}\text{C}$  HSQC NMR,  $\text{CDCl}_3$

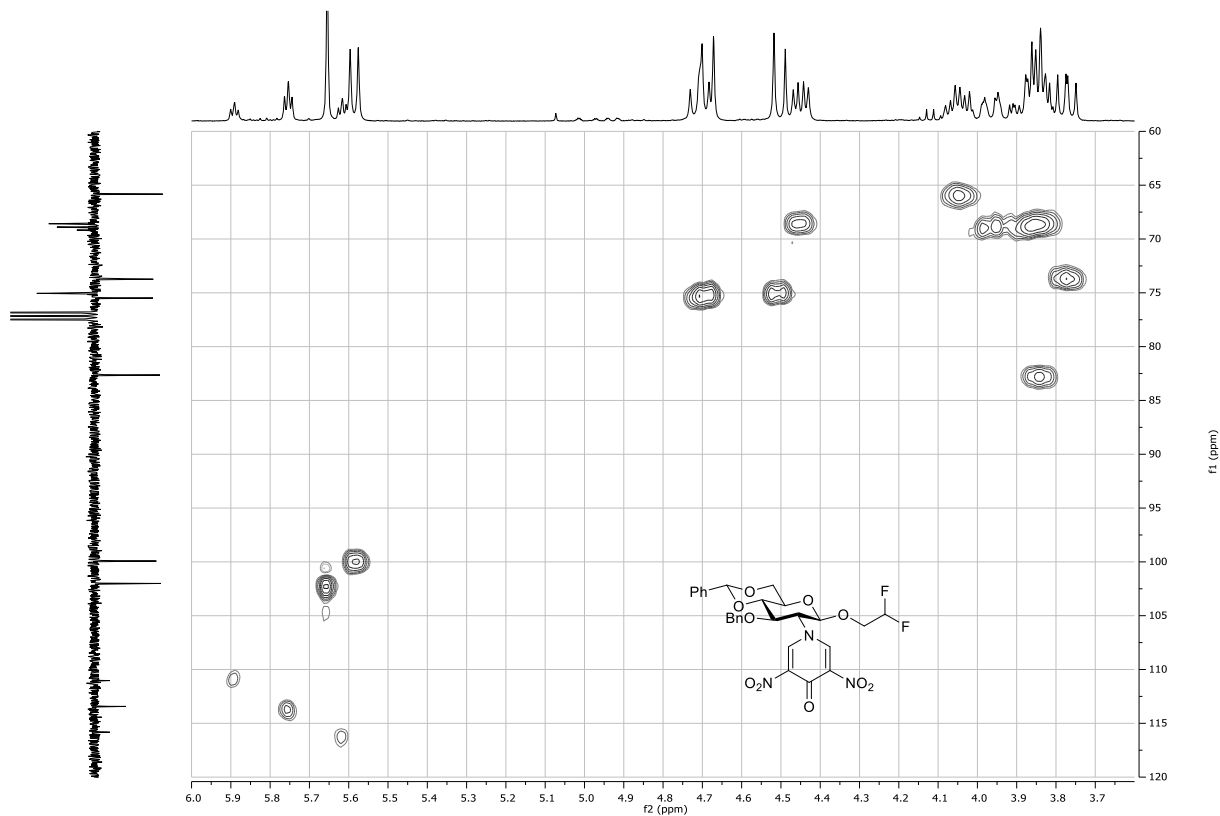

Methyl 4-*O*-(3-*O*-benzyl-4,6-*O*-benzylidene-2-deoxy-2-(3,5-dinitro-4-pyridone)-β-D-glucopyranosyl)-2,3,6-tri-*O*-benzyl-β-D-galactopyranoside (**5H**).

<sup>1</sup>H NMR, 400 MHz, CDCl<sub>3</sub>

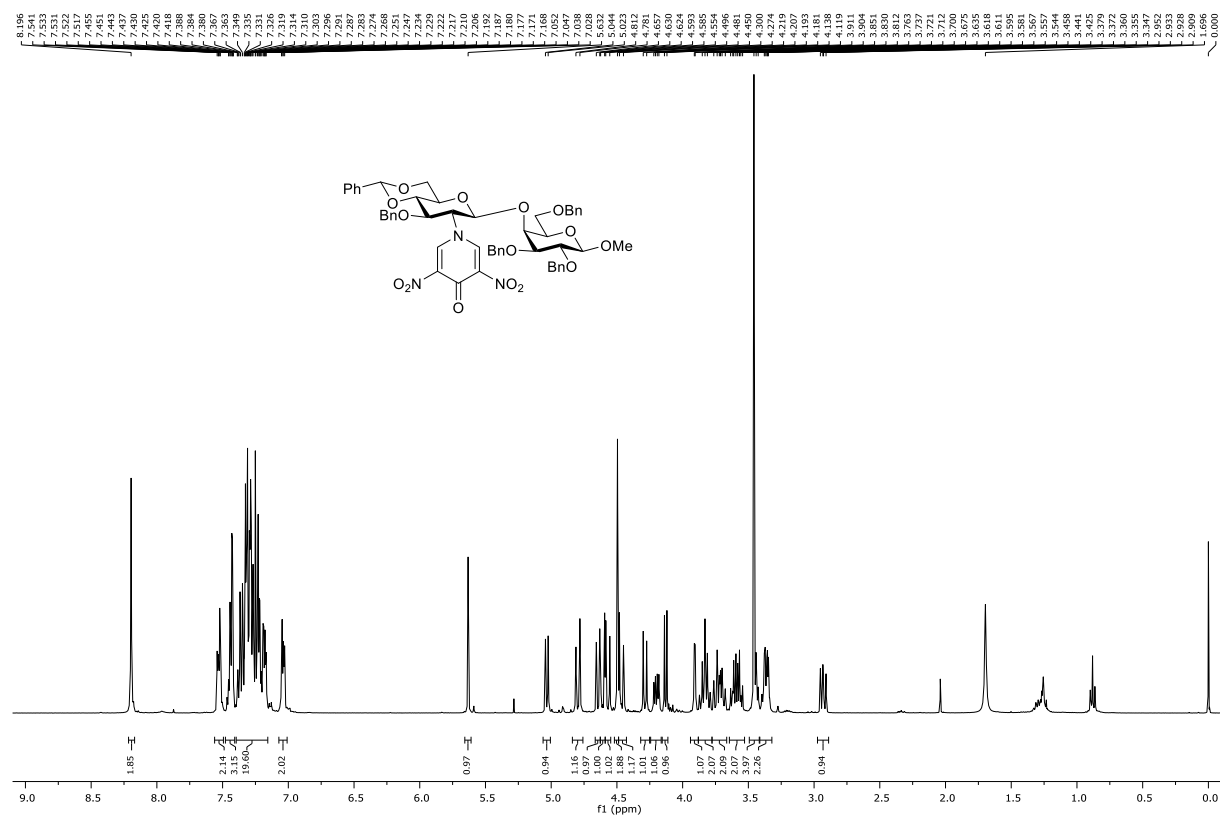

<sup>13</sup>C-APT NMR, 101 MHz, CDCl<sub>3</sub>

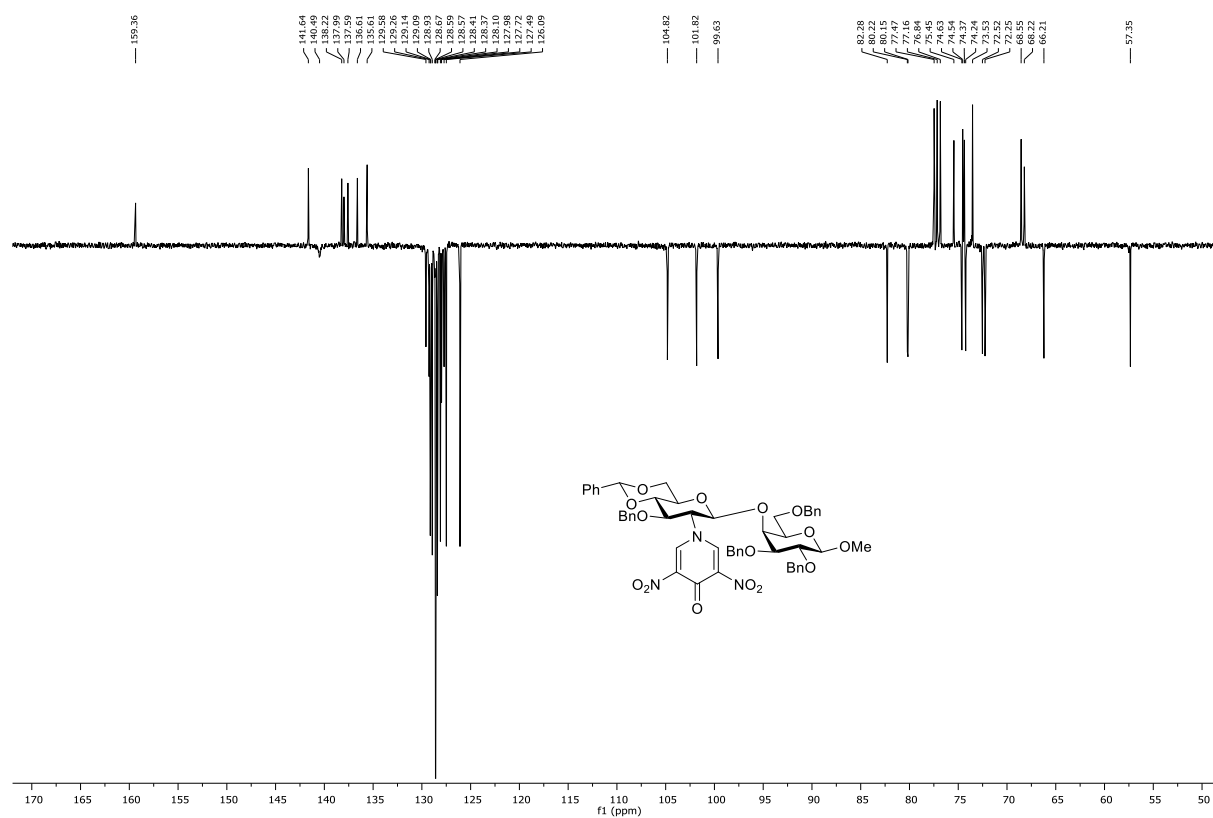

$^1\text{H}$ - $^1\text{H}$  COSY NMR,  $\text{CDCl}_3$

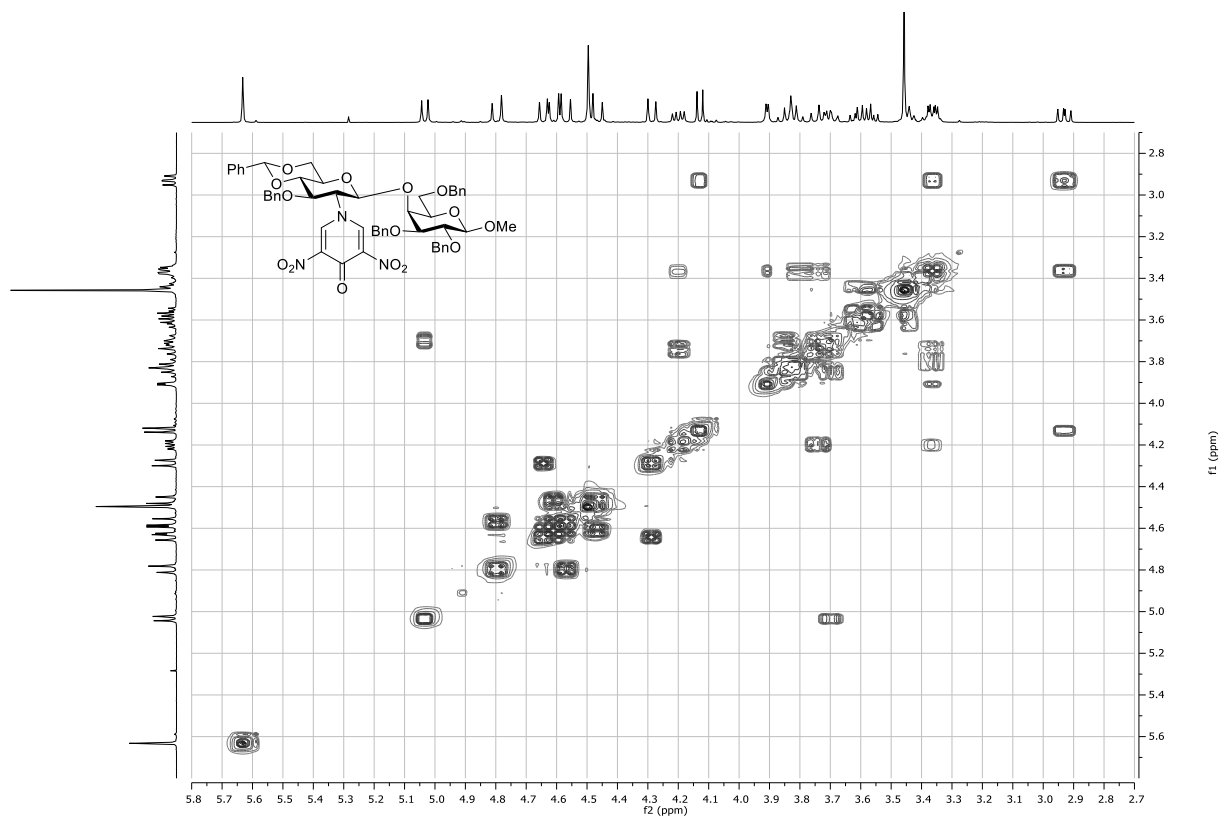

$^1\text{H}$ - $^{13}\text{C}$  HSQC NMR,  $\text{CDCl}_3$

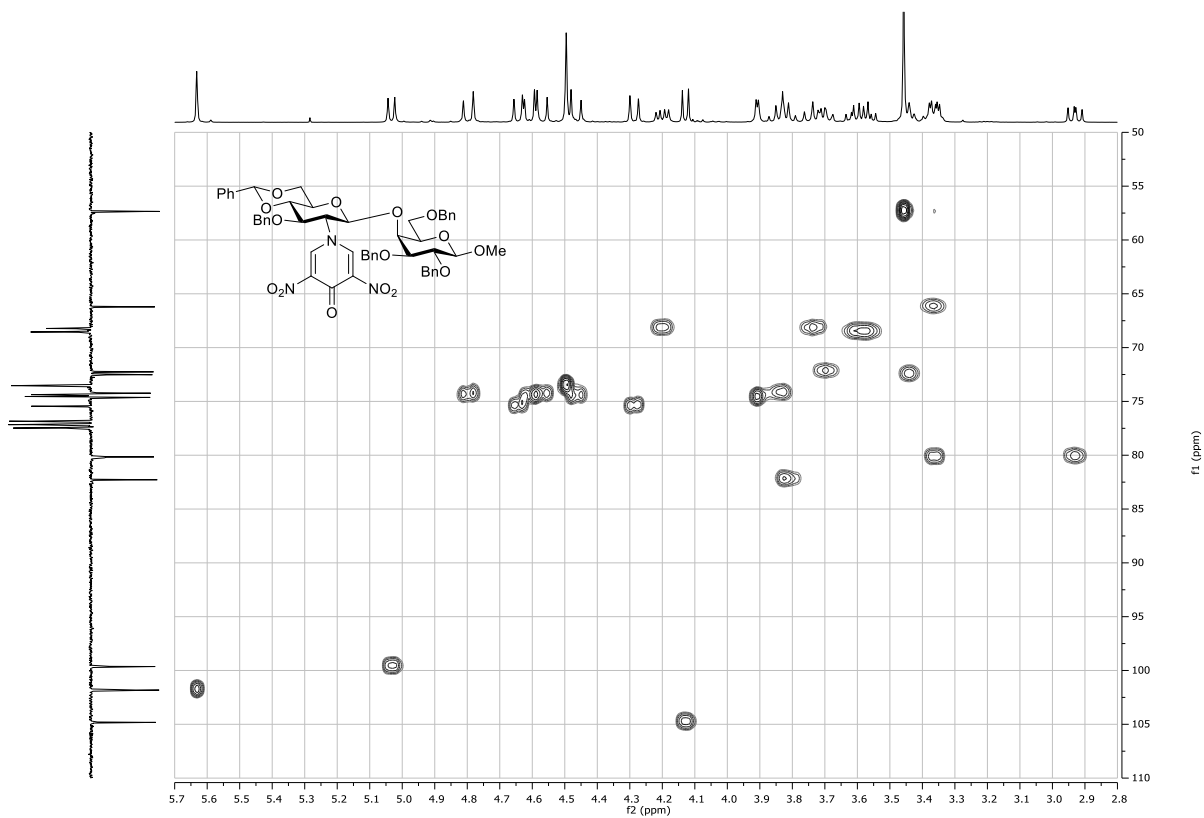

$^1\text{H}$ - $^{13}\text{C}$  HMBC NMR,  $\text{CDCl}_3$

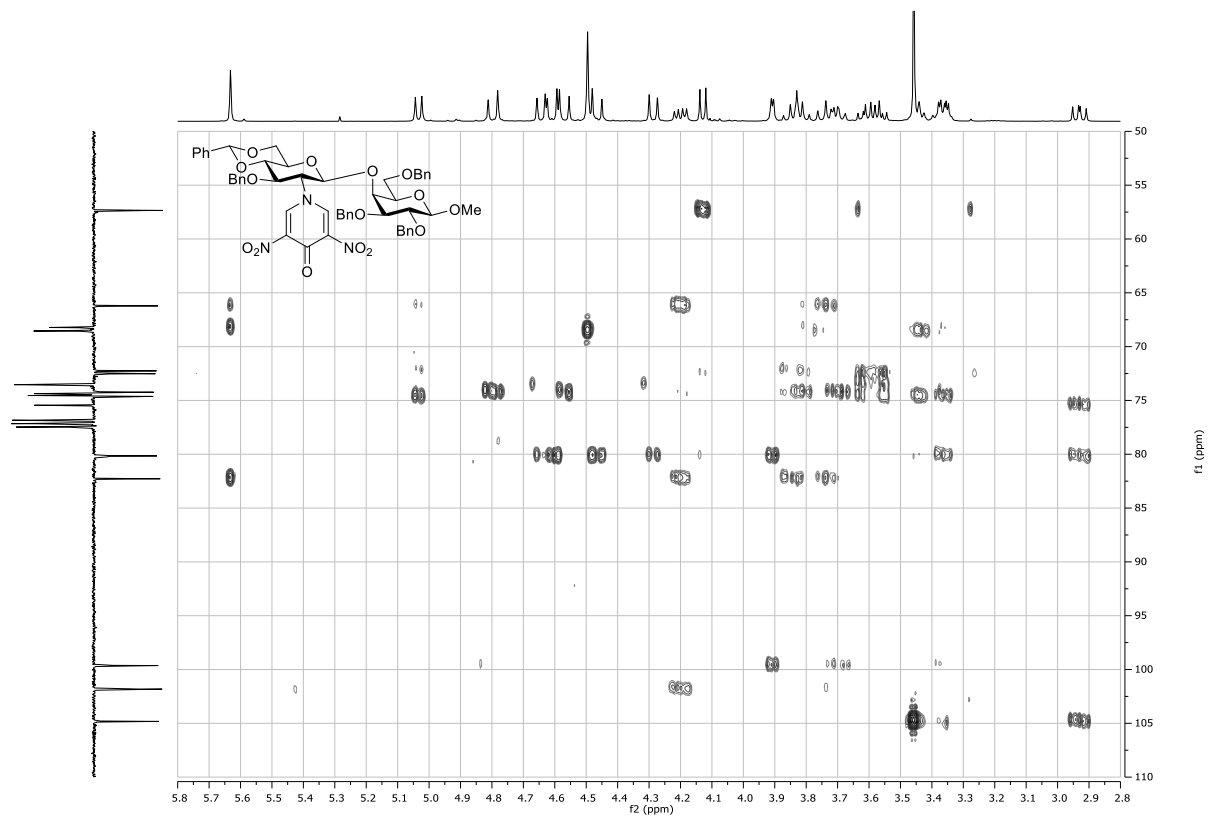

$^1\text{H}$ - $^{13}\text{C}$  HMBC-GATED NMR,  $\text{CDCl}_3$

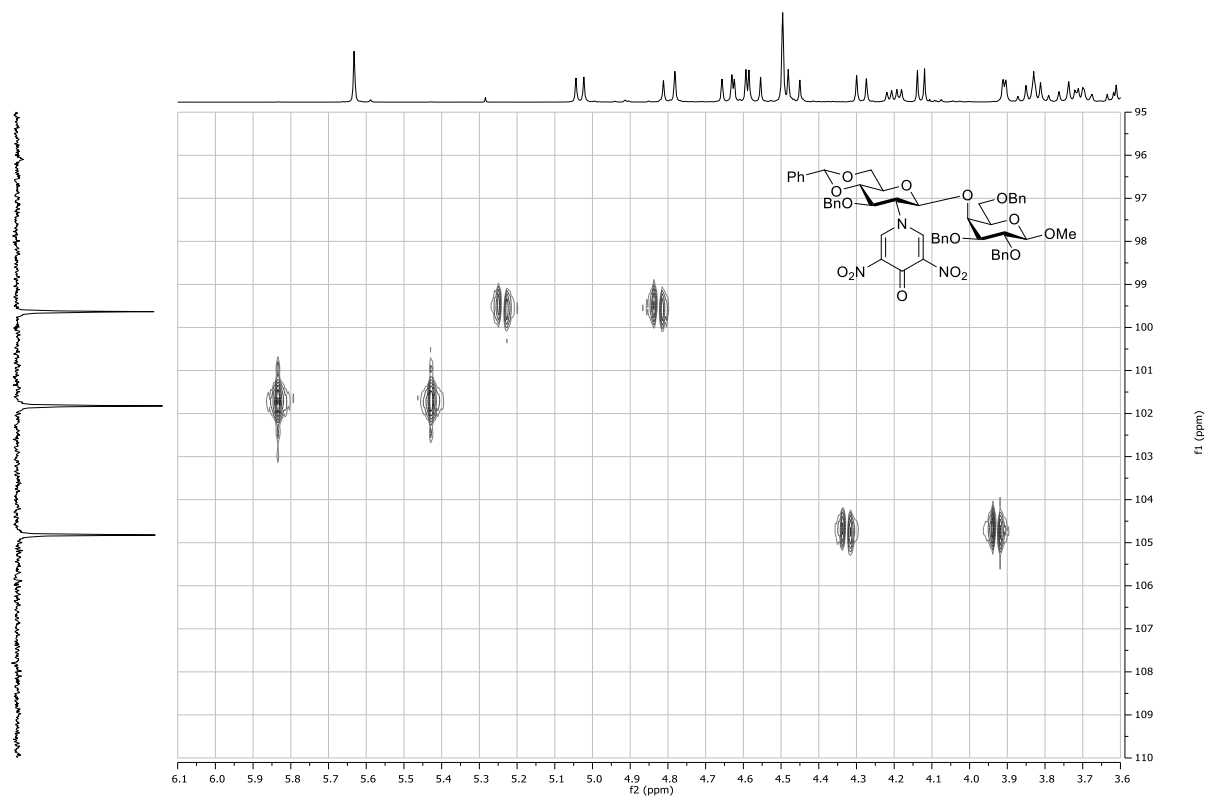

Methyl 2-*O*-(3-*O*-benzyl-4,6-*O*-benzylidene-2-deoxy-2-(3,5-dinitro-4-pyridone)- $\alpha$ - $\beta$ -D-glucopyranosyl)-3-*O*-benzyl-4,6-*O*-benzylidene- $\alpha$ -D-mannopyranoside (**51**).

$^1\text{H}$  NMR, 400 MHz,  $\text{CDCl}_3$

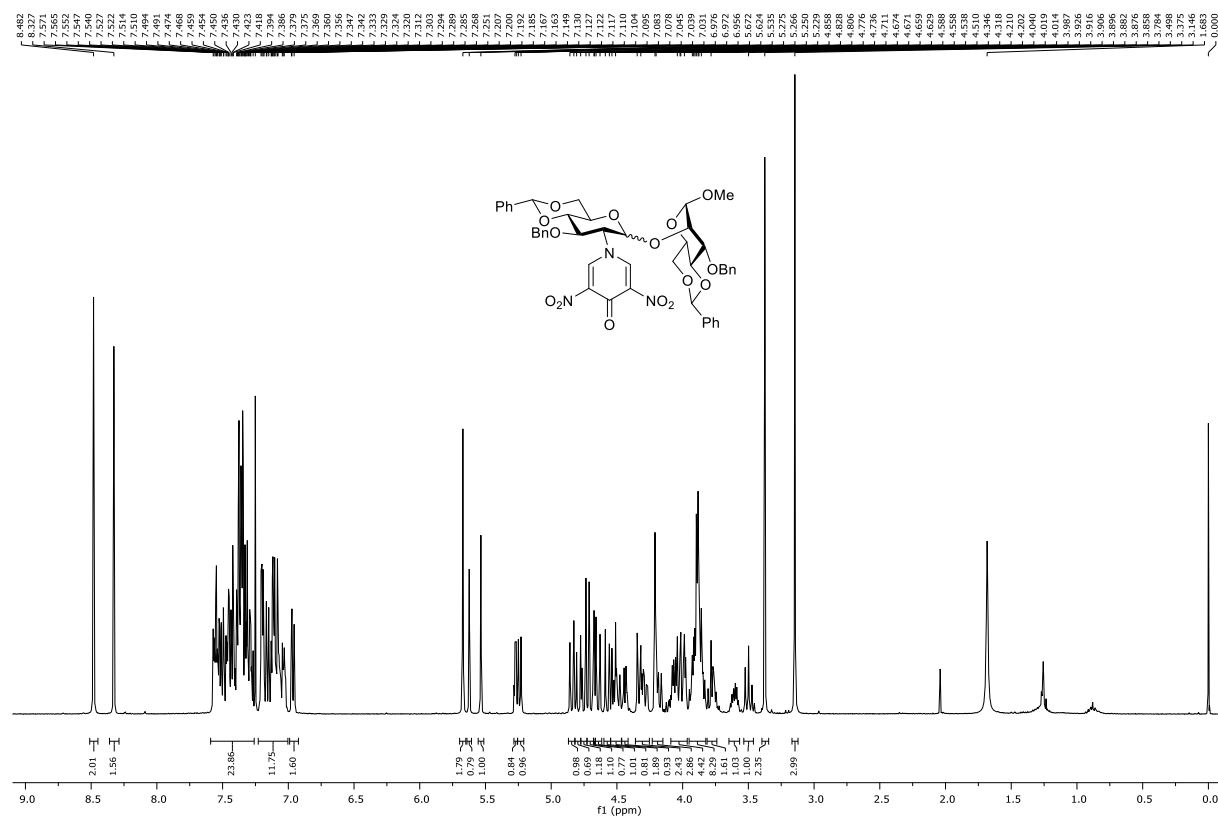

$^{13}\text{C}$ -APT NMR, 101 MHz,  $\text{CDCl}_3$

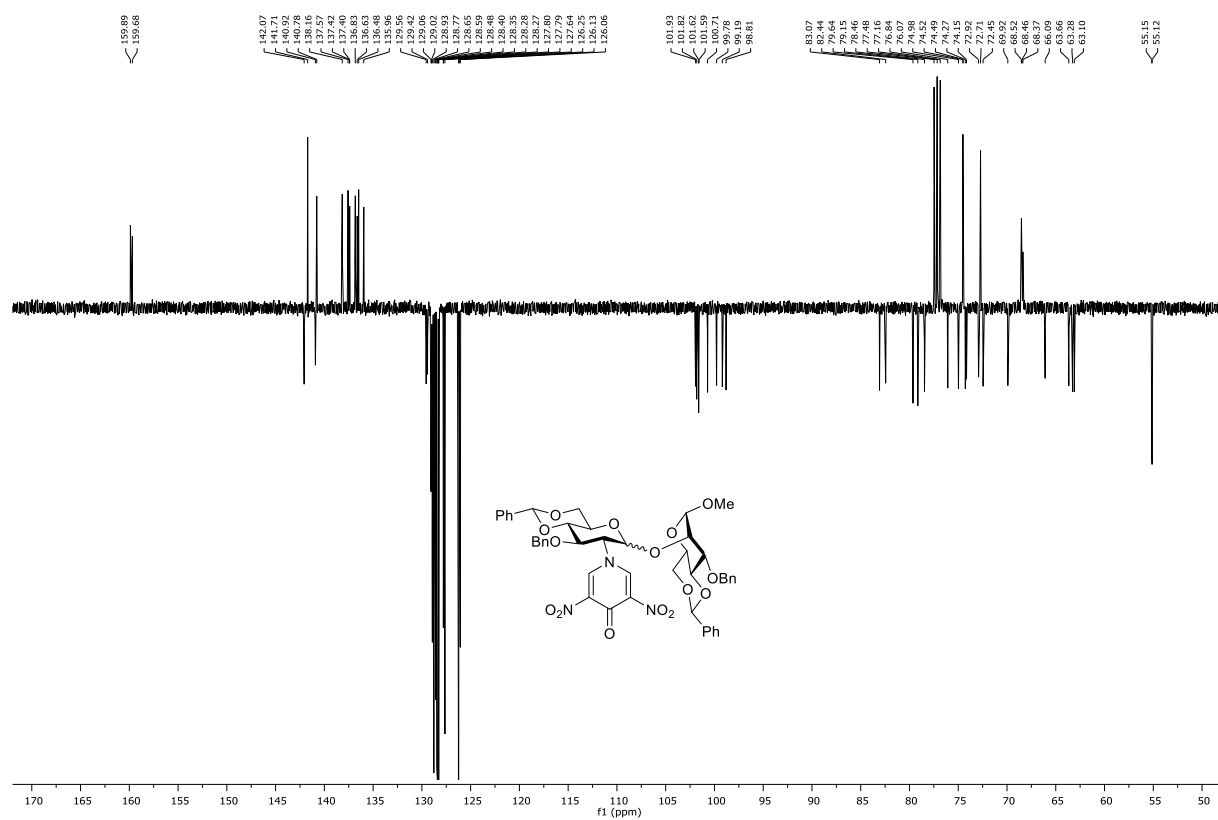

$^1\text{H}$ - $^1\text{H}$  COSY NMR,  $\text{CDCl}_3$

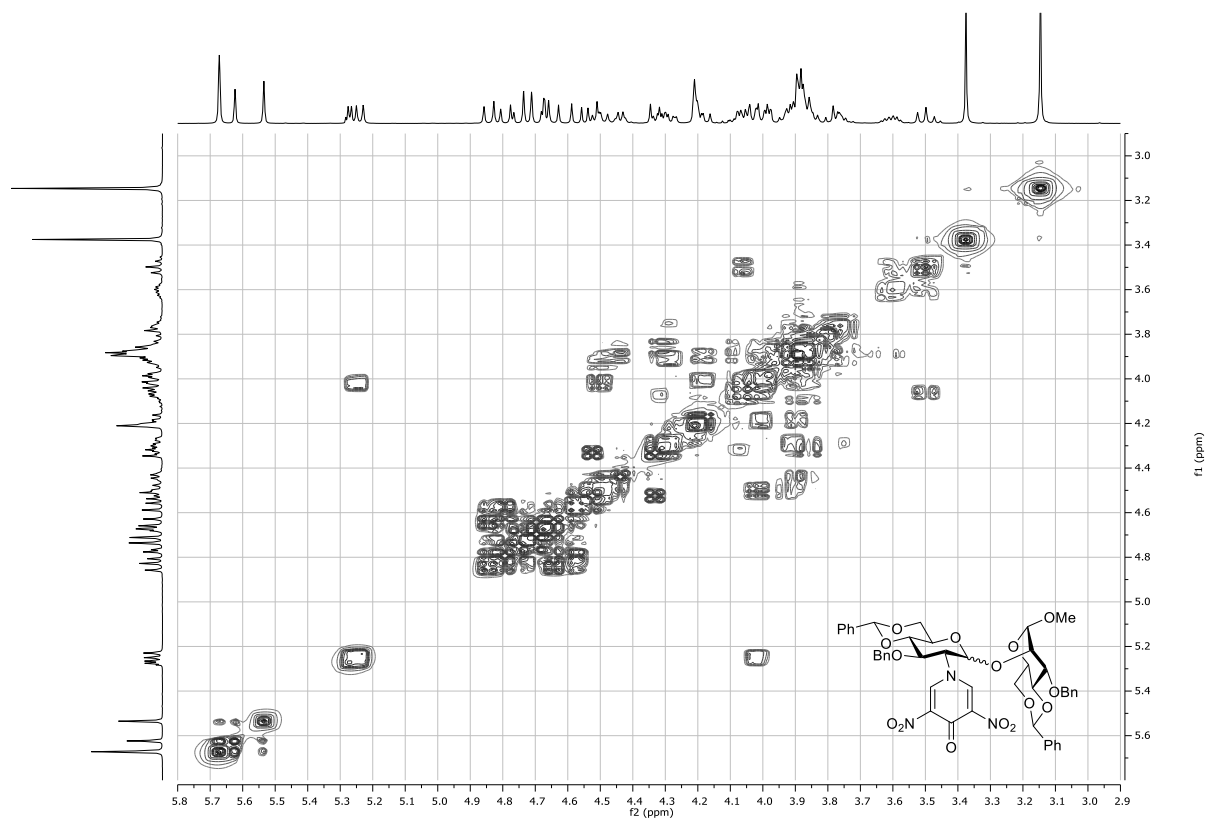

$^1\text{H}$ - $^{13}\text{C}$  HSQC NMR,  $\text{CDCl}_3$

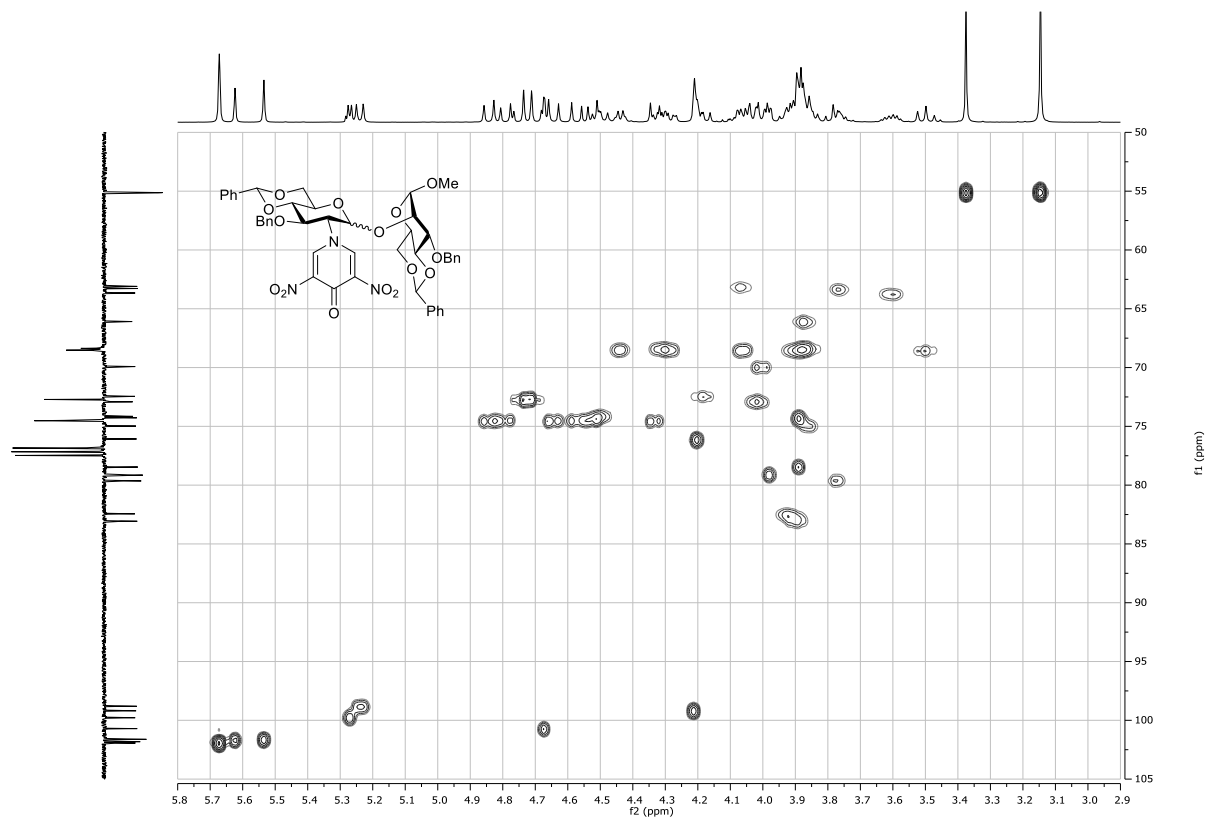

$^1\text{H}$ - $^{13}\text{C}$  HMBC NMR,  $\text{CDCl}_3$

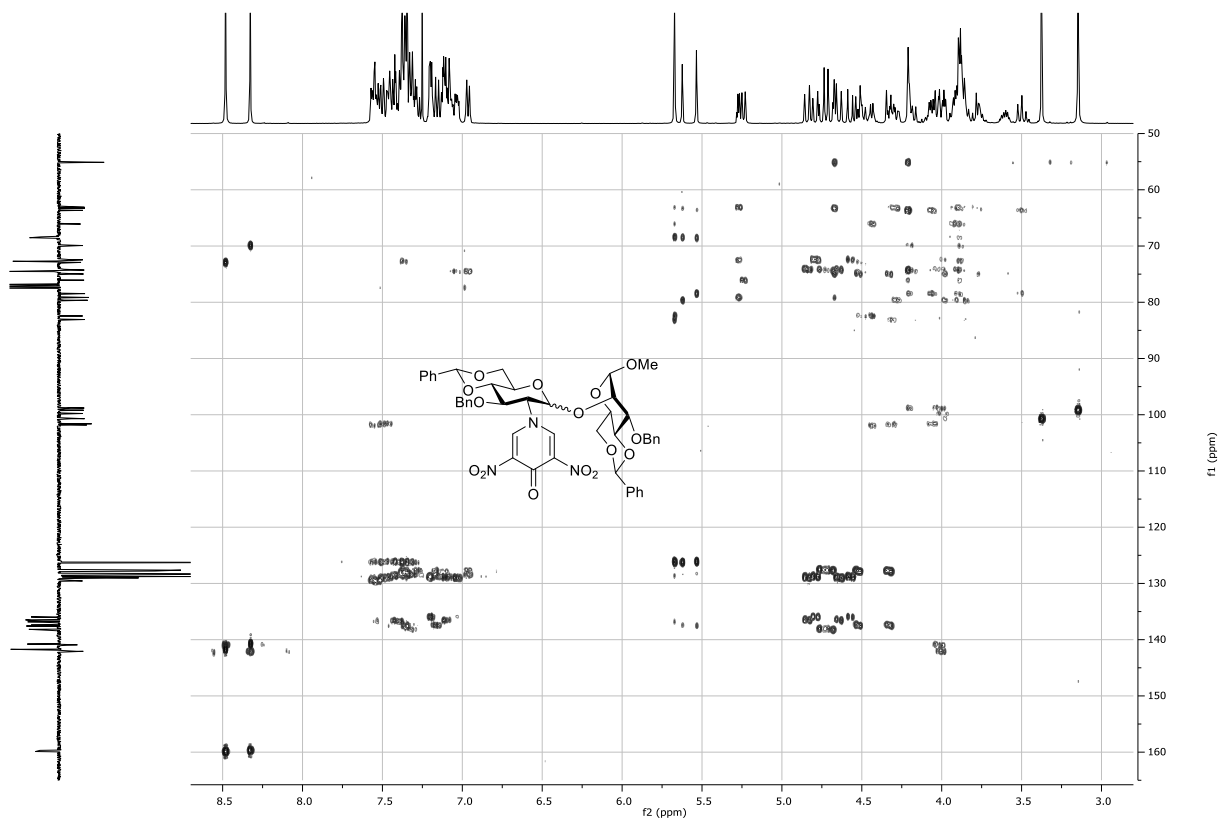

$^1\text{H}$ - $^{13}\text{C}$  HMBC-GATED NMR,  $\text{CDCl}_3$

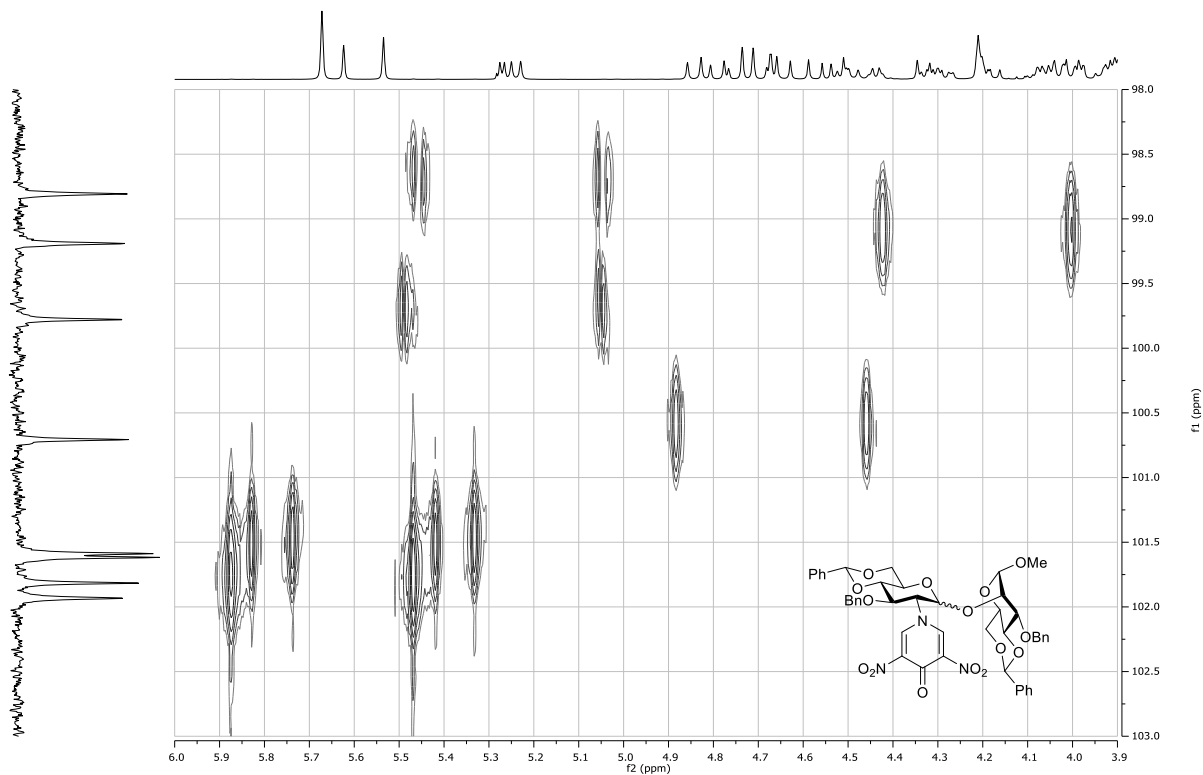

2,2,2-Trifluoroethyl 3-*O*-benzyl-4,6-*O*-benzylidene-2-deoxy-2-(3,5-dinitro-4-pyridone)- $\alpha/\beta$ -D-glucopyranoside (**5J**).

$^1\text{H}$  NMR, 400 MHz, acetone- $d_6$

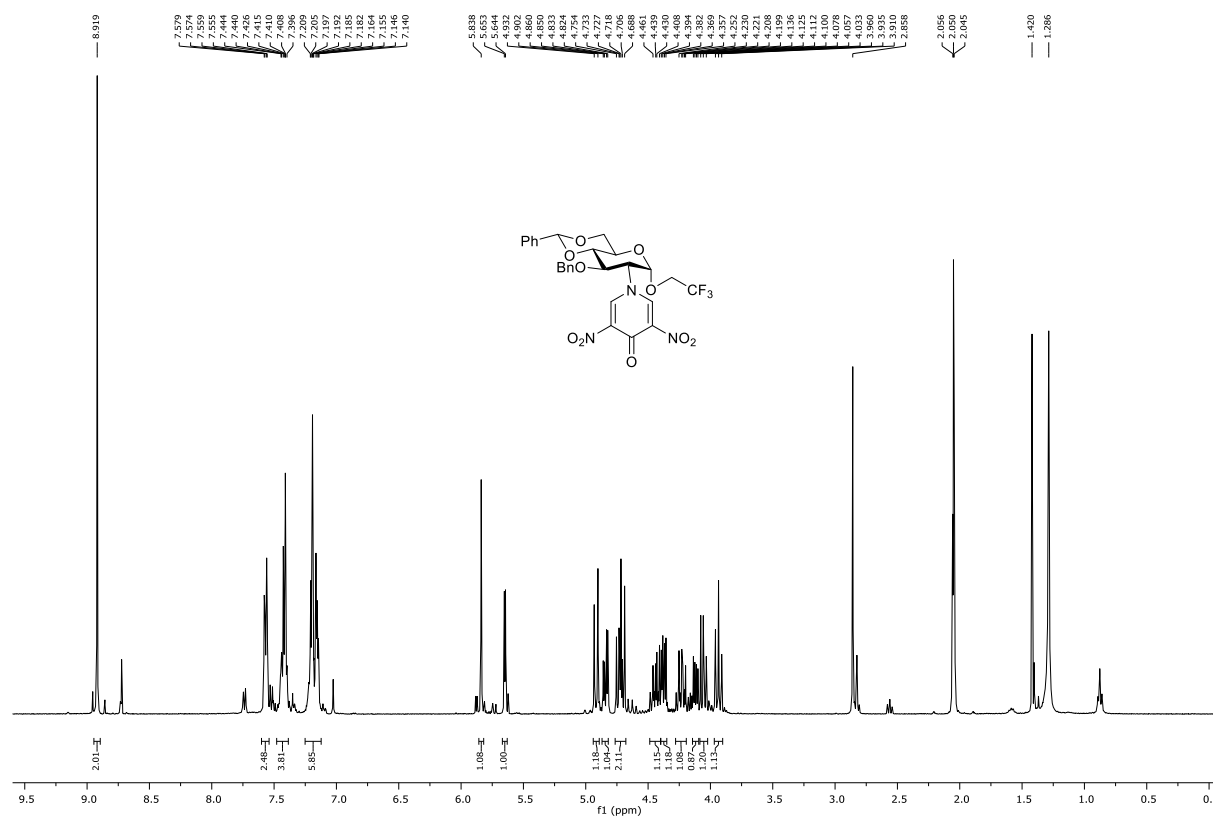

$^1\text{H}$  NMR, 400 MHz,  $\text{CDCl}_3$

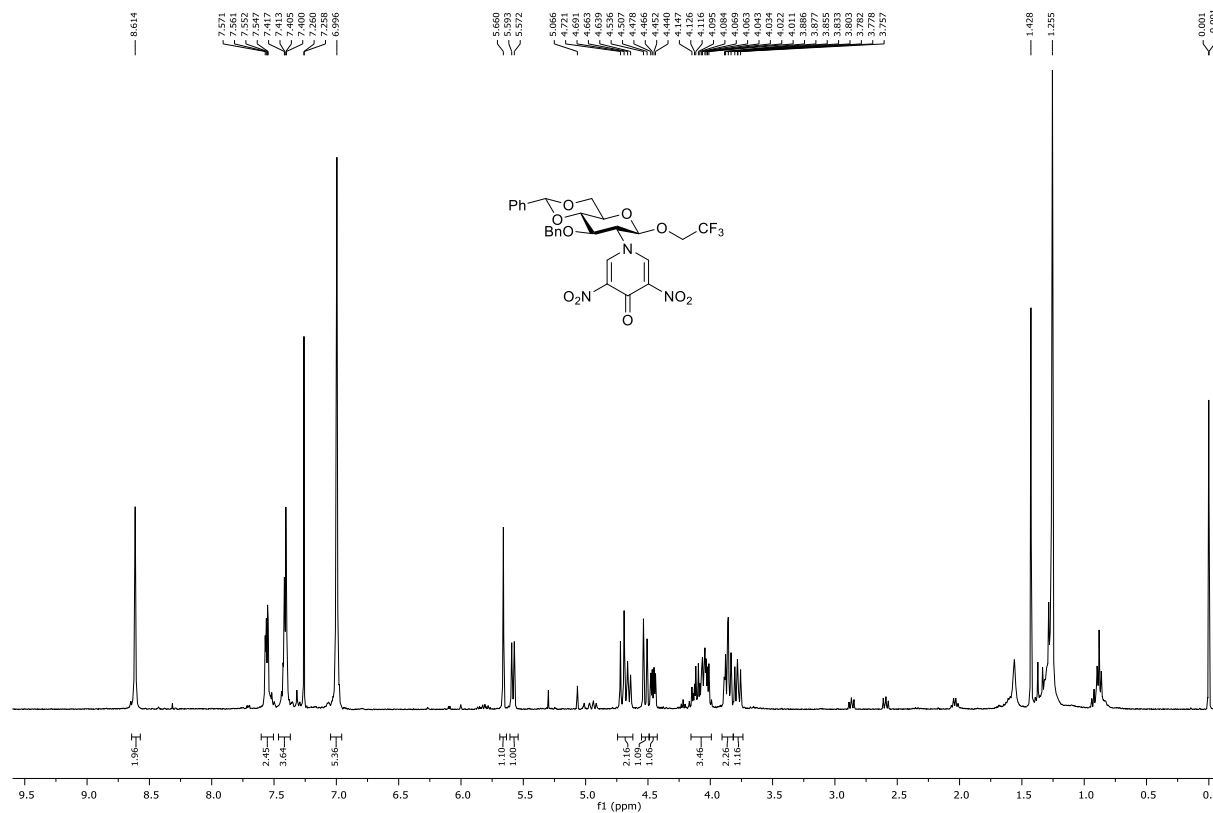



$^{13}\text{C}$ -APT NMR, 101 MHz, acetone- $d_6$

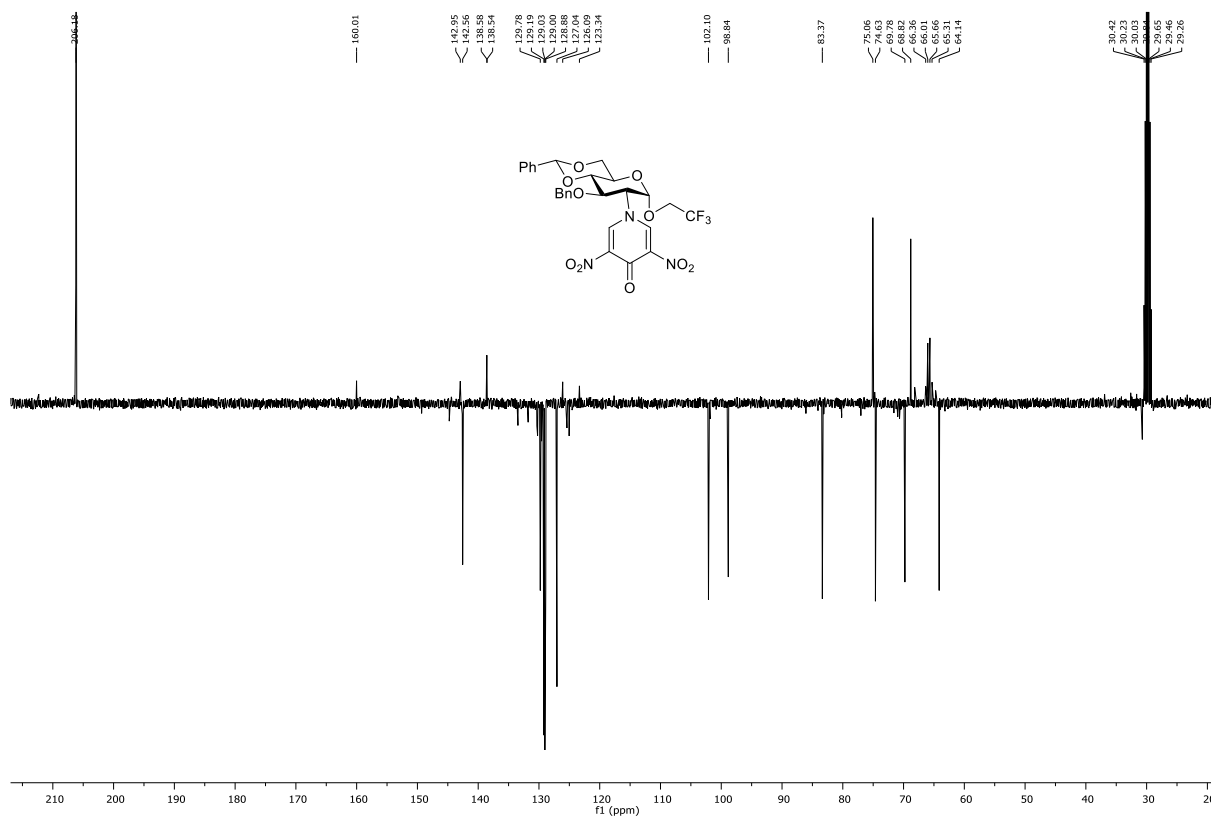

$^1\text{H}$ - $^1\text{H}$  COSY NMR, acetone- $d_6$

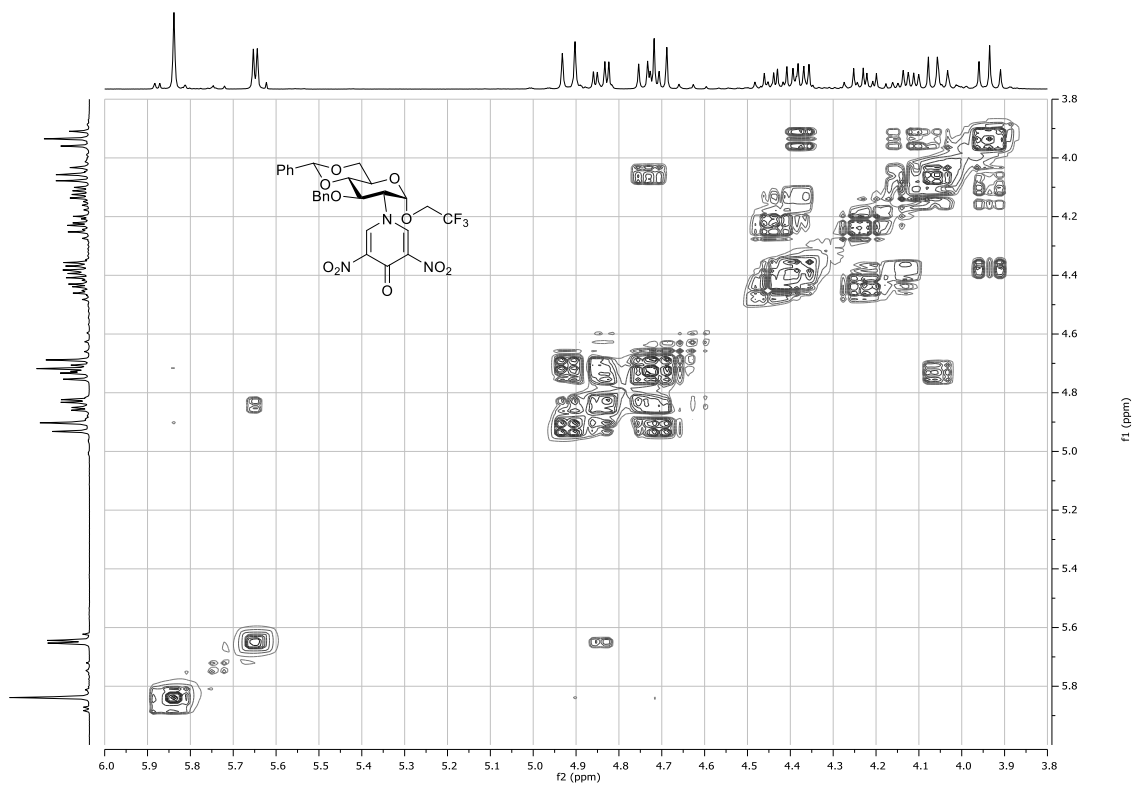

$^1\text{H}$ - $^{13}\text{C}$  HSQC NMR, acetone- $d_6$

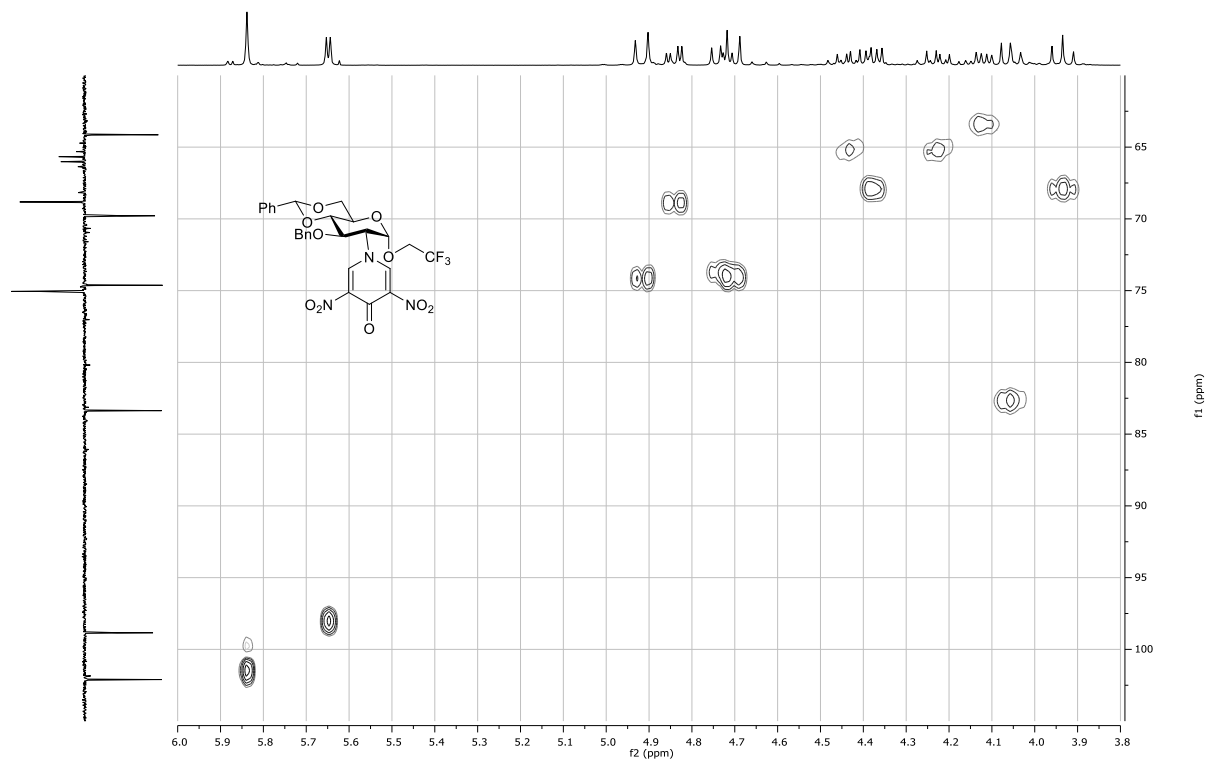

Supplement: jo7b00470_si_001.pdf [file jo7b00470_si_001.pdf]
